# Supplementary material for: A distinct class of conjugative megaplasmids includes potential vehicles for prophage dissemination
Source: bioRxiv preprint, doi:10.64898/2026.02.21.707213, version 1 (2026-02-22)
Supplement: Supplementary Tables 1-14 [file 707213_file02.xlsx]

## Sheet: ST1
Supplementary Table 1 | The information of the 38 curated Hodor genomes. The information of the prophage genomes in Hodors is shown if available.
Source	Group	ID	Genomes	GC content (%)	Reference (habitat)	Reads for assembly and/or curation (via Pebblescout)	Original length (bp)	Final length (bp)	Final status	with large terminase?	Prophage length (bp)
HPGC	Group1	Hodor01	huge_phage_3334	47.99	Camargo.et.al.2023 (human gut)	ERR1110324	389222	403494	Complete and circular	yes	39529
HPGC	Group1	Hodor02	huge_phage_4614	46.83	Camargo.et.al.2023 (human gut)	ERR1136993/ ERR1137258	346615	409900	Complete and circular	yes	46358
HPGC	Group1	Hodor03	huge_phage_7428	46.8	Nayfach.et.al.2021 (human gut)	ERR1136720	366490	366371	Complete and circular	no	na
HPGC	Group1	Hodor04	huge_phage_2782	46.79	Nayfach.et.al.2021 (human gut)	ERR688596	361711	369474	Complete and circular	no	na
HPGC	Group1	Hodor05	huge_phage_8811	46.81	Nayfach.et.al.2021 (human gut)	ERR710431	370419	371201	Complete and circular	no	na
HPGC	Group1	Hodor06	huge_phage_2159	46.73	Nayfach.et.al.2021 (human gut)	ERR1018228	374394	374341	Complete and circular	no	na
HPGC	Group1	Hodor07	huge_phage_5020	46.93	Carter.et.al.2023 (human gut)	ERR7738563	257394	386241	Complete and circular	no	na
HPGC	Group1	Hodor08	huge_phage_5175	46.88	Nayfach.et.al.2021 (human gut)	na	368140	368140	near-complete	no	na
HPGC	Group1	Hodor09	huge_phage_7795	46.84	Nayfach.et.al.2021 (human gut)	na	374772	374772	near-complete	no	na
newly assembled	Group1	Hodor22	ERR11475043_NODE_132_curated_complete	48.17	PRJEB62473 (human gut)	ERR11475043	na	383978	Complete and circular	yes	47199
newly assembled	Group1	Hodor37	ERR14838501_contig_2618_length_403255	47.3	PRJEB88320 (human gut)	SRR23689840/ ERR14838501	na	403252	Complete and circular	no	na
HPGC	Group2	Hodor10	huge_phage_1554	44.97	Camargo.et.al.2023 (human gut)	ERR912103/ ERR3451245/ ERR4341782	221108	361797	Complete and circular	yes	46561
HPGC	Group2	Hodor11	huge_phage_4400	44.5	Nayfach.et.al.2021 (human gut)	ERR911974	339250	339198	Complete and circular	no	na
HPGC	Group2	Hodor12	huge_phage_3742	44.44	Nayfach.et.al.2021 (human gut)	ERR636369	349704	349676	Complete and circular	no	na
HPGC	Group2	Hodor13	huge_phage_2979	44.64	Nayfach.et.al.2021 (human gut)	SRR513158	265555	350354	Complete and circular	no	na
HPGC	Group2	Hodor14	huge_phage_4378	44.48	Carter.et.al.2023 (human gut)	ERR7738566	353089	353139	Complete and circular	no	na
HPGC	Group2	Hodor15	huge_phage_8498	44.62	Carter.et.al.2023 (human gut)	ERR7745335	211275	378266	Complete and circular	no	na
HPGC	Group2	Hodor16	huge_phage_4380	44.65	Nayfach.et.al.2021 (human gut)	SRR059350	216153	336761	near-complete	no	na
HPGC	Group2	Hodor17	huge_phage_1888	44.56	Nayfach.et.al.2021 (human gut)	ERR479171	339320	339609	near-complete	no	na
HPGC	Group2	Hodor18	huge_phage_8550	44.39	Carter.et.al.2023 (human gut)	ERR7738586	342836	343204	near-complete	no	na
HPGC	Group2	Hodor19	huge_phage_3584	44.53	Carter.et.al.2023 (human gut)	ERR7745963	278791	356550	near-complete	no	na
NCBI	Group2	Hodor20	NZ_DXPE01000001	44.63	PRJNA224116 (human gut)	DRR171531	341699	341644	Complete and circular	no	na
newly assembled	Group2	Hodor21	SRR12101443_NODE_2_curated_complete	44.58	PRJNA641593 (human gut)	SRR12101443/ SRR12101424	na	341627	Complete and circular	no	na
newly assembled	Group2	Hodor23	SRR7880223_NODE_5_curated_final	44.57	PRJNA492158 (human gut)	SRR7880223	na	340655	near-complete	no	na
newly assembled	Group2	Hodor24	ERR11473358_NODE_44_curated_complete	44.49	PRJEB51353 (human gut)	ERR11473358	na	356052	Complete and circular	no	na
newly assembled	Group2	Hodor25	ERR11566171_NODE_22_curated_complete	44.62	PRJEB51353 (human gut)	ERR11566171	na	309760	Complete and circular	no	na
newly assembled	Group2	Hodor26	ERR9250082_NODE_7_curated_complete	44.68	PRJEB51408 (human gut)	ERR9250082	na	338274	Complete and circular	no	na
newly assembled	Group2	Hodor27	SRR13207761_NODE_54_curated_final	44.44	PRJNA665245 (human gut)	SRR13207761	na	339428	near-complete	no	na
newly assembled	Group2	Hodor28	ERR11029134_NODE_10_curated_complete	44.46	PRJEB60097 (human gut)	ERR11029134	na	345444	Complete and circular	no	na
newly assembled	Group2	Hodor29	ERR4341740_NODE_51_curated_complete	44.91	PRJEB39223 (human gut)	ERR4341740	na	396756	Complete and circular	yes	46295
newly assembled	Group2	Hodor30	ERR3450778_NODE_10_curated_final	44.45	PRJEB32731 (human gut)	ERR3450778	na	329618	near-complete	no	na
newly assembled	Group2	Hodor31	ERR4334199_NODE_10_curated_complete	44.67	PRJEB39223 (human gut)	ERR4334199	na	348987	Complete and circular	no	na
newly assembled	Group2	Hodor32	SRR21858778_NODE_12_curated_final	44.56	PRJNA528511 (human gut)	SRR21858778	na	316402	near-complete	no	na
newly assembled	Group2	Hodor33	ERR6395353_NODE_54_curated_final	44.59	PRJEB46664 (human gut)	ERR6395353	na	335238	near-complete	no	na
newly assembled	Group2	Hodor34	ERR11473975_NODE_51_curated_circular	44.85	PRJEB51353 (human gut)	ERR11473975	na	349825	Circular with one gap	yes	46710
newly assembled	Group2	Hodor35	SRR18461266_NODE_121_curated_complete	44.7	PRJNA818303 (human gut)	SRR18461266	na	332964	Complete and circular	no	na
newly assembled	Group2	Hodor36	SRR6451797_NODE_81_curated_circular	44.5	PRJNA354235 (human gut)	SRR6451797/ SRR6451804/ SRR6451805/ SRR6451811	na	336911	Circular with three gaps	no	na
newly assembled	Group2	Hodor38	ERR14838502_contig_1965_length_377046	45.13	PRJEB88320 (human gut)	SRR23690006/ ERR14838502	na	379934	Complete and circular	no	na

## Sheet: ST2
Supplementary Table 2 | The protein families identified in the 38 curated Hodor genomes. Note that the prophage genomes were not removed.
Representative	Representative length (aa)	ERR11475043_NODE_132_curated_complete	ERR14838501_contig_2618_length_403255_complete	huge_phage_2159_curated_complete	huge_phage_2782_curated_complete	huge_phage_3334_curated_complete	huge_phage_4614_curated_complete	huge_phage_5020_curated_complete	huge_phage_5175	huge_phage_7428_curated_complete	huge_phage_7795	huge_phage_8811_curated_complete	ERR11029134_NODE_10_curated_complete	ERR11473358_NODE_44_curated_complete	ERR11566171_NODE_22_curated_complete	ERR14838502_contig_1965_length_377046	ERR4334199_NODE_10_curated_complete	ERR4341740_NODE_51_curated_complete	ERR6395353_NODE_54_curated_final	ERR9250082_NODE_7_curated_complete	huge_phage_1554_curated_complete	huge_phage_1888_curated_final	huge_phage_2979_curated_complete	huge_phage_3584_curated_final	huge_phage_3742_curated_complete	huge_phage_4378_curated_complete	huge_phage_4380_curated_final	huge_phage_4400_curated_complete	huge_phage_8498_curated_complete	huge_phage_8550_curated_final	NZ_DXPE01000001_curated_complete	SRR12101443_NODE_2_curated_complete	SRR13207761_NODE_54_curated_final	SRR18461266_NODE_121_curated_complete	SRR21858778_NODE_12_curated_final	SRR6451797_NODE_81_curated_circular	SRR7880223_NODE_5_curated_final	ERR3450778_NODE_10_curated_final	ERR11473975_NODE_51_curated_circular	Genome count	bfvd	pdb	NCBIFAM	manual annotation
ERR11029134_NODE_10_curated_complete_236	447	1	1	1	1	1	1	1	1	1	1	1	1	1	1	1	1	1	1	1	1	1	1	1	1	1	1	1	1	1	1	1	1	1	1	1	1	1	1	38	Preprotein translocase, SecY subunit	Precise Resting State of Thermus thermophilus SecYEG	preprotein translocase subunit SecY	SecY
ERR11029134_NODE_10_curated_complete_238	84	1	1	1	1	1	1	1	1	1	1	1	1	1	1	1	1	1	1	1	1	1	1	1	1	1	1	1	1	1	1	1	1	1	1	1	1	1	1	38	na	na	na	SecE
ERR11029134_NODE_10_curated_complete_298	741	1	1	1	1	1	1	1	1	1	1	1	1	1	1	1	1	1	1	1	1	1	1	1	1	1	1	1	1	1	1	1	1	1	1	1	1	1	1	38	Anaerobic ribonucleoside triphosphate reductase	Structural basis for allosteric substrate specificity regulation in class III ribonucleotide reductases: NRDD in complex with dATP	anaerobic ribonucleoside-triphosphate reductase	anaerobic ribonucleotide reductase
ERR11029134_NODE_10_curated_complete_68	73	1	1	1	1	1	1	1	1	1	1	1	1	1	1	1	1	1	1	1	1	1	1	1	1	1	1	1	1	1	1	1	1	1	1	1	1	1	1	38	Uncharacterized protein	Crystal structure of the v-Src SH3 domain Q128R mutant	phiSA1p31 domain	na
ERR11475043_NODE_132_curated_complete_194	798	1	1	1	1	1	1	1	1	1	1	1	1	1	1	1	1	1	1	1	1	1	1	1	1	1	1	1	1	1	1	1	1	1	1	1	1	1	1	38	DNA ligase (NAD(+)) (EC 6.5.1.2)	Escherichia coli LigA (K115M) in complex with NAD+	DNA ligase (NAD(+)) LigA	DNA ligase A (5TT5)
ERR11475043_NODE_132_curated_complete_63	7704	1	1	1	1	1	1	1	1	1	1	1	1	1	1	1	1	1	1	1	1	1	1	1	1	1	2	1	1	1	1	1	1	1	1	1	1	1	1	38	na	na	na	>7300 aa protein
ERR11475043_NODE_132_curated_complete_65	223	1	1	1	1	1	1	1	1	1	1	1	1	1	1	1	1	1	1	1	1	1	1	1	1	1	1	1	1	1	1	1	1	1	1	1	1	1	1	38	na	na	na	the gene one gene away for the giant protein
ERR11475043_NODE_132_curated_complete_75	391	1	1	1	1	1	1	1	1	1	1	1	1	1	1	1	1	1	1	1	1	1	1	1	1	1	1	1	1	1	1	1	1	1	1	1	1	1	1	38	na	na	na	Trigger factor
ERR11566171_NODE_22_curated_complete_304	117	1	1	1	1	1	1	1	1	1	1	1	1	1	1	1	1	1	1	1	1	1	1	1	1	1	1	1	1	1	1	1	1	1	1	1	1	1	1	38	Uncharacterized protein	Crystal structure of iMazG from Vibrio DAT 722: Ctag-iMazG (P41212)	flagellar hook-basal body complex protein FliE	na
ERR9250082_NODE_7_curated_complete_274	141	1	1	1	1	1	1	1	1	1	1	1	1	1	1	1	1	1	1	1	1	1	1	1	1	1	1	1	1	1	1	1	1	1	1	1	1	1	1	38	DUF2493 domain-containing protein	Universal stress protein (USP) domain of KdpD histidine kinase in complex with second messenger c-di-AMP	methylglyoxal synthase	putative UDP-N-acetylglucosamine 2-epimerase (3OT5)
huge_phage_2782_curated_complete_230	563	1	1	1	1	1	1	1	1	1	1	1	1	1	1	1	1	1	1	1	1	1	1	1	1	1	1	1	1	1	1	1	1	1	2	1	1	1	1	38	Band 7 domain-containing protein	na	na	MEMBRANE PROTEIN (7VHP)
huge_phage_3334_curated_complete_150	87	1	1	1	1	1	1	1	1	1	1	1	1	1	1	1	1	1	1	1	1	1	1	1	1	1	1	1	1	1	1	1	1	1	1	1	1	1	1	38	na	na	na	SecG
huge_phage_3584_curated_final_156	2654	1	1	1	1	1	1	1	1	1	1	1	1	1	1	1	1	1	1	1	1	1	1	1	1	1	1	1	1	1	1	1	1	1	1	1	1	1	1	38	na	na	na	>2600 aa protein
ERR11029134_NODE_10_curated_complete_286	63	1	1	1	1	1	1	1	1	1	1	1	1	1	1	1	1	1	0	1	1	1	1	1	1	1	1	1	1	1	1	1	1	1	1	1	1	1	1	37	Uncharacterized protein	Crystal structure of the Spc24-Spc25/Cnn1 binding interface	na	na
ERR14838501_contig_2618_length_403255_complete_307	480	1	1	1	1	1	1	1	1	1	1	1	1	1	1	1	1	1	1	1	1	1	1	1	1	1	1	1	1	1	1	1	1	1	1	1	1	1	0	37	na	Structure of Cdc123 bound to eIF2-gammaDIII domain	na	na
huge_phage_3584_curated_final_282	83	1	1	1	1	1	1	1	1	1	1	1	1	1	1	1	1	1	1	1	1	1	1	1	1	1	1	0	1	1	1	1	1	1	1	1	1	1	1	37	na	na	na	na
huge_phage_4378_curated_complete_53	243	1	1	1	1	1	1	1	1	1	1	1	1	1	1	1	1	1	1	1	1	1	1	0	1	2	1	1	1	1	2	1	1	1	1	1	1	1	1	37	na	na	na	MacA-like protein (3FPP)
huge_phage_5020_curated_complete_101	4342	2	1	1	2	2	2	1	1	2	1	2	1	3	2	1	1	2	1	1	2	1	1	1	1	1	1	1	1	0	1	1	1	1	1	1	1	1	1	37	na	na	na	na
ERR11029134_NODE_10_curated_complete_4	191	1	1	1	1	1	1	1	1	1	1	1	1	1	1	1	1	1	1	1	1	1	1	1	1	1	1	1	1	1	1	1	1	1	1	1	1	0	0	36	Uncharacterized protein	na	na	hyp
ERR11029134_NODE_10_curated_complete_66	209	1	1	1	1	0	1	1	1	1	0	1	1	1	1	1	1	1	1	1	1	1	1	1	1	1	1	1	1	1	1	1	1	1	1	1	1	1	1	36	na	na	na	hyp
ERR11029134_NODE_10_curated_complete_71	141	1	1	1	1	1	1	0	1	1	1	1	1	1	1	1	1	1	1	1	1	1	1	1	1	1	1	1	1	1	1	1	1	1	1	1	1	1	0	36	Uncharacterized protein	na	na	hyp
ERR14838501_contig_2618_length_403255_complete_149	115	1	1	1	1	1	0	1	1	1	1	1	1	1	1	1	1	1	1	1	1	1	1	1	1	1	1	1	1	1	1	1	1	0	1	1	1	1	1	36	na	na	na	na
ERR4334199_NODE_10_curated_complete_317	255	1	1	1	1	1	1	1	1	1	1	1	1	1	1	1	1	1	1	1	1	1	1	1	1	1	1	1	1	1	1	1	1	1	1	1	1	0	0	36	na	na	na	hyp
ERR11029134_NODE_10_curated_complete_106	74	1	1	1	1	1	1	1	1	1	1	1	1	1	1	1	1	1	1	1	0	1	1	1	1	1	1	1	1	1	1	1	1	1	0	1	1	1	0	35	Helix-turn-helix domain protein	High-resolution crystal structure of the restriction-modification controller protein C.AhdI from Aeromonas hydrophila	RstR family transcriptional repressor	na
ERR11029134_NODE_10_curated_complete_125	242	1	2	2	1	2	2	1	2	1	2	1	2	2	0	1	2	1	2	1	1	2	2	2	2	2	2	2	2	2	2	2	2	2	2	2	1	0	0	35	na	na	na	na
ERR11029134_NODE_10_curated_complete_256	255	0	1	1	1	1	1	1	1	1	1	1	1	1	0	1	1	1	1	1	1	1	1	1	1	1	1	1	1	1	1	1	1	1	1	1	1	1	0	35	Radical SAM superfamily	Native anSMEcpe with bound AdoMet and Cp18Cys peptide	YydG family radical SAM peptide epimerase	na
ERR11029134_NODE_10_curated_complete_74	433	1	1	1	1	1	1	1	1	1	1	1	1	1	1	1	1	1	1	1	1	1	1	0	1	1	1	1	1	1	0	1	1	1	0	1	1	1	1	35	ATPase AAA-type core domain-containing protein	Mre11 Rad50 binding domain in complex with Rad50 and AMP-PNP	restriction system-associated AAA family ATPase	na
ERR11029134_NODE_10_curated_complete_9	222	0	1	1	0	1	1	1	1	1	1	1	1	1	1	1	1	1	1	1	1	1	1	1	1	1	1	1	1	1	1	1	1	1	1	1	1	1	0	35	na	na	na	na
ERR11473358_NODE_44_curated_complete_359	248	1	1	1	1	1	1	1	1	1	1	1	1	1	1	1	1	2	1	1	0	1	1	1	1	1	1	2	1	1	1	1	1	1	0	1	1	1	0	35	na	na	na	na
ERR11475043_NODE_132_curated_complete_158	49	1	1	1	1	1	1	1	1	1	1	1	1	1	1	1	1	1	1	1	0	1	1	1	1	1	1	1	1	1	1	1	1	1	0	1	1	1	0	35	na	na	na	na
ERR14838501_contig_2618_length_403255_complete_160	492	0	1	1	1	1	0	1	1	1	1	1	1	1	1	1	1	1	1	1	1	1	1	1	2	1	1	1	1	1	1	1	1	1	0	1	1	1	2	35	PIN domain-containing protein	na	phosphate starvation-inducible protein PhoH	na
ERR3450778_NODE_10_curated_final_36	586	0	1	1	0	1	0	1	1	1	1	1	1	1	1	1	1	1	1	1	1	1	1	1	1	1	1	1	1	1	1	1	1	1	1	1	1	1	1	35	na	Crystal structure of solute-binding protein stm0429 from salmonella enterica subsp. enterica serovar typhimurium str. lt2, target efi-510776, a closed conformation, in complex with glycerol and acetate	sulfate ABC transporter substrate-binding protein	vWA domain-containing protein
huge_phage_4378_curated_complete_38	150	1	1	1	1	1	1	1	1	1	1	1	1	1	1	1	1	2	1	1	0	1	1	1	1	1	1	2	1	1	1	1	1	1	0	1	1	1	0	35	Uncharacterized protein	na	na	na
huge_phage_8550_curated_final_35	159	1	1	1	1	1	1	1	1	1	1	1	1	1	1	1	1	1	1	1	0	1	1	1	1	1	1	1	1	1	1	1	1	1	0	1	1	1	0	35	Uncharacterized protein	Crystal Structure of Mis18 'Yippee-like' Domain	na	na
SRR12101443_NODE_2_curated_complete_122	110	0	1	1	1	1	1	1	1	1	1	1	1	1	0	1	1	1	1	1	1	1	1	1	1	1	1	1	1	1	1	1	1	1	1	1	1	1	0	35	Uncharacterized protein	na	na	na
ERR11029134_NODE_10_curated_complete_173	241	1	1	1	1	1	1	1	1	1	1	1	1	1	1	1	1	1	0	1	1	1	1	1	1	1	1	0	1	1	1	1	1	1	1	1	0	0	1	34	DNA methylase adenine-specific domain-containing protein	na	16S rRNA (guanine(527)-N(7))-methyltransferase RsmG	na
ERR14838501_contig_2618_length_403255_complete_165	268	0	1	1	0	1	0	1	1	1	1	1	1	1	1	1	1	1	1	1	1	1	1	1	1	1	0	1	1	1	1	1	1	1	1	1	1	1	1	34	na	na	na	na
huge_phage_2782_curated_complete_353	361	1	1	1	1	1	1	1	1	1	1	1	1	1	0	1	1	1	1	1	0	1	1	1	1	1	1	1	1	1	1	1	1	1	1	1	1	0	0	34	na	na	na	na
huge_phage_3584_curated_final_352	164	0	1	1	1	1	0	1	1	1	1	2	1	1	1	1	1	1	1	1	1	1	1	1	1	1	0	1	1	0	1	1	1	1	1	1	1	1	1	34	Uncharacterized protein	na	na	na
ERR11029134_NODE_10_curated_complete_73	219	1	0	1	1	1	1	0	1	1	1	1	1	1	1	1	1	1	1	1	1	1	1	0	1	1	1	1	1	1	0	1	1	1	0	1	1	1	1	33	RloB-like protein	na	na	na
ERR11475043_NODE_132_curated_complete_111	155	1	1	1	1	0	1	0	1	1	0	1	1	1	1	1	1	1	1	1	1	1	1	1	1	1	1	1	1	0	0	1	1	1	1	1	1	1	1	33	Macro domain-containing protein	Structure of a Protein of Unknown Function from Bacteroides thetaiotaomicron.	ADP-ribose-binding protein	na
ERR11475043_NODE_132_curated_complete_237	94	1	0	1	1	2	1	1	2	2	1	1	1	1	0	1	1	1	1	1	0	1	1	1	1	1	1	1	1	1	1	1	1	1	0	1	1	1	0	33	Phage protein	na	na	na
ERR11475043_NODE_132_curated_complete_66	244	1	1	1	1	1	1	1	1	1	1	1	1	1	1	0	1	1	1	1	1	1	1	0	1	1	0	1	0	0	1	1	1	1	1	1	1	1	1	33	na	na	na	na
huge_phage_4380_curated_final_114	276	1	1	0	1	1	1	0	1	1	1	1	1	1	1	1	1	1	1	1	0	1	1	1	1	1	1	1	1	0	1	1	1	1	0	1	1	1	1	33	Phosphoadenosine phosphosulphate reductase	1.90 Angstrom Resolution Crystal Structure Phosphoadenosine Phosphosulfate Reductase (CysH) from Vibrio vulnificus	DNA phosphorothioation system sulfurtransferase DndC	na
ERR11029134_NODE_10_curated_complete_128	56	1	1	1	1	1	0	1	1	1	1	1	1	1	0	1	1	0	1	0	1	1	1	1	1	1	1	1	1	1	1	1	1	1	1	1	1	0	0	32	Rhomboid N-terminal domain	Crystal Structure of L. monocytogenes PstA	mercury resistance system periplasmic binding protein MerP	na
ERR11473358_NODE_44_curated_complete_10	361	1	2	1	1	1	1	1	1	1	1	1	1	1	0	1	1	1	1	1	0	1	1	1	1	1	1	1	1	0	1	1	1	1	0	1	1	0	0	32	na	na	na	na
huge_phage_3334_curated_complete_105	350	0	1	1	1	1	0	1	1	1	1	1	2	1	1	0	0	1	1	1	1	1	1	1	1	1	0	1	1	1	1	1	1	1	1	1	1	0	1	32	na	na	na	na
huge_phage_8550_curated_final_30	62	1	1	0	1	1	1	1	1	1	1	1	1	1	1	1	1	1	1	1	0	1	1	1	1	1	1	1	1	1	0	0	1	1	0	1	1	1	0	32	na	na	na	na
ERR11029134_NODE_10_curated_complete_119	160	0	1	1	0	1	1	1	1	1	1	0	1	1	0	1	1	1	1	1	0	1	1	1	1	1	1	1	1	1	1	1	1	1	0	1	1	1	0	31	Uncharacterized protein	na	na	na
ERR11029134_NODE_10_curated_complete_192	196	0	1	1	0	0	1	0	1	0	0	1	1	1	1	1	1	1	1	1	1	1	1	1	1	1	1	1	1	1	1	1	1	1	1	1	1	0	1	31	na	na	na	na
ERR14838501_contig_2618_length_403255_complete_257	165	1	1	1	1	1	1	1	1	1	1	1	1	1	1	1	1	0	1	0	0	1	0	1	1	1	1	1	1	1	1	0	1	1	0	1	0	1	1	31	na	na	na	na
huge_phage_1554_curated_complete_342	135	0	0	0	0	1	0	1	0	1	1	1	1	1	1	1	1	1	1	1	1	1	1	1	1	1	1	1	1	1	1	1	1	0	1	1	1	1	1	31	na	na	na	na
ERR11029134_NODE_10_curated_complete_188	311	0	1	1	0	0	0	1	0	0	0	0	1	1	1	1	1	1	1	1	1	1	1	1	1	1	1	1	1	1	1	1	1	1	1	0	1	1	1	29	na	na	na	na
huge_phage_5020_curated_complete_182	187	1	0	1	0	1	1	1	1	1	1	1	1	1	1	1	1	1	0	1	1	1	1	0	1	0	1	0	0	0	1	1	1	1	1	1	0	1	1	29	Zeta toxin domain-containing protein	Molecular and structural characterization of the PezAT chromosomal toxin-antitoxin system of the human pathogen Streptococcus pneumoniae	type II toxin-antitoxin system toxin PezT	na
ERR11029134_NODE_10_curated_complete_111	99	1	1	0	1	0	1	0	1	0	0	0	1	1	0	1	1	1	1	1	0	1	1	1	1	1	1	1	1	1	1	1	1	1	0	1	1	1	0	28	Phage protein	na	na	na
ERR11029134_NODE_10_curated_complete_174	172	0	0	1	0	1	0	0	1	1	0	0	1	1	1	1	1	1	0	1	1	1	1	1	1	1	1	0	1	1	1	1	1	1	1	1	0	1	1	28	Uncharacterized protein	na	na	na
ERR11473358_NODE_44_curated_complete_163	255	0	1	1	0	0	1	0	0	0	0	0	1	1	0	1	1	1	1	1	1	1	1	2	1	1	1	1	2	2	1	1	1	1	1	1	1	1	0	28	na	na	na	na
ERR11473358_NODE_44_curated_complete_6	271	1	2	1	1	1	1	1	1	1	1	1	0	1	0	1	1	1	1	0	0	1	1	1	1	1	1	0	1	1	1	1	0	0	0	1	0	1	0	28	GmrSD restriction endonucleases N-terminal domain-containing protein	na	DGQHR domain	na
ERR11473975_NODE_51_curated_circular_342	789	0	0	1	0	0	0	0	0	0	0	0	1	1	1	1	1	1	1	1	1	1	1	1	1	1	1	1	1	1	1	1	1	1	1	1	1	1	1	28	na	na	na	na
ERR11029134_NODE_10_curated_complete_10	395	0	0	0	0	0	0	0	0	0	0	0	1	1	1	1	1	1	1	1	1	1	1	1	1	1	1	1	1	1	1	1	1	1	1	1	1	1	1	27	DUF932 domain-containing protein	na	na	na
ERR11029134_NODE_10_curated_complete_11	414	0	0	0	0	0	0	0	0	0	0	0	1	1	1	1	1	1	1	1	1	1	1	1	1	1	1	1	1	1	1	1	1	1	1	1	1	1	1	27	YqaJ-domain containing exonuclease	na	na	na
ERR11029134_NODE_10_curated_complete_12	56	0	0	0	0	0	0	0	0	0	0	0	1	1	1	1	1	1	1	1	1	1	1	1	1	1	1	1	1	1	1	1	1	1	1	1	1	1	1	27	Uncharacterized protein	Crystal structure of a putative dinitrogenase (mj0327) from methanocaldococcus jannaschii dsm at 1.70 A resolution	TIGR04203 family streptococcal surface protein repeat	na
ERR11029134_NODE_10_curated_complete_13	132	0	0	0	0	0	0	0	0	0	0	0	1	1	1	1	1	1	1	1	1	1	1	1	1	1	1	1	1	1	1	1	1	1	1	1	1	1	1	27	Nucleoside 2-deoxyribosyltransferase	Crystal structure of Nucleoside 2-deoxyribosyltransferase from Trypanosoma brucei at 1.6 A resolution with 1-METHYLQUINOLIN-2(1H)-ONE bound	YtoQ family protein	na
ERR11029134_NODE_10_curated_complete_136	180	0	0	0	0	0	0	0	0	0	0	0	1	1	1	1	1	1	1	1	1	1	1	1	1	1	1	1	1	1	1	1	1	1	1	1	1	1	1	27	na	na	na	na
ERR11029134_NODE_10_curated_complete_138	262	0	0	0	0	0	0	0	0	0	0	0	1	1	1	1	1	1	1	1	1	1	1	1	1	1	1	1	1	1	1	1	1	1	1	1	1	1	1	27	na	na	na	na
ERR11029134_NODE_10_curated_complete_139	71	0	0	0	0	0	0	0	0	0	0	0	1	1	1	1	1	1	1	1	1	1	1	1	1	1	1	1	1	1	1	1	1	1	1	1	1	1	1	27	Uncharacterized protein	na	na	na
ERR11029134_NODE_10_curated_complete_14	766	0	0	0	0	0	0	0	0	0	0	0	1	1	1	1	1	1	1	1	1	1	1	1	1	1	1	1	1	1	1	1	1	1	1	1	1	1	1	27	DNA packaging protein	Crystal structure of the binary complex of RecD2 with DNA	ATP-dependent RecD-like DNA helicase	helicase
ERR11029134_NODE_10_curated_complete_140	156	0	0	0	0	0	0	0	0	0	0	0	1	1	1	1	1	1	1	1	1	1	1	1	1	1	1	1	1	1	1	1	1	1	1	1	1	1	1	27	na	na	na	na
ERR11029134_NODE_10_curated_complete_146	178	0	0	0	0	0	0	0	0	0	0	0	1	1	1	1	1	1	1	1	1	1	1	1	1	1	1	1	1	1	1	1	1	1	1	1	1	1	1	27	Endonuclease	Sulfolobus solfataricus HJC mutants	na	na
ERR11029134_NODE_10_curated_complete_147	251	0	0	0	0	0	0	0	0	0	0	0	1	1	1	1	1	1	1	1	1	1	1	1	1	1	1	1	1	1	1	1	1	1	1	1	1	1	1	27	Uncharacterized protein	Crystal structure of the TarA wall teichoic acid glycosyltransferase bound to UDP	exopolysaccharide biosynthesis glycosyltransferase EpsA	na
ERR11029134_NODE_10_curated_complete_15	176	0	0	0	0	0	0	0	0	0	0	0	1	1	1	2	1	1	1	1	1	1	1	1	1	1	1	1	1	1	1	1	1	1	1	1	1	1	1	27	na	na	na	na
ERR11029134_NODE_10_curated_complete_158	271	0	0	0	0	0	0	0	0	0	0	0	1	1	1	1	1	1	1	1	1	1	1	1	1	1	1	1	1	1	1	1	1	1	1	1	1	1	1	27	na	Crystal structure of an uncharacterized protein from Mannheimia succiniciproducens	type I-C CRISPR-associated protein Cas5c	Cas5
ERR11029134_NODE_10_curated_complete_159	644	0	0	0	0	0	0	0	0	0	0	0	1	1	1	1	1	1	1	1	1	1	1	1	1	1	1	1	1	1	1	1	1	1	1	1	1	1	1	27	na	type I-C Cascade bound to AcrIF2	type I-C CRISPR-associated protein Cas8c/Csd1	Cas8c/Csd1
ERR11029134_NODE_10_curated_complete_160	312	0	0	0	0	0	0	0	0	0	0	0	1	1	1	1	1	1	1	1	1	1	1	1	1	1	1	1	1	1	1	1	1	1	1	1	1	1	1	27	na	type I-C Cascade	type I-C CRISPR-associated protein Cas7/Csd2	Cas7
ERR11029134_NODE_10_curated_complete_162	67	0	0	0	0	0	0	0	0	0	0	0	1	1	1	1	1	1	1	1	1	1	1	1	1	1	1	1	1	1	1	1	1	1	1	1	1	1	1	27	Uncharacterized protein	na	na	na
ERR11029134_NODE_10_curated_complete_165	308	0	0	0	0	0	0	0	0	0	0	0	1	1	1	1	1	1	1	1	1	1	1	1	1	1	1	1	1	1	1	1	1	1	1	1	1	1	1	27	na	na	na	na
ERR11029134_NODE_10_curated_complete_166	282	0	0	0	0	0	0	0	0	0	0	0	1	1	1	1	1	1	1	1	1	1	1	1	1	1	1	1	1	1	1	1	1	1	1	1	1	1	1	27	na	na	na	na
ERR11029134_NODE_10_curated_complete_178	267	0	0	0	0	0	0	0	0	0	0	0	1	1	1	1	1	1	1	1	1	1	1	1	1	1	1	1	1	1	1	1	1	1	1	1	1	1	1	27	na	na	na	na
ERR11029134_NODE_10_curated_complete_180	257	0	0	0	0	0	0	0	0	0	0	0	1	1	1	1	1	1	1	1	1	1	1	1	1	1	1	1	1	1	1	1	1	1	1	2	1	1	1	27	na	na	na	na
ERR11029134_NODE_10_curated_complete_194	283	0	0	0	0	0	0	0	0	0	0	0	1	1	1	1	1	1	1	1	1	1	1	1	1	1	1	1	1	1	1	1	1	1	1	1	1	1	1	27	na	na	conjugal transfer protein TrbP	na
ERR11029134_NODE_10_curated_complete_202	1380	0	0	0	0	0	0	0	0	0	0	0	1	1	1	1	1	1	1	1	1	1	1	1	1	1	1	1	1	1	1	1	1	1	1	1	1	1	1	27	DNA-directed DNA polymerase (EC 2.7.7.7)	DNA polymerase from M. tuberculosis	DNA polymerase III subunit alpha	DNA polymerase III subunit alpha
ERR11029134_NODE_10_curated_complete_203	561	0	0	0	0	0	0	0	0	0	0	0	1	1	1	1	1	1	1	1	1	1	1	1	1	1	1	1	1	1	1	1	1	1	1	1	1	1	1	27	na	na	na	na
ERR11029134_NODE_10_curated_complete_211	185	0	0	0	0	0	0	0	0	0	0	0	1	1	1	1	1	1	1	1	1	1	1	1	1	1	1	1	1	1	1	1	1	1	1	1	1	1	1	27	na	na	na	the gene two genes away for the giant protein
ERR11029134_NODE_10_curated_complete_212	402	0	0	0	0	0	0	0	0	0	0	0	1	1	1	1	1	1	1	1	1	1	1	1	1	1	1	1	1	1	1	1	1	1	1	1	1	1	1	27	na	na	na	na
ERR11029134_NODE_10_curated_complete_213	77	0	0	0	0	0	0	0	0	0	0	0	1	1	1	1	1	1	1	1	1	1	1	1	1	1	1	1	1	1	1	1	1	1	1	1	1	1	1	27	Uncharacterized protein	na	na	na
ERR11029134_NODE_10_curated_complete_216	213	0	0	0	0	0	0	0	0	0	0	0	1	1	1	1	1	1	1	1	1	1	1	1	1	1	1	1	1	1	1	1	1	1	1	1	1	1	1	27	na	na	na	na
ERR11029134_NODE_10_curated_complete_217	173	0	0	0	0	0	0	0	0	0	0	0	1	1	1	1	1	1	1	1	1	1	1	1	1	1	1	1	1	1	1	1	1	1	1	1	1	1	1	27	Putative adenine-specific methylase	na	phage N-6-adenine-methyltransferase	na
ERR11029134_NODE_10_curated_complete_218	94	0	0	0	0	0	0	0	0	0	0	0	1	1	1	1	1	1	1	1	1	1	1	1	1	1	1	1	1	1	1	1	1	1	1	1	1	1	1	27	na	na	na	na
ERR11029134_NODE_10_curated_complete_219	557	0	0	0	0	0	0	0	0	0	0	0	1	1	1	1	1	1	1	1	1	1	1	1	1	1	1	1	1	1	1	1	1	1	1	1	1	1	1	27	na	na	na	na
ERR11029134_NODE_10_curated_complete_220	450	0	0	0	0	0	0	0	0	0	0	0	1	1	1	1	1	1	1	1	1	1	1	1	1	1	1	1	1	1	1	1	1	1	1	1	1	1	1	27	na	na	na	na
ERR11029134_NODE_10_curated_complete_221	77	0	0	0	0	0	0	0	0	0	0	0	1	1	1	1	1	1	1	1	1	1	1	1	1	1	1	1	1	1	1	1	1	1	1	1	1	1	1	27	Helix-turn-helix domain protein	Crystal structure of the P22 c2 repressor protein in complex with synthetic operator 9T in the presence of Tl+	RstR family transcriptional repressor	na
ERR11029134_NODE_10_curated_complete_222	320	0	0	0	0	0	0	0	0	0	0	0	1	1	1	1	1	1	1	1	1	1	1	1	1	1	1	1	1	1	1	1	1	1	1	1	1	1	1	27	Gp506	Crystal structure of Ta0583, an archaeal actin homolog, SeMet data	plasmid segregation protein ParM	ParM/StbA
ERR11029134_NODE_10_curated_complete_223	155	0	0	0	0	0	0	0	0	0	0	0	1	1	1	1	1	1	1	1	1	1	1	1	1	1	1	1	1	1	1	1	1	1	1	1	1	1	1	27	na	na	na	na
ERR11029134_NODE_10_curated_complete_224	221	0	0	0	0	0	0	0	0	0	0	0	1	1	1	1	1	1	1	1	1	1	1	1	1	1	1	1	1	1	1	1	1	1	1	1	1	1	1	27	na	na	na	na
ERR11029134_NODE_10_curated_complete_225	152	0	0	0	0	0	0	0	0	0	0	0	1	1	1	1	1	1	1	1	1	1	1	1	1	1	1	1	1	1	1	1	1	1	1	1	1	1	1	27	ribonuclease H (EC 3.1.26.4)	Crystal structure of the Ribonuclease H1 from Chlorobium tepidum	ribonuclease HI	na
ERR11029134_NODE_10_curated_complete_226	354	0	0	0	0	0	0	0	0	0	0	0	1	1	1	1	1	1	1	1	1	1	1	1	1	1	1	1	1	1	1	1	1	1	1	1	1	1	1	27	na	na	na	na
ERR11029134_NODE_10_curated_complete_227	165	0	0	0	0	0	0	0	0	0	0	0	1	1	1	1	1	1	1	1	1	1	1	1	1	1	1	1	1	1	1	1	1	1	1	1	1	1	1	27	Putative toxin VapC6 domain, ZN ribbon domain	na	na	na
ERR11029134_NODE_10_curated_complete_228	354	0	0	0	0	0	0	0	0	0	0	0	1	1	1	1	1	1	1	1	1	1	1	1	1	1	1	1	1	1	1	1	1	1	1	1	1	1	1	27	na	na	na	na
ERR11029134_NODE_10_curated_complete_229	225	0	0	0	0	0	0	0	0	0	0	0	1	1	1	1	1	1	1	1	1	1	2	1	1	1	1	1	1	1	1	1	1	1	1	1	1	1	1	27	na	na	na	na
ERR11029134_NODE_10_curated_complete_230	475	0	0	0	0	0	0	0	0	0	0	0	1	1	1	1	1	1	1	1	1	1	1	1	1	1	1	1	1	1	1	1	1	1	1	1	1	1	1	27	na	na	na	na
ERR11029134_NODE_10_curated_complete_231	218	0	0	0	0	0	0	0	0	0	0	0	1	1	1	1	1	1	1	1	1	1	1	1	1	1	1	1	1	1	1	1	1	1	1	1	1	1	1	27	na	na	na	na
ERR11029134_NODE_10_curated_complete_233	172	0	0	0	0	0	0	0	0	0	0	0	1	1	1	1	1	1	1	1	1	1	1	1	1	1	1	1	1	1	1	1	1	1	1	1	1	1	1	27	na	na	na	na
ERR11029134_NODE_10_curated_complete_235	92	0	0	0	0	0	0	0	0	0	0	0	1	1	1	1	1	1	1	1	1	1	1	1	1	1	1	1	1	1	1	1	1	1	1	1	1	1	1	27	Uncharacterized protein	Crystal structure of Snf7 under 200 MPa	pore-forming ESAT-6 family protein	na
ERR11029134_NODE_10_curated_complete_240	324	0	0	0	0	0	0	0	0	0	0	0	1	1	1	1	1	1	1	1	1	1	1	1	1	1	1	1	1	1	1	1	1	1	1	1	1	1	1	27	na	Crystal structure of Sortase B from S. aureus complexed with MTSET	class B sortase	class B sortase based on HP1554 gene structure PDB comparsion and also BLASTp
ERR11029134_NODE_10_curated_complete_243	200	0	0	0	0	0	0	0	0	0	0	0	1	1	1	1	1	1	1	1	1	1	1	1	1	1	1	1	1	1	1	1	1	1	1	1	1	1	1	27	na	na	na	na
ERR11029134_NODE_10_curated_complete_244	84	0	0	0	0	0	0	0	0	0	0	0	1	1	1	1	1	1	1	1	1	1	1	1	1	1	1	1	1	1	1	1	1	1	1	1	1	1	1	27	Uncharacterized protein	na	na	na
ERR11029134_NODE_10_curated_complete_245	99	0	0	0	0	0	0	0	0	0	0	0	1	1	1	1	1	1	1	1	1	1	1	1	1	1	1	1	1	1	1	1	1	1	1	1	1	1	1	27	na	na	na	na
ERR11029134_NODE_10_curated_complete_268	182	0	0	0	0	0	0	0	0	0	0	0	1	1	1	1	1	1	1	1	1	1	1	1	1	1	1	1	1	1	1	1	1	1	1	1	1	1	1	27	na	na	na	na
ERR11029134_NODE_10_curated_complete_270	132	0	0	0	0	0	0	0	0	0	0	0	1	1	1	1	1	1	1	1	1	1	1	1	1	1	1	1	1	1	1	1	1	1	1	1	1	1	1	27	na	na	na	na
ERR11029134_NODE_10_curated_complete_271	292	0	0	0	0	0	0	0	0	0	0	0	1	1	1	1	1	1	1	1	1	1	1	1	1	1	1	1	1	1	1	1	1	1	1	1	1	1	1	27	Streptodornase	Crystal structure of NucA from Streptococcus agalactiae with magnesium ion bound	na	na
ERR11029134_NODE_10_curated_complete_273	151	0	0	0	0	0	0	0	0	0	0	0	1	1	1	1	1	1	1	1	1	1	1	1	1	1	1	1	1	1	1	1	1	1	1	1	1	1	1	27	HNHc domain containing protein	Crystal Structure of Mn-dependent Gme HNH nicking endonuclease from Geobacter metallireducens GS-15, Northeast Structural Genomics Consortium (NESG) Target GmR87	na	na
ERR11029134_NODE_10_curated_complete_276	209	0	0	0	0	0	0	0	0	0	0	0	1	1	1	1	1	1	1	1	1	1	1	1	1	1	1	1	1	1	1	1	1	1	1	1	1	1	1	27	na	na	na	na
ERR11029134_NODE_10_curated_complete_277	649	0	0	0	0	0	0	0	0	0	0	0	1	1	1	1	1	1	1	1	1	1	1	1	1	1	1	1	1	1	1	1	1	1	1	1	1	1	1	27	na	na	na	P-loop NTPase family protein
ERR11029134_NODE_10_curated_complete_278	171	0	0	0	0	0	0	0	0	0	0	0	1	1	1	1	1	1	1	1	1	1	1	1	1	1	1	1	1	1	1	1	1	1	1	1	1	1	1	27	Uncharacterized protein	na	na	na
ERR11029134_NODE_10_curated_complete_279	228	0	0	0	0	0	0	0	0	0	0	0	1	1	1	1	1	1	1	1	1	1	1	1	1	1	1	1	1	1	1	1	1	1	1	1	1	1	1	27	na	na	na	na
ERR11029134_NODE_10_curated_complete_280	131	0	0	0	0	0	0	0	0	0	0	0	1	1	1	1	1	1	1	1	1	1	1	1	1	1	1	1	1	1	1	1	1	1	1	1	1	1	1	27	Uncharacterized protein	na	na	na
ERR11029134_NODE_10_curated_complete_295	460	0	0	0	0	0	0	0	0	0	0	0	1	1	1	1	1	1	1	1	1	1	1	1	1	1	1	2	1	1	1	1	1	1	1	1	2	1	1	27	na	na	na	na
ERR11029134_NODE_10_curated_complete_296	141	0	0	0	0	0	0	0	0	0	0	0	1	1	1	1	1	1	1	1	1	1	1	1	1	1	1	1	1	1	1	1	1	1	1	1	1	1	1	27	dihydrofolate reductase (EC 1.5.1.3)	S. aureus dihydrofolate reductase co-crystallized with propyl-DAP isobutenyl-dihydrophthalazine inhibitor	trimethoprim-resistant dihydrofolate reductase DfrA19	na
ERR11029134_NODE_10_curated_complete_297	226	0	0	0	0	0	0	0	0	0	0	0	1	1	1	1	1	1	1	1	1	1	1	1	1	1	1	1	1	1	1	1	1	1	1	1	1	1	1	27	na	na	na	na
ERR11029134_NODE_10_curated_complete_299	166	0	0	0	0	0	0	0	0	0	0	0	1	1	1	1	1	1	1	1	1	1	1	1	1	1	1	1	1	1	1	1	1	1	1	1	1	1	1	27	na	na	na	na
ERR11029134_NODE_10_curated_complete_300	116	0	0	0	0	0	0	0	0	0	0	0	1	1	1	1	1	1	1	1	1	1	1	1	1	1	1	1	1	1	1	1	1	1	1	1	1	1	1	27	Uncharacterized protein	na	na	na
ERR11029134_NODE_10_curated_complete_302	153	0	0	0	0	0	0	0	0	0	0	0	1	1	1	1	1	1	1	1	1	1	1	1	1	1	1	1	1	1	1	1	1	1	1	1	1	1	1	27	NADAR protein	NMR structure of the E.coli protein YbiA, Northeast Structural Genomics target ET24.	conserved hypothetical protein	na
ERR11029134_NODE_10_curated_complete_303	257	0	0	0	0	0	0	0	0	0	0	0	1	1	1	1	1	1	1	1	1	1	1	1	1	1	1	1	1	1	1	1	1	1	1	1	1	1	1	27	Uncharacterized protein	na	na	na
ERR11029134_NODE_10_curated_complete_305	69	0	0	0	0	0	0	0	0	0	0	0	1	1	1	1	1	1	1	1	1	1	1	1	1	1	1	1	1	1	1	1	1	1	1	1	1	1	1	27	Small CPxCG-related zinc finger protein	na	na	na
ERR11029134_NODE_10_curated_complete_306	90	0	0	0	0	0	0	0	0	0	0	0	1	1	1	1	1	1	1	1	1	1	1	1	1	1	1	1	1	1	1	1	1	1	1	1	1	1	1	27	Uncharacterized protein	na	na	na
ERR11029134_NODE_10_curated_complete_307	254	0	0	0	0	0	0	0	0	0	0	0	1	1	1	1	1	1	1	1	1	1	1	1	1	1	1	1	1	1	1	1	1	1	1	1	1	1	1	27	na	na	na	na
ERR11029134_NODE_10_curated_complete_308	83	0	0	0	0	0	0	0	0	0	0	0	1	1	1	1	1	1	1	1	1	1	1	1	1	1	1	1	1	1	1	1	1	1	1	1	1	1	1	27	Uncharacterized protein	Top7 surface mutant K42A Q43A K46A K57S K58S, and I68R	monooxygenase	na
ERR11029134_NODE_10_curated_complete_310	592	0	0	0	0	0	0	0	0	0	0	0	1	1	1	1	1	1	1	1	1	1	1	1	1	1	1	1	1	1	1	1	1	1	1	1	1	1	1	27	na	na	na	hyp
ERR11029134_NODE_10_curated_complete_311	83	0	0	0	0	0	0	0	0	0	0	0	1	1	1	1	1	1	1	1	1	1	1	1	1	1	1	1	1	1	1	1	1	1	1	1	1	1	1	27	Helix-turn-helix domain-containing protein	Structure of RacA-DNA complex; P21 form	translation initiation factor IF-2 subunit beta	na
ERR11029134_NODE_10_curated_complete_314	385	0	0	0	0	0	0	0	0	0	0	0	1	1	1	1	1	1	1	1	1	1	1	1	1	1	1	1	1	1	1	1	1	1	1	1	1	1	1	27	na	na	na	na
ERR11029134_NODE_10_curated_complete_315	306	0	0	0	0	0	0	0	0	0	0	0	1	1	1	1	1	1	1	1	1	1	1	1	1	1	1	1	1	1	1	1	1	1	1	1	1	1	1	27	na	na	na	na
ERR11029134_NODE_10_curated_complete_316	98	0	0	0	0	0	0	0	0	0	0	0	1	1	1	1	1	1	1	1	1	1	1	1	1	1	1	1	1	1	1	1	1	1	1	1	1	1	1	27	Excisionase	Crystal Structure of mycobacteriophage Pukovnik Xis	DNA binding domain, excisionase family	na
ERR11029134_NODE_10_curated_complete_317	817	0	0	0	0	0	0	0	0	0	0	0	1	1	1	1	1	1	1	1	1	1	1	1	1	1	1	1	1	1	1	1	1	1	1	1	1	1	1	27	DNA topoisomerase (EC 5.6.2.1)	NONCOVALENT COMPLEX OF E.COLI DNA TOPOISOMERASE III WITH AN 8-BASE SINGLE-STRANDED DNA OLIGONUCLEOTIDE	DNA topoisomerase III	topoisomerase
ERR11029134_NODE_10_curated_complete_318	135	0	0	0	0	0	0	0	0	0	0	0	1	1	1	1	1	1	1	1	1	1	1	1	1	1	1	1	1	1	1	1	1	1	1	1	1	1	1	27	na	na	na	na
ERR11029134_NODE_10_curated_complete_319	52	0	0	0	0	0	0	0	0	0	0	0	1	1	1	1	1	1	1	1	1	1	1	1	1	1	1	1	1	1	1	1	1	1	1	1	1	1	1	27	na	na	na	na
ERR11029134_NODE_10_curated_complete_32	787	0	0	0	0	0	0	0	0	0	0	0	1	1	1	1	1	1	1	1	1	1	1	1	1	1	1	1	1	1	1	1	1	1	1	1	1	1	1	27	na	Mechanism of regulation of the Helicobacter pylori Cagbeta ATPase by CagZ	type IV secretion system component VirD4	VirD4
ERR11029134_NODE_10_curated_complete_320	656	0	0	0	0	0	0	0	0	0	0	0	1	1	1	1	2	1	1	1	1	1	1	1	1	1	1	1	1	1	1	1	1	1	1	1	1	1	1	27	AAA domain protein	Structure of RecG bound to three-way DNA junction	ATP-dependent DNA helicase RecG	ATP-dependent DNA helicase RecG
ERR11029134_NODE_10_curated_complete_321	131	0	0	0	0	0	0	0	0	0	0	0	1	1	1	1	1	1	1	1	1	1	1	1	1	1	1	1	1	1	1	1	1	1	1	1	1	1	1	27	Uncharacterized protein	CRYSTAL STRUCTURE OF A PUTATIVE LIPID BINDING PROTEIN (GSU0061) FROM GEOBACTER SULFURREDUCENS PCA AT 1.80 A RESOLUTION	CXXX repeat peptide modification system protein	na
ERR11029134_NODE_10_curated_complete_322	118	0	0	0	0	0	0	0	0	0	0	0	1	1	1	1	1	1	1	1	1	1	1	1	1	1	1	1	1	1	1	1	1	1	1	1	1	1	1	27	Uncharacterized protein	Crystal Structure of Talin Rod 482-655	hypothetical protein	na
ERR11029134_NODE_10_curated_complete_324	96	0	0	0	0	0	0	0	0	0	0	0	1	1	1	1	1	1	1	1	1	1	1	1	1	1	1	1	1	1	1	1	1	1	1	1	1	1	1	27	na	39S large subunit of the porcine mitochondrial ribosome	na	na
ERR11029134_NODE_10_curated_complete_33	384	0	0	0	0	0	0	0	0	0	0	0	1	1	1	1	1	1	1	1	1	1	1	1	1	1	1	1	1	1	1	1	1	1	1	1	1	1	1	27	na	na	na	na
ERR11029134_NODE_10_curated_complete_333	496	0	0	0	0	0	0	0	0	0	0	0	1	1	1	1	1	1	1	1	1	1	1	1	1	1	1	1	1	1	1	1	1	1	1	1	1	1	1	27	COG5527 Protein involved in initiation of plasmid replication	na	replication initiation protein RepE	Replication initial protein
ERR11029134_NODE_10_curated_complete_34	60	0	0	0	0	0	0	0	0	0	0	0	1	1	1	1	1	1	1	1	1	1	1	1	1	1	1	1	1	1	1	1	1	1	1	1	1	1	1	27	na	na	na	na
ERR11029134_NODE_10_curated_complete_344	177	0	0	0	0	0	0	0	0	0	0	0	1	1	1	1	1	1	1	1	1	1	1	1	1	1	1	1	1	1	1	1	1	1	1	1	1	1	1	27	Uncharacterized protein	Crystal structure of deoxyribonucleotidase-like protein (NP_764060.1) from Staphylococcus epidermidis ATCC 12228 at 1.55 A resolution	D-glycero-beta-D-manno-heptose 1,7-bisphosphate 7-phosphatase	na
ERR11029134_NODE_10_curated_complete_345	81	0	0	0	0	0	0	0	0	0	0	0	1	1	1	1	1	1	1	1	1	1	1	1	1	1	1	1	1	1	1	1	1	1	1	1	1	1	1	27	Phage protein	Complex structure of Methane monooxygenase hydroxylase in complex with inhibitory subunit	soluble methane monooxygenase-binding protein MmoD	na
ERR11029134_NODE_10_curated_complete_346	154	0	0	0	0	0	0	0	0	0	0	0	1	1	1	1	1	1	1	1	1	1	1	1	1	1	1	1	1	1	1	1	1	1	1	1	1	1	1	27	na	na	na	na
ERR11029134_NODE_10_curated_complete_35	128	0	0	0	0	0	0	0	0	0	0	0	1	1	1	1	1	1	1	1	1	1	1	1	1	1	1	1	1	1	1	1	1	1	1	1	1	1	1	27	Gp491	Crystal Structure of DR_1245 from Deinococcus radiodurans	type III secretion chaperone SycN	na
ERR11029134_NODE_10_curated_complete_350	408	0	0	0	0	0	0	0	0	0	0	0	1	1	1	1	1	1	1	1	1	1	1	1	1	1	1	1	1	1	1	1	1	1	1	1	1	1	1	27	Bacterial DnaG primase, TOPRIM domain	Crystal structure of the Bacillus subtilis DnaG RNA Polymerase Domain, natural degradation of full length DnaG	DNA primase-like protein	na
ERR11029134_NODE_10_curated_complete_351	386	0	0	0	0	0	0	0	0	0	0	0	1	1	1	1	1	1	1	1	1	1	1	2	1	1	1	1	1	1	1	1	1	1	1	1	1	1	1	27	DNA polymerase III subunit beta	Crystal structure of sliding DNA clamp of Clostridioides difficile	DNA polymerase III subunit beta	na
ERR11029134_NODE_10_curated_complete_352	338	0	0	0	0	0	0	0	0	0	0	0	1	1	1	1	1	1	1	1	1	1	1	1	1	1	1	1	1	1	1	1	1	1	1	1	1	1	1	27	Uncharacterized protein	na	na	na
ERR11029134_NODE_10_curated_complete_353	156	0	0	0	0	0	0	0	0	0	0	0	1	1	1	1	1	1	1	1	1	1	1	1	1	1	1	1	1	1	1	1	1	1	1	1	1	1	1	27	Gp171	Crystal structure of RNase H1 from halophilic archaeon Halobacterium salinarum NRC-1	ribonuclease HI	na
ERR11029134_NODE_10_curated_complete_354	100	0	0	0	0	0	0	0	0	0	0	0	1	1	1	1	1	1	1	1	1	1	1	1	1	1	1	1	1	1	1	1	1	1	1	1	1	1	1	27	na	na	na	na
ERR11029134_NODE_10_curated_complete_356	72	0	0	0	0	0	0	0	0	0	0	0	1	1	1	1	1	1	1	1	1	1	1	1	1	1	1	1	1	1	1	1	1	1	1	1	1	1	1	27	Uncharacterized protein	na	TIGR04165 family Cys-rich peptide	na
ERR11029134_NODE_10_curated_complete_357	101	0	0	0	0	0	0	0	0	0	0	0	1	1	1	1	1	1	1	1	1	1	1	1	1	1	1	1	1	1	1	1	1	1	1	1	1	1	1	27	Uncharacterized protein	na	na	na
ERR11029134_NODE_10_curated_complete_37	855	0	0	0	0	0	0	0	0	0	0	0	1	1	1	1	1	1	1	1	1	1	1	1	1	1	1	1	1	1	1	1	1	1	1	1	1	1	1	27	Gp155	TrwK/VirB4unbound dimer complex from R388 type IV secretion system determined by cryo-EM.	type IV secretion system protein TraC	VirB4
ERR11029134_NODE_10_curated_complete_38	197	0	0	0	0	0	0	0	0	0	0	0	1	1	1	1	1	1	1	1	1	1	1	1	1	1	1	1	1	1	1	1	1	1	1	1	1	1	1	27	na	na	MobC family replication-relaxation protein	na
ERR11029134_NODE_10_curated_complete_39	240	0	0	0	0	0	0	0	0	0	0	0	1	1	1	1	1	1	1	1	1	1	1	1	1	1	1	1	1	1	1	1	1	1	1	1	1	1	1	27	Uncharacterized protein	na	na	na
ERR11029134_NODE_10_curated_complete_40	419	0	0	0	0	0	0	0	0	0	0	0	1	1	1	1	1	1	1	1	1	1	1	1	1	1	1	1	1	1	1	1	1	1	1	1	1	1	1	27	na	na	na	na
ERR11029134_NODE_10_curated_complete_41	148	0	0	0	0	0	0	0	0	0	0	0	1	1	1	1	1	1	1	1	1	1	1	1	1	1	1	1	1	1	1	1	1	1	1	1	1	1	1	27	Bacterial PH domain protein	Crystal structure of a duf1696 family protein with a pleckstrin-homology domain (shew_0819) from shewanella loihica pv-4 at 2.00 A resolution	na	na
ERR11029134_NODE_10_curated_complete_42	324	0	0	0	0	0	0	0	0	0	0	0	1	1	1	1	1	1	1	1	1	1	1	1	1	1	1	1	1	1	1	1	1	1	1	1	1	1	1	27	Esterase	Crystal structure of ESTERASE B from Lactobacillus Rhamnosis (HN001)	acetyl esterase	na
ERR11029134_NODE_10_curated_complete_63	107	0	0	0	0	0	0	0	0	0	0	0	1	1	1	1	1	1	1	1	1	1	1	1	1	1	1	1	1	1	1	1	1	1	1	1	1	1	1	27	Uncharacterized protein	na	na	na
ERR11029134_NODE_10_curated_complete_75	213	0	0	0	0	0	0	0	0	0	0	0	1	1	1	1	1	1	1	1	1	1	1	1	1	1	1	1	1	1	1	1	1	1	1	1	1	1	1	27	Uncharacterized protein	na	na	na
ERR11029134_NODE_10_curated_complete_76	202	0	0	0	0	0	0	0	0	0	0	0	1	1	1	1	1	1	1	1	1	1	1	1	1	1	1	1	1	1	1	1	1	1	1	1	1	1	1	27	na	na	na	na
ERR11029134_NODE_10_curated_complete_77	255	0	0	0	0	0	0	0	0	0	0	0	1	1	1	1	1	1	1	1	1	1	1	1	1	1	1	1	1	1	1	1	1	1	1	1	1	1	1	27	na	na	na	na
ERR11029134_NODE_10_curated_complete_79	177	0	0	0	0	0	0	0	0	0	0	0	1	1	1	1	1	1	1	1	1	1	1	1	1	1	1	1	1	1	1	1	1	1	1	1	1	1	1	27	na	na	na	na
ERR11029134_NODE_10_curated_complete_81	287	0	0	0	0	0	0	0	0	0	0	0	1	1	1	1	1	1	1	1	1	1	1	1	1	1	1	1	2	1	1	1	1	1	1	1	1	1	1	27	HAD-superfamily phosphatase subfamily IIIC	X-ray Crystal Structure of the Hypothetical Phosphotyrosine Phosphatase MDP-1 of the Haloacid Dehalogenase Superfamily	magnesium-dependent phosphatase-1	na
ERR11029134_NODE_10_curated_complete_82	211	0	0	0	0	0	0	0	0	0	0	0	1	1	1	1	1	1	1	1	1	1	1	1	1	1	1	1	1	1	1	1	1	1	1	1	1	1	1	27	DNA repair protein	na	sce7726 family protein	na
ERR11029134_NODE_10_curated_complete_83	421	0	0	0	0	0	0	0	0	0	0	0	1	1	1	1	1	1	1	1	1	1	1	1	1	1	1	1	1	1	1	1	1	1	1	2	1	1	1	27	Tail tube protein	na	na	na
ERR11473358_NODE_44_curated_complete_238	216	0	0	0	0	0	0	0	0	0	0	0	1	1	1	1	1	1	1	1	1	1	1	1	1	1	1	1	1	1	1	1	1	1	1	1	1	1	1	27	na	na	na	na
ERR11473358_NODE_44_curated_complete_252	364	0	0	0	0	0	0	0	0	0	0	0	1	1	1	1	1	1	1	1	1	1	1	1	1	1	1	1	1	1	1	1	1	1	1	1	1	1	1	27	na	na	na	na
ERR11473358_NODE_44_curated_complete_262	244	0	0	0	0	0	0	0	0	0	0	0	2	1	1	1	1	1	2	1	1	1	1	1	1	1	1	1	1	1	1	1	1	1	1	1	1	1	1	27	na	na	na	na
ERR11473358_NODE_44_curated_complete_61	738	0	0	0	0	0	0	0	0	0	0	0	1	1	1	1	1	1	1	1	1	1	1	1	1	1	1	1	1	1	1	1	1	1	1	1	1	1	1	27	Putative superfamily II DEAD-like ATP-dependent RNA helicase	Crystal structure of T. fusca Cas3-AMPPNP	CRISPR-associated helicase/endonuclease Cas3	Cas3
ERR11473975_NODE_51_curated_circular_264	101	0	0	0	0	0	0	0	0	0	0	0	1	1	1	1	1	1	1	1	1	1	1	1	1	1	1	1	1	1	1	1	1	1	1	1	1	1	1	27	Uncharacterized protein	NMR solution structure of the De novo designed small beta-barrel protein 33_bp_sh3	na	na
ERR11475043_NODE_132_curated_complete_255	69	1	1	1	1	1	1	1	1	1	1	1	0	0	0	1	0	1	1	0	1	1	1	1	0	1	1	0	1	1	1	1	0	1	1	0	1	0	0	27	Restriction alleviation protein	na	na	na
ERR14838502_contig_1965_length_377046_start_adj_complete_249	230	0	0	0	0	0	0	0	0	0	0	0	1	1	1	1	1	1	1	1	1	1	1	1	1	1	1	1	1	1	1	1	1	1	1	1	1	1	1	27	na	na	na	the protein upstream of SecY - should be related as the best structure hit is 6WA9 - https://search.foldseek.com/result/-E0AF6TabKWsLOuM5eXiysedehZQqb2jkPt-aQ/0 and https://www.rcsb.org/structure/6WA9
ERR3450778_NODE_10_curated_final_136	201	0	0	0	0	0	0	0	0	0	0	0	1	1	1	1	1	1	1	1	1	1	1	1	1	1	1	1	1	1	1	1	1	1	1	1	1	1	1	27	HDc domain containing protein	na	integrating conjugative element relaxase, PFGI-1 class	HD nuclease/MOBH relaxase
ERR3450778_NODE_10_curated_final_249	209	0	0	0	0	0	0	0	0	0	0	0	2	2	1	3	1	2	2	1	1	2	1	1	2	1	1	2	1	1	1	1	2	1	2	2	1	2	2	27	na	na	na	na
ERR3450778_NODE_10_curated_final_253	353	0	0	0	0	0	0	0	0	0	0	0	1	1	1	1	1	1	1	1	1	1	1	1	1	1	1	1	1	1	1	1	1	1	1	1	1	1	1	27	na	na	na	na
ERR3450778_NODE_10_curated_final_69	300	0	0	0	0	0	0	0	0	0	0	0	1	1	1	1	1	1	1	1	1	1	1	1	1	1	1	1	1	1	1	1	1	1	1	1	1	1	1	27	DNA methylase domain protein	Crystal Structure of Methyltransferase MboIIa (Moraxella bovis)	adenine-specific DNA-methyltransferase	na
ERR4334199_NODE_10_curated_complete_210	74	1	2	1	1	1	1	1	1	1	1	1	1	1	0	1	1	1	1	0	0	1	0	1	1	1	0	1	0	0	1	0	1	1	0	1	1	0	0	27	na	na	na	na
ERR4341740_NODE_51_curated_complete_342	281	0	0	0	0	0	0	0	0	0	0	0	1	1	1	1	1	1	1	1	1	1	1	1	1	1	1	1	1	1	1	1	1	1	1	1	1	1	1	27	na	The Type III Crystal Structure of Streptococcus agalactiae Sortase C1	Bacterial Sortase Class E	class A sortase based on HP1554 gene structure comparison using online foldseek, BLASTp returns class D sortase though
ERR6395353_NODE_54_curated_final_227	364	0	0	0	0	0	0	0	0	0	0	0	1	1	1	1	1	1	1	1	1	1	1	1	1	1	1	1	1	1	1	1	1	1	1	1	1	1	1	27	na	na	na	na
huge_phage_1554_curated_complete_23	302	0	0	0	0	0	0	0	0	0	0	0	1	1	1	1	1	1	1	1	1	2	1	1	1	1	1	1	1	1	1	1	1	1	1	1	1	1	1	27	Serine/threonine protein phosphatase (EC 3.1.3.16)	BACTERIOPHAGE LAMBDA SER/THR PROTEIN PHOSPHATASE	protein-serine/threonine phosphatase	na
huge_phage_2979_curated_complete_170	266	0	0	0	0	0	0	0	0	0	0	0	1	1	1	1	1	1	1	1	1	1	1	1	1	1	1	1	1	1	1	1	1	1	1	2	1	1	1	27	na	na	na	na
huge_phage_2979_curated_complete_339	120	0	0	0	0	0	0	0	0	0	0	0	1	1	1	1	1	1	1	1	1	1	1	1	1	1	1	1	1	1	1	1	1	1	1	1	1	1	1	27	Uncharacterized protein	na	na	na
huge_phage_3584_curated_final_111	213	0	0	0	0	0	0	0	0	0	0	0	1	1	1	1	1	1	1	1	1	1	1	1	1	1	1	1	1	1	1	1	1	1	1	1	1	1	1	27	na	na	na	na
huge_phage_3584_curated_final_213	348	0	0	0	0	0	0	0	0	0	0	0	1	1	1	1	1	1	1	1	1	1	1	1	1	1	1	1	1	1	1	1	1	1	1	1	1	1	1	27	na	na	na	na
huge_phage_3584_curated_final_231	165	0	0	0	0	0	0	0	0	0	0	0	1	1	1	1	1	1	1	1	1	1	1	1	1	1	1	1	1	1	1	1	1	1	1	1	1	1	1	27	Uncharacterized protein	Crystal structure of a functionally unknown conserved protein from Corynebacterium diphtheriae.	DIP1984 family protein	na
huge_phage_3584_curated_final_252	290	0	0	0	0	0	0	0	0	0	0	0	1	2	1	1	1	1	1	1	1	1	1	1	1	1	1	1	1	1	1	1	1	1	1	1	1	1	1	27	na	na	na	na
huge_phage_3584_curated_final_256	316	0	0	0	0	0	0	0	0	0	0	0	1	1	1	1	1	1	1	1	1	1	1	1	1	1	1	1	1	1	1	1	1	1	1	1	1	1	1	27	GEWL-like protein	Thermodynamics and structure of a salmon cold-active goose-type lysozyme	na	na
huge_phage_3584_curated_final_266	896	0	0	0	0	0	0	0	0	0	0	0	1	1	1	1	1	1	1	1	1	1	1	1	1	1	1	1	1	1	1	1	1	1	1	1	1	1	1	27	na	na	na	vWA_norD_type + MSCRAMM_ClfA (sortase related?)
huge_phage_3584_curated_final_287	574	0	0	0	0	0	0	0	0	0	0	0	2	2	2	2	2	2	2	2	2	2	2	3	2	2	2	2	2	2	2	2	2	2	2	2	2	2	2	27	na	na	na	YkwD + Bacterial Ig-like domain protein
huge_phage_3584_curated_final_348	168	0	0	0	0	0	0	0	0	0	0	0	1	1	1	1	1	1	1	1	1	1	1	1	1	1	1	1	1	1	1	1	1	1	1	1	1	1	1	27	Mor transcription activator domain-containing protein	na	na	na
huge_phage_4378_curated_complete_147	257	0	0	0	0	0	0	0	0	0	0	0	1	1	1	1	1	1	1	1	1	1	1	1	1	1	1	1	1	1	1	1	1	1	1	1	1	1	1	27	Repressor domain protein	na	na	prophage antirepressor
huge_phage_4378_curated_complete_287	262	0	0	0	0	0	0	0	0	0	0	0	1	1	1	1	1	1	1	1	1	1	1	1	1	1	1	1	1	1	1	1	1	1	1	1	1	1	1	27	na	na	na	na
huge_phage_4380_curated_final_61	111	0	0	0	0	0	0	0	0	0	0	0	1	1	1	1	1	1	1	1	1	1	1	1	1	1	1	1	1	1	1	1	1	1	1	1	1	1	1	27	Uncharacterized protein	na	na	na
huge_phage_4400_curated_complete_119	718	0	0	0	0	0	0	0	0	0	0	0	1	1	1	1	1	1	2	1	1	1	1	1	1	1	1	1	1	1	1	1	1	1	1	1	1	1	1	27	DNA 3'-5' helicase (EC 5.6.2.4)	Crystal structure of UvrD-DNA-SO4 complex	DNA helicase PcrA	UvrD helicase (2IS1)
huge_phage_8498_curated_complete_243	166	0	0	0	0	0	0	0	0	0	0	0	1	1	1	1	1	1	1	1	1	1	1	1	1	1	1	1	1	1	1	1	1	1	1	1	1	1	1	27	na	na	na	na
SRR12101443_NODE_2_curated_complete_222	195	0	0	0	0	0	0	0	0	0	0	0	1	1	1	1	1	1	1	1	1	1	1	1	1	1	1	1	1	1	1	1	1	1	1	1	1	1	1	27	Peptidase S26 domain-containing protein	Structure and activity of Streptococcus pyogenes SipA: a signal peptidase homologue essential for pilus polymerisation	signal peptidase I	na
SRR13207761_NODE_54_curated_final_138	344	0	0	0	0	0	0	0	0	0	0	0	2	2	2	2	2	2	2	1	2	1	1	1	2	2	2	1	1	1	1	1	1	1	2	2	1	2	2	27	na	na	na	na
SRR13207761_NODE_54_curated_final_296	506	0	0	0	0	0	0	0	0	0	0	0	1	1	1	1	1	1	1	1	1	1	1	1	1	1	1	1	1	1	1	1	1	1	1	1	1	1	1	27	na	na	na	na
SRR21858778_NODE_12_curated_final_88	184	0	0	0	0	0	0	0	0	0	0	0	1	1	1	1	1	1	1	1	1	1	1	1	1	1	1	1	1	1	1	1	1	1	1	1	1	1	1	27	ASCH domain-containing protein	Crystal structure of ZmASCH S128A mutant protein from Zymomonas mobilis	50S ribosomal protein L22/unknown domain fusion protein	na
SRR6451797_NODE_81_curated_circular_30	362	0	0	0	0	0	0	0	0	0	0	0	1	1	1	1	1	1	1	1	1	1	1	1	1	1	1	1	1	1	1	1	1	1	1	1	1	1	1	27	Chromosome partitioning protein	Crystal structure of C-terminally truncated Geobacillus thermoleovorans nucleoid occlusion protein Noc	nucleoid occlusion protein	na
SRR7880223_NODE_5_curated_final_336	251	0	0	0	0	0	0	0	0	0	0	0	1	1	1	1	1	1	1	1	1	1	1	1	1	1	1	1	1	1	1	1	1	1	1	1	1	1	1	27	na	na	na	na
ERR11029134_NODE_10_curated_complete_133	131	0	0	0	0	0	0	0	0	0	0	0	1	1	1	1	1	1	1	1	1	1	1	1	1	1	1	1	1	0	1	1	1	1	1	1	1	1	1	26	Uncharacterized protein	Crystal Structure of Rv1846c, a Putative Transcriptional Regulatory Protein of Mycobacterium Tuberculosis	penicillinase repressor BlaI	na
ERR11029134_NODE_10_curated_complete_134	69	0	0	0	0	0	0	0	0	0	0	0	1	1	1	1	1	1	1	1	1	1	1	1	1	1	1	1	1	0	1	1	1	1	1	1	1	1	1	26	na	na	na	na
ERR11029134_NODE_10_curated_complete_142	124	0	0	0	0	0	0	0	0	0	0	0	1	1	1	1	1	1	1	1	1	1	1	1	1	1	1	1	1	1	1	1	1	1	1	1	1	0	1	26	na	na	na	na
ERR11029134_NODE_10_curated_complete_143	150	0	0	0	0	0	0	0	0	0	0	0	1	1	1	1	1	1	1	1	1	1	1	1	1	1	1	1	1	1	1	1	1	1	1	1	1	0	1	26	Uncharacterized protein	na	na	na
ERR11029134_NODE_10_curated_complete_144	151	0	0	0	0	0	0	0	0	0	0	0	1	1	1	1	1	1	1	1	1	1	1	1	1	1	1	1	1	1	1	1	1	1	1	1	1	0	1	26	na	na	na	na
ERR11029134_NODE_10_curated_complete_167	100	0	0	0	0	0	0	0	0	0	0	0	1	1	1	1	1	1	1	1	1	1	1	1	1	1	1	1	1	1	1	1	1	1	1	1	1	0	1	26	Phage protein	na	na	na
ERR11029134_NODE_10_curated_complete_177	254	0	0	0	0	0	0	0	0	0	0	0	1	1	1	1	1	1	0	1	1	1	1	1	1	1	1	1	1	1	1	1	1	1	1	1	1	1	1	26	YopX-like protein	Crystal structure of ORF041 from Bacteriophage 37	phage conserved hypothetical protein TIGR01671	na
ERR11029134_NODE_10_curated_complete_183	192	0	0	0	0	0	0	0	0	0	0	0	1	1	1	1	1	1	1	1	1	1	1	1	1	1	1	1	1	1	1	1	1	1	1	1	1	0	1	26	Uncharacterized protein	Crystal structure of deoxyribonucleotidase-like protein (NP_764060.1) from Staphylococcus epidermidis ATCC 12228 at 1.55 A resolution	HAD-IIIA family hydrolase	na
ERR11029134_NODE_10_curated_complete_191	164	0	0	0	0	0	0	0	0	0	0	0	1	1	1	1	1	1	1	1	1	1	1	1	1	1	1	1	1	1	1	1	1	1	1	1	1	0	1	26	Phage protein	na	na	na
ERR11029134_NODE_10_curated_complete_198	142	0	0	0	0	0	0	0	0	0	0	0	1	1	1	1	1	1	1	1	1	1	1	1	1	1	1	1	1	1	1	1	0	1	1	1	1	1	1	26	Uncharacterized protein	na	na	na
ERR11029134_NODE_10_curated_complete_247	183	0	0	0	0	0	0	0	0	0	0	0	1	1	0	1	1	1	1	1	1	1	1	1	1	1	1	1	1	1	1	1	1	1	1	1	1	1	1	26	Uncharacterized protein	na	na	na
ERR11029134_NODE_10_curated_complete_249	66	0	0	0	0	0	0	0	0	0	0	0	1	1	0	1	1	1	1	1	1	1	1	1	1	1	1	1	1	1	1	1	1	1	1	1	1	1	1	26	na	na	na	na
ERR11029134_NODE_10_curated_complete_250	247	0	0	0	0	0	0	0	0	0	0	0	1	1	0	1	1	1	1	1	1	1	1	1	1	1	1	1	1	1	1	1	1	1	1	1	1	1	1	26	na	na	na	na
ERR11029134_NODE_10_curated_complete_252	63	0	0	0	0	0	0	0	0	0	0	0	1	1	0	1	1	1	1	1	1	1	1	1	1	1	1	1	1	1	1	1	1	1	1	1	1	1	1	26	na	na	na	na
ERR11029134_NODE_10_curated_complete_253	266	0	0	0	0	0	0	0	0	0	0	0	1	1	0	1	1	1	1	1	1	1	1	1	1	1	1	1	1	1	1	1	1	1	1	1	1	1	1	26	YubB ferredoxin-like domain-containing protein	na	na	na
ERR11029134_NODE_10_curated_complete_259	103	0	0	1	0	0	0	0	0	0	0	0	1	1	0	1	1	1	1	1	1	1	1	1	1	1	1	1	1	1	1	1	1	1	1	1	1	1	0	26	Uncharacterized protein	De novo designed protein Foldit4	KEOPS complex subunit CTAG/PCC1	na
ERR11029134_NODE_10_curated_complete_266	358	0	0	0	0	0	0	0	0	0	0	0	1	1	0	1	1	1	1	1	1	1	1	1	1	1	1	1	1	1	1	1	1	1	1	1	1	1	1	26	na	na	na	na
ERR11029134_NODE_10_curated_complete_267	214	0	0	0	0	0	0	0	0	0	0	0	1	1	0	1	1	1	1	1	1	1	1	1	1	1	1	1	1	1	1	1	1	1	1	1	1	1	1	26	na	na	na	na
ERR11029134_NODE_10_curated_complete_274	119	0	0	0	0	0	0	0	0	0	0	0	1	1	1	1	1	1	1	1	1	1	1	1	1	1	1	1	1	1	1	1	1	1	1	1	1	1	0	26	Regulatory protein	Solution structure of the DNA binding domain of the repressor BlaI.	penicillinase repressor BlaI	na
ERR11029134_NODE_10_curated_complete_281	499	0	0	0	0	0	0	0	0	0	0	0	1	1	0	1	1	1	1	1	1	1	1	1	1	1	1	1	1	1	1	1	1	1	1	1	1	1	1	26	na	na	na	na
ERR11029134_NODE_10_curated_complete_284	555	0	0	0	0	0	0	0	0	0	0	0	1	1	1	1	1	1	1	1	1	1	1	1	1	1	1	1	1	1	1	1	1	1	1	0	1	1	1	26	TROVE domain-containing protein	Ro autoantigen complexed with RNAs	Ro 60 kDa domain-containing protein	na
ERR11029134_NODE_10_curated_complete_285	158	0	0	0	0	0	0	0	0	0	0	0	1	1	1	1	1	1	0	1	1	1	1	1	1	1	1	1	1	1	1	1	1	1	1	1	1	1	1	26	ATP-binding cassette domain of PrtD motif	FlaH from Sulfolobus acidocaldarius with ATP and Mg-Ion	KaiC domain protein, AF_0351 family	na
ERR11029134_NODE_10_curated_complete_290	47	0	0	0	0	0	0	0	0	0	0	0	1	1	1	1	1	1	1	1	1	1	1	1	1	1	1	1	1	1	0	1	1	1	1	1	1	1	1	26	na	na	na	na
ERR11029134_NODE_10_curated_complete_334	283	0	0	0	0	0	0	0	0	0	0	0	1	1	1	1	1	1	1	1	1	1	1	1	1	1	1	1	1	1	1	1	0	1	1	1	1	1	1	26	CobQ/CobB/MinD/ParA nucleotide binding domain protein	Structure of the bacterial chromosome segregation protein Soj	plasmid partitioning protein RepA	ParA
ERR11029134_NODE_10_curated_complete_335	433	0	0	0	0	0	0	0	0	0	0	0	1	1	1	1	1	1	1	1	1	1	1	1	1	1	1	1	1	1	1	1	0	1	1	1	1	1	1	26	Chromosome partitioning protein	na	nucleoid occlusion protein	ParB
ERR11029134_NODE_10_curated_complete_57	82	0	0	0	0	0	0	0	0	0	0	0	1	1	1	1	1	1	1	1	1	1	1	1	1	1	1	1	1	1	1	1	1	0	1	1	1	1	1	26	Uncharacterized protein	na	na	na
ERR11029134_NODE_10_curated_complete_61	627	0	0	0	0	0	0	0	0	0	0	0	1	1	1	1	1	1	1	1	1	1	1	1	1	1	1	1	1	1	1	1	1	0	1	1	1	1	1	26	na	na	na	na
ERR11029134_NODE_10_curated_complete_8	161	0	1	0	0	0	0	0	0	0	0	0	1	1	1	1	1	1	1	1	1	1	1	1	1	1	1	1	1	1	1	1	1	1	1	1	1	0	0	26	na	na	na	na
ERR11029134_NODE_10_curated_complete_84	289	0	0	0	0	0	0	0	0	0	0	0	1	1	1	1	1	1	1	1	1	1	1	1	1	1	1	1	1	1	1	1	1	1	0	1	1	1	1	26	na	na	na	na
ERR11473358_NODE_44_curated_complete_194	146	0	1	1	1	1	1	0	1	1	1	1	0	1	0	1	1	0	0	1	1	0	1	1	0	1	0	1	1	1	0	1	1	1	1	1	1	0	0	26	na	na	na	na
ERR11473358_NODE_44_curated_complete_236	170	0	0	0	0	0	0	0	0	0	0	0	1	1	1	1	1	1	1	1	1	1	1	1	1	1	1	1	1	1	1	1	0	1	1	1	1	1	1	26	Transcriptional regulator	Crystal structure of DndE from Escherichia coli B7A involved in DNA phosphorothioation modification	conjugal transfer protein TraY	na
ERR11566171_NODE_22_curated_complete_161	279	0	0	0	0	0	0	0	0	0	0	0	0	1	1	1	1	1	1	1	1	1	1	1	1	1	1	1	1	1	1	1	1	1	1	1	1	1	1	26	na	na	na	na
ERR11566171_NODE_22_curated_complete_171	286	0	0	0	0	0	0	0	0	0	0	0	1	1	1	1	1	1	1	1	1	1	1	1	1	1	1	1	1	1	1	1	1	1	1	0	1	1	1	26	na	na	na	na
ERR14838502_contig_1965_length_377046_start_adj_complete_373	205	0	0	0	0	0	0	0	0	0	0	0	1	1	1	1	1	0	1	1	1	1	1	1	1	1	1	1	1	1	1	1	1	1	1	1	1	1	1	26	Uncharacterized protein	na	na	na
ERR14838502_contig_1965_length_377046_start_adj_complete_66	172	0	0	0	0	0	0	0	0	0	0	0	1	1	1	1	1	1	1	1	1	1	1	1	1	1	1	1	1	1	1	1	1	1	0	1	1	1	1	26	na	na	na	na
ERR3450778_NODE_10_curated_final_246	354	0	0	1	0	0	0	0	0	0	0	0	1	1	1	1	1	1	1	1	1	0	1	1	1	1	1	1	1	1	1	1	1	1	1	1	1	1	0	26	na	na	na	na
ERR3450778_NODE_10_curated_final_80	281	0	0	0	0	0	0	0	0	0	0	0	1	1	1	1	1	1	1	1	1	1	1	1	1	1	1	1	1	1	1	1	1	1	1	1	1	1	0	26	FAD-dependent thymidylate synthase	Crystal structure of Mycobacterium tuberculosis thymidylate synthase X bound to FdUMP and FAD	FAD-dependent thymidylate synthase	na
ERR9250082_NODE_7_curated_complete_53	149	0	0	0	0	0	0	0	0	0	0	0	1	1	1	1	1	1	1	1	1	1	1	1	1	1	1	1	1	1	1	1	0	1	1	1	1	1	1	26	na	na	na	na
huge_phage_2979_curated_complete_108	146	0	0	0	0	0	0	0	0	0	0	0	1	1	1	1	1	1	1	1	1	1	1	0	1	1	1	1	1	1	1	1	1	1	1	1	1	1	1	26	Uncharacterized protein	The crystal structure of hemagglutinin from 1968 H3N2 influenza virus	exodeoxyribonuclease VII small subunit	na
huge_phage_3742_curated_complete_206	839	0	0	0	0	0	0	0	0	0	0	0	1	1	1	1	1	1	1	1	1	1	1	1	1	1	1	1	1	0	1	1	1	1	1	1	1	1	1	26	UvrD-like helicase C-terminal domain-containing protein	Crystal structure of the ternary complex of RecD2 with DNA and ADPNP	ATP-dependent RecD-like DNA helicase	na
huge_phage_4378_curated_complete_241	257	0	0	0	0	0	0	0	0	0	0	0	1	1	1	1	1	1	1	1	1	1	1	1	1	1	1	1	1	1	0	1	1	1	1	1	1	1	1	26	(P)ppGpp synthetase, RelA/SpoT family	Crystal structure of a (p)ppApp hydrolase from Bacteroides caccae	na	na
huge_phage_4378_curated_complete_326	136	0	0	0	0	0	0	0	0	0	0	0	1	1	1	1	1	1	1	1	0	1	1	1	1	1	1	1	1	1	1	1	1	1	1	1	1	1	1	26	na	na	na	na
huge_phage_4380_curated_final_28	335	0	0	0	0	0	0	0	0	0	0	0	1	1	1	1	1	1	1	1	1	1	1	1	1	1	1	1	1	1	1	1	1	1	1	1	1	0	1	26	na	na	na	na
huge_phage_8498_curated_complete_233	151	0	0	0	0	0	0	0	0	0	0	0	1	1	1	1	1	1	1	1	1	1	1	1	1	1	1	1	1	1	1	1	1	1	1	1	1	0	1	26	na	na	na	na
huge_phage_8550_curated_final_53	467	0	0	0	0	0	0	0	0	0	0	0	1	1	1	1	1	1	0	1	1	1	1	1	1	1	1	1	1	1	1	1	1	1	1	1	1	1	1	26	na	na	na	na
ERR11029134_NODE_10_curated_complete_129	137	0	0	0	0	0	0	0	0	0	0	0	1	1	1	1	1	1	1	1	1	1	1	1	1	1	1	1	1	1	1	1	1	1	1	1	1	0	0	25	na	na	na	na
ERR11029134_NODE_10_curated_complete_151	458	0	0	0	0	0	0	0	0	0	0	0	1	1	1	1	1	1	1	1	0	1	1	1	1	1	1	1	1	1	1	1	1	1	0	1	1	1	1	25	Poly-A polymerase	Structure of a psychrophilic CCA-adding enzyme crystallized in the XtalController device	CCA tRNA nucleotidyltransferase	na
ERR11029134_NODE_10_curated_complete_168	238	0	0	0	0	0	0	0	0	0	0	0	1	1	1	1	1	1	1	1	1	1	1	1	1	1	1	0	1	1	1	1	1	1	1	1	1	0	1	25	na	na	na	na
ERR11029134_NODE_10_curated_complete_169	205	0	0	0	0	0	0	0	0	0	0	0	1	1	1	1	1	1	1	1	1	1	1	1	1	1	1	0	1	1	1	1	1	1	1	1	1	0	1	25	na	na	na	na
ERR11029134_NODE_10_curated_complete_170	259	0	0	0	0	0	0	0	0	0	0	0	1	1	1	1	1	1	1	1	1	1	1	1	1	1	1	0	1	1	1	1	1	1	1	1	1	0	1	25	GmrSD restriction endonucleases N-terminal domain-containing protein	na	DGQHR domain	na
ERR11029134_NODE_10_curated_complete_181	164	1	0	0	1	1	0	0	0	1	1	0	1	0	0	1	1	0	1	1	1	1	1	1	1	1	1	1	1	0	1	1	1	1	1	0	1	0	0	25	Uncharacterized protein	na	na	na
ERR11029134_NODE_10_curated_complete_184	116	0	1	1	0	0	0	1	0	0	0	0	1	1	1	1	1	1	1	0	1	1	0	1	1	1	1	1	1	1	0	0	1	1	1	1	1	0	1	25	Uncharacterized protein	na	na	na
ERR11029134_NODE_10_curated_complete_189	112	0	1	1	0	0	0	0	0	0	0	0	1	1	1	1	1	1	1	1	1	1	1	1	0	1	1	0	1	1	1	1	1	1	1	0	1	0	1	25	Uncharacterized protein	na	na	na
ERR11029134_NODE_10_curated_complete_262	147	0	0	0	0	0	0	0	0	0	0	0	1	1	0	1	1	1	1	1	1	1	1	1	1	1	1	1	1	1	1	1	1	1	1	1	1	1	0	25	na	na	na	na
ERR11029134_NODE_10_curated_complete_263	99	0	0	0	0	0	0	0	0	0	0	0	1	1	0	1	1	1	1	1	1	1	1	1	1	1	1	1	1	1	1	1	1	1	1	1	1	1	0	25	Phage protein	na	na	na
ERR11029134_NODE_10_curated_complete_264	160	0	0	0	0	0	0	0	0	0	0	0	1	1	0	1	1	1	1	1	1	1	1	1	1	1	1	1	1	1	1	1	1	1	1	1	1	1	0	25	Putative deoxycytidylate deaminase (EC 3.5.4.12)	Human dCMP deaminase	ComE operon protein 2	na
ERR11029134_NODE_10_curated_complete_265	119	0	0	0	0	0	0	0	0	0	0	0	1	1	0	1	1	1	1	1	1	1	1	1	1	1	1	1	1	1	1	1	1	1	1	1	1	1	0	25	Uncharacterized protein	na	na	na
ERR11029134_NODE_10_curated_complete_282	662	0	0	0	0	0	0	0	0	0	0	0	1	1	0	1	1	1	1	1	1	1	1	1	1	2	1	1	1	1	1	1	1	1	1	0	1	1	2	25	na	na	na	na
ERR11029134_NODE_10_curated_complete_293	51	0	0	0	0	0	0	0	0	0	0	0	1	1	1	1	1	1	0	1	1	1	1	1	1	1	1	1	1	1	0	1	1	1	1	1	1	1	1	25	na	na	na	na
ERR11029134_NODE_10_curated_complete_3	79	0	0	0	0	0	0	0	0	0	0	0	1	1	1	1	1	1	1	1	1	1	1	1	1	1	1	1	1	1	1	1	1	1	1	1	1	0	0	25	Uncharacterized protein	na	na	na
ERR11029134_NODE_10_curated_complete_327	128	0	0	0	0	0	0	0	0	0	0	0	1	1	1	1	1	1	1	1	1	1	1	1	1	1	1	1	0	0	1	1	1	1	1	1	1	1	1	25	na	na	na	na
ERR11029134_NODE_10_curated_complete_60	126	1	1	1	1	1	1	1	1	1	1	1	1	0	1	0	1	1	1	0	1	1	0	1	1	0	0	0	1	0	0	1	1	0	1	0	0	0	1	25	Uncharacterized protein	Crystal structure of the quinone-bound YodB from B. subtilis	Rv2640c family ArsR-like transcriptional regulator	na
ERR11029134_NODE_10_curated_complete_7	140	0	0	0	0	0	0	0	0	0	0	0	1	1	1	1	1	1	1	1	1	1	1	1	1	1	1	1	1	1	1	1	1	1	1	1	1	0	0	25	na	na	na	na
ERR11473358_NODE_44_curated_complete_347	206	0	0	0	0	0	0	0	0	0	0	0	0	1	1	1	1	1	1	1	1	1	1	1	1	1	1	1	1	1	1	1	1	1	0	1	1	1	1	25	Calcineurin-like phosphoesterase domain-containing protein	The Crystal Structure of the Protein of Unknown Function AQ665 from Aquifex aeolicus	phosphodiesterase	na
ERR11473358_NODE_44_curated_complete_53	193	0	0	0	0	0	0	0	0	0	0	0	1	1	1	1	1	1	1	1	0	1	1	1	1	1	1	1	1	1	1	1	1	1	0	1	1	1	1	25	na	na	na	na
ERR11473975_NODE_51_curated_circular_2	300	0	0	0	0	0	0	0	0	0	0	0	1	1	1	1	1	1	1	1	1	1	1	1	1	1	1	1	0	0	1	1	1	1	1	1	1	1	1	25	na	na	na	na
ERR11473975_NODE_51_curated_circular_3	324	0	0	0	0	0	0	0	0	0	0	0	1	1	1	1	1	1	1	1	1	1	1	1	1	1	1	1	0	0	1	1	1	1	1	1	1	1	1	25	IstB-like ATP-binding domain-containing protein	E. coli DnaBC complex bound to ssDNA	ATP-binding protein	na
ERR6395353_NODE_54_curated_final_37	132	0	0	0	0	0	0	0	0	0	0	0	1	1	1	1	1	1	1	1	1	1	0	1	1	1	1	1	1	1	1	1	1	1	1	0	1	1	1	25	Uncharacterized protein	X-RAY STRUCTURE OF PUTATIVE HISTIDINE-CONTAINING PHOSPHOTRANSFER PROTEIN FROM RICE, AK104879	Quorum sensing phosphorelay intermediate	na
huge_phage_1888_curated_final_60	153	0	0	0	0	0	0	0	0	0	0	0	1	1	1	1	1	1	1	1	1	1	1	1	1	1	1	1	0	0	1	1	1	1	1	1	1	1	1	25	Uncharacterized protein	na	na	na
SRR21858778_NODE_12_curated_final_192	164	0	0	0	0	0	0	0	0	0	0	0	1	1	0	1	1	1	1	1	1	1	1	1	1	1	1	1	1	1	1	1	1	1	1	1	1	1	0	25	Uncharacterized protein	Structure of macrodomain protein from Streptomyces coelicolor	ADP-ribose-binding protein	na
ERR11029134_NODE_10_curated_complete_101	95	0	0	0	0	0	0	0	0	0	0	0	1	1	1	1	1	1	1	1	0	1	1	1	1	1	1	1	1	1	1	1	1	1	0	1	1	1	0	24	Uncharacterized protein	Cryo-EM Structure of T. kodakarensis 70S ribosome	50S ribosomal protein L18Ae	na
ERR11029134_NODE_10_curated_complete_171	317	0	0	0	0	0	0	0	0	0	0	0	1	1	1	1	1	1	0	1	1	1	1	1	1	1	1	0	1	1	1	1	1	1	1	1	1	0	1	24	Coil containing protein	na	na	na
ERR11029134_NODE_10_curated_complete_187	301	0	0	0	0	0	0	0	0	0	0	0	1	1	1	1	1	1	1	1	1	1	1	0	1	1	1	1	0	0	1	1	1	1	1	1	1	1	1	24	na	na	na	na
ERR11029134_NODE_10_curated_complete_193	107	0	0	0	0	0	0	0	0	0	0	0	1	1	1	1	1	0	1	1	1	1	1	1	0	1	1	1	1	1	1	1	0	1	1	1	1	1	1	24	na	na	na	na
ERR11029134_NODE_10_curated_complete_78	183	0	0	0	0	0	0	0	0	0	0	0	1	1	0	1	1	1	1	1	1	1	1	1	1	1	1	1	1	1	1	1	1	1	0	0	1	1	1	24	DNMP kinase	Initial crystal structural analysis of a probable kinase from Leishmania major Friedlin	hypothetical protein	na
ERR11029134_NODE_10_curated_complete_94	78	0	0	0	0	0	0	0	0	0	0	0	1	1	1	1	1	1	1	1	0	1	1	1	1	1	1	1	1	1	1	1	1	1	0	1	1	1	0	24	Transmembrane protein	Yeast VO in complex with Vma21p	4-amino-4-deoxy-L-arabinose-phosphoundecaprenol flippase subunit ArnE	na
ERR11473358_NODE_44_curated_complete_160	342	0	0	0	0	0	0	0	0	0	0	0	1	1	0	1	1	1	1	1	1	1	1	1	1	1	1	1	1	1	1	1	1	1	1	0	1	1	0	24	na	na	na	na
ERR14838502_contig_1965_length_377046_start_adj_complete_316	99	0	0	0	0	0	0	0	0	0	0	0	1	1	1	1	1	1	1	1	1	1	1	1	1	0	1	1	1	1	1	1	1	1	1	1	1	0	0	24	na	na	na	na
ERR14838502_contig_1965_length_377046_start_adj_complete_43	172	0	0	0	0	0	0	0	0	0	0	0	0	0	1	1	1	1	1	1	1	1	1	1	1	1	1	1	1	1	1	1	1	1	1	0	1	1	1	24	na	na	na	na
ERR14838502_contig_1965_length_377046_start_adj_complete_72	159	0	0	0	0	0	0	0	0	0	0	0	1	1	1	1	1	1	1	1	0	1	1	1	1	1	1	1	1	1	1	1	1	1	0	1	1	1	0	24	ASCH domain-containing protein	Crystal structure of ZmASCH S128A mutant protein from Zymomonas mobilis	N(4)-acetylcytidine aminohydrolase	na
ERR14838502_contig_1965_length_377046_start_adj_complete_92	189	0	1	0	0	0	0	0	0	0	0	0	1	1	0	1	1	1	1	1	0	1	1	1	1	1	1	1	1	1	1	1	1	1	0	1	1	1	0	24	Uncharacterized protein	na	na	na
huge_phage_8550_curated_final_33	307	0	0	0	0	0	0	0	0	0	0	0	1	1	1	1	1	1	1	1	0	1	1	1	1	1	1	1	1	1	1	1	1	1	0	1	1	1	0	24	CYFA0S28e00188g1_1	Structural basis for targeted p97 remodelling by ASPL as prerequisite for p97 trimethylation by METTL21D	Cell division protein CdvC	na
NZ_DXPE01000001_curated_complete_314	128	0	0	0	0	0	0	0	0	0	0	0	1	1	1	1	1	1	1	1	0	1	1	1	1	1	1	1	1	1	1	1	1	1	0	1	1	1	0	24	Uncharacterized protein	na	na	na
ERR11029134_NODE_10_curated_complete_110	327	0	0	0	0	0	0	0	0	0	0	0	1	1	0	1	1	1	1	1	0	1	1	1	1	1	1	1	1	1	1	1	1	1	0	1	1	1	0	23	Lipase/esterase	Crystal structure of a C4-C4 SN3 tributyrin phosphonate inhibited by ESTERASE B from LACTOBACILLUS RHAMNOSIS	acetyl esterase	na
ERR11029134_NODE_10_curated_complete_117	172	0	0	0	0	0	0	0	0	0	0	0	1	1	0	1	1	1	1	1	0	1	1	1	1	1	1	1	1	1	1	1	1	1	0	1	1	1	0	23	Dual specificity phosphatase, catalytic domain containing protein	Crystal Structure of PTPMT1 in complex with PI(5)P	na	na
ERR11029134_NODE_10_curated_complete_120	256	0	0	0	0	0	0	0	0	0	0	0	1	1	0	1	1	1	1	1	0	1	1	1	1	1	1	1	1	1	1	1	1	1	0	1	1	1	0	23	na	na	na	na
ERR11029134_NODE_10_curated_complete_121	217	0	0	0	0	0	0	0	0	0	0	0	1	1	0	1	1	1	1	1	0	1	1	1	1	1	1	1	1	1	1	1	1	1	1	1	1	0	0	23	na	na	na	na
ERR11029134_NODE_10_curated_complete_122	67	0	0	0	0	0	0	0	0	0	0	0	1	1	0	1	1	1	1	1	0	1	1	1	1	1	1	1	1	1	1	1	1	1	1	1	1	0	0	23	Uncharacterized protein	na	na	na
ERR11029134_NODE_10_curated_complete_123	149	0	0	0	0	0	0	0	0	0	0	0	1	1	0	1	1	1	1	1	0	1	1	1	1	1	1	1	1	1	1	1	1	1	1	1	1	0	0	23	Uncharacterized protein	na	na	na
ERR11029134_NODE_10_curated_complete_176	87	0	0	0	0	0	0	0	0	0	0	0	1	1	1	1	1	1	0	1	1	1	0	1	1	1	1	0	1	1	0	1	1	1	1	1	1	1	1	23	na	na	na	na
ERR11029134_NODE_10_curated_complete_48	142	0	0	0	0	0	0	0	0	0	0	0	1	1	1	1	1	1	1	1	1	1	1	0	1	1	0	1	0	0	1	1	1	1	1	1	1	1	1	23	NS4 protein	Structure of the 48-nm repeat doublet microtubule from bovine tracheal cilia	SPI-1 type III secretion system protein SpaM	na
ERR11029134_NODE_10_curated_complete_49	336	0	0	0	0	0	0	0	0	0	0	0	1	1	1	1	1	1	1	1	1	1	1	0	1	1	0	1	0	0	1	1	1	1	1	1	1	1	1	23	na	na	na	na
ERR11029134_NODE_10_curated_complete_86	97	0	0	0	0	0	0	0	0	0	0	0	1	0	1	1	1	1	1	1	1	1	1	1	1	1	1	1	1	1	1	1	1	1	0	1	0	0	1	23	Uncharacterized protein	na	na	na
ERR9250082_NODE_7_curated_complete_312	244	0	0	0	0	0	0	0	0	0	0	0	1	1	0	1	1	1	1	1	0	1	1	1	1	1	1	1	1	1	1	1	1	1	0	1	1	1	0	23	Endonuclease subunit	Crystal Structure of Cold-Active Protein-Tyrosine Phosphatase of a Psychrophile Shewanella SP.	symmetrical bis(5'-nucleosyl)-tetraphosphatase	na
ERR11029134_NODE_10_curated_complete_115	202	0	0	0	0	0	0	0	0	0	0	0	1	1	0	1	1	1	1	1	0	1	1	1	1	1	0	1	1	1	1	1	1	1	0	1	1	1	0	22	na	na	na	na
ERR11029134_NODE_10_curated_complete_116	174	0	0	0	0	0	0	0	0	0	0	0	1	1	0	1	1	1	1	1	0	1	1	1	1	1	0	1	1	1	1	1	1	1	0	1	1	1	0	22	na	na	na	na
ERR11029134_NODE_10_curated_complete_205	55	1	0	0	1	0	0	0	0	0	1	0	1	1	1	1	1	1	1	0	1	1	0	0	1	0	0	0	0	1	1	1	1	1	0	1	1	1	1	22	na	na	na	na
ERR11029134_NODE_10_curated_complete_287	67	0	0	0	0	0	0	0	0	0	0	0	1	1	1	1	1	1	1	1	1	1	1	0	1	0	1	1	0	0	1	1	1	1	1	0	1	1	1	22	Uncharacterized protein	Complex III2 from Candida albicans, inhibitor free, Rieske head domain in b position	na	na
ERR11029134_NODE_10_curated_complete_289	61	0	0	0	0	0	0	0	0	0	0	0	1	1	1	1	1	1	1	1	1	1	1	0	1	0	1	1	0	0	0	1	1	1	1	1	1	1	1	22	Uncharacterized protein	na	na	na
ERR11029134_NODE_10_curated_complete_90	111	0	0	0	0	0	0	0	0	0	0	0	1	1	1	1	1	1	1	1	0	1	1	1	1	0	1	1	1	0	1	1	1	1	0	1	1	1	0	22	Uncharacterized protein	na	soluble methane monooxygenase-binding protein MmoD	na
huge_phage_3334_curated_complete_104	516	0	1	0	3	2	3	3	2	2	2	2	0	1	1	0	0	1	1	0	0	0	0	2	1	1	1	0	1	1	0	0	0	0	0	1	1	1	0	22	na	IscB and wRNA bound to Target DNA	RNA-guided endonuclease IscB	na
huge_phage_4378_curated_complete_328	490	1	1	1	1	1	1	1	1	1	1	1	1	1	0	0	0	0	0	1	0	0	1	1	0	1	0	1	1	1	0	0	1	0	0	1	0	0	0	22	na	Crystal structure of BtubC (BKLC) from P. vanneervenii	social motility TPR repeat lipoprotein Tgl	na
huge_phage_8550_curated_final_251	223	0	0	0	0	0	0	0	0	0	0	0	1	0	1	1	1	1	1	1	0	1	0	0	1	1	1	1	0	1	1	1	1	1	1	1	1	1	1	22	Double-stranded RNA binding motif-containing protein	na	TIGR00288 family NYN domain-containing protein	na
ERR11029134_NODE_10_curated_complete_199	181	0	0	0	0	0	0	0	0	0	0	0	1	0	1	1	1	1	1	1	1	1	1	0	1	0	1	1	0	0	1	1	0	1	1	1	1	1	1	21	na	na	na	na
huge_phage_4378_curated_complete_77	390	0	0	0	0	0	0	0	0	0	0	0	0	3	1	1	2	2	1	1	0	0	2	2	0	2	1	0	1	2	0	2	2	2	2	2	1	1	2	21	Transposase-like protein	Cryo-EM structure of the AsCas12f-sgRNA-target DNA ternary complex	RNA-guided endonuclease TnpB family protein	na
ERR11029134_NODE_10_curated_complete_127	63	0	0	0	1	0	0	1	0	0	0	1	1	1	0	0	1	1	1	0	0	0	1	1	1	1	1	1	1	1	0	1	1	0	1	1	0	0	0	20	Uncharacterized protein	Cryo-EM structure of a Chaetomium thermophilum pre-60S ribosomal subunit - State Puf6	HVO_2142 family zinc finger protein	na
ERR11029134_NODE_10_curated_complete_72	362	1	1	0	0	0	1	1	0	0	0	0	1	0	0	1	1	0	1	1	1	1	1	1	0	0	1	1	0	0	1	1	0	1	1	0	1	0	0	20	Nucleotidyltransferase	na	na	na
ERR11029134_NODE_10_curated_complete_251	114	0	0	0	0	0	0	0	0	0	0	0	1	1	0	1	1	1	0	1	1	1	0	0	1	1	1	0	0	0	1	1	1	1	1	1	1	0	1	19	Uncharacterized protein	na	na	na
ERR11029134_NODE_10_curated_complete_261	62	0	0	0	0	0	0	0	0	0	0	0	1	0	0	1	1	1	1	1	1	0	1	1	1	1	0	0	1	1	1	1	1	0	1	0	1	1	0	19	Uncharacterized protein	na	na	na
ERR11029134_NODE_10_curated_complete_328	79	0	0	0	0	0	0	0	0	0	0	0	1	1	1	1	0	0	1	1	1	1	1	0	1	1	0	1	0	0	1	1	1	1	1	0	1	1	0	19	Uncharacterized protein	Cryo-EM structure of a human post-catalytic spliceosome (P complex) at 3.0 angstrom	Rho-binding antiterminator	na
ERR11029134_NODE_10_curated_complete_329	78	0	0	0	0	0	0	0	0	0	0	0	1	1	1	1	0	0	1	1	1	1	1	0	1	1	0	1	0	0	1	1	1	1	1	0	1	1	0	19	Uncharacterized protein	Crystal structure of Rhodospirillum rubrum Rru_A0973 mutant E32A, E62A, H65A.	exodeoxyribonuclease VII small subunit	na
ERR11029134_NODE_10_curated_complete_5	222	0	0	0	0	0	0	0	0	0	0	0	1	1	1	0	0	1	1	1	0	1	1	1	1	0	0	1	1	1	1	1	1	1	0	1	1	0	0	19	na	na	na	na
ERR11473358_NODE_44_curated_complete_27	134	0	0	0	1	1	1	0	0	1	0	1	0	2	0	1	0	1	1	0	4	0	1	0	1	1	0	1	0	0	0	0	0	1	0	0	1	1	1	18	Uncharacterized protein	Crystal structure of IS200 transposase	IS200/IS605 family transposase	na
ERR11473358_NODE_44_curated_complete_28	579	0	0	0	1	1	1	0	0	1	0	1	0	2	0	1	0	1	1	0	4	0	1	0	1	1	0	1	0	0	0	0	0	2	0	0	1	1	1	18	Transposase	Cryo-EM structure of the TnpB-omegaRNA-target DNA ternary complex	RNA-guided DNA endonuclease TnpB-like	na
ERR11473358_NODE_44_curated_complete_330	313	0	0	0	0	0	0	0	0	0	0	0	0	1	1	0	0	1	0	0	0	0	1	1	1	0	0	1	1	1	1	1	1	1	1	1	1	1	1	18	na	na	na	na
ERR11473358_NODE_44_curated_complete_345	65	0	0	0	0	0	0	0	0	0	0	0	0	1	1	1	1	1	1	0	1	1	0	1	1	1	0	0	1	1	0	0	1	0	0	1	1	1	1	18	Uncharacterized protein	na	na	na
ERR14838502_contig_1965_length_377046_start_adj_complete_11	607	0	0	1	1	0	0	1	0	0	2	0	0	1	0	1	1	0	0	0	0	0	0	1	1	0	1	0	1	1	1	1	0	0	0	1	1	1	2	18	site-specific DNA-methyltransferase (adenine-specific) (EC 2.1.1.72)	Crystal structure of Type I restriction enzyme StySJI M protein (NP_813429.1) from Bacteroides thetaiotaomicron VPI-5482 at 2.20 A resolution	type I restriction-modification system subunit M	na
huge_phage_2159_curated_complete_371	332	0	0	1	1	0	0	0	0	0	0	1	0	0	0	1	1	0	0	1	1	0	1	1	0	1	1	0	1	1	1	1	0	1	1	0	1	0	0	18	na	na	na	na
huge_phage_4378_curated_complete_359	203	1	1	1	1	1	0	1	1	1	1	1	0	0	0	0	0	0	0	0	0	0	0	1	0	1	0	0	1	1	1	1	0	0	1	0	1	0	0	18	na	na	na	na
ERR11029134_NODE_10_curated_complete_154	139	0	0	0	0	0	0	0	0	0	0	0	1	1	1	1	1	1	0	0	0	1	0	1	1	1	0	1	1	1	0	0	1	0	0	1	0	1	1	17	na	na	na	na
ERR11029134_NODE_10_curated_complete_155	347	0	0	0	0	0	0	0	0	0	0	0	1	1	1	1	1	1	0	0	0	1	0	1	1	1	0	1	1	1	0	0	1	0	0	1	0	1	1	17	Nucleotidyltransferase	na	na	na
ERR11029134_NODE_10_curated_complete_156	235	0	0	0	0	0	0	0	0	0	0	0	1	1	1	1	1	1	0	0	0	1	0	1	1	1	0	1	1	1	0	0	1	0	0	1	0	1	1	17	na	na	na	na
ERR11029134_NODE_10_curated_complete_58	64	0	0	0	0	0	0	0	0	0	0	0	1	1	0	1	1	0	0	1	1	0	1	0	1	1	1	0	0	1	0	1	1	0	1	1	1	0	1	17	Uncharacterized protein	na	na	na
ERR11473358_NODE_44_curated_complete_111	426	0	0	0	0	0	0	0	0	0	0	0	1	1	1	1	1	1	0	1	0	1	0	0	1	1	0	1	0	0	1	0	0	1	0	1	1	1	1	17	BIG2 domain-containing protein	na	na	na
ERR14838502_contig_1965_length_377046_start_adj_complete_380	78	1	1	1	1	1	1	1	1	1	1	1	0	0	0	1	1	0	0	0	1	0	0	0	0	1	1	0	0	0	0	0	0	0	1	0	0	0	0	17	Uncharacterized protein	na	na	na
huge_phage_2159_curated_complete_370	338	0	0	1	0	0	0	0	0	0	0	1	0	0	0	1	1	0	0	1	1	0	1	1	0	1	1	0	1	1	1	1	0	1	1	0	1	0	0	17	na	na	na	na
ERR11029134_NODE_10_curated_complete_186	60	0	0	0	0	0	0	0	0	0	0	0	1	0	0	1	1	1	1	1	1	1	1	0	1	1	1	0	0	0	1	1	1	0	1	0	0	0	0	16	na	na	na	na
ERR11029134_NODE_10_curated_complete_22	79	1	1	0	1	1	1	1	1	1	1	1	1	0	0	0	0	0	0	0	0	0	0	1	0	0	0	0	0	1	1	0	0	1	0	1	0	0	0	16	Uncharacterized protein	Body domain of the mt-SSU assemblosome from Trypanosoma brucei	na	na
ERR11029134_NODE_10_curated_complete_27	379	0	0	0	0	1	1	0	1	1	0	1	1	1	0	0	1	1	0	0	0	1	0	0	0	1	0	1	0	0	0	0	1	0	1	0	0	1	1	16	GmrSD restriction endonucleases N-terminal domain-containing protein	na	na	na
ERR11029134_NODE_10_curated_complete_59	722	0	0	0	0	0	0	0	0	0	0	0	1	1	1	1	1	1	1	1	1	1	1	1	0	0	0	1	1	1	0	0	0	0	0	0	0	0	1	16	na	na	na	na
ERR11473358_NODE_44_curated_complete_103	292	1	1	1	1	1	1	1	1	1	1	1	0	1	0	0	0	0	0	0	0	0	0	1	0	1	0	0	1	1	0	0	0	0	0	0	0	0	0	16	na	na	na	na
huge_phage_1554_curated_complete_378	103	0	0	0	0	0	0	0	0	0	0	0	1	0	0	1	1	1	1	0	1	0	0	2	1	1	0	1	1	1	1	0	0	1	0	1	0	1	0	16	Uncharacterized protein	na	na	na
huge_phage_4380_curated_final_249	145	0	0	0	0	0	0	0	0	0	0	0	1	1	1	0	0	1	1	0	0	1	0	1	1	0	1	1	1	1	0	0	1	0	0	1	0	1	1	16	na	na	na	na
ERR11029134_NODE_10_curated_complete_18	416	0	0	0	0	0	0	0	0	0	0	0	1	1	1	0	0	1	1	0	0	1	0	1	1	0	1	1	0	1	0	0	1	0	0	1	0	1	1	15	na	na	na	na
ERR11029134_NODE_10_curated_complete_241	105	0	0	0	0	0	0	0	0	0	0	0	1	1	1	0	0	1	1	0	0	1	0	1	1	0	0	1	1	1	0	0	1	0	0	1	0	1	1	15	na	na	na	na
ERR11029134_NODE_10_curated_complete_242	106	0	0	0	0	0	0	0	0	0	0	0	1	1	1	0	0	1	1	0	0	1	0	1	1	0	0	1	1	1	0	0	1	0	0	1	0	1	1	15	na	na	na	na
ERR11473358_NODE_44_curated_complete_96	85	0	0	0	0	0	0	0	0	0	0	0	0	1	0	1	1	0	0	1	1	0	1	1	0	1	0	0	1	1	1	1	0	1	1	0	1	0	0	15	Type II toxin-antitoxin system HicA family toxin	Toxin-Antitoxin complex from Streptococcus pneumoniae	na	na
ERR11473358_NODE_44_curated_complete_97	122	0	0	0	0	0	0	0	0	0	0	0	0	1	0	1	1	0	0	1	1	0	1	1	0	1	0	0	2	1	1	1	0	1	1	0	1	0	0	15	Putative nuclease of the RNAse H fold, HicB family	Crystal structure of the HicB antitoxin from E. coli	IncL/M type plasmid replication protein RepC	na
ERR3450778_NODE_10_curated_final_65	439	2	1	1	1	1	1	1	1	1	1	1	0	0	0	0	0	0	0	0	0	0	1	0	1	0	1	0	0	0	0	0	0	0	0	0	0	1	0	15	na	na	na	na
huge_phage_2979_curated_complete_148	340	1	1	1	1	1	1	1	1	1	1	1	0	0	0	0	0	0	0	1	0	0	1	0	0	0	0	1	0	0	0	0	1	0	0	0	0	0	0	15	Cytosine-specific methyltransferase (EC 2.1.1.37)	Crystal Structure of C71S Mutant of DNA Cytosine-5 Methyltransferase M.HaeIII Bound to DNA	DNA (cytosine-5-)-methyltransferase	na
huge_phage_3584_curated_final_316	1339	0	0	0	0	0	0	0	0	0	0	0	1	1	1	0	0	1	1	0	0	1	0	1	1	0	1	1	0	1	0	0	1	0	0	1	0	1	1	15	na	na	na	VirB6
huge_phage_3584_curated_final_317	607	0	0	0	0	0	0	0	0	0	0	0	1	1	1	0	0	1	1	0	0	1	0	1	1	0	1	1	0	1	0	0	1	0	0	1	0	1	1	15	na	na	na	na
ERR11029134_NODE_10_curated_complete_232	368	0	0	0	1	0	1	0	0	0	1	0	2	3	2	0	0	1	1	0	0	0	0	0	1	0	0	1	0	0	0	0	1	0	0	1	0	1	1	14	Transposase	Cryo-EM structure of the TnpB-omegaRNA-target DNA ternary complex	RNA-guided DNA endonuclease TnpB-like	na
ERR11029134_NODE_10_curated_complete_95	66	0	0	0	0	0	0	0	0	0	0	0	1	1	1	1	1	1	0	0	0	1	0	0	1	0	1	1	0	0	0	0	1	0	0	1	1	1	0	14	na	na	na	na
ERR11029134_NODE_10_curated_complete_96	305	0	0	0	0	0	0	0	0	0	0	0	1	1	1	1	1	1	0	0	0	1	0	0	1	0	1	1	0	0	0	0	1	0	0	1	1	1	0	14	Microbial-type PARG catalytic domain-containing protein	The X-ray crystal structure of poly(ADP-ribose) glycohydrolase bound to the inhibitor ADP-HPD from Thermomonospora curvata	TIGR02452 family protein	na
ERR11473358_NODE_44_curated_complete_329	215	0	0	0	0	0	0	0	0	0	0	0	0	1	1	0	0	1	0	1	0	0	1	0	1	0	0	0	1	1	1	1	0	1	0	1	1	1	0	14	Polynucleotide 5'-kinase and 3'-phosphatase	Crystal structure of a putative kinase (caur_3907) from chloroflexus aurantiacus j-10-fl at 1.70 A resolution	hypothetical protein	na
ERR11473975_NODE_51_curated_circular_252	66	0	0	0	0	0	0	0	0	0	0	0	0	0	0	0	1	1	0	1	1	0	1	1	0	0	1	1	1	0	1	0	0	1	1	1	0	0	1	14	na	na	na	na
ERR9250082_NODE_7_curated_complete_330	116	0	0	0	0	0	0	0	0	0	0	0	0	0	0	1	0	0	1	1	1	1	1	1	0	0	1	0	1	0	1	1	0	1	1	0	1	0	0	14	na	na	na	na
ERR11029134_NODE_10_curated_complete_108	453	0	0	0	0	0	0	0	0	0	0	0	1	1	0	0	0	1	1	0	0	1	0	1	1	0	0	1	1	0	1	0	1	0	0	0	1	1	0	13	Tail tube protein	na	na	na
ERR11029134_NODE_10_curated_complete_291	370	0	0	0	0	0	0	0	0	0	0	0	1	2	0	0	0	0	0	0	1	0	1	2	0	0	0	1	1	1	1	1	3	0	0	0	0	1	1	13	Endonuclease	Cryo-EM structure of the TnpB-omegaRNA-target DNA ternary complex	RNA-guided DNA endonuclease TnpB-like	na
ERR11029134_NODE_10_curated_complete_54	241	0	0	0	0	0	0	0	0	0	0	0	1	1	1	0	1	1	1	0	1	1	0	0	0	0	0	1	0	1	0	0	1	0	0	1	0	0	1	13	na	na	na	na
ERR11473358_NODE_44_curated_complete_358	466	2	0	0	1	1	1	2	1	1	1	1	0	1	0	0	0	0	0	0	0	0	0	0	0	0	0	0	1	0	1	0	0	0	0	0	0	1	0	13	na	IscB and wRNA bound to Target DNA	RNA-guided endonuclease IscB	na
ERR11475043_NODE_132_curated_complete_109	456	1	1	1	1	1	1	1	1	1	1	1	0	0	0	0	0	0	0	0	0	0	0	0	0	0	0	0	0	1	0	0	0	0	0	0	0	0	0	12	Tail tube protein	na	na	na
ERR11475043_NODE_132_curated_complete_146	67	1	1	1	1	1	1	1	1	1	1	1	0	0	1	0	0	0	0	0	0	0	0	0	0	0	0	0	0	0	0	0	0	0	0	0	0	0	0	12	na	Cryo-EM structure of the RNA Polymerase III-Maf1 complex	type I toxin-antitoxin system endodeoxyribonuclease toxin RalR	na
ERR11475043_NODE_132_curated_complete_386	287	1	1	1	1	1	1	1	1	1	1	1	0	0	0	0	0	0	0	0	0	0	0	0	0	0	0	0	0	0	0	0	1	0	0	0	0	0	0	12	ParA	Structure of Helicobacter pylori Soj-ADP complex bound to DNA	plasmid-partitioning protein RepA	ParA
ERR14838501_contig_2618_length_403255_complete_358	243	1	1	1	1	1	1	1	1	1	1	1	0	1	0	0	0	0	0	0	0	0	0	0	0	0	0	0	0	0	0	0	0	0	0	0	0	0	0	12	na	na	na	na
ERR14838502_contig_1965_length_377046_start_adj_complete_256	104	0	0	0	0	0	0	0	0	0	0	0	0	0	0	1	1	0	0	1	1	0	1	0	0	1	1	0	0	0	1	1	0	1	1	0	1	0	0	12	na	na	na	na
ERR14838502_contig_1965_length_377046_start_adj_complete_5	605	0	0	0	0	0	0	0	0	0	0	0	0	0	0	1	1	0	0	1	1	0	1	0	0	1	0	0	1	0	1	1	0	1	1	0	1	0	0	12	na	na	na	na
ERR14838502_contig_1965_length_377046_start_adj_complete_6	416	0	0	0	0	0	0	0	0	0	0	0	0	0	0	1	1	0	0	1	1	0	1	0	0	1	0	0	1	0	1	1	0	1	1	0	1	0	0	12	na	na	na	na
huge_phage_1554_curated_complete_315	1341	0	0	0	0	0	0	0	0	0	0	0	0	0	0	1	1	0	0	1	1	0	1	0	0	1	0	0	1	0	1	1	0	1	1	0	1	0	0	12	na	na	na	VirB6
huge_phage_3334_curated_complete_170	371	1	1	1	2	1	1	1	1	1	1	1	0	0	0	0	0	0	0	0	0	0	1	0	0	0	0	0	0	0	0	0	0	0	0	0	0	0	0	12	Cytosine-specific methyltransferase (EC 2.1.1.37)	crystal structure of Zea mays ZMET2 in complex H3(1-32)K9me2 peptide and SAH	DNA (cytosine-5-)-methyltransferase	na
ERR11473358_NODE_44_curated_complete_105	382	0	0	2	0	0	2	0	0	0	1	0	0	1	0	0	0	0	0	2	0	0	1	0	0	1	0	0	2	0	1	0	0	0	0	0	0	1	2	11	Endonuclease	Cryo-EM structure of the TnpB-omegaRNA-target DNA ternary complex	RNA-guided DNA endonuclease TnpB-like	na
ERR11475043_NODE_132_curated_complete_10	197	1	1	1	1	1	1	1	1	1	1	1	0	0	0	0	0	0	0	0	0	0	0	0	0	0	0	0	0	0	0	0	0	0	0	0	0	0	0	11	na	na	na	na
ERR11475043_NODE_132_curated_complete_101	107	1	1	1	1	1	1	1	1	1	1	1	0	0	0	0	0	0	0	0	0	0	0	0	0	0	0	0	0	0	0	0	0	0	0	0	0	0	0	11	Uncharacterized protein	na	na	na
ERR11475043_NODE_132_curated_complete_107	139	1	1	1	1	1	1	1	1	1	1	1	0	0	0	0	0	0	0	0	0	0	0	0	0	0	0	0	0	0	0	0	0	0	0	0	0	0	0	11	na	STRUCTURE DETERMINATION AND REFINEMENT OF RIBULOSE 1,5 BISPHOSPHATE CARBOXYLASE(SLASH)OXYGENASE FROM SYNECHOCOCCUS PCC6301	na	na
ERR11475043_NODE_132_curated_complete_108	81	1	1	1	1	1	1	1	1	1	1	1	0	0	0	0	0	0	0	0	0	0	0	0	0	0	0	0	0	0	0	0	0	0	0	0	0	0	0	11	Transmembrane protein	Crystal structure of a PE25-PPE41 heterodimer from a type VII secretion system of M. tuberculosis	transporter suffix domain	na
ERR11475043_NODE_132_curated_complete_119	633	1	1	1	1	1	1	1	1	1	1	1	0	0	0	0	0	0	0	0	0	0	0	0	0	0	0	0	0	0	0	0	0	0	0	0	0	0	0	11	na	type I-C Cascade bound to AcrIC4	na	Cas8c/Csd1
ERR11475043_NODE_132_curated_complete_120	330	1	1	1	1	1	1	1	1	1	1	1	0	0	0	0	0	0	0	0	0	0	0	0	0	0	0	0	0	0	0	0	0	0	0	0	0	0	0	11	na	type I-C Cascade	type I-C CRISPR-associated protein Cas7/Csd2	Cas7
ERR11475043_NODE_132_curated_complete_121	889	1	1	1	1	1	1	1	1	1	1	1	0	0	0	0	0	0	0	0	0	0	0	0	0	0	0	0	0	0	0	0	0	0	0	0	0	0	0	11	Putative helicase/exonuclease	na	na	na
ERR11475043_NODE_132_curated_complete_122	89	1	1	1	1	1	1	1	1	1	1	1	0	0	0	0	0	0	0	0	0	0	0	0	0	0	0	0	0	0	0	0	0	0	0	0	0	0	0	11	na	na	na	na
ERR11475043_NODE_132_curated_complete_123	91	1	1	1	1	1	1	1	1	1	1	1	0	0	0	0	0	0	0	0	0	0	0	0	0	0	0	0	0	0	0	0	0	0	0	0	0	0	0	11	na	na	na	na
ERR11475043_NODE_132_curated_complete_126	289	1	1	1	1	1	1	1	1	1	1	1	0	0	0	0	0	0	0	0	0	0	0	0	0	0	0	0	0	0	0	0	0	0	0	0	0	0	0	11	na	na	na	na
ERR11475043_NODE_132_curated_complete_127	214	1	1	1	1	1	1	1	1	1	1	1	0	0	0	0	0	0	0	0	0	0	0	0	0	0	0	0	0	0	0	0	0	0	0	0	0	0	0	11	DNA repair protein	na	na	na
ERR11475043_NODE_132_curated_complete_13	104	1	1	1	1	1	1	1	1	1	1	1	0	0	0	0	0	0	0	0	0	0	0	0	0	0	0	0	0	0	0	0	0	0	0	0	0	0	0	11	na	na	na	na
ERR11475043_NODE_132_curated_complete_130	386	1	1	1	1	1	1	1	1	1	1	1	0	0	0	0	0	0	0	0	0	0	0	0	0	0	0	0	0	0	0	0	0	0	0	0	0	0	0	11	Predicted hydrolase	Crystal structure of the complete modular teichioic acid phosphorylcholine esterase Pce (CbpE) from Streptococcus pneumoniae	AVAST type 1 anti-phage system MBL fold metallo-hydrolase Avs1a	na
ERR11475043_NODE_132_curated_complete_132	101	1	1	1	1	1	1	1	1	1	1	1	0	0	0	0	0	0	0	0	0	0	0	0	0	0	0	0	0	0	0	0	0	0	0	0	0	0	0	11	Uncharacterized protein	Solution NMR Structure of De novo designed protein LFR1 1 with ferredoxin fold, Northeast Structural Genomics Consortium (NESG) Target OR414	na	na
ERR11475043_NODE_132_curated_complete_133	185	1	1	1	1	1	1	1	1	1	1	1	0	0	0	0	0	0	0	0	0	0	0	0	0	0	0	0	0	0	0	0	0	0	0	0	0	0	0	11	na	na	na	na
ERR11475043_NODE_132_curated_complete_135	174	1	1	1	1	1	1	1	1	1	1	1	0	0	0	0	0	0	0	0	0	0	0	0	0	0	0	0	0	0	0	0	0	0	0	0	0	0	0	11	Uncharacterized protein	na	na	na
ERR11475043_NODE_132_curated_complete_136	155	1	1	1	1	1	1	1	1	1	1	1	0	0	0	0	0	0	0	0	0	0	0	0	0	0	0	0	0	0	0	0	0	0	0	0	0	0	0	11	Helix-turn-helix DNA binding domain protein	na	na	na
ERR11475043_NODE_132_curated_complete_138	303	1	1	1	1	1	1	1	1	1	1	1	0	0	0	0	0	0	0	0	0	0	0	0	0	0	0	0	0	0	0	0	0	0	0	0	0	0	0	11	ATPase family protein	26S proteasome, s1 state	proteasome-activating nucleotidase	na
ERR11475043_NODE_132_curated_complete_139	177	1	1	1	1	1	1	1	1	1	1	1	0	0	0	0	0	0	0	0	0	0	0	0	0	0	0	0	0	0	0	0	0	0	0	0	0	0	0	11	Putative endonuclease	Body domain of the mt-SSU assemblosome from Trypanosoma brucei	na	na
ERR11475043_NODE_132_curated_complete_14	222	1	1	1	1	1	1	1	1	1	1	1	0	0	0	0	0	0	0	0	0	0	0	0	0	0	0	0	0	0	0	0	0	0	0	0	0	0	0	11	Conserved thioredoxin	Crystal Structure of the Bacterocin Transport Accessory Protein from Streptococcus pneumoniae	PedC/BrcD family bacteriocin maturation disulfide isomerase	na
ERR11475043_NODE_132_curated_complete_149	309	1	1	1	1	1	1	1	1	1	1	1	0	0	0	0	0	0	0	0	0	0	0	0	0	0	0	0	0	0	0	0	0	0	0	0	0	0	0	11	AAA+ ATPase domain-containing protein	Crystal structure of AfCbbQ2, a MoxR AAA+-ATPase and CbbQO-type Rubisco activase from Acidithiobacillus ferrooxidans	cobaltochelatase subunit CobS	na
ERR11475043_NODE_132_curated_complete_15	66	1	1	1	1	1	1	1	1	1	1	1	0	0	0	0	0	0	0	0	0	0	0	0	0	0	0	0	0	0	0	0	0	0	0	0	0	0	0	11	Uncharacterized protein	na	p-hydroxybenzoic acid efflux pump operon protein AaeX	na
ERR11475043_NODE_132_curated_complete_152	128	1	1	1	1	1	1	1	1	1	1	1	0	0	0	0	0	0	0	0	0	0	0	0	0	0	0	0	0	0	0	0	0	0	0	0	0	0	0	11	Uncharacterized protein	na	na	na
ERR11475043_NODE_132_curated_complete_160	79	1	1	1	1	1	1	1	1	1	1	1	0	0	0	0	0	0	0	0	0	0	0	0	0	0	0	0	0	0	0	0	0	0	0	0	0	0	0	11	Soluble cytochrome b562 protein	Crystal structure of the FYVE domain of endofin (ZFYVE16) at 1.1A resolution	HVO_2753 family zinc finger protein	na
ERR11475043_NODE_132_curated_complete_162	223	1	1	1	1	1	1	1	1	1	1	1	0	0	0	0	0	0	0	0	0	0	0	0	0	0	0	0	0	0	0	0	0	0	0	0	0	0	0	11	na	na	na	na
ERR11475043_NODE_132_curated_complete_163	71	1	1	1	1	1	1	1	1	1	1	1	0	0	0	0	0	0	0	0	0	0	0	0	0	0	0	0	0	0	0	0	0	0	0	0	0	0	0	11	Uncharacterized protein	The crystal structure of lobe domain of E. coli RNA polymerase complexed with the C-terminal domain of UvrD	hypothetical protein	na
ERR11475043_NODE_132_curated_complete_164	147	1	1	1	1	1	1	1	1	1	1	1	0	0	0	0	0	0	0	0	0	0	0	0	0	0	0	0	0	0	0	0	0	0	0	0	0	0	0	11	na	na	na	na
ERR11475043_NODE_132_curated_complete_165	154	1	1	1	1	1	1	1	1	1	1	1	0	0	0	0	0	0	0	0	0	0	0	0	0	0	0	0	0	0	0	0	0	0	0	0	0	0	0	11	ASCH domain-containing protein	Crystal structure of ZmASCH S128A mutant protein from Zymomonas mobilis	N(4)-acetylcytidine aminohydrolase	na
ERR11475043_NODE_132_curated_complete_166	464	1	1	1	1	1	1	1	1	1	1	1	0	0	0	0	0	0	0	0	0	0	0	0	0	0	0	0	0	0	0	0	0	0	0	0	0	0	0	11	na	na	na	na
ERR11475043_NODE_132_curated_complete_168	77	1	1	1	1	1	1	1	1	1	1	1	0	0	0	0	0	0	0	0	0	0	0	0	0	0	0	0	0	0	0	0	0	0	0	0	0	0	0	11	Uncharacterized protein	na	na	na
ERR11475043_NODE_132_curated_complete_17	249	1	1	1	1	1	1	1	1	1	1	1	0	0	0	0	0	0	0	0	0	0	0	0	0	0	0	0	0	0	0	0	0	0	0	0	0	0	0	11	Uncharacterized protein	na	na	na
ERR11475043_NODE_132_curated_complete_171	141	1	1	1	1	1	1	1	1	1	1	1	0	0	0	0	0	0	0	0	0	0	0	0	0	0	0	0	0	0	0	0	0	0	0	0	0	0	0	11	na	na	na	na
ERR11475043_NODE_132_curated_complete_172	66	1	1	1	1	1	1	1	1	1	1	1	0	0	0	0	0	0	0	0	0	0	0	0	0	0	0	0	0	0	0	0	0	0	0	0	0	0	0	11	Uncharacterized protein	CRYSTAL STRUCTURE OF A PHENYLACETATE-COA OXYGENASE SUBUNIT PAAB (REUT_A2307) FROM RALSTONIA EUTROPHA JMP134 AT 2.65 A RESOLUTION	Htur_1727 family rSAM-partnered candidate RiPP	na
ERR11475043_NODE_132_curated_complete_173	262	1	1	1	1	1	1	1	1	1	1	1	0	0	0	0	0	0	0	0	0	0	0	0	0	0	0	0	0	0	0	0	0	0	0	0	0	0	0	11	PE-PGRS virulence associated protein	Crystal and cryoEM structural studies of a cell wall degrading enzyme in the bacteriophage phi29 tail	na	na
ERR11475043_NODE_132_curated_complete_174	112	1	1	1	1	1	1	1	1	1	1	1	0	0	0	0	0	0	0	0	0	0	0	0	0	0	0	0	0	0	0	0	0	0	0	0	0	0	0	11	Uncharacterized protein	na	na	na
ERR11475043_NODE_132_curated_complete_175	70	1	1	1	1	1	1	1	1	1	1	1	0	0	0	0	0	0	0	0	0	0	0	0	0	0	0	0	0	0	0	0	0	0	0	0	0	0	0	11	Transmembrane protein	na	Ced DNA import system-associated protein CedA2	na
ERR11475043_NODE_132_curated_complete_176	127	1	1	1	1	1	1	1	1	1	1	1	0	0	0	0	0	0	0	0	0	0	0	0	0	0	0	0	0	0	0	0	0	0	0	0	0	0	0	11	na	na	na	na
ERR11475043_NODE_132_curated_complete_177	176	1	1	1	1	1	1	1	1	1	1	1	0	0	0	0	0	0	0	0	0	0	0	0	0	0	0	0	0	0	0	0	0	0	0	0	0	0	0	11	Uncharacterized protein	na	na	na
ERR11475043_NODE_132_curated_complete_179	334	1	1	1	1	1	1	1	1	1	1	1	0	0	0	0	0	0	0	0	0	0	0	0	0	0	0	0	0	0	0	0	0	0	0	0	0	0	0	11	na	na	na	na
ERR11475043_NODE_132_curated_complete_180	193	1	1	1	1	1	1	1	1	1	1	1	0	0	0	0	0	0	0	0	0	0	0	0	0	0	0	0	0	0	0	0	0	0	0	0	0	0	0	11	Uncharacterized protein	na	na	na
ERR11475043_NODE_132_curated_complete_181	92	1	1	1	1	1	1	1	1	1	1	1	0	0	0	0	0	0	0	0	0	0	0	0	0	0	0	0	0	0	0	0	0	0	0	0	0	0	0	11	RNA pseudouridylate synthase	na	na	na
ERR11475043_NODE_132_curated_complete_182	86	1	1	1	1	1	1	1	1	1	1	1	0	0	0	0	0	0	0	0	0	0	0	0	0	0	0	0	0	0	0	0	0	0	0	0	0	0	0	11	na	na	na	na
ERR11475043_NODE_132_curated_complete_183	183	1	1	1	1	1	1	1	1	1	1	1	0	0	0	0	0	0	0	0	0	0	0	0	0	0	0	0	0	0	0	0	0	0	0	0	0	0	0	11	na	na	na	na
ERR11475043_NODE_132_curated_complete_185	112	1	1	1	1	1	1	1	1	1	1	1	0	0	0	0	0	0	0	0	0	0	0	0	0	0	0	0	0	0	0	0	0	0	0	0	0	0	0	11	Uncharacterized protein	Crystal structure of Bacillus halodurans OapB in complex with its OLE RNA target (crystal form II)	trimethoprim-resistant dihydrofolate reductase DfrB	na
ERR11475043_NODE_132_curated_complete_186	72	1	1	1	1	1	1	1	1	1	1	1	0	0	0	0	0	0	0	0	0	0	0	0	0	0	0	0	0	0	0	0	0	0	0	0	0	0	0	11	Uncharacterized protein	na	na	na
ERR11475043_NODE_132_curated_complete_187	116	1	1	1	1	1	1	1	1	1	1	1	0	0	0	0	0	0	0	0	0	0	0	0	0	0	0	0	0	0	0	0	0	0	0	0	0	0	0	11	Uncharacterized protein	na	na	na
ERR11475043_NODE_132_curated_complete_19	282	1	1	1	1	1	1	1	1	1	1	1	0	0	0	0	0	0	0	0	0	0	0	0	0	0	0	0	0	0	0	0	0	0	0	0	0	0	0	11	Gp123	BACTERIOPHAGE LAMBDA SER/THR PROTEIN PHOSPHATASE	protein-serine/threonine phosphatase	na
ERR11475043_NODE_132_curated_complete_190	316	1	1	1	1	1	1	1	1	1	1	1	0	0	0	0	0	0	0	0	0	0	0	0	0	0	0	0	0	0	0	0	0	0	0	0	0	0	0	11	na	na	na	na
ERR11475043_NODE_132_curated_complete_193	270	1	1	1	1	1	1	1	1	1	1	1	0	0	0	0	0	0	0	0	0	0	0	0	0	0	0	0	0	0	0	0	0	0	0	0	0	0	0	11	na	na	na	na
ERR11475043_NODE_132_curated_complete_202	528	1	1	1	1	1	1	1	1	1	1	1	0	0	0	0	0	0	0	0	0	0	0	0	0	0	0	0	0	0	0	0	0	0	0	0	0	0	0	11	Molecular chaperone, HSP90 family	Crystal structure of mouse Morc3 ATPase-CW cassette in complex with AMPPNP and unmodified H3 peptide	na	na
ERR11475043_NODE_132_curated_complete_203	80	1	1	1	1	1	1	1	1	1	1	1	0	0	0	0	0	0	0	0	0	0	0	0	0	0	0	0	0	0	0	0	0	0	0	0	0	0	0	11	Uncharacterized protein	na	na	na
ERR11475043_NODE_132_curated_complete_204	188	1	1	1	1	1	1	1	1	1	1	1	0	0	0	0	0	0	0	0	0	0	0	0	0	0	0	0	0	0	0	0	0	0	0	0	0	0	0	11	DUF3990 domain-containing protein	na	na	na
ERR11475043_NODE_132_curated_complete_205	83	1	1	1	1	1	1	1	1	1	1	1	0	0	0	0	0	0	0	0	0	0	0	0	0	0	0	0	0	0	0	0	0	0	0	0	0	0	0	11	Uncharacterized protein	na	na	na
ERR11475043_NODE_132_curated_complete_206	417	1	1	1	1	1	1	1	1	1	1	1	0	0	0	0	0	0	0	0	0	0	0	0	0	0	0	0	0	0	0	0	0	0	0	0	0	0	0	11	na	na	na	na
ERR11475043_NODE_132_curated_complete_207	102	1	1	1	1	1	1	1	1	1	1	1	0	0	0	0	0	0	0	0	0	0	0	0	0	0	0	0	0	0	0	0	0	0	0	0	0	0	0	11	Uncharacterized protein	The structure of the Tsi2 dimer with a disulfide bond	flagellar hook-basal body complex protein FliE	na
ERR11475043_NODE_132_curated_complete_209	297	1	1	2	1	1	1	1	1	1	1	1	0	0	0	0	0	0	0	0	0	0	0	0	0	0	0	0	0	0	0	0	0	0	0	0	0	0	0	11	Lipase/esterase	Crystal structure of ESTERASE B from Lactobacillus Rhamnosis (HN001)	acetyl esterase	na
ERR11475043_NODE_132_curated_complete_210	156	1	1	1	1	1	1	1	1	1	1	1	0	0	0	0	0	0	0	0	0	0	0	0	0	0	0	0	0	0	0	0	0	0	0	0	0	0	0	11	na	na	na	na
ERR11475043_NODE_132_curated_complete_211	301	1	1	1	1	1	1	1	1	1	1	1	0	0	0	0	0	0	0	0	0	0	0	0	0	0	0	0	0	0	0	0	0	0	0	0	0	0	0	11	Esterase	Crystal structure of a C6-C4 SN3 inhibited ESTERASE B from LACTOBACILLUS RHAMNOSIS	acetyl esterase	na
ERR11475043_NODE_132_curated_complete_213	129	1	1	1	1	1	1	1	1	1	1	1	0	0	0	0	0	0	0	0	0	0	0	0	0	0	0	0	0	0	0	0	0	0	0	0	0	0	0	11	na	na	na	na
ERR11475043_NODE_132_curated_complete_218	112	1	1	1	1	1	1	1	1	1	1	1	0	0	0	0	0	0	0	0	0	0	0	0	0	0	0	0	0	0	0	0	0	0	0	0	0	0	0	11	Uncharacterized protein	na	na	na
ERR11475043_NODE_132_curated_complete_219	148	1	1	1	1	1	1	1	1	1	1	1	0	0	0	0	0	0	0	0	0	0	0	0	0	0	0	0	0	0	0	0	0	0	0	0	0	0	0	11	Uncharacterized protein	na	na	na
ERR11475043_NODE_132_curated_complete_22	85	1	1	1	1	1	1	1	1	1	1	1	0	0	0	0	0	0	0	0	0	0	0	0	0	0	0	0	0	0	0	0	0	0	0	0	0	0	0	11	DUF551 domain-containing protein	Function And Structure Research of Salmonella typhimurium Unknown Functional Protein MicN	bacteriophage spanin2 family protein	na
ERR11475043_NODE_132_curated_complete_220	175	1	1	1	1	1	1	1	1	1	1	1	0	0	0	0	0	0	0	0	0	0	0	0	0	0	0	0	0	0	0	0	0	0	0	0	0	0	0	11	Uncharacterized protein	na	na	na
ERR11475043_NODE_132_curated_complete_221	210	1	1	1	1	1	1	1	1	1	1	1	0	0	0	0	0	0	0	0	0	0	0	0	0	0	0	0	0	0	0	0	0	0	0	0	0	0	0	11	DUF6273 domain-containing protein	na	na	na
ERR11475043_NODE_132_curated_complete_222	63	1	1	1	1	1	1	1	1	1	1	1	0	0	0	0	0	0	0	0	0	0	0	0	0	0	0	0	0	0	0	0	0	0	0	0	0	0	0	11	na	na	na	na
ERR11475043_NODE_132_curated_complete_223	229	1	1	1	1	1	1	1	1	1	1	1	0	0	0	0	0	0	0	0	0	0	0	0	0	0	0	0	0	0	0	0	0	0	0	0	0	0	0	11	na	na	na	na
ERR11475043_NODE_132_curated_complete_224	344	1	1	1	1	1	1	1	1	1	1	1	0	0	0	0	0	0	0	0	0	0	0	0	0	0	0	0	0	0	0	0	0	0	0	0	0	0	0	11	na	na	na	na
ERR11475043_NODE_132_curated_complete_226	98	1	1	1	1	1	1	1	1	1	1	1	0	0	0	0	0	0	0	0	0	0	0	0	0	0	0	0	0	0	0	0	0	0	0	0	0	0	0	11	Phage protein	na	na	na
ERR11475043_NODE_132_curated_complete_229	347	1	1	1	1	1	1	1	1	1	1	1	0	0	0	0	0	0	0	0	0	0	0	0	0	0	0	0	0	0	0	0	0	0	0	0	0	0	0	11	na	na	na	na
ERR11475043_NODE_132_curated_complete_23	265	1	1	1	1	1	1	1	1	1	1	1	0	0	0	0	0	0	0	0	0	0	0	0	0	0	0	0	0	0	0	0	0	0	0	0	0	0	0	11	na	na	na	na
ERR11475043_NODE_132_curated_complete_230	224	1	1	1	1	1	1	1	1	1	1	1	0	0	0	0	0	0	0	0	0	0	0	0	0	0	0	0	0	0	0	0	0	0	0	0	0	0	0	11	na	na	na	na
ERR11475043_NODE_132_curated_complete_233	343	1	1	1	1	1	1	1	1	1	1	1	0	0	0	0	0	0	0	0	0	0	0	0	0	0	0	0	0	0	0	0	0	0	0	0	0	0	0	11	na	na	na	na
ERR11475043_NODE_132_curated_complete_234	106	1	1	1	1	1	1	1	1	1	1	1	0	0	0	0	0	0	0	0	0	0	0	0	0	0	0	0	0	0	0	0	0	0	0	0	0	0	0	11	Uncharacterized protein	na	na	na
ERR11475043_NODE_132_curated_complete_238	185	1	1	1	1	1	1	1	1	1	1	2	0	0	0	0	0	0	0	0	0	0	0	0	0	0	0	0	0	0	0	0	0	0	0	0	0	0	0	11	Uncharacterized protein	Crystal structure of human cytosolic 5'(3')-deoxyribonucleotidase in complex with the inhibitor PB-PVU	HAD-IIIA family hydrolase	na
ERR11475043_NODE_132_curated_complete_247	242	1	1	1	1	1	1	1	1	1	1	1	0	0	0	0	0	0	0	0	0	0	0	0	0	0	0	0	0	0	0	0	0	0	0	0	0	0	0	11	YopX-like protein	Crystal structure of the uncharacterized protein CTC02137 from Clostridium tetani E88	phage conserved hypothetical protein TIGR01671	na
ERR11475043_NODE_132_curated_complete_248	92	1	1	1	1	1	1	1	1	1	1	1	0	0	0	0	0	0	0	0	0	0	0	0	0	0	0	0	0	0	0	0	0	0	0	0	0	0	0	11	Ribosome, girodazole, girolline, antibiotic complex, 50S	na	na	na
ERR11475043_NODE_132_curated_complete_249	198	1	1	1	1	1	1	1	1	1	1	1	0	0	0	0	0	0	0	0	0	0	0	0	0	0	0	0	0	0	0	0	0	0	0	0	0	0	0	11	Uncharacterized protein	na	na	na
ERR11475043_NODE_132_curated_complete_250	135	1	1	1	1	1	1	1	1	1	1	1	0	0	0	0	0	0	0	0	0	0	0	0	0	0	0	0	0	0	0	0	0	0	0	0	0	0	0	11	na	na	na	na
ERR11475043_NODE_132_curated_complete_251	137	1	1	1	1	1	1	1	1	1	1	1	0	0	0	0	0	0	0	0	0	0	0	0	0	0	0	0	0	0	0	0	0	0	0	0	0	0	0	11	na	na	na	na
ERR11475043_NODE_132_curated_complete_256	114	1	1	1	1	1	1	1	1	1	1	1	0	0	0	0	0	0	0	0	0	0	0	0	0	0	0	0	0	0	0	0	0	0	0	0	0	0	0	11	na	na	na	na
ERR11475043_NODE_132_curated_complete_257	90	1	1	1	1	1	1	1	1	1	1	1	0	0	0	0	0	0	0	0	0	0	0	0	0	0	0	0	0	0	0	0	0	0	0	0	0	0	0	11	Phage protein	CRYSTAL STRUCTURE OF A PHENYLACETATE-COA OXYGENASE SUBUNIT PAAB (REUT_A2307) FROM RALSTONIA EUTROPHA JMP134 AT 2.65 A RESOLUTION	na	na
ERR11475043_NODE_132_curated_complete_258	180	1	1	1	1	1	1	1	1	1	1	1	0	0	0	0	0	0	0	0	0	0	0	0	0	0	0	0	0	0	0	0	0	0	0	0	0	0	0	11	Uncharacterized protein	na	na	na
ERR11475043_NODE_132_curated_complete_259	239	1	1	1	1	1	1	1	1	1	1	1	0	0	0	0	0	0	0	0	0	0	0	0	0	0	0	0	0	0	0	0	0	0	0	0	0	0	0	11	na	na	na	na
ERR11475043_NODE_132_curated_complete_26	135	1	1	1	1	1	1	1	1	1	1	1	0	0	0	0	0	0	0	0	0	0	0	0	0	0	0	0	0	0	0	0	0	0	0	0	0	0	0	11	Gp660	Structure of a GNAT acetyltransferase SACOL1063 from Staphylococcus aureus in complex with CoA	aminoglycoside N-acetyltransferase AAC(3)-XI	na
ERR11475043_NODE_132_curated_complete_260	72	1	1	1	1	1	1	1	1	1	1	1	0	0	0	0	0	0	0	0	0	0	0	0	0	0	0	0	0	0	0	0	0	0	0	0	0	0	0	11	Uncharacterized protein ORF050	na	na	na
ERR11475043_NODE_132_curated_complete_261	255	1	1	1	1	1	1	1	1	1	1	1	0	0	0	0	0	0	0	0	0	0	0	0	0	0	0	0	0	0	0	0	0	0	0	0	0	0	0	11	Repressor domain protein	na	na	na
ERR11475043_NODE_132_curated_complete_264	154	1	1	1	1	1	1	1	1	1	1	1	0	0	0	0	0	0	0	0	0	0	0	0	0	0	0	0	0	0	0	0	0	0	0	0	0	0	0	11	Uncharacterized protein	na	na	na
ERR11475043_NODE_132_curated_complete_265	108	1	1	1	1	1	1	1	1	1	1	1	0	0	0	0	0	0	0	0	0	0	0	0	0	0	0	0	0	0	0	0	0	0	0	0	0	0	0	11	Uncharacterized protein	Crystal structure of Staphylococcus aureus PstA in complex with c-di-AMP	na	na
ERR11475043_NODE_132_curated_complete_266	206	1	1	1	1	1	1	1	1	1	1	1	0	0	0	0	0	0	0	0	0	0	0	0	0	0	0	0	0	0	0	0	0	0	0	0	0	0	0	11	na	na	na	na
ERR11475043_NODE_132_curated_complete_267	175	1	1	1	1	1	1	1	1	1	1	1	0	0	0	0	0	0	0	0	0	0	0	0	0	0	0	0	0	0	0	0	0	0	0	0	0	0	0	11	na	na	na	na
ERR11475043_NODE_132_curated_complete_269	156	1	1	1	1	1	1	1	1	1	1	1	0	0	0	0	0	0	0	0	0	0	0	0	0	0	0	0	0	0	0	0	0	0	0	0	0	0	0	11	Virion structural protein	Crystal structure of JNK in complex with a regulator protein	na	na
ERR11475043_NODE_132_curated_complete_271	500	1	1	1	1	1	1	1	1	1	1	1	0	0	0	0	0	0	0	0	0	0	0	0	0	0	0	0	0	0	0	0	0	0	0	0	0	0	0	11	Glycosyltransferase RgtA/B/C/D-like domain-containing protein	Cryo-EM structure of yeast Ost6p containing oligosaccharyltransferase complex	oligosaccharyl transferase, archaeosortase A system-associated	na
ERR11475043_NODE_132_curated_complete_272	663	1	1	1	1	1	1	1	1	1	1	1	0	0	0	0	0	0	0	0	0	0	0	0	0	0	0	0	0	0	0	0	0	0	0	0	0	0	0	11	na	na	na	na
ERR11475043_NODE_132_curated_complete_274	246	1	1	1	1	1	1	1	1	1	1	1	0	0	0	0	0	0	0	0	0	0	0	0	0	0	0	0	0	0	0	0	0	0	0	0	0	0	0	11	na	na	na	na
ERR11475043_NODE_132_curated_complete_276	156	1	1	1	1	1	1	1	1	1	1	1	0	0	0	0	0	0	0	0	0	0	0	0	0	0	0	0	0	0	0	0	0	0	0	0	0	0	0	11	na	na	na	na
ERR11475043_NODE_132_curated_complete_277	184	1	1	1	1	1	1	1	1	1	1	1	0	0	0	0	0	0	0	0	0	0	0	0	0	0	0	0	0	0	0	0	0	0	0	0	0	0	0	11	DNA packaging protein OPG160	Crystal Structure of sso2452 from Sulfolobus solfataricus P2	SOS-induced cell division inhibitor SulA, Pseudomonas type	na
ERR11475043_NODE_132_curated_complete_278	484	1	1	1	1	1	1	1	1	1	1	1	0	0	0	0	0	0	0	0	0	0	0	0	0	0	0	0	0	0	0	0	0	0	0	0	0	0	0	11	na	na	na	na
ERR11475043_NODE_132_curated_complete_279	327	1	1	1	1	1	1	1	1	1	1	1	0	0	0	0	0	0	0	0	0	0	0	0	0	0	0	0	0	0	0	0	0	0	0	0	0	0	0	11	ADP-ribosylglycohydrolase	Crystal Structure of the dinitrogenase reductase-activating glycohydrolase (DRAG) from Rhodospirillum rubrum in complex with ADP- ribsoyllysine	ADP-ribosylarginine hydrolase Tri1	na
ERR11475043_NODE_132_curated_complete_29	421	1	2	0	1	0	1	0	0	0	1	1	0	0	1	0	2	0	0	0	1	0	1	0	0	0	0	0	0	1	0	0	0	0	0	0	0	0	0	11	na	IscB and wRNA bound to Target DNA	RNA-guided endonuclease IscB	na
ERR11475043_NODE_132_curated_complete_30	116	1	1	1	1	1	1	1	1	1	1	1	0	0	0	0	0	0	0	0	0	0	0	0	0	0	0	0	0	0	0	0	0	0	0	0	0	0	0	11	ArnR1-like winged helix-turn-helix domain-containing protein	Solution structure of the WH domain of MORF	na	na
ERR11475043_NODE_132_curated_complete_352	301	1	1	1	1	1	1	1	1	1	1	1	0	0	0	0	0	0	0	0	0	0	0	0	0	0	0	0	0	0	0	0	0	0	0	0	0	0	0	11	na	na	na	na
ERR11475043_NODE_132_curated_complete_353	85	1	1	1	1	1	1	1	1	1	1	1	0	0	0	0	0	0	0	0	0	0	0	0	0	0	0	0	0	0	0	0	0	0	0	0	0	0	0	11	Uncharacterized protein	Structure of the membrane-bound sulfane sulfur reductase (MBS), an archaeal respiratory membrane complex	na	na
ERR11475043_NODE_132_curated_complete_354	268	1	1	1	1	1	1	1	1	1	1	1	0	0	0	0	0	0	0	0	0	0	0	0	0	0	0	0	0	0	0	0	0	0	0	0	0	0	0	11	na	na	na	na
ERR11475043_NODE_132_curated_complete_358	195	1	1	1	1	1	1	1	1	1	1	1	0	0	0	0	0	0	0	0	0	0	0	0	0	0	0	0	0	0	0	0	0	0	0	0	0	0	0	11	na	na	na	na
ERR11475043_NODE_132_curated_complete_359	324	1	1	1	1	1	1	1	1	1	1	1	0	0	0	0	0	0	0	0	0	0	0	0	0	0	0	0	0	0	0	0	0	0	0	0	0	0	0	11	na	na	na	na
ERR11475043_NODE_132_curated_complete_360	197	1	1	1	1	1	1	1	1	1	1	1	0	0	0	0	0	0	0	0	0	0	0	0	0	0	0	0	0	0	0	0	0	0	0	0	0	0	0	11	Uncharacterized protein	Structure of a Protein of Unknown Function from Bacteroides thetaiotaomicron.	ADP-ribose-binding protein	na
ERR11475043_NODE_132_curated_complete_361	734	1	1	1	1	1	1	1	1	1	1	1	0	0	0	0	0	0	0	0	0	0	0	0	0	0	0	0	0	0	0	0	0	0	0	0	0	0	0	11	Uncharacterized protein	na	na	na
ERR11475043_NODE_132_curated_complete_362	111	1	1	1	1	1	1	1	1	1	1	1	0	0	0	0	0	0	0	0	0	0	0	0	0	0	0	0	0	0	0	0	0	0	0	0	0	0	0	11	Coil containing protein	Crystal structure of the Zn-directed tetramer of the engineered cyt cb562 variant, A104/57G AB3	na	na
ERR11475043_NODE_132_curated_complete_364	175	1	1	1	1	1	1	1	1	1	1	1	0	0	0	0	0	0	0	0	0	0	0	0	0	0	0	0	0	0	0	0	0	0	0	0	0	0	0	11	Putative adenine-specific methylase	na	phage N-6-adenine-methyltransferase	na
ERR11475043_NODE_132_curated_complete_365	203	1	1	1	1	1	1	1	1	1	1	1	0	0	0	0	0	0	0	0	0	0	0	0	0	0	0	0	0	0	0	0	0	0	0	0	0	0	0	11	N-acetyltransferase domain-containing protein	Crystal structure of Ard1 N-terminal acetyltransferase E88H/H127E mutant from Sulfolobus solfataricus	aminoglycoside N-acetyltransferase AAC(3)-XI	na
ERR11475043_NODE_132_curated_complete_366	143	1	1	1	1	1	1	1	1	1	1	1	0	0	0	0	0	0	0	0	0	0	0	0	0	0	0	0	0	0	0	0	0	0	0	0	0	0	0	11	na	na	na	na
ERR11475043_NODE_132_curated_complete_367	513	1	1	1	1	1	1	1	1	1	1	1	0	0	0	0	0	0	0	0	0	0	0	0	0	0	0	0	0	0	0	0	0	0	0	0	0	0	0	11	na	na	na	na
ERR11475043_NODE_132_curated_complete_368	320	1	1	1	1	1	1	1	1	1	1	1	0	0	0	0	0	0	0	0	0	0	0	0	0	0	0	0	0	0	0	0	0	0	0	0	0	0	0	11	Gp506	A CBg-ParM filament with GTP and a short incubation time	plasmid segregation protein ParM	ParM/StbA
ERR11475043_NODE_132_curated_complete_370	208	1	1	1	1	1	1	1	1	1	1	1	0	0	0	0	0	0	0	0	0	0	0	0	0	0	0	0	0	0	0	0	0	0	0	0	0	0	0	11	na	na	na	na
ERR11475043_NODE_132_curated_complete_371	165	1	1	1	1	1	1	1	1	1	1	1	0	0	0	0	0	0	0	0	0	0	0	0	0	0	0	0	0	0	0	0	0	0	0	0	0	0	0	11	ribonuclease H (EC 3.1.26.4)	Crystal structure of the Ribonuclease H1 from Chlorobium tepidum	ribonuclease H	na
ERR11475043_NODE_132_curated_complete_372	355	1	1	1	1	1	1	1	1	1	1	1	0	0	0	0	0	0	0	0	0	0	0	0	0	0	0	0	0	0	0	0	0	0	0	0	0	0	0	11	na	na	na	na
ERR11475043_NODE_132_curated_complete_373	155	1	1	1	1	1	1	1	1	1	1	1	0	0	0	0	0	0	0	0	0	0	0	0	0	0	0	0	0	0	0	0	0	0	0	0	0	0	0	11	DNA polymerase II large subunit	na	na	na
ERR11475043_NODE_132_curated_complete_374	158	1	1	1	1	1	1	1	1	1	1	1	0	0	0	0	0	0	0	0	0	0	0	0	0	0	0	0	0	0	0	0	0	0	0	0	0	0	0	11	HNHc domain containing protein	na	na	na
ERR11475043_NODE_132_curated_complete_376	195	1	1	1	1	1	1	1	1	1	1	1	0	0	0	0	0	0	0	0	0	0	0	0	0	0	0	0	0	0	0	0	0	0	0	0	0	0	0	11	na	na	na	na
ERR11475043_NODE_132_curated_complete_377	579	1	1	1	1	1	1	1	1	1	1	1	0	0	0	0	0	0	0	0	0	0	0	0	0	0	0	0	0	0	0	0	0	0	0	0	0	0	0	11	na	na	na	na
ERR11475043_NODE_132_curated_complete_378	223	1	1	1	1	1	1	1	1	1	1	1	0	0	0	0	0	0	0	0	0	0	0	0	0	0	0	0	0	0	0	0	0	0	0	0	0	0	0	11	na	na	na	na
ERR11475043_NODE_132_curated_complete_379	385	1	1	1	1	1	1	1	1	1	1	1	0	0	0	0	0	0	0	0	0	0	0	0	0	0	0	0	0	0	0	0	0	0	0	0	0	0	0	11	na	na	na	na
ERR11475043_NODE_132_curated_complete_382	260	1	1	1	1	1	1	1	1	1	1	1	0	0	0	0	0	0	0	0	0	0	0	0	0	0	0	0	0	0	0	0	0	0	0	0	0	0	0	11	Single strand binding protein	Structure of single-stranded DNA-binding protein (SSB) from D. radiodurans	single-stranded DNA-binding protein	na
ERR11475043_NODE_132_curated_complete_383	608	1	1	1	1	1	1	1	1	1	1	1	0	0	0	0	0	0	0	0	0	0	0	0	0	0	0	0	0	0	0	0	0	0	0	0	0	0	0	11	Porphyrin biosynthetic protein	na	cobaltochelatase subunit CobS	na
ERR11475043_NODE_132_curated_complete_384	160	1	1	1	1	1	1	1	1	1	1	1	0	0	0	0	0	0	0	0	0	0	0	0	0	0	0	0	0	0	0	0	0	0	0	0	0	0	0	11	Ribbon-helix-helix protein CopG domain-containing protein	na	na	na
ERR11475043_NODE_132_curated_complete_385	421	1	1	1	1	1	1	1	1	1	1	1	0	0	0	0	0	0	0	0	0	0	0	0	0	0	0	0	0	0	0	0	0	0	0	0	0	0	0	11	Chromosome partitioning protein	na	nucleoid occlusion protein	ParB
ERR11475043_NODE_132_curated_complete_387	524	1	1	1	1	1	1	1	1	1	1	1	0	0	0	0	0	0	0	0	0	0	0	0	0	0	0	0	0	0	0	0	0	0	0	0	0	0	0	11	COG5527 Protein involved in initiation of plasmid replication	na	replication initiation protein RepE	Replication initial protein
ERR11475043_NODE_132_curated_complete_389	821	1	1	1	1	1	1	1	1	2	1	1	0	0	0	0	0	0	0	0	0	0	0	0	0	0	0	0	0	0	0	0	0	0	0	0	0	0	0	11	RecD helicase /ATP-dependent exoDNAse	Crystal structure of the binary complex of RecD2 with DNA	ATP-dependent RecD-like DNA helicase	helicase
ERR11475043_NODE_132_curated_complete_390	659	1	1	1	1	1	1	1	1	1	1	1	0	0	0	0	0	0	0	0	0	0	0	0	0	0	0	0	0	0	0	0	0	0	0	0	0	0	0	11	AAA domain protein	Structure of RecG bound to three-way DNA junction	ATP-dependent DNA helicase RecG	na
ERR11475043_NODE_132_curated_complete_391	233	1	1	1	1	1	1	1	1	1	1	1	0	0	0	0	0	0	0	0	0	0	0	0	0	0	0	0	0	0	0	0	0	0	0	0	0	0	0	11	Viral protein TPX-VT3 exhibiting genomic variation	na	na	na
ERR11475043_NODE_132_curated_complete_392	397	1	1	1	1	1	1	1	1	1	1	1	0	0	0	0	0	0	0	0	0	0	0	0	0	0	0	0	0	0	0	0	0	0	0	0	0	0	0	11	na	na	na	na
ERR11475043_NODE_132_curated_complete_393	152	1	1	1	1	1	1	1	1	1	1	1	0	0	0	0	0	0	0	0	0	0	0	0	0	0	0	0	0	0	0	0	0	0	0	0	0	0	0	11	na	na	na	na
ERR11475043_NODE_132_curated_complete_395	190	1	1	1	1	1	1	1	1	1	1	1	0	0	0	0	0	0	0	0	0	0	0	0	0	0	0	0	0	0	0	0	0	0	0	0	0	0	0	11	HDc domain containing protein	na	integrating conjugative element relaxase, PFGI-1 class	HD nuclease/MOBH relaxase
ERR11475043_NODE_132_curated_complete_396	243	1	1	1	1	1	1	1	1	1	1	1	0	0	0	0	0	0	0	0	0	0	0	0	0	0	0	0	0	0	0	0	0	0	0	0	0	0	0	11	Phage related protein	na	na	na
ERR11475043_NODE_132_curated_complete_397	50	1	1	1	1	1	1	1	1	1	1	1	0	0	0	0	0	0	0	0	0	0	0	0	0	0	0	0	0	0	0	0	0	0	0	0	0	0	0	11	na	na	na	na
ERR11475043_NODE_132_curated_complete_399	226	1	1	1	1	1	1	1	1	1	1	1	0	0	0	0	0	0	0	0	0	0	0	0	0	0	0	0	0	0	0	0	0	0	0	0	0	0	0	11	na	na	na	na
ERR11475043_NODE_132_curated_complete_4	464	1	1	1	1	1	1	1	1	1	1	1	0	0	0	0	0	0	0	0	0	0	0	0	0	0	0	0	0	0	0	0	0	0	0	0	0	0	0	11	na	na	na	na
ERR11475043_NODE_132_curated_complete_40	300	1	1	1	1	1	1	1	1	1	1	1	0	0	0	0	0	0	0	0	0	0	0	0	0	0	0	0	0	0	0	0	0	0	0	0	0	0	0	11	na	na	na	na
ERR11475043_NODE_132_curated_complete_400	319	1	1	1	1	1	1	1	1	1	1	1	0	0	0	0	0	0	0	0	0	0	0	0	0	0	0	0	0	0	0	0	0	0	0	0	0	0	0	11	na	na	na	na
ERR11475043_NODE_132_curated_complete_401	400	1	1	1	1	1	1	1	1	1	1	1	0	0	0	0	0	0	0	0	0	0	0	0	0	0	0	0	0	0	0	0	0	0	0	0	0	0	0	11	Bacterial DnaG primase, TOPRIM domain	Crystal Structure of the Aquifex aeolicus primase (Zinc Binding and RNA Polymerase Domains)	DNA primase	na
ERR11475043_NODE_132_curated_complete_402	331	1	1	1	1	1	1	1	1	1	1	1	0	0	0	0	0	0	0	0	0	0	0	0	0	0	0	0	0	0	0	0	0	0	0	0	0	0	0	11	Uncharacterized protein	na	na	na
ERR11475043_NODE_132_curated_complete_403	95	1	1	1	1	1	1	1	1	1	1	1	0	0	0	0	0	0	0	0	0	0	0	0	0	0	0	0	0	0	0	0	0	0	0	0	0	0	0	11	na	na	na	na
ERR11475043_NODE_132_curated_complete_404	180	1	1	1	1	1	1	1	1	1	1	1	0	0	0	0	0	0	0	0	0	0	0	0	0	0	0	0	0	0	0	0	0	0	0	0	0	0	0	11	Peptidase S26 domain-containing protein	Structure and activity of Streptococcus pyogenes SipA: a signal peptidase homologue essential for pilus polymerisation	signal peptidase I	na
ERR11475043_NODE_132_curated_complete_405	402	1	1	1	1	1	1	1	1	1	1	1	0	0	0	0	0	0	0	0	0	0	0	0	0	0	0	0	0	0	0	0	0	0	0	0	0	0	0	11	DUF932 domain-containing protein	na	na	na
ERR11475043_NODE_132_curated_complete_406	394	1	1	1	1	1	1	1	1	1	1	1	0	0	0	0	0	0	0	0	0	0	0	0	0	0	0	0	0	0	0	0	0	0	0	0	0	0	0	11	YqaJ-domain containing exonuclease	Crystal Structure of the K131A Mutant of Lambda Exonuclease in Complex with a 5'-Phosphorylated 14-mer/12-mer Duplex and Magnesium	na	na
ERR11475043_NODE_132_curated_complete_407	148	1	1	1	1	1	1	1	1	1	1	1	0	0	0	0	0	0	0	0	0	0	0	0	0	0	0	0	0	0	0	0	0	0	0	0	0	0	0	11	na	na	na	na
ERR11475043_NODE_132_curated_complete_409	560	1	1	1	1	1	1	1	1	1	1	1	0	0	0	0	0	0	0	0	0	0	0	0	0	0	0	0	0	0	0	0	0	0	0	0	0	0	0	11	na	na	na	na
ERR11475043_NODE_132_curated_complete_41	321	1	1	1	1	1	1	1	1	1	1	1	0	0	0	0	0	0	0	0	0	0	0	0	0	0	0	0	0	0	0	0	0	0	0	0	0	0	0	11	Competence protein CoiA-like family protein	na	na	na
ERR11475043_NODE_132_curated_complete_410	153	1	1	1	1	1	1	1	1	1	1	1	0	0	0	0	0	0	0	0	0	0	0	0	0	0	0	0	0	0	0	0	0	0	0	0	0	0	0	11	Uncharacterized protein	na	na	na
ERR11475043_NODE_132_curated_complete_411	760	1	1	1	1	2	2	1	1	1	1	1	0	0	0	0	0	0	0	0	0	0	0	0	0	0	0	0	0	0	0	0	0	0	0	0	0	0	0	11	RecD helicase /ATP-dependent exoDNAse	Crystal structure of the ternary complex of RecD2 with DNA and ADPNP	ATP-dependent RecD-like DNA helicase	na
ERR11475043_NODE_132_curated_complete_44	195	1	1	1	1	1	1	1	1	1	1	1	0	0	0	0	0	0	0	0	0	0	0	0	0	0	0	0	0	0	0	0	0	0	0	0	0	0	0	11	na	AbiEi antitoxin from Streptococcus agalactiae	na	na
ERR11475043_NODE_132_curated_complete_45	287	1	1	1	1	1	1	1	1	1	1	1	0	0	0	0	0	0	0	0	0	0	0	0	0	0	0	0	0	0	0	0	0	0	0	0	0	0	0	11	Nucleotidyl transferase AbiEii/AbiGii toxin family protein	Crystal structure of putative nucleotidyltransferase from H. pylori	na	na
ERR11475043_NODE_132_curated_complete_46	493	1	1	1	1	1	1	1	1	1	1	1	0	0	0	0	0	0	0	0	0	0	0	0	0	0	0	0	0	0	0	0	0	0	0	0	0	0	0	11	na	na	na	na
ERR11475043_NODE_132_curated_complete_5	727	1	1	1	1	2	1	1	1	1	1	1	0	0	0	0	0	0	0	0	0	0	0	0	0	0	0	0	0	0	0	0	0	0	0	0	0	0	0	11	na	Mechanism of regulation of the Helicobacter pylori Cagbeta ATPase by CagZ	conjugal transfer coupling protein TraG	VirD4
ERR11475043_NODE_132_curated_complete_57	71	1	1	1	1	1	1	1	1	1	1	1	0	0	0	0	0	0	0	0	0	0	0	0	0	0	0	0	0	0	0	0	0	0	0	0	0	0	0	11	Uncharacterized protein	na	na	na
ERR11475043_NODE_132_curated_complete_67	212	1	1	1	1	1	1	1	1	1	1	1	0	0	0	0	0	0	0	0	0	0	0	0	0	0	0	0	0	0	0	0	0	0	0	0	0	0	0	11	Sigma-70 family RNA polymerase sigma factor	na	RNA polymerase factor sigma-70	na
ERR11475043_NODE_132_curated_complete_68	216	1	1	1	1	1	1	1	1	1	1	1	0	0	0	0	0	0	0	0	0	0	0	0	0	0	0	0	0	0	0	0	0	0	0	0	0	0	0	11	na	na	na	na
ERR11475043_NODE_132_curated_complete_69	151	1	1	1	1	1	1	1	1	1	1	1	0	0	0	0	0	0	0	0	0	0	0	0	0	0	0	0	0	0	0	0	0	0	0	0	0	0	0	11	RnhA Ribonuclease HI	CO-CRYSTAL OF E. COLI RNASE HI WITH TWO MN2+ IONS BOUND IN THE THE ACTIVE SITE	ribonuclease HI	na
ERR11475043_NODE_132_curated_complete_70	208	1	1	1	1	1	1	1	1	1	1	1	0	0	0	0	0	0	0	0	0	0	0	0	0	0	0	0	0	0	0	0	0	0	0	0	0	0	0	11	na	na	na	na
ERR11475043_NODE_132_curated_complete_71	247	1	1	1	1	1	1	1	1	1	1	1	0	0	0	0	0	0	0	0	0	0	0	0	0	0	0	0	0	0	0	0	0	0	0	0	0	0	0	11	na	na	na	the protein upstream of SecY - should be related as the best structure hit is 6WA9 - https://search.foldseek.com/result/-E0AF6TabKWsLOuM5eXiysedehZQqb2jkPt-aQ/0 and https://www.rcsb.org/structure/6WA9
ERR11475043_NODE_132_curated_complete_77	214	1	1	1	1	1	1	1	1	1	1	1	0	0	0	0	0	0	0	0	0	0	0	0	0	0	0	0	0	0	0	0	0	0	0	0	0	0	0	11	na	na	na	na
ERR11475043_NODE_132_curated_complete_78	67	1	1	1	1	1	1	1	1	1	1	1	0	0	0	0	0	0	0	0	0	0	0	0	0	0	0	0	0	0	0	0	0	0	0	0	0	0	0	11	Uncharacterized protein	na	na	na
ERR11475043_NODE_132_curated_complete_79	266	1	1	1	1	1	1	1	1	1	1	1	0	0	0	0	0	0	0	0	0	0	0	0	0	0	0	0	0	0	0	0	0	0	0	0	0	0	0	11	na	na	na	na
ERR11475043_NODE_132_curated_complete_8	408	1	1	1	1	1	1	1	1	1	1	1	0	0	0	0	0	0	0	0	0	0	0	0	0	0	0	0	0	0	0	0	0	0	0	0	0	0	0	11	na	na	na	na
ERR11475043_NODE_132_curated_complete_83	169	1	1	1	1	1	1	1	1	1	1	1	0	0	0	0	0	0	0	0	0	0	0	0	0	0	0	0	0	0	0	0	0	0	0	0	0	0	0	11	na	na	na	na
ERR11475043_NODE_132_curated_complete_84	627	1	1	1	1	1	1	1	1	1	2	1	0	0	0	0	0	0	0	0	0	0	0	0	0	0	0	0	0	0	0	0	0	0	0	0	0	0	0	11	na	na	na	na
ERR11475043_NODE_132_curated_complete_86	271	1	1	2	1	1	1	1	1	1	1	1	0	0	0	0	0	0	0	0	0	0	0	0	0	0	0	0	0	0	0	0	0	0	0	0	0	0	0	11	COG1512 Beta-propeller domains of methanol dehydrogenase type	CRYSTAL STRUCTURE OF THE BA41 PROTEIN FROM BIZIONIA ARGENTINENSIS	na	na
ERR11475043_NODE_132_curated_complete_87	198	1	1	1	1	1	1	1	1	1	1	1	0	0	0	0	0	0	0	0	0	0	0	0	0	0	0	0	0	0	0	0	0	0	0	0	0	0	0	11	Uncharacterized protein	Crystal structure of a lema protein (tm0961) from thermotoga maritima msb8 at 2.28 A resolution	magnetosome protein MamQ	na
ERR11475043_NODE_132_curated_complete_9	897	1	1	1	1	1	1	1	1	1	1	1	0	0	0	0	0	0	0	0	0	0	0	0	0	0	0	0	0	0	0	0	0	0	0	0	0	0	0	11	Gp155	TrwK/VirB4unbound dimer complex from R388 type IV secretion system determined by cryo-EM.	type IV secretion system protein TraC	VirB4
ERR14838501_contig_2618_length_403255_complete_115	145	1	1	1	1	1	1	1	1	1	1	1	0	0	0	0	0	0	0	0	0	0	0	0	0	0	0	0	0	0	0	0	0	0	0	0	0	0	0	11	na	na	na	na
ERR14838501_contig_2618_length_403255_complete_120	393	1	1	1	1	1	1	1	1	1	1	1	0	0	0	0	0	0	0	0	0	0	0	0	0	0	0	0	0	0	0	0	0	0	0	0	0	0	0	11	na	na	na	na
ERR14838501_contig_2618_length_403255_complete_125	495	1	1	1	1	1	1	1	1	1	1	1	0	0	0	0	0	0	0	0	0	0	0	0	0	0	0	0	0	0	0	0	0	0	0	0	0	0	0	11	na	na	na	na
ERR14838501_contig_2618_length_403255_complete_250	264	1	1	1	1	1	1	1	1	1	1	1	0	0	0	0	0	0	0	0	0	0	0	0	0	0	0	0	0	0	0	0	0	0	0	0	0	0	0	11	na	na	na	na
ERR14838501_contig_2618_length_403255_complete_313	236	1	1	1	1	1	1	1	1	1	1	1	0	0	0	0	0	0	0	0	0	0	0	0	0	0	0	0	0	0	0	0	0	0	0	0	0	0	0	11	na	na	na	na
ERR14838501_contig_2618_length_403255_complete_339	183	1	1	1	1	1	1	1	1	1	1	1	0	0	0	0	0	0	0	0	0	0	0	0	0	0	0	0	0	0	0	0	0	0	0	0	0	0	0	11	Uncharacterized protein	na	na	na
ERR14838501_contig_2618_length_403255_complete_354	165	1	1	1	1	1	1	1	1	1	1	1	0	0	0	0	0	0	0	0	0	0	0	0	0	0	0	0	0	0	0	0	0	0	0	0	0	0	0	11	na	na	na	na
ERR14838501_contig_2618_length_403255_complete_384	100	1	1	1	1	1	1	1	1	1	1	1	0	0	0	0	0	0	0	0	0	0	0	0	0	0	0	0	0	0	0	0	0	0	0	0	0	0	0	11	Uncharacterized protein	na	na	na
ERR14838501_contig_2618_length_403255_complete_73	168	1	1	1	1	1	1	1	1	1	1	1	0	0	0	0	0	0	0	0	0	0	0	0	0	0	0	0	0	0	0	0	0	0	0	0	0	0	0	11	na	na	na	na
ERR14838501_contig_2618_length_403255_complete_91	174	1	1	1	1	1	1	1	1	1	1	1	0	0	0	0	0	0	0	0	0	0	0	0	0	0	0	0	0	0	0	0	0	0	0	0	0	0	0	11	Endonuclease	VRR_NUC domain	na	na
ERR14838502_contig_1965_length_377046_start_adj_complete_327	109	0	0	0	0	0	0	0	0	0	0	0	0	0	0	1	1	0	0	1	1	0	1	0	0	1	0	0	0	0	1	1	0	1	1	0	1	0	0	11	na	na	na	na
ERR4334199_NODE_10_curated_complete_291	141	0	0	0	0	0	0	0	0	0	0	0	1	0	0	0	1	0	0	1	0	0	0	1	0	0	0	0	1	0	1	1	1	1	0	0	1	0	1	11	Uncharacterized protein	Crystal structure of the cyanobacterial metallothionein repressor SmtB (C14S/C61S/C121S mutant) in the Zn2alpha5-form	na	na
huge_phage_2159_curated_complete_107	78	1	1	1	1	1	1	1	1	1	1	1	0	0	0	0	0	0	0	0	0	0	0	0	0	0	0	0	0	0	0	0	0	0	0	0	0	0	0	11	Uncharacterized protein	na	4-amino-4-deoxy-L-arabinose-phosphoundecaprenol flippase subunit ArnF	na
huge_phage_2159_curated_complete_163	330	1	1	1	1	1	1	1	1	1	1	1	0	0	0	0	0	0	0	0	0	0	0	0	0	0	0	0	0	0	0	0	0	0	0	0	0	0	0	11	na	Crystal structure of Sortase B complexed with Gly3	class B sortase	class B sortase based on HP3334 gene structure comparsion using online foldseek, BLASTp returns class D sortase though
huge_phage_2159_curated_complete_225	158	1	1	1	1	1	1	1	1	1	1	1	0	0	0	0	0	0	0	0	0	0	0	0	0	0	0	0	0	0	0	0	0	0	0	0	0	0	0	11	Putative transcriptional regulator	X-ray structure of PadR-like Transcription factor from bacteroid fragilis	mecA-type methicillin resistance repressor MecI	na
huge_phage_2159_curated_complete_242	262	1	1	1	1	1	1	1	1	1	1	1	0	0	0	0	0	0	0	0	0	0	0	0	0	0	0	0	0	0	0	0	0	0	0	0	0	0	0	11	na	na	na	na
huge_phage_2159_curated_complete_316	244	1	1	1	1	1	1	1	1	1	1	1	0	0	0	0	0	0	0	0	0	0	0	0	0	0	0	0	0	0	0	0	0	0	0	0	0	0	0	11	na	Sortase A from Streptococcus agalactiae, residues 79-247	Bacterial Sortase Class D	class A sortase based on HP3334 gene structure comparsion using online foldseek,
huge_phage_2159_curated_complete_332	150	1	1	1	1	1	1	1	1	1	1	1	0	0	0	0	0	0	0	0	0	0	0	0	0	0	0	0	0	0	0	0	0	0	0	0	0	0	0	11	HNHc domain containing protein	CRYSTAL STRUCTURE OF A PUTATIVE LIPID BINDING PROTEIN (GSU0061) FROM GEOBACTER SULFURREDUCENS PCA AT 1.80 A RESOLUTION	WXG100 family type VII secretion target	na
huge_phage_2159_curated_complete_379	75	1	1	1	1	1	1	1	1	1	1	2	0	0	0	0	0	0	0	0	0	0	0	0	0	0	0	0	0	0	0	0	0	0	0	0	0	0	0	11	DUF4314 domain-containing protein	Solution structure of the CUL7-CPH domain from Homo Sapiens; Northeast Structural Genomics Consortium target HT1.	na	na
huge_phage_2159_curated_complete_57	115	1	1	1	1	1	1	1	1	1	1	1	0	0	0	0	0	0	0	0	0	0	0	0	0	0	0	0	0	0	0	0	0	0	0	0	0	0	0	11	na	na	na	na
huge_phage_2159_curated_complete_95	166	1	1	1	1	1	1	1	1	1	1	1	0	0	0	0	0	0	0	0	0	0	0	0	0	0	0	0	0	0	0	0	0	0	0	0	0	0	0	11	na	na	na	na
huge_phage_2782_curated_complete_125	765	1	1	1	1	1	1	1	1	1	1	1	0	0	0	0	0	0	0	0	0	0	0	0	0	0	0	0	0	0	0	0	0	0	0	0	0	0	0	11	DNA 3'-5' helicase (EC 5.6.2.4)	Crystal structure of T. fusca Cas3-AMPPNP	CRISPR-associated helicase/endonuclease Cas3	Cas3
huge_phage_2782_curated_complete_156	219	1	1	1	1	1	1	1	1	1	1	1	0	0	0	0	0	0	0	0	0	0	0	0	0	0	0	0	0	0	0	0	0	0	0	0	0	0	0	11	na	na	na	na
huge_phage_2782_curated_complete_191	174	3	2	3	2	2	3	1	2	2	2	3	0	0	0	0	0	0	0	0	0	0	0	0	0	0	0	0	0	0	0	0	0	0	0	0	0	0	0	11	na	na	na	na
huge_phage_2782_curated_complete_340	204	1	1	1	1	1	1	1	1	1	1	1	0	0	0	0	0	0	0	0	0	0	0	0	0	0	0	0	0	0	0	0	0	0	0	0	0	0	0	11	na	na	na	na
huge_phage_3334_curated_complete_363	226	1	1	1	1	1	1	1	1	1	1	1	0	0	0	0	0	0	0	0	0	0	0	0	0	0	0	0	0	0	0	0	0	0	0	0	0	0	0	11	na	na	na	na
huge_phage_4400_curated_complete_343	380	0	0	0	0	1	1	0	1	1	0	1	1	0	0	0	1	1	0	0	0	0	0	0	0	0	0	1	0	0	0	0	0	0	1	0	0	0	1	11	Adenine-specific methyltransferase	na	na	na
huge_phage_4614_curated_complete_368	822	2	1	1	1	1	1	1	1	1	1	1	0	0	0	0	0	0	0	0	0	0	0	0	0	0	0	0	0	0	0	0	0	0	0	0	0	0	0	11	DNA topoisomerase (EC 5.6.2.1)	Structure of E. coli topoisomerase III in complex with an 8-base single stranded oligonucleotide. Frozen in glycerol pH 8.0	DNA topoisomerase III	na
huge_phage_4614_curated_complete_382	213	1	1	1	1	1	1	1	1	1	1	1	0	0	0	0	0	0	0	0	0	0	0	0	0	0	0	0	0	0	0	0	0	0	0	0	0	0	0	11	na	na	na	na
huge_phage_5020_curated_complete_106	353	1	1	1	1	1	1	1	1	1	1	1	0	0	0	0	0	0	0	0	0	0	0	0	0	0	0	0	0	0	0	0	0	0	0	0	0	0	0	11	na	na	na	na
huge_phage_5020_curated_complete_218	245	1	1	1	1	1	1	1	1	1	1	1	0	0	0	0	0	0	0	0	0	0	0	0	0	0	0	0	0	0	0	0	0	0	0	0	0	0	0	11	na	na	na	na
huge_phage_5020_curated_complete_316	236	1	1	1	1	1	1	1	1	1	1	1	0	0	0	0	0	0	0	0	0	0	0	0	0	0	0	0	0	0	0	0	0	0	0	0	0	0	0	11	na	X-ray structure of sortase C from Clostridium perfringens SM101	Bacterial Sortase Class D	class C sortase based on HP3334 gene it is more likely a class C sortase but could be class A sortase as well according to PDB comparison
huge_phage_5020_curated_complete_364	433	1	1	1	1	1	1	1	1	1	1	1	0	0	0	0	0	0	0	0	0	0	0	0	0	0	0	0	0	0	0	0	0	0	0	0	0	0	0	11	na	na	na	na
huge_phage_5020_curated_complete_53	267	1	1	1	1	1	1	1	1	1	1	1	0	0	0	0	0	0	0	0	0	0	0	0	0	0	0	0	0	0	0	0	0	0	0	0	0	0	0	11	Metallophosphatase domain protein	Dbr1 in complex with synthetic branched RNA analog	na	na
huge_phage_5020_curated_complete_83	744	1	1	1	1	1	1	1	1	1	1	1	0	0	0	0	0	0	0	0	0	0	0	0	0	0	0	0	0	0	0	0	0	0	0	0	0	0	0	11	na	na	na	na
huge_phage_5020_curated_complete_87	157	1	1	1	1	1	1	1	1	1	1	1	0	0	0	0	0	0	0	0	0	0	0	0	0	0	0	0	0	0	0	0	0	0	0	0	0	0	0	11	Terminase small subunit	na	na	na
huge_phage_5175_316	89	1	1	1	1	1	1	1	1	1	1	1	0	0	0	0	0	0	0	0	0	0	0	0	0	0	0	0	0	0	0	0	0	0	0	0	0	0	0	11	na	na	na	na
huge_phage_5175_50	154	1	1	1	1	1	1	1	1	1	1	1	0	0	0	0	0	0	0	0	0	0	0	0	0	0	0	0	0	0	0	0	0	0	0	0	0	0	0	11	na	na	na	na
huge_phage_5175_68	268	2	2	2	2	2	2	2	1	2	2	2	0	0	0	0	0	0	0	0	0	0	0	0	0	0	0	0	0	0	0	0	0	0	0	0	0	0	0	11	HAD-superfamily phosphatase subfamily IIIC	X-ray Crystal Structure of the Hypothetical Phosphotyrosine Phosphatase MDP-1 of the Haloacid Dehalogenase Superfamily	HAD-IA family hydrolase	na
huge_phage_7428_curated_complete_157	254	1	1	1	1	1	1	1	1	1	1	1	0	0	0	0	0	0	0	0	0	0	0	0	0	0	0	0	0	0	0	0	0	0	0	0	0	0	0	11	na	Crystal Structure of CRISPR-associated Protein	type I-C CRISPR-associated protein Cas5c	Cas5
huge_phage_7795_302	282	1	1	1	1	1	1	1	1	1	1	1	0	0	0	0	0	0	0	0	0	0	0	0	0	0	0	0	0	0	0	0	0	0	0	0	0	0	0	11	HD domain-containing protein	A metazoan ortholog of SpoT hydrolyzes ppGpp and plays a role in starvation responses	na	na
huge_phage_8811_curated_complete_226	82	1	1	1	1	1	1	1	1	1	1	1	0	0	0	0	0	0	0	0	0	0	0	0	0	0	0	0	0	0	0	0	0	0	0	0	0	0	0	11	Uncharacterized protein	X11 PTB DOMAIN	na	na
ERR11029134_NODE_10_curated_complete_65	125	0	0	0	0	0	0	0	0	0	0	0	1	1	1	0	0	0	1	0	0	0	0	1	1	0	0	0	0	0	0	0	1	0	0	1	0	1	1	10	Uncharacterized protein	na	na	na
ERR11475043_NODE_132_curated_complete_150	626	1	1	0	1	1	1	1	1	1	1	1	0	0	0	0	0	0	0	0	0	0	0	0	0	0	0	0	0	0	0	0	0	0	0	0	0	0	0	10	na	na	na	na
ERR11475043_NODE_132_curated_complete_239	230	1	0	1	1	1	1	1	1	1	1	1	0	0	0	0	0	0	0	0	0	0	0	0	0	0	0	0	0	0	0	0	0	0	0	0	0	0	0	10	na	na	na	na
ERR11475043_NODE_132_curated_complete_35	234	1	1	1	1	1	0	1	1	1	1	1	0	0	0	0	0	0	0	0	0	0	0	0	0	0	0	0	0	0	0	0	0	0	0	0	0	0	0	10	na	na	na	na
ERR11475043_NODE_132_curated_complete_38	156	1	2	1	1	1	0	2	1	1	1	1	0	0	0	0	0	0	0	0	0	0	0	0	0	0	0	0	0	0	0	0	0	0	0	0	0	0	0	10	Bacterial PH domain protein	Crystal structure of a duf1696 family protein with a pleckstrin-homology domain (shew_0819) from shewanella loihica pv-4 at 2.00 A resolution	na	na
ERR11475043_NODE_132_curated_complete_42	181	1	1	0	1	1	1	1	1	1	1	1	0	0	0	0	0	0	0	0	0	0	0	0	0	0	0	0	0	0	0	0	0	0	0	0	0	0	0	10	ORF 135	Toxin-Antitoxin module from Streptococcus pneumoniae	na	na
ERR11475043_NODE_132_curated_complete_60	364	1	1	1	1	1	1	0	1	1	1	1	0	0	0	0	0	0	0	0	0	0	0	0	0	0	0	0	0	0	0	0	0	0	0	0	0	0	0	10	na	Crystal structure of A Helicobacter pylori proinflammatory kinase CtkA	na	na
ERR14838501_contig_2618_length_403255_complete_10	440	0	1	1	1	1	1	1	1	1	1	1	0	0	0	0	0	0	0	0	0	0	0	0	0	0	0	0	0	0	0	0	0	0	0	0	0	0	0	10	na	na	na	na
ERR14838501_contig_2618_length_403255_complete_15	109	1	1	1	0	1	1	1	1	1	1	1	0	0	0	0	0	0	0	0	0	0	0	0	0	0	0	0	0	0	0	0	0	0	0	0	0	0	0	10	na	na	na	na
ERR14838501_contig_2618_length_403255_complete_161	166	0	1	1	1	0	0	1	1	0	1	1	0	0	0	0	0	0	0	0	0	0	0	1	0	0	0	0	1	1	0	0	0	0	0	0	0	0	0	10	na	na	na	na
ERR14838501_contig_2618_length_403255_complete_171	66	0	1	1	1	1	1	1	1	1	1	1	0	0	0	0	0	0	0	0	0	0	0	0	0	0	0	0	0	0	0	0	0	0	0	0	0	0	0	10	na	na	na	na
ERR14838501_contig_2618_length_403255_complete_173	278	0	1	1	1	1	1	1	1	1	1	1	0	0	0	0	0	0	0	0	0	0	0	0	0	0	0	0	0	0	0	0	0	0	0	0	0	0	0	10	na	na	na	na
ERR14838501_contig_2618_length_403255_complete_249	211	0	1	1	1	1	1	1	1	1	1	1	0	0	0	0	0	0	0	0	0	0	0	0	0	0	0	0	0	0	0	0	0	0	0	0	0	0	0	10	na	na	na	na
ERR14838501_contig_2618_length_403255_complete_303	247	0	1	1	1	1	1	1	1	1	1	1	0	0	0	0	0	0	0	0	0	0	0	0	0	0	0	0	0	0	0	0	0	0	0	0	0	0	0	10	na	na	na	na
ERR14838501_contig_2618_length_403255_complete_304	109	0	1	1	1	1	1	1	1	1	1	1	0	0	0	0	0	0	0	0	0	0	0	0	0	0	0	0	0	0	0	0	0	0	0	0	0	0	0	10	WYL domain containing protein	na	na	na
ERR14838501_contig_2618_length_403255_complete_322	750	1	1	0	1	1	1	1	1	1	1	1	0	0	0	0	0	0	0	0	0	0	0	0	0	0	0	0	0	0	0	0	0	0	0	0	0	0	0	10	na	na	na	na
ERR14838501_contig_2618_length_403255_complete_44	438	1	1	0	1	1	1	1	1	1	1	1	0	0	0	0	0	0	0	0	0	0	0	0	0	0	0	0	0	0	0	0	0	0	0	0	0	0	0	10	na	na	na	na
ERR14838502_contig_1965_length_377046_start_adj_complete_206	464	0	0	0	0	0	0	0	0	0	0	0	0	0	0	1	1	0	0	1	0	0	1	0	0	0	1	0	0	0	1	1	0	1	1	0	1	0	0	10	ATPase domain protein	The walker-type atpase paby2304 of pyrococcus abyssi	XrtA/PEP-CTERM system-associated ATPase	na
ERR14838502_contig_1965_length_377046_start_adj_complete_340	73	0	0	0	0	0	0	0	0	0	0	0	0	0	0	1	0	0	0	0	1	1	0	0	1	1	0	0	0	0	0	1	1	0	0	1	1	1	0	10	na	na	na	na
huge_phage_2159_curated_complete_200	341	0	1	1	1	1	1	1	1	1	1	1	0	0	0	0	0	0	0	0	0	0	0	0	0	0	0	0	0	0	0	0	0	0	0	0	0	0	0	10	na	na	na	na
huge_phage_2782_curated_complete_94	251	1	0	1	1	1	1	1	1	1	1	1	0	0	0	0	0	0	0	0	0	0	0	0	0	0	0	0	0	0	0	0	0	0	0	0	0	0	0	10	PfWMP3_05	na	na	na
huge_phage_2979_curated_complete_246	198	0	0	1	1	0	0	1	1	1	1	1	0	0	0	0	0	0	0	0	0	0	1	0	0	0	1	0	0	0	0	1	0	0	0	0	0	0	0	10	Retinoblastoma-binding protein-like protein	na	na	na
huge_phage_2979_curated_complete_340	460	0	0	0	0	0	0	0	0	0	0	0	0	0	0	0	0	0	1	0	1	0	1	1	0	0	1	0	1	1	0	1	1	0	1	0	0	0	0	10	na	na	na	na
huge_phage_3334_curated_complete_127	89	1	1	1	1	1	1	0	1	1	1	1	0	0	0	0	0	0	0	0	0	0	0	0	0	0	0	0	0	0	0	0	0	0	0	0	0	0	0	10	na	na	na	na
huge_phage_5020_curated_complete_32	259	1	1	1	1	1	0	1	1	1	1	1	0	0	0	0	0	0	0	0	0	0	0	0	0	0	0	0	0	0	0	0	0	0	0	0	0	0	0	10	na	Crystal structure of human Dbp5 in complex with Nup214	na	na
huge_phage_5020_curated_complete_4	332	1	1	0	1	1	1	1	1	1	1	1	0	0	0	0	0	0	0	0	0	0	0	0	0	0	0	0	0	0	0	0	0	0	0	0	0	0	0	10	na	na	na	na
huge_phage_7428_curated_complete_79	354	0	1	1	1	1	1	1	1	1	1	1	0	0	0	0	0	0	0	0	0	0	0	0	0	0	0	0	0	0	0	0	0	0	0	0	0	0	0	10	na	na	na	na
ERR11029134_NODE_10_curated_complete_92	96	0	0	1	0	0	0	0	0	0	0	0	1	1	1	0	0	1	0	0	0	0	0	0	1	0	0	1	0	0	0	0	0	0	0	1	0	1	0	9	DUF2157 domain-containing protein	na	na	na
ERR11475043_NODE_132_curated_complete_102	298	1	0	0	1	1	1	1	1	1	1	1	0	0	0	0	0	0	0	0	0	0	0	0	0	0	0	0	0	0	0	0	0	0	0	0	0	0	0	9	na	na	na	na
ERR11475043_NODE_132_curated_complete_214	177	1	1	1	1	1	0	1	1	1	1	0	0	0	0	0	0	0	0	0	0	0	0	0	0	0	0	0	0	0	0	0	0	0	0	0	0	0	0	9	na	na	na	na
ERR11475043_NODE_132_curated_complete_36	177	1	1	0	1	1	0	1	1	1	1	1	0	0	0	0	0	0	0	0	0	0	0	0	0	0	0	0	0	0	0	0	0	0	0	0	0	0	0	9	na	na	na	na
ERR11475043_NODE_132_curated_complete_51	267	1	0	1	1	1	1	0	1	1	1	1	0	0	0	0	0	0	0	0	0	0	0	0	0	0	0	0	0	0	0	0	0	0	0	0	0	0	0	9	na	na	na	na
ERR11475043_NODE_132_curated_complete_53	142	1	0	1	1	1	1	0	1	1	1	1	0	0	0	0	0	0	0	0	0	0	0	0	0	0	0	0	0	0	0	0	0	0	0	0	0	0	0	9	na	na	na	na
ERR11475043_NODE_132_curated_complete_7	112	1	0	1	1	1	1	0	1	1	1	1	0	0	0	0	0	0	0	0	0	0	0	0	0	0	0	0	0	0	0	0	0	0	0	0	0	0	0	9	Gp491	Crystal structure of an uncharacterized protein from Methanothermobacter thermautotrophicus	type III secretion chaperone SycN	na
ERR14838501_contig_2618_length_403255_complete_137	423	0	1	0	1	1	1	1	1	1	1	1	0	0	0	0	0	0	0	0	0	0	0	0	0	0	0	0	0	0	0	0	0	0	0	0	0	0	0	9	na	DNA Polymerase- damaged DNA complex	DNA polymerase IV	na
ERR14838501_contig_2618_length_403255_complete_138	91	0	1	0	1	1	1	1	1	1	1	1	0	0	0	0	0	0	0	0	0	0	0	0	0	0	0	0	0	0	0	0	0	0	0	0	0	0	0	9	Uncharacterized protein	na	na	na
ERR14838501_contig_2618_length_403255_complete_158	144	0	1	1	1	1	0	1	1	1	1	1	0	0	0	0	0	0	0	0	0	0	0	0	0	0	0	0	0	0	0	0	0	0	0	0	0	0	0	9	Uncharacterized protein	Cryo-EM structure of the 48-nm repeat doublet microtubule from mouse sperm	SPI-1 type III secretion system protein SpaM	na
ERR14838501_contig_2618_length_403255_complete_159	129	0	1	1	1	1	0	1	1	1	1	1	0	0	0	0	0	0	0	0	0	0	0	0	0	0	0	0	0	0	0	0	0	0	0	0	0	0	0	9	Uncharacterized protein	na	na	na
ERR14838501_contig_2618_length_403255_complete_163	239	0	1	1	1	1	0	1	1	1	1	1	0	0	0	0	0	0	0	0	0	0	0	0	0	0	0	0	0	0	0	0	0	0	0	0	0	0	0	9	na	na	na	na
ERR14838501_contig_2618_length_403255_complete_164	186	0	1	1	1	1	0	1	1	1	1	1	0	0	0	0	0	0	0	0	0	0	0	0	0	0	0	0	0	0	0	0	0	0	0	0	0	0	0	9	Uncharacterized protein	Crystal structure of predicted hydrolase of haloacid dehalogenase-like superfamily (NP_295428.1) from Deinococcus radiodurans at 1.66 A resolution	magnesium-dependent phosphatase-1	na
ERR14838501_contig_2618_length_403255_complete_168	64	0	1	1	1	1	0	1	1	1	1	1	0	0	0	0	0	0	0	0	0	0	0	0	0	0	0	0	0	0	0	0	0	0	0	0	0	0	0	9	Uncharacterized protein	na	bagremycin/ferroverdin biosynthesis copper chaperon BagZ/FevE	na
ERR14838501_contig_2618_length_403255_complete_300	380	0	1	1	1	1	0	1	1	1	1	1	0	0	0	0	0	0	0	0	0	0	0	0	0	0	0	0	0	0	0	0	0	0	0	0	0	0	0	9	na	na	na	na
ERR14838501_contig_2618_length_403255_complete_301	60	0	1	1	1	1	1	1	1	1	0	1	0	0	0	0	0	0	0	0	0	0	0	0	0	0	0	0	0	0	0	0	0	0	0	0	0	0	0	9	Uncharacterized protein	ORF 55 from Sulfolobus islandicus rudivirus 1	lasso peptide biosynthesis PqqD family chaperone	na
ERR14838501_contig_2618_length_403255_complete_4	189	0	1	1	1	0	1	1	1	1	1	1	0	0	0	0	0	0	0	0	0	0	0	0	0	0	0	0	0	0	0	0	0	0	0	0	0	0	0	9	Uncharacterized protein	na	na	na
ERR14838501_contig_2618_length_403255_complete_6	236	0	1	1	1	0	1	1	1	1	1	1	0	0	0	0	0	0	0	0	0	0	0	0	0	0	0	0	0	0	0	0	0	0	0	0	0	0	0	9	na	na	na	na
ERR14838501_contig_2618_length_403255_complete_8	338	0	1	1	1	0	1	1	1	1	1	1	0	0	0	0	0	0	0	0	0	0	0	0	0	0	0	0	0	0	0	0	0	0	0	0	0	0	0	9	na	na	na	na
ERR14838502_contig_1965_length_377046_start_adj_complete_97	91	0	0	0	0	0	0	0	0	0	0	0	0	0	0	1	0	0	0	1	0	0	1	1	0	0	1	0	0	0	1	1	0	1	0	0	1	0	0	9	Uncharacterized protein	na	na	na
ERR9250082_NODE_7_curated_complete_52	222	0	0	0	0	0	0	0	0	0	0	0	0	0	0	0	0	0	0	1	0	0	1	1	0	0	0	0	1	1	1	1	0	1	0	0	1	0	0	9	na	na	na	na
huge_phage_2159_curated_complete_11	56	0	0	1	1	1	1	1	1	1	1	1	0	0	0	0	0	0	0	0	0	0	0	0	0	0	0	0	0	0	0	0	0	0	0	0	0	0	0	9	na	na	na	na
huge_phage_2782_curated_complete_29	81	0	0	1	1	1	1	1	1	1	1	1	0	0	0	0	0	0	0	0	0	0	0	0	0	0	0	0	0	0	0	0	0	0	0	0	0	0	0	9	Uncharacterized protein	Cryo-EM structure of the transcriptional Mediator	protein UsfY	na
huge_phage_2782_curated_complete_364	254	0	0	1	1	1	1	1	1	1	1	1	0	0	0	0	0	0	0	0	0	0	0	0	0	0	0	0	0	0	0	0	0	0	0	0	0	0	0	9	GmrSD restriction endonucleases N-terminal domain-containing protein	na	na	na
huge_phage_2782_curated_complete_367	248	0	1	1	1	0	1	1	1	1	1	1	0	0	0	0	0	0	0	0	0	0	0	0	0	0	0	0	0	0	0	0	0	0	0	0	0	0	0	9	na	na	na	na
huge_phage_5020_curated_complete_30	295	0	1	1	1	1	0	1	1	1	1	1	0	0	0	0	0	0	0	0	0	0	0	0	0	0	0	0	0	0	0	0	0	0	0	0	0	0	0	9	na	na	na	na
huge_phage_7428_curated_complete_75	127	0	1	1	1	1	0	1	1	1	1	1	0	0	0	0	0	0	0	0	0	0	0	0	0	0	0	0	0	0	0	0	0	0	0	0	0	0	0	9	na	na	na	na
ERR11029134_NODE_10_curated_complete_93	390	0	0	0	0	0	0	0	0	0	0	0	1	1	1	0	0	1	0	0	0	0	0	0	1	0	0	1	0	0	0	0	0	0	0	1	0	1	0	8	na	Crystal structure of A Helicobacter pylori proinflammatory kinase CtkA	type II toxin-antitoxin system HipA family toxin YjjJ	na
ERR11473358_NODE_44_curated_complete_243	56	0	0	1	0	0	1	0	0	0	0	0	0	1	0	0	0	0	1	0	0	0	0	0	0	1	0	0	1	1	0	0	0	0	0	0	0	0	1	8	Uncharacterized protein	Solution NMR Structure of Putative Lipoprotein from Pseudomonas syringae Gene Locus PSPTO2350. Northeast Structural Genomics Target PsR76A.	trimethoprim-resistant dihydrofolate reductase DfrB	na
ERR11475043_NODE_132_curated_complete_197	281	1	1	0	1	1	1	1	1	1	0	0	0	0	0	0	0	0	0	0	0	0	0	0	0	0	0	0	0	0	0	0	0	0	0	0	0	0	0	8	na	na	type-F conjugative transfer system pilin acetylase TraX	na
ERR11475043_NODE_132_curated_complete_198	282	1	0	1	1	1	0	0	1	1	1	1	0	0	0	0	0	0	0	0	0	0	0	0	0	0	0	0	0	0	0	0	0	0	0	0	0	0	0	8	Putative endonuclease	na	na	na
ERR11475043_NODE_132_curated_complete_242	296	1	0	1	0	1	1	1	1	1	1	0	0	0	0	0	0	0	0	0	0	0	0	0	0	0	0	0	0	0	0	0	0	0	0	0	0	0	0	8	na	na	na	na
ERR14838501_contig_2618_length_403255_complete_372	42	0	1	1	1	1	1	1	1	1	0	0	0	0	0	0	0	0	0	0	0	0	0	0	0	0	0	0	0	0	0	0	0	0	0	0	0	0	0	8	Uncharacterized protein	na	exodeoxyribonuclease VII small subunit	na
ERR4334199_NODE_10_curated_complete_151	168	0	0	1	0	0	0	0	0	0	0	0	0	0	0	1	1	0	0	0	1	0	1	0	0	0	1	0	0	0	0	0	0	1	1	0	0	0	0	8	na	na	na	na
ERR4334199_NODE_10_curated_complete_293	207	0	0	1	1	0	0	0	0	0	0	0	0	0	0	0	1	0	0	1	0	0	0	1	1	0	0	0	1	0	0	0	0	0	1	0	0	0	0	8	na	na	na	na
ERR4334199_NODE_10_curated_complete_32	63	0	0	0	0	0	0	0	0	0	0	0	0	0	0	1	1	1	0	0	1	0	0	0	0	0	0	0	0	0	1	0	1	0	1	0	0	1	0	8	na	na	na	na
huge_phage_2782_curated_complete_187	206	0	0	0	1	1	1	1	1	1	1	1	0	0	0	0	0	0	0	0	0	0	0	0	0	0	0	0	0	0	0	0	0	0	0	0	0	0	0	8	na	na	na	na
huge_phage_2782_curated_complete_188	144	0	0	0	1	1	1	1	1	1	1	1	0	0	0	0	0	0	0	0	0	0	0	0	0	0	0	0	0	0	0	0	0	0	0	0	0	0	0	8	na	na	na	na
huge_phage_2782_curated_complete_189	99	0	0	0	1	1	1	1	1	1	1	1	0	0	0	0	0	0	0	0	0	0	0	0	0	0	0	0	0	0	0	0	0	0	0	0	0	0	0	8	Uncharacterized protein	na	na	na
huge_phage_3334_curated_complete_136	220	0	0	0	1	1	1	1	1	1	1	1	0	0	0	0	0	0	0	0	0	0	0	0	0	0	0	0	0	0	0	0	0	0	0	0	0	0	0	8	HTH cro/C1-type domain-containing protein	na	na	na
huge_phage_4614_curated_complete_272	206	1	1	0	2	1	1	1	1	1	0	0	0	0	0	0	0	0	0	0	0	0	0	0	0	0	0	0	0	0	0	0	0	0	0	0	0	0	0	8	na	na	na	na
huge_phage_7795_362	199	0	1	0	0	1	1	0	1	1	1	1	0	0	0	0	0	0	0	0	0	0	1	0	0	0	0	0	0	0	0	0	0	0	0	0	0	0	0	8	na	na	na	na
ERR11029134_NODE_10_curated_complete_275	121	0	0	0	0	0	0	0	0	0	0	0	1	1	1	0	0	1	0	0	0	1	0	0	1	0	0	0	0	0	0	0	1	0	0	0	0	0	0	7	Uncharacterized protein	na	na	na
ERR11029134_NODE_10_curated_complete_292	147	0	0	0	0	0	0	0	0	0	0	0	1	0	1	0	0	1	0	0	0	1	0	0	1	0	0	0	0	0	0	0	0	0	0	0	0	1	1	7	na	na	na	na
ERR11473975_NODE_51_curated_circular_115	116	0	0	0	0	0	0	0	0	0	0	0	0	0	0	1	0	0	1	0	0	1	0	0	1	0	0	0	0	0	0	0	0	0	0	1	0	1	1	7	na	na	na	na
ERR11475043_NODE_132_curated_complete_161	346	1	0	1	1	1	0	0	0	1	1	1	0	0	0	0	0	0	0	0	0	0	0	0	0	0	0	0	0	0	0	0	0	0	0	0	0	0	0	7	na	na	na	na
ERR11475043_NODE_132_curated_complete_167	81	1	0	0	1	1	1	1	1	1	0	0	0	0	0	0	0	0	0	0	0	0	0	0	0	0	0	0	0	0	0	0	0	0	0	0	0	0	0	7	na	na	na	na
ERR11475043_NODE_132_curated_complete_192	138	1	0	0	1	1	0	0	1	1	1	1	0	0	0	0	0	0	0	0	0	0	0	0	0	0	0	0	0	0	0	0	0	0	0	0	0	0	0	7	Uncharacterized protein	na	na	na
ERR11475043_NODE_132_curated_complete_2	1193	1	0	0	1	1	1	1	1	1	0	0	0	0	0	0	0	0	0	0	0	0	0	0	0	0	0	0	0	0	0	0	0	0	0	0	0	0	0	7	na	na	na	VirB6
ERR11475043_NODE_132_curated_complete_231	336	1	0	0	1	1	1	0	1	1	0	1	0	0	0	0	0	0	0	0	0	0	0	0	0	0	0	0	0	0	0	0	0	0	0	0	0	0	0	7	na	na	na	na
ERR11475043_NODE_132_curated_complete_236	76	1	0	0	1	1	1	0	1	1	0	1	0	0	0	0	0	0	0	0	0	0	0	0	0	0	0	0	0	0	0	0	0	0	0	0	0	0	0	7	na	na	na	na
ERR11475043_NODE_132_curated_complete_243	163	1	0	1	0	1	1	0	1	1	1	0	0	0	0	0	0	0	0	0	0	0	0	0	0	0	0	0	0	0	0	0	0	0	0	0	0	0	0	7	Acetyltransferase	CRYSTAL STRUCTURE OF A putative acetyltransferase of the GNAT family (DDE_3044) FROM DESULFOVIBRIO DESULFURICANS SUBSP. AT 1.85 A RESOLUTION	AAC(6')-Ia family aminoglycoside 6'-N-acetyltransferase AacA49	na
ERR11475043_NODE_132_curated_complete_246	170	1	1	0	1	0	1	1	0	0	1	1	0	0	0	0	0	0	0	0	0	0	0	0	0	0	0	0	0	0	0	0	0	0	0	0	0	0	0	7	na	na	na	na
ERR11475043_NODE_132_curated_complete_3	597	1	0	0	1	1	1	1	1	1	0	0	0	0	0	0	0	0	0	0	0	0	0	0	0	0	0	0	0	0	0	0	0	0	0	0	0	0	0	7	na	na	na	na
ERR11566171_NODE_22_curated_complete_71	144	0	0	0	0	0	0	0	0	0	0	0	0	0	1	0	0	0	1	0	1	0	0	1	1	1	0	0	1	0	0	0	0	0	0	0	0	0	0	7	na	na	na	na
ERR14838501_contig_2618_length_403255_complete_156	162	0	1	0	1	1	0	1	1	1	1	0	0	0	0	0	0	0	0	0	0	0	0	0	0	0	0	0	0	0	0	0	0	0	0	0	0	0	0	7	na	na	na	na
ERR14838501_contig_2618_length_403255_complete_363	82	0	1	1	0	0	1	1	0	0	0	0	0	0	0	0	0	0	0	0	0	0	0	0	0	1	0	0	1	1	0	0	0	0	0	0	0	0	0	7	na	na	na	na
ERR14838502_contig_1965_length_377046_start_adj_complete_181	89	0	0	0	0	0	0	0	0	0	0	0	0	0	0	1	1	0	0	0	1	0	1	0	0	0	1	0	0	0	0	0	0	1	1	0	0	0	0	7	DUF732 domain-containing protein	Crystal structure of DNA-bound DUX4-HD2	na	na
ERR4341740_NODE_51_curated_complete_301	111	0	0	0	0	0	0	0	0	0	0	0	0	0	0	0	0	1	0	0	0	1	0	1	0	0	0	1	1	1	0	0	1	0	0	0	0	0	0	7	na	na	na	na
ERR6395353_NODE_54_curated_final_335	168	0	0	0	0	0	0	0	0	0	0	0	0	0	1	1	1	0	1	0	0	0	0	0	0	0	1	0	1	0	0	0	0	0	1	0	0	0	0	7	na	na	na	na
ERR9250082_NODE_7_curated_complete_306	214	0	0	0	0	0	0	0	0	0	0	0	0	0	0	0	0	0	0	1	0	0	1	0	0	1	1	0	1	0	1	1	0	0	0	0	0	0	0	7	na	na	na	na
ERR9250082_NODE_7_curated_complete_59	123	0	0	0	0	0	0	0	0	0	0	0	0	0	0	0	1	0	1	1	0	0	0	0	0	0	1	0	0	0	1	0	0	1	0	0	1	0	0	7	na	na	na	na
huge_phage_1888_curated_final_113	418	0	0	0	0	1	1	0	0	1	1	1	0	0	0	0	0	0	0	0	0	1	0	0	0	0	2	0	0	0	0	0	0	0	0	0	0	0	0	7	na	na	na	na
huge_phage_2159_curated_complete_146	623	0	0	1	1	1	0	0	1	1	1	1	0	0	0	0	0	0	0	0	0	0	0	0	0	0	0	0	0	0	0	0	0	0	0	0	0	0	0	7	na	na	na	na
huge_phage_2159_curated_complete_256	133	0	0	1	1	0	1	0	1	1	1	1	0	0	0	0	0	0	0	0	0	0	0	0	0	0	0	0	0	0	0	0	0	0	0	0	0	0	0	7	na	na	na	na
huge_phage_2159_curated_complete_373	374	0	0	1	0	1	2	1	1	1	1	0	0	0	0	0	0	0	0	0	0	0	0	0	0	0	0	0	0	0	0	0	0	0	0	0	0	0	0	7	Transposase	Cryo-EM structure of the TnpB-omegaRNA-target DNA ternary complex	RNA-guided DNA endonuclease TnpB-like	na
huge_phage_2782_curated_complete_136	451	1	0	0	1	0	1	0	1	0	0	1	0	0	0	0	0	0	0	0	0	0	0	0	0	0	0	0	0	0	0	0	0	0	0	0	0	1	2	7	Restriction endonuclease	na	na	na
huge_phage_3334_curated_complete_281	149	0	1	1	1	1	1	1	0	1	0	0	0	0	0	0	0	0	0	0	0	0	0	0	0	0	0	0	0	0	0	0	0	0	0	0	0	0	0	7	na	na	na	na
huge_phage_3334_curated_complete_82	566	0	0	2	0	1	1	1	1	1	1	0	0	0	0	0	0	0	0	0	0	0	0	0	0	0	0	0	0	0	0	0	0	0	0	0	0	0	0	7	na	na	na	na
huge_phage_3584_curated_final_349	84	0	0	0	0	0	0	0	0	0	0	0	0	0	0	0	0	0	0	0	0	0	0	1	0	0	1	1	1	1	0	0	0	0	1	1	0	0	0	7	Restriction endonuclease	na	na	na
huge_phage_4378_curated_complete_45	136	0	0	0	0	0	0	0	0	0	0	0	0	0	0	0	0	0	0	1	0	0	1	0	0	1	1	0	1	0	1	1	0	0	0	0	0	0	0	7	Uncharacterized protein	Structure of the human MSL3 chromo-barrel domain at 2.5 Angstrom resolution	50S ribosomal protein L19	na
SRR12101443_NODE_2_curated_complete_28	87	0	0	0	0	0	0	0	0	0	0	0	1	0	0	0	0	1	0	0	0	0	0	0	0	0	0	0	0	1	0	1	0	0	1	0	1	0	1	7	na	na	na	na
ERR11473975_NODE_51_curated_circular_254	79	0	0	0	0	0	0	0	0	0	0	0	0	0	0	0	1	1	0	0	0	0	0	1	0	0	1	0	0	0	0	0	0	0	0	1	0	0	1	6	Uncharacterized protein	Structure of the yeast mitochondrial ribosome - Class A	bacteriophage spanin2 family protein	na
ERR11473975_NODE_51_curated_circular_255	79	0	0	0	0	0	0	0	0	0	0	0	0	0	0	0	1	1	0	0	0	0	0	1	0	0	1	0	0	0	0	0	0	0	0	1	0	0	1	6	Uncharacterized protein	Crystal structure of phyllogen, a phyllody inducing effector protein of phytoplasma.	YibL family ribosome-associated protein	na
ERR11475043_NODE_132_curated_complete_21	491	1	1	1	0	0	1	0	1	0	1	0	0	0	0	0	0	0	0	0	0	0	0	0	0	0	0	0	0	0	0	0	0	0	0	0	0	0	0	6	na	na	na	na
ERR11475043_NODE_132_curated_complete_27	338	1	1	1	0	0	0	1	0	0	1	1	0	0	0	0	0	0	0	0	0	0	0	0	0	0	0	0	0	0	0	0	0	0	0	0	0	0	0	6	DUF4352 domain-containing protein	na	na	na
ERR11475043_NODE_132_curated_complete_80	195	1	0	0	0	0	0	0	0	0	0	0	0	0	0	0	0	0	0	0	0	0	0	0	0	1	0	0	0	1	0	1	0	0	1	0	1	0	0	6	Polynucleotide kinase PNKP phosphatase domain-containing protein	X-ray Crystal Structure of the Hypothetical Phosphotyrosine Phosphatase MDP-1 of the Haloacid Dehalogenase Superfamily	magnesium-dependent phosphatase-1	na
ERR14838502_contig_1965_length_377046_start_adj_complete_56	61	0	0	0	0	0	0	0	0	0	0	0	0	0	0	1	0	0	0	1	0	0	1	0	0	1	0	0	0	0	1	0	0	0	0	0	1	0	0	6	na	na	na	na
ERR4334199_NODE_10_curated_complete_292	183	0	0	0	0	0	0	0	0	0	0	0	1	0	0	0	1	0	0	1	0	0	0	1	0	0	0	0	1	0	1	0	0	0	0	0	0	0	0	6	na	na	na	na
huge_phage_2159_curated_complete_189	144	1	1	1	1	0	0	1	0	0	0	1	0	0	0	0	0	0	0	0	0	0	0	0	0	0	0	0	0	0	0	0	0	0	0	0	0	0	0	6	na	na	na	na
huge_phage_2159_curated_complete_6	102	0	0	1	0	1	0	1	0	1	1	1	0	0	0	0	0	0	0	0	0	0	0	0	0	0	0	0	0	0	0	0	0	0	0	0	0	0	0	6	na	na	na	na
huge_phage_2782_curated_complete_81	290	1	0	0	1	1	0	1	1	1	0	0	0	0	0	0	0	0	0	0	0	0	0	0	0	0	0	0	0	0	0	0	0	0	0	0	0	0	0	6	na	na	na	na
huge_phage_2979_curated_complete_305	108	0	0	0	0	0	0	0	0	0	0	0	0	0	0	0	1	0	0	0	0	0	1	0	0	0	1	0	0	0	1	0	1	0	0	0	0	1	0	6	na	na	na	na
huge_phage_5020_curated_complete_199	342	0	0	0	0	0	0	1	0	0	0	0	1	1	0	1	0	0	0	0	0	0	1	0	0	0	0	0	0	0	0	0	0	0	1	0	0	0	0	6	na	na	na	na
huge_phage_7795_76	169	1	1	1	0	0	0	1	0	0	1	1	0	0	0	0	0	0	0	0	0	0	0	0	0	0	0	0	0	0	0	0	0	0	0	0	0	0	0	6	Uncharacterized protein	NMR structure of Rpa0253 from Rhodopseudomonas palustris. Northeast structural genomics consortium target RpR3	hypothetical protein	na
NZ_DXPE01000001_curated_complete_66	145	0	0	0	0	0	0	0	0	0	0	0	0	0	0	0	0	0	0	1	0	0	1	0	0	0	0	0	1	0	1	0	0	0	0	0	0	1	2	6	E4 ORFB	DEINOCOCCUS RADIODURANS ISDRA2 TRANSPOSASE Y132F MUTANT COMPLEXED WITH LEFT END RECOGNITION AND CLEAVAGE SITE	IS200/IS605 family transposase	na
ERR11029134_NODE_10_curated_complete_89	139	0	0	0	0	0	1	0	0	0	0	0	1	1	1	0	0	0	0	0	0	0	0	0	1	0	0	0	0	0	0	0	0	0	0	0	0	0	0	5	Uncharacterized protein	Crystal Structure of the ISHp608 Transposase	IS200/IS605 family transposase	na
ERR11473358_NODE_44_curated_complete_244	130	0	0	0	0	0	0	0	0	0	0	0	0	1	0	0	0	0	1	0	0	0	0	0	0	1	0	0	1	0	0	0	0	0	0	0	0	0	1	5	Uncharacterized protein	Solution structure of the TUDOR domain of PHD finger protein 20-like 1 [Homo sapiens]	na	na
ERR11473358_NODE_44_curated_complete_286	238	0	0	0	0	0	0	0	0	0	0	0	0	1	0	0	0	0	0	0	0	0	1	0	1	0	0	1	0	0	0	0	0	0	2	0	0	0	0	5	na	na	na	na
ERR11473975_NODE_51_curated_circular_210	422	0	0	0	0	0	1	0	0	0	0	0	0	0	0	0	0	1	1	0	1	0	0	0	0	0	0	0	0	0	0	0	0	0	0	0	0	0	1	5	na	na	na	na
ERR11475043_NODE_132_curated_complete_32	123	1	1	1	1	0	0	0	1	0	0	0	0	0	0	0	0	0	0	0	0	0	0	0	0	0	0	0	0	0	0	0	0	0	0	0	0	0	0	5	Uncharacterized protein	Crystal structure of deep network hallucinated protein 0217	na	na
ERR14838501_contig_2618_length_403255_complete_371	52	0	1	1	1	0	0	1	0	0	0	1	0	0	0	0	0	0	0	0	0	0	0	0	0	0	0	0	0	0	0	0	0	0	0	0	0	0	0	5	na	na	na	na
ERR14838502_contig_1965_length_377046_start_adj_complete_231	240	0	0	0	0	0	0	0	0	0	0	0	0	0	0	1	0	0	0	0	0	0	0	1	0	0	1	0	1	1	0	0	0	0	0	0	0	0	0	5	Uncharacterized protein	na	na	na
huge_phage_3334_curated_complete_186	156	0	0	0	0	1	0	1	0	0	1	0	0	0	0	0	0	0	0	0	0	0	0	0	0	0	0	0	0	1	1	0	0	0	0	0	0	0	0	5	Macro domain-containing protein	Structure of a Protein of Unknown Function from Bacteroides thetaiotaomicron.	ADP-ribose-binding protein	na
huge_phage_3584_curated_final_16	151	0	0	0	0	0	0	0	0	0	0	0	0	0	0	0	0	0	0	0	0	0	0	1	0	1	0	0	1	0	1	0	0	0	1	0	0	0	0	5	DUF3990 domain-containing protein	Structure of the Pseudomonas putida RES-Xre toxin-antitoxin complex	na	na
huge_phage_3584_curated_final_17	151	0	0	0	0	0	0	0	0	0	0	0	0	0	0	0	0	0	0	0	0	0	0	1	0	1	0	0	1	0	1	0	0	0	1	0	0	0	0	5	na	na	na	na
huge_phage_4378_curated_complete_362	269	0	0	0	0	0	0	0	0	0	0	0	0	0	0	0	0	0	0	0	0	0	0	0	0	1	0	0	0	1	0	1	0	0	1	0	1	0	0	5	na	na	na	na
huge_phage_8498_curated_complete_50	449	0	0	0	0	0	0	1	0	0	0	0	0	0	0	1	0	0	0	0	0	0	0	0	0	0	0	0	1	1	0	0	0	1	0	0	0	0	0	5	Transposase	Cryo-EM structure of the AsCas12f-HKRA-sgRNAS3-5v7-target DNA	RNA-guided DNA endonuclease domain-containing protein	na
SRR18461266_NODE_121_curated_complete_263	81	0	0	0	0	0	0	0	0	0	0	0	0	0	0	0	0	0	1	0	0	0	0	1	0	0	0	0	1	0	1	0	0	1	0	0	0	0	0	5	na	na	na	na
ERR11029134_NODE_10_curated_complete_332	68	0	0	0	0	0	0	0	0	0	0	0	1	0	0	0	0	0	1	0	1	0	0	0	0	0	0	0	0	0	0	0	0	0	0	0	0	1	0	4	na	na	na	na
ERR11473975_NODE_51_curated_circular_143	89	0	0	0	0	0	1	0	0	0	0	0	0	0	0	0	0	1	0	0	1	0	0	0	0	0	0	0	0	0	0	0	0	0	0	0	0	0	1	4	na	na	na	na
ERR11473975_NODE_51_curated_circular_144	486	0	0	0	0	0	1	0	0	0	0	0	0	0	0	0	0	1	0	0	1	0	0	0	0	0	0	0	0	0	0	0	0	0	0	0	0	0	1	4	N-acetylmuramoyl-L-alanine amidase	na	na	na
ERR11473975_NODE_51_curated_circular_145	110	0	0	0	0	0	1	0	0	0	0	0	0	0	0	0	0	1	0	0	1	0	0	0	0	0	0	0	0	0	0	0	0	0	0	0	0	0	1	4	na	na	na	na
ERR11473975_NODE_51_curated_circular_146	59	0	0	0	0	0	1	0	0	0	0	0	0	0	0	0	0	1	0	0	1	0	0	0	0	0	0	0	0	0	0	0	0	0	0	0	0	0	1	4	Uncharacterized protein	na	CD1375 family phage-related protein	na
ERR11473975_NODE_51_curated_circular_147	34	0	0	0	0	0	1	0	0	0	0	0	0	0	0	0	0	1	0	0	1	0	0	0	0	0	0	0	0	0	0	0	0	0	0	0	0	0	1	4	Uncharacterized protein	na	CD1375 family phage-related protein	na
ERR11473975_NODE_51_curated_circular_148	110	0	0	0	0	0	1	0	0	0	0	0	0	0	0	0	0	1	0	0	1	0	0	0	0	0	0	0	0	0	0	0	0	0	0	0	0	0	1	4	Uncharacterized protein	na	na	na
ERR11473975_NODE_51_curated_circular_149	404	0	0	0	0	0	1	0	0	0	0	0	0	0	0	0	0	1	0	0	1	0	0	0	0	0	0	0	0	0	0	0	0	0	0	0	0	0	1	4	Reverse transcriptase domain-containing protein	Structure of a Thermostable Group II Intron Reverse Transcriptase with Template-Primer and Its Functional and Evolutionary Implications (RT/Duplex (Nat))	group II intron reverse transcriptase/maturase	reverse transcriptase
ERR11473975_NODE_51_curated_circular_150	181	0	0	0	0	0	1	0	0	0	0	0	0	0	0	0	0	1	0	0	1	0	0	0	0	0	0	0	0	0	0	0	0	0	0	0	0	0	1	4	Avd-like protein	CRYSTAL STRUCTURE OF A PROTEIN WITH UNKNOWN FUNCTION FROM S23 RIBOSOMAL PROTEIN FAMILY (BT_0352) FROM BACTEROIDES THETAIOTAOMICRON VPI-5482 AT 1.70 A RESOLUTION	four helix bundle protein	na
ERR11473975_NODE_51_curated_circular_151	301	0	0	0	0	0	1	0	0	0	0	0	0	0	0	0	0	1	0	0	1	0	0	0	0	0	0	0	0	0	0	0	0	0	0	0	0	0	1	4	Major capsid protein	na	na	na
ERR11473975_NODE_51_curated_circular_152	209	0	0	0	0	0	1	0	0	0	0	0	0	0	0	0	0	1	0	0	1	0	0	0	0	0	0	0	0	0	0	0	0	0	0	0	0	0	1	4	na	na	na	na
ERR11473975_NODE_51_curated_circular_153	142	0	0	0	0	0	1	0	0	0	0	0	0	0	0	0	0	1	0	0	1	0	0	0	0	0	0	0	0	0	0	0	0	0	0	0	0	0	1	4	Uncharacterized protein	na	na	na
ERR11473975_NODE_51_curated_circular_154	741	0	0	0	0	0	1	0	0	0	0	0	0	0	0	0	0	1	0	0	1	0	0	0	0	0	0	0	0	0	0	0	0	0	0	0	0	0	1	4	Tail protein	na	na	na
ERR11473975_NODE_51_curated_circular_155	124	0	0	0	0	0	1	0	0	0	0	0	0	0	0	0	0	1	0	0	1	0	0	0	0	0	0	0	0	0	0	0	0	0	0	0	0	0	1	4	Uncharacterized protein	Tail tip conformation 2 of phage lambda tail	na	na
ERR11473975_NODE_51_curated_circular_156	1562	0	0	0	0	0	1	0	0	0	0	0	0	0	0	0	0	1	0	0	1	0	0	0	0	0	0	0	0	0	0	0	0	0	0	0	0	0	1	4	na	na	na	na
ERR11473975_NODE_51_curated_circular_157	152	0	0	0	0	0	1	0	0	0	0	0	0	0	0	0	0	1	0	0	1	0	0	0	0	0	0	0	0	0	0	0	0	0	0	0	0	0	1	4	Uncharacterized protein	na	na	na
ERR11473975_NODE_51_curated_circular_158	110	0	0	0	0	0	1	0	0	0	0	0	0	0	0	0	0	1	0	0	1	0	0	0	0	0	0	0	0	0	0	0	0	0	0	0	0	0	1	4	Uncharacterized protein	na	na	na
ERR11473975_NODE_51_curated_circular_159	142	0	0	0	0	0	1	0	0	0	0	0	0	0	0	0	0	1	0	0	1	0	0	0	0	0	0	0	0	0	0	0	0	0	0	0	0	0	1	4	Tail tube protein	Structure of the bacteriophage lambda tail tube	conserved hypothetical phage tail region protein	na
ERR11473975_NODE_51_curated_circular_160	135	0	0	0	0	0	1	0	0	0	0	0	0	0	0	0	0	1	0	0	1	0	0	0	0	0	0	0	0	0	0	0	0	0	0	0	0	0	1	4	Uncharacterized protein	Crystal structure of the tail terminator protein from phage lambda (gpU-D74A)	reactive chlorine resistance periplasmic protein RclB	na
ERR11473975_NODE_51_curated_circular_161	178	0	0	0	0	0	1	0	0	0	0	0	0	0	0	0	0	1	0	0	1	0	0	0	0	0	0	0	0	0	0	0	0	0	0	0	0	0	1	4	HK97 gp10 family phage protein	na	HK97-gp10 family putative phage morphogenesis protein	na
ERR11473975_NODE_51_curated_circular_162	136	0	0	0	0	0	1	0	0	0	0	0	0	0	0	0	0	1	0	0	1	0	0	0	0	0	0	0	0	0	0	0	0	0	0	0	0	0	1	4	Uncharacterized protein	Pseudomonas phage E217 neck (portal, head-to-tail connector, collar and gateway proteins)	phage head closure protein	na
ERR11473975_NODE_51_curated_circular_163	106	0	0	0	0	0	1	0	0	0	0	0	0	0	0	0	0	1	0	0	1	0	0	0	0	0	0	0	0	0	0	0	0	0	0	0	0	0	1	4	Tail connector protein	Crystal structure of bacteriophage HK97 gp6	head-tail connector protein	na
ERR11473975_NODE_51_curated_circular_164	309	0	0	0	0	0	1	0	0	0	0	0	0	0	0	0	0	1	0	0	1	0	0	0	0	0	0	0	0	0	0	0	0	0	0	0	0	0	1	4	Gp6.1	Crystal structure of virus-like particle from Pyrococcus furiosus	N4-gp56 family major capsid protein	na
ERR11473975_NODE_51_curated_circular_165	196	0	0	0	0	0	1	0	0	0	0	0	0	0	0	0	0	1	0	0	1	0	0	0	0	0	0	0	0	0	0	0	0	0	0	0	0	0	1	4	na	na	na	na
ERR11473975_NODE_51_curated_circular_166	486	0	0	0	0	0	1	0	0	0	0	0	0	0	0	0	0	1	0	0	1	0	0	0	0	0	0	0	0	0	0	0	0	0	0	0	0	0	1	4	Portal	gp6/gp15/gp16 connector complex of bacteriophage SPP1	phage portal protein	na
ERR11473975_NODE_51_curated_circular_167	545	0	0	0	0	0	1	0	0	0	0	0	0	0	0	0	0	1	0	0	1	0	0	0	0	0	0	0	0	0	0	0	0	0	0	0	0	0	1	4	Terminase	na	na	na
ERR11473975_NODE_51_curated_circular_168	134	0	0	0	0	0	1	0	0	0	0	0	0	0	0	0	0	1	0	0	1	0	0	0	0	0	0	0	0	0	0	0	0	0	0	0	0	0	1	4	DUF5067 domain-containing protein	Structure of a putative lipoprotein from Staphylococcus aureus subsp. aureus NCTC 8325	SLAP domain	na
ERR11473975_NODE_51_curated_circular_169	252	0	0	0	0	0	1	0	0	0	0	0	0	0	0	0	0	1	0	0	1	0	0	0	0	0	0	0	0	0	0	0	0	0	0	0	0	0	1	4	Integrase	Crystal Structure of the N-terminal Catalytic Domain of TP901-1 Integrase	IS607 family transposase	na
ERR11473975_NODE_51_curated_circular_170	70	0	0	0	0	0	1	0	0	0	0	0	0	0	0	0	0	1	0	0	1	0	0	0	0	0	0	0	0	0	0	0	0	0	0	0	0	0	1	4	Helix-turn-helix domain Cro/C1-type transcriptional regulator	THE COMPLEX BETWEEN PHAGE 434 REPRESSION DNA-BINDING DOMAIN AND OPERATOR SITE OR3: STRUCTURAL DIFFERENCES BETWEEN CONSENSUS AND NON-CONSENSUS HALF-SITES	type II toxin-antitoxin system Y4mF family antitoxin	na
ERR11473975_NODE_51_curated_circular_172	88	0	0	0	0	0	1	0	0	0	0	0	0	0	0	0	0	1	0	0	1	0	0	0	0	0	0	0	0	0	0	0	0	0	0	0	0	0	1	4	Uncharacterized protein	na	na	na
ERR11473975_NODE_51_curated_circular_176	237	0	0	0	0	0	1	0	0	0	0	0	0	0	0	0	0	1	0	0	1	0	0	0	0	0	0	0	0	0	0	0	0	0	0	0	0	0	1	4	Terminase small subunit	na	na	na
ERR11473975_NODE_51_curated_circular_178	61	0	0	0	0	0	1	0	0	0	0	0	0	0	0	0	0	1	0	0	1	0	0	0	0	0	0	0	0	0	0	0	0	0	0	0	0	0	1	4	na	na	na	na
ERR11473975_NODE_51_curated_circular_182	498	0	0	0	0	0	1	0	0	0	0	0	0	0	0	0	0	1	0	0	1	0	0	0	0	0	0	0	0	0	0	0	0	0	0	0	0	0	1	4	Putative DNA primase	Structure of Full-Length AsfvPrimPol in Complex-Form	hypothetical protein	na
ERR11473975_NODE_51_curated_circular_184	153	0	0	0	0	0	1	0	0	0	0	0	0	0	0	0	0	1	0	0	1	0	0	0	0	0	0	0	0	0	0	0	0	0	0	0	0	0	1	4	PemK-like protein	MazF from S. aureus crystal form III, C2221, 2.7 A	endoribonuclease MazF	na
ERR11473975_NODE_51_curated_circular_185	56	0	0	0	0	0	1	0	0	0	0	0	0	0	0	0	0	1	0	0	1	0	0	0	0	0	0	0	0	0	0	0	0	0	0	0	0	0	1	4	Uncharacterized protein	na	na	na
ERR11473975_NODE_51_curated_circular_186	196	0	0	0	0	0	1	0	0	0	0	0	0	0	0	0	0	1	0	0	1	0	0	0	0	0	0	0	0	0	0	0	0	0	0	0	0	0	1	4	DUF6273 domain-containing protein	na	na	na
ERR11473975_NODE_51_curated_circular_187	67	0	0	0	0	0	1	0	0	0	0	0	0	0	0	0	0	1	0	0	1	0	0	0	0	0	0	0	0	0	0	0	0	0	0	0	0	0	1	4	Uncharacterized protein	na	na	na
ERR11473975_NODE_51_curated_circular_188	265	0	0	0	0	0	1	0	0	0	0	0	0	0	0	0	0	1	0	0	1	0	0	0	0	0	0	0	0	0	0	0	0	0	0	0	0	0	1	4	DNA primase/helicase	Structure of Deep-Sea Phage NrS-1 Primase-Polymerase N300 in complex with magnesium and pyrophosphate	na	na
ERR11473975_NODE_51_curated_circular_189	99	0	0	0	0	0	1	0	0	0	0	0	0	0	0	0	0	1	0	0	1	0	0	0	0	0	0	0	0	0	0	0	0	0	0	0	0	0	1	4	RNaseLS-like protein	G1 ORF67 / Staphyloccus aureus sigmaA domain 4 complex	phage transcriptional regulator, RinA family	na
ERR11473975_NODE_51_curated_circular_190	84	0	0	0	0	0	1	0	0	0	0	0	0	0	0	0	0	1	0	0	1	0	0	0	0	0	0	0	0	0	0	0	0	0	0	0	0	0	1	4	Uncharacterized protein	na	na	na
ERR11473975_NODE_51_curated_circular_191	139	0	0	0	0	0	1	0	0	0	0	0	0	0	0	0	0	1	0	0	1	0	0	0	0	0	0	0	0	0	0	0	0	0	0	0	0	0	1	4	Uncharacterized protein	na	na	na
ERR11473975_NODE_51_curated_circular_192	246	0	0	0	0	0	1	0	0	0	0	0	0	0	0	0	0	1	0	0	1	0	0	0	0	0	0	0	0	0	0	0	0	0	0	0	0	0	1	4	Uncharacterized protein	Crystal structure of Thymidylate Synthase X (ThyX) from Helicobacter pylori with FAD and dUMP at 2.31A resolution	FAD-dependent thymidylate synthase	na
ERR11473975_NODE_51_curated_circular_193	131	0	0	0	0	0	1	0	0	0	0	0	0	0	0	0	0	1	0	0	1	0	0	0	0	0	0	0	0	0	0	0	0	0	0	0	0	0	1	4	Uncharacterized protein	na	na	na
ERR11473975_NODE_51_curated_circular_194	187	0	0	0	0	0	1	0	0	0	0	0	0	0	0	0	0	1	0	0	1	0	0	0	0	0	0	0	0	0	0	0	0	0	0	0	0	0	1	4	Putative helicase	na	integrating conjugative element relaxase, PFGI-1 class	na
ERR11473975_NODE_51_curated_circular_195	114	0	0	0	0	0	1	0	0	0	0	0	0	0	0	0	0	1	0	0	1	0	0	0	0	0	0	0	0	0	0	0	0	0	0	0	0	0	1	4	MazG Predicted pyrophosphatase	Crystal structure of the Bacillus-conserved MazG protein, a nucleotide pyrophosphohydrolase	phosphoribosyl-ATP diphosphatase	na
ERR11473975_NODE_51_curated_circular_196	188	0	0	0	0	0	1	0	0	0	0	0	0	0	0	0	0	1	0	0	1	0	0	0	0	0	0	0	0	0	0	0	0	0	0	0	0	0	1	4	Uncharacterized protein	na	na	na
ERR11473975_NODE_51_curated_circular_197	89	0	0	0	0	0	1	0	0	0	0	0	0	0	0	0	0	1	0	0	1	0	0	0	0	0	0	0	0	0	0	0	0	0	0	0	0	0	1	4	Nucelotide kinase	Cryo-EM structure of the ATP-bound Vps4 mutant-E233Q complex with Vta1 (masked)	TcpD family membrane protein	na
ERR11473975_NODE_51_curated_circular_198	170	0	0	0	0	0	1	0	0	0	0	0	0	0	0	0	0	1	0	0	1	0	0	0	0	0	0	0	0	0	0	0	0	0	0	0	0	0	1	4	Uncharacterized protein	na	na	na
ERR11473975_NODE_51_curated_circular_199	80	0	0	0	0	0	1	0	0	0	0	0	0	0	0	0	0	1	0	0	1	0	0	0	0	0	0	0	0	0	0	0	0	0	0	0	0	0	1	4	Uncharacterized protein	Crystal structure of a yeast TFIIA/TBP/DNA complex	permease prefix domain 1	na
ERR11473975_NODE_51_curated_circular_201	345	0	0	0	0	0	1	0	0	0	0	0	0	0	0	0	0	1	0	0	1	0	0	0	0	0	0	0	0	0	0	0	0	0	0	0	0	0	1	4	COG5377 Phage-related protein, predicted endonuclease	Crystal Structure of an alkaline exonuclease (LHK-Exo) from Laribacter hongkongensis	na	na
ERR11473975_NODE_51_curated_circular_202	836	0	0	0	0	0	1	0	0	0	0	0	0	0	0	0	0	1	0	0	1	0	0	0	0	0	0	0	0	0	0	0	0	0	0	0	0	0	1	4	DNA polymerase	na	na	na
ERR11473975_NODE_51_curated_circular_203	468	0	0	0	0	0	1	0	0	0	0	0	0	0	0	0	0	1	0	0	1	0	0	0	0	0	0	0	0	0	0	0	0	0	0	0	0	0	1	4	Putative type III restriction protein res subunit	Yeast TFIIH in the contracted state within the pre-initiation complex	DNA repair helicase rad25	na
ERR11473975_NODE_51_curated_circular_204	133	0	0	0	0	0	1	0	0	0	0	0	0	0	0	0	0	1	0	0	1	0	0	0	0	0	0	0	0	0	0	0	0	0	0	0	0	0	1	4	Holliday junction resolvase RecU	Crystal Structure of Penicillin-binding protein-related factor A from Bacillus Subtilis.	Holliday junction resolvase RecU	na
ERR11473975_NODE_51_curated_circular_205	74	0	0	0	0	0	1	0	0	0	0	0	0	0	0	0	0	1	0	0	1	0	0	0	0	0	0	0	0	0	0	0	0	0	0	0	0	0	1	4	Uncharacterized protein	Cryo-electron microscopy reconstruction of the Plasmodium falciparum 80S ribosome bound to P-tRNA	na	na
ERR11473975_NODE_51_curated_circular_206	222	0	0	0	0	0	1	0	0	0	0	0	0	0	0	0	0	1	0	0	1	0	0	0	0	0	0	0	0	0	0	0	0	0	0	0	0	0	1	4	GEWL-like protein	Structure of Lytic Transglycosylase MltC from Escherichia coli at 2.3 A resolution.	type III secretion system invasion protein IagB	na
ERR11473975_NODE_51_curated_circular_207	54	0	0	0	0	0	1	0	0	0	0	0	0	0	0	0	0	1	0	0	1	0	0	0	0	0	0	0	0	0	0	0	0	0	0	0	0	0	1	4	Nuclear pore complex component	na	na	na
ERR11473975_NODE_51_curated_circular_208	114	0	0	0	0	0	1	0	0	0	0	0	0	0	0	0	0	1	0	0	1	0	0	0	0	0	0	0	0	0	0	0	0	0	0	0	0	0	1	4	Uncharacterized protein	Crystal structure of the DNA-binding domain of Oct-1 bound to DNA as a dimer	RstR family transcriptional repressor	na
ERR11473975_NODE_51_curated_circular_209	120	0	0	0	0	0	1	0	0	0	0	0	0	0	0	0	0	1	0	0	1	0	0	0	0	0	0	0	0	0	0	0	0	0	0	0	0	0	1	4	Helix-turn-helix domain protein	The N-terminal DNA binding domain of SinR from Bacillus subtilis	RstR family transcriptional repressor	na
ERR11473975_NODE_51_curated_circular_52	262	0	0	0	0	0	0	0	0	0	0	0	0	0	0	0	0	1	0	0	0	0	0	0	1	0	0	1	0	0	0	0	0	0	0	0	0	0	1	4	na	Crystal Structure of PI3Kalpha in complex with fragment 8	na	na
ERR11475043_NODE_132_curated_complete_103	117	1	0	0	1	0	0	0	1	0	0	1	0	0	0	0	0	0	0	0	0	0	0	0	0	0	0	0	0	0	0	0	0	0	0	0	0	0	0	4	WYL domain containing protein	na	na	na
ERR11475043_NODE_132_curated_complete_189	70	1	1	0	0	1	0	1	0	0	0	0	0	0	0	0	0	0	0	0	0	0	0	0	0	0	0	0	0	0	0	0	0	0	0	0	0	0	0	4	Uncharacterized protein	Citrus V-ATPase State 1, H in contact with subunits AB	integrating conjugative element protein	na
ERR11475043_NODE_132_curated_complete_408	125	1	1	0	0	1	0	1	0	0	0	0	0	0	0	0	0	0	0	0	0	0	0	0	0	0	0	0	0	0	0	0	0	0	0	0	0	0	0	4	na	na	na	na
ERR11475043_NODE_132_curated_complete_55	268	1	0	1	0	0	1	0	0	0	0	1	0	0	0	0	0	0	0	0	0	0	0	0	0	0	0	0	0	0	0	0	0	0	0	0	0	0	0	4	na	na	na	na
ERR11475043_NODE_132_curated_complete_99	130	1	0	0	0	1	0	0	0	1	0	1	0	0	0	0	0	0	0	0	0	0	0	0	0	0	0	0	0	0	0	0	0	0	0	0	0	0	0	4	na	na	na	na
ERR11566171_NODE_22_curated_complete_213	71	0	0	0	0	0	0	0	0	0	0	0	0	0	1	0	0	0	0	0	0	1	0	0	1	0	0	0	0	0	0	0	1	0	0	0	0	0	0	4	na	na	na	na
ERR14838501_contig_2618_length_403255_complete_117	590	0	1	1	0	0	0	0	0	0	1	1	0	0	0	0	0	0	0	0	0	0	0	0	0	0	0	0	0	0	0	0	0	0	0	0	0	0	0	4	na	na	na	na
ERR14838501_contig_2618_length_403255_complete_2	92	0	1	0	0	0	1	0	1	0	0	1	0	0	0	0	0	0	0	0	0	0	0	0	0	0	0	0	0	0	0	0	0	0	0	0	0	0	0	4	Uncharacterized protein	na	na	na
ERR14838501_contig_2618_length_403255_complete_337	93	0	1	1	0	0	0	0	0	0	1	1	0	0	0	0	0	0	0	0	0	0	0	0	0	0	0	0	0	0	0	0	0	0	0	0	0	0	0	4	na	na	na	na
ERR4341740_NODE_51_curated_complete_200	79	0	0	0	0	0	1	0	0	0	0	0	0	0	0	0	0	1	0	0	1	0	0	0	0	0	0	0	0	0	0	0	0	0	0	0	0	0	1	4	Uncharacterized protein	na	na	na
huge_phage_1554_curated_complete_194	106	0	0	0	0	0	1	0	0	0	0	0	0	0	0	0	0	1	0	0	1	0	0	0	0	0	0	0	0	0	0	0	0	0	0	0	0	0	1	4	na	na	na	na
huge_phage_1554_curated_complete_319	300	0	0	0	0	0	0	0	0	0	0	0	0	0	0	0	0	0	0	0	1	0	1	0	1	0	0	0	0	0	0	0	0	0	1	0	0	0	0	4	Uncharacterized protein	na	na	na
huge_phage_2159_curated_complete_12	43	0	0	1	0	0	1	1	0	0	1	0	0	0	0	0	0	0	0	0	0	0	0	0	0	0	0	0	0	0	0	0	0	0	0	0	0	0	0	4	na	na	na	na
huge_phage_2159_curated_complete_251	1216	0	1	1	0	0	0	0	0	0	1	1	0	0	0	0	0	0	0	0	0	0	0	0	0	0	0	0	0	0	0	0	0	0	0	0	0	0	0	4	na	na	na	VirB6
huge_phage_2782_curated_complete_137	325	0	0	0	1	0	1	0	1	0	0	1	0	0	0	0	0	0	0	0	0	0	0	0	0	0	0	0	0	0	0	0	0	0	0	0	0	0	0	4	Putative endonuclease	na	na	na
huge_phage_2782_curated_complete_168	202	0	1	1	1	0	0	1	0	0	0	0	0	0	0	0	0	0	0	0	0	0	0	0	0	0	0	0	0	0	0	0	0	0	0	0	0	0	0	4	na	na	na	na
huge_phage_3334_curated_complete_126	184	0	0	0	0	1	1	1	0	1	0	0	0	0	0	0	0	0	0	0	0	0	0	0	0	0	0	0	0	0	0	0	0	0	0	0	0	0	0	4	na	na	na	na
huge_phage_3334_curated_complete_176	214	0	0	0	0	1	1	0	0	1	0	1	0	0	0	0	0	0	0	0	0	0	0	0	0	0	0	0	0	0	0	0	0	0	0	0	0	0	0	4	Methyl-accepting chemotaxis protein	HUMAN PI3KDELTA IN COMPLEX WITH COMPOUND 2F	type III secretion protein HrpB7	na
huge_phage_3334_curated_complete_88	84	0	0	0	0	1	0	1	1	1	0	0	0	0	0	0	0	0	0	0	0	0	0	0	0	0	0	0	0	0	0	0	0	0	0	0	0	0	0	4	na	na	na	na
huge_phage_3584_curated_final_132	165	0	0	0	0	0	0	0	0	0	0	0	0	0	0	0	0	0	0	0	0	0	0	1	0	0	0	0	1	1	0	0	0	0	0	1	0	0	0	4	Uncharacterized protein	na	na	na
huge_phage_3584_curated_final_228	95	0	0	0	0	0	0	0	0	0	0	0	0	0	0	0	0	0	0	0	0	0	0	1	0	1	0	0	1	1	0	0	0	0	0	0	0	0	0	4	na	na	na	na
huge_phage_3584_curated_final_332	169	0	0	0	0	0	0	0	0	0	0	0	0	0	0	0	0	0	0	2	0	0	0	1	0	0	0	0	1	0	0	0	0	0	1	0	0	0	0	4	na	na	na	na
huge_phage_3742_curated_complete_275	499	0	0	0	0	0	0	0	0	0	0	0	0	0	0	0	0	0	0	0	0	0	0	0	1	0	0	0	0	0	0	0	1	0	0	1	1	0	0	4	na	Subtomogram average of the human Sec61-TRAP-OSTA-translocon	na	na
huge_phage_4380_curated_final_271	161	0	0	0	0	0	0	0	0	0	0	0	0	0	0	0	0	0	0	0	0	0	1	0	0	0	1	0	0	0	0	1	0	1	0	0	0	0	0	4	na	na	na	na
huge_phage_5175_101	144	0	0	0	0	0	1	0	1	1	1	0	0	0	0	0	0	0	0	0	0	0	0	0	0	0	0	0	0	0	0	0	0	0	0	0	0	0	0	4	na	na	na	na
huge_phage_7795_328	336	0	0	0	1	1	0	0	0	1	1	0	0	0	0	0	0	0	0	0	0	0	0	0	0	0	0	0	0	0	0	0	0	0	0	0	0	0	0	4	na	na	na	na
huge_phage_8550_curated_final_293	108	0	0	0	0	0	0	0	0	0	0	0	0	0	0	0	0	1	0	0	0	0	0	0	0	0	1	0	0	1	0	0	0	1	0	0	0	0	0	4	na	na	na	na
huge_phage_8550_curated_final_82	64	0	0	0	0	0	0	0	0	0	0	0	0	0	0	0	0	0	0	0	0	0	0	0	0	0	0	0	1	1	0	1	0	0	0	0	1	0	0	4	na	na	na	na
ERR11029134_NODE_10_curated_complete_200	82	0	0	0	0	0	0	0	0	0	0	0	1	0	0	0	0	0	0	0	0	0	0	0	0	0	0	1	0	0	0	0	0	0	0	0	1	0	0	3	na	na	na	na
ERR11029134_NODE_10_curated_complete_207	224	0	0	0	0	0	0	0	0	0	0	0	1	0	0	0	0	0	0	0	0	0	1	0	0	0	0	0	0	0	0	0	0	1	0	0	0	0	0	3	Putative thioredoxin-like protein	Crystal structure of thioredoxin O2 from Arabidopsis thaliana in oxidized state	PedC/BrcD family bacteriocin maturation disulfide isomerase	na
ERR11473358_NODE_44_curated_complete_287	251	0	0	0	0	0	0	0	0	0	0	0	0	1	0	0	0	0	0	0	0	0	0	0	0	1	0	0	0	0	0	0	0	0	0	0	0	1	0	3	na	na	na	na
ERR11473358_NODE_44_curated_complete_316	210	0	0	0	0	0	0	0	0	0	0	0	0	1	0	0	0	0	0	0	0	0	0	0	0	0	1	0	0	0	0	0	0	0	0	1	0	0	0	3	Prepilin type IV endopeptidase peptidase domain-containing protein	na	na	na
ERR11473358_NODE_44_curated_complete_317	620	0	0	0	0	0	0	0	0	0	0	0	0	1	0	0	0	0	0	0	0	0	0	0	0	0	0	0	0	1	0	0	0	0	0	1	0	0	0	3	na	Crystal structure of an archaeal aaa+ atpase (sso1545) from sulfolobus solfataricus p2 at 2.00 A resolution	na	na
ERR11473975_NODE_51_curated_circular_173	119	0	0	0	0	0	1	0	0	0	0	0	0	0	0	0	0	0	0	0	1	0	0	0	0	0	0	0	0	0	0	0	0	0	0	0	0	0	1	3	Uncharacterized protein	na	na	na
ERR11473975_NODE_51_curated_circular_174	115	0	0	0	0	0	1	0	0	0	0	0	0	0	0	0	0	0	0	0	1	0	0	0	0	0	0	0	0	0	0	0	0	0	0	0	0	0	1	3	Uncharacterized protein	na	na	na
ERR11473975_NODE_51_curated_circular_175	96	0	0	0	0	0	1	0	0	0	0	0	0	0	0	0	0	0	0	0	1	0	0	0	0	0	0	0	0	0	0	0	0	0	0	0	0	0	1	3	Uncharacterized protein	STIL binding to the Polo-box domain 3 of PLK4 regulates centriole duplication	na	na
ERR11473975_NODE_51_curated_circular_299	250	0	0	0	0	0	0	0	0	0	0	0	0	0	0	1	0	0	0	0	0	0	0	0	0	0	0	0	0	0	1	0	0	0	0	0	0	0	1	3	na	Structural basis for the interaction of Pyk2 PAT domain with paxillin LD motifs	na	na
ERR11473975_NODE_51_curated_circular_302	362	0	0	0	0	0	0	0	0	0	0	0	0	0	0	0	0	0	0	0	0	0	0	0	1	0	1	0	0	0	0	0	0	0	0	0	0	0	1	3	na	Three-dimensional structure of DNA sequence specificity (S) subunit of a type I restriction-modification enzyme and its functional implications	na	na
ERR11473975_NODE_51_curated_circular_303	40	0	0	0	0	0	0	0	0	0	0	0	0	0	0	0	1	0	0	0	0	0	0	0	1	0	0	0	0	0	0	0	0	0	0	0	0	0	1	3	na	na	na	na
ERR11475043_NODE_132_curated_complete_104	304	1	0	0	0	0	0	0	0	0	0	0	0	0	0	0	0	0	0	0	0	0	0	0	0	0	0	0	0	0	0	0	0	0	0	0	0	1	1	3	Restriction endonuclease	na	na	na
ERR11475043_NODE_132_curated_complete_201	292	1	0	0	0	0	0	0	0	0	1	1	0	0	0	0	0	0	0	0	0	0	0	0	0	0	0	0	0	0	0	0	0	0	0	0	0	0	0	3	na	na	na	na
ERR11475043_NODE_132_curated_complete_217	35	1	1	0	0	1	0	0	0	0	0	0	0	0	0	0	0	0	0	0	0	0	0	0	0	0	0	0	0	0	0	0	0	0	0	0	0	0	0	3	Transposase	na	na	na
ERR11475043_NODE_132_curated_complete_25	31	1	0	0	0	1	0	1	0	0	0	0	0	0	0	0	0	0	0	0	0	0	0	0	0	0	0	0	0	0	0	0	0	0	0	0	0	0	0	3	na	na	na	na
ERR11475043_NODE_132_curated_complete_273	64	1	1	0	1	0	0	0	0	0	0	0	0	0	0	0	0	0	0	0	0	0	0	0	0	0	0	0	0	0	0	0	0	0	0	0	0	0	0	3	na	na	na	na
ERR11475043_NODE_132_curated_complete_59	76	1	1	1	0	0	0	0	0	0	0	0	0	0	0	0	0	0	0	0	0	0	0	0	0	0	0	0	0	0	0	0	0	0	0	0	0	0	0	3	Uncharacterized protein	na	na	na
ERR11566171_NODE_22_curated_complete_308	84	0	0	0	0	0	0	0	0	0	0	0	0	0	1	0	1	1	0	0	0	0	0	0	0	0	0	0	0	0	0	0	0	0	0	0	0	0	0	3	na	na	na	na
ERR11566171_NODE_22_curated_complete_98	259	0	0	0	0	0	0	0	0	0	0	0	0	0	1	0	0	0	0	0	1	0	0	0	0	0	0	0	0	0	0	1	0	0	0	0	0	0	0	3	na	na	na	na
ERR14838501_contig_2618_length_403255_complete_133	187	0	1	0	0	0	0	0	1	0	1	0	0	0	0	0	0	0	0	0	0	0	0	0	0	0	0	0	0	0	0	0	0	0	0	0	0	0	0	3	na	na	na	na
ERR14838501_contig_2618_length_403255_complete_189	562	0	1	0	0	0	0	0	0	0	0	0	0	0	0	1	0	0	0	0	0	1	0	0	0	0	0	0	0	0	0	0	0	0	0	0	0	0	0	3	Putative resolvase/recombinase protein	na	na	na
ERR14838501_contig_2618_length_403255_complete_273	113	0	1	0	0	0	0	1	1	0	0	0	0	0	0	0	0	0	0	0	0	0	0	0	0	0	0	0	0	0	0	0	0	0	0	0	0	0	0	3	Uncharacterized protein	na	na	na
ERR14838502_contig_1965_length_377046_start_adj_complete_192	72	0	0	0	0	0	0	0	0	0	0	0	0	0	0	1	0	0	0	0	0	0	0	0	0	1	0	0	0	0	0	0	0	0	1	0	0	0	0	3	na	na	na	na
ERR3450778_NODE_10_curated_final_308	45	0	0	0	0	0	0	0	0	0	0	0	0	0	0	0	1	0	0	0	0	0	0	0	0	0	0	0	0	0	0	0	1	0	0	0	0	1	0	3	na	na	na	na
ERR3450778_NODE_10_curated_final_60	260	0	0	0	0	0	1	0	0	0	0	0	0	0	0	0	0	1	0	0	0	0	0	0	0	0	0	0	0	0	0	0	0	0	0	0	0	1	0	3	na	na	na	na
ERR3450778_NODE_10_curated_final_66	137	0	0	0	0	0	0	0	0	0	0	0	0	0	0	0	0	0	0	0	0	0	0	0	1	0	1	0	0	0	0	0	0	0	0	0	0	1	0	3	na	na	na	na
ERR4341740_NODE_51_curated_complete_7	44	0	0	0	0	0	0	0	0	0	0	0	0	0	0	0	0	1	0	0	0	0	0	0	0	1	0	0	0	1	0	0	0	0	0	0	0	0	0	3	Uncharacterized protein	na	na	na
ERR9250082_NODE_7_curated_complete_145	60	0	0	0	0	0	0	0	0	0	0	0	0	0	0	0	0	0	0	1	0	0	0	0	0	0	0	0	0	0	0	0	0	0	0	1	1	0	0	3	na	na	na	na
huge_phage_1888_curated_final_109	335	0	0	0	0	0	0	0	0	0	0	0	0	0	0	0	0	0	0	0	0	1	0	0	0	1	0	0	0	0	0	0	1	0	0	0	0	0	0	3	Adenine-specific methyltransferase	na	na	na
huge_phage_1888_curated_final_114	378	0	0	0	0	0	0	0	0	0	0	0	0	0	0	0	0	0	0	0	0	1	0	0	0	0	0	0	0	1	0	0	0	0	0	1	0	0	0	3	na	na	na	na
huge_phage_2159_curated_complete_377	224	0	0	1	0	0	0	2	0	0	1	0	0	0	0	0	0	0	0	0	0	0	0	0	0	0	0	0	0	0	0	0	0	0	0	0	0	0	0	3	na	na	na	na
huge_phage_2979_curated_complete_58	42	0	0	0	0	0	0	0	0	0	0	0	0	0	0	0	0	0	0	0	0	0	1	0	0	0	0	0	0	0	0	1	0	1	0	0	0	0	0	3	Gp014	na	na	na
huge_phage_2979_curated_complete_95	103	0	0	0	0	0	0	0	0	0	0	0	0	0	0	0	1	0	0	0	0	0	1	0	0	0	1	0	0	0	0	0	0	0	0	0	0	0	0	3	na	na	na	na
huge_phage_3334_curated_complete_173	228	0	0	0	0	1	0	0	0	1	0	1	0	0	0	0	0	0	0	0	0	0	0	0	0	0	0	0	0	0	0	0	0	0	0	0	0	0	0	3	na	Scaffolding protein functional sites using deep learning	TIGR04376 family protein	na
huge_phage_3334_curated_complete_331	112	0	0	0	0	1	0	0	1	1	0	0	0	0	0	0	0	0	0	0	0	0	0	0	0	0	0	0	0	0	0	0	0	0	0	0	0	0	0	3	na	na	na	na
huge_phage_3584_curated_final_353	195	0	0	0	0	0	0	0	0	0	0	0	0	0	0	0	0	0	0	0	0	0	0	1	0	0	0	0	1	1	0	0	0	0	0	0	0	0	0	3	na	na	na	na
huge_phage_3584_curated_final_354	337	0	0	0	0	0	0	0	0	0	0	0	0	0	0	0	0	0	0	0	0	0	0	1	0	0	0	0	1	1	0	0	0	0	0	0	0	0	0	3	na	na	na	na
huge_phage_4378_curated_complete_148	491	0	0	0	0	0	1	0	0	0	1	0	0	0	0	0	0	0	0	0	0	0	0	0	0	1	0	0	0	0	0	0	0	0	0	0	0	0	0	3	Transposase	Cryo-EM structure of the AsCas12f-sgRNA-target DNA ternary complex	RNA-guided DNA endonuclease domain-containing protein	na
huge_phage_4378_curated_complete_240	240	0	0	0	0	0	0	0	0	0	0	0	0	0	0	0	0	0	0	0	0	0	0	0	0	1	0	0	1	1	0	0	0	0	0	0	0	0	0	3	na	na	na	na
huge_phage_4378_curated_complete_364	181	0	0	0	0	0	0	0	0	0	0	0	0	0	0	0	0	0	0	0	0	0	0	0	0	1	0	0	0	0	0	1	0	0	0	0	1	0	0	3	na	na	na	na
huge_phage_4378_curated_complete_50	347	0	0	0	0	0	0	0	0	0	0	0	0	0	0	0	0	0	0	0	0	0	0	0	0	1	0	0	1	1	0	0	0	0	0	0	0	0	0	3	na	na	na	na
huge_phage_4614_curated_complete_232	170	0	0	0	0	0	1	1	1	0	0	0	0	0	0	0	0	0	0	0	0	0	0	0	0	0	0	0	0	0	0	0	0	0	0	0	0	0	0	3	na	na	na	na
huge_phage_4614_curated_complete_274	290	0	1	0	0	0	1	1	0	0	0	0	0	0	0	0	0	0	0	0	0	0	0	0	0	0	0	0	0	0	0	0	0	0	0	0	0	0	0	3	na	na	na	na
huge_phage_8498_curated_complete_51	140	0	0	0	0	0	0	0	0	0	0	0	0	0	0	0	0	0	0	0	0	0	0	0	0	0	0	0	1	1	0	0	0	1	0	0	0	0	0	3	Uncharacterized protein	DEINOCOCCUS RADIODURANS ISDRA2 TRANSPOSASE RIGHT END DNA COMPLEX	IS200/IS605 family transposase	na
huge_phage_8550_curated_final_111	365	0	0	0	0	0	0	0	0	0	0	0	0	0	0	0	0	0	0	0	0	0	0	0	0	0	0	0	0	1	0	1	0	0	0	0	1	0	0	3	na	Three-dimensional structure of DNA sequence specificity (S) subunit of a type I restriction-modification enzyme and its functional implications	na	na
huge_phage_8550_curated_final_83	231	0	0	0	0	0	0	0	0	0	0	0	0	0	0	0	0	0	0	0	0	0	0	0	0	0	0	0	0	1	0	1	0	0	0	0	1	0	0	3	na	na	na	na
huge_phage_8811_curated_complete_320	174	0	0	0	0	0	0	0	1	0	1	1	0	0	0	0	0	0	0	0	0	0	0	0	0	0	0	0	0	0	0	0	0	0	0	0	0	0	0	3	na	na	na	na
huge_phage_8811_curated_complete_49	102	0	1	0	0	0	0	0	0	0	1	1	0	0	0	0	0	0	0	0	0	0	0	0	0	0	0	0	0	0	0	0	0	0	0	0	0	0	0	3	na	na	na	na
SRR12101443_NODE_2_curated_complete_50	69	0	0	0	0	0	0	0	0	0	0	0	0	0	0	0	0	0	0	1	0	0	1	0	0	0	0	0	0	0	0	1	0	0	0	0	0	0	0	3	Uncharacterized protein	na	na	na
ERR11029134_NODE_10_curated_complete_326	89	0	0	0	0	0	0	0	0	0	0	0	1	0	0	0	0	0	0	0	0	0	0	0	0	0	0	1	0	0	0	0	0	0	0	0	0	0	0	2	na	na	na	na
ERR11029134_NODE_10_curated_complete_64	191	0	0	0	0	0	0	0	0	0	0	0	1	1	0	0	0	0	0	0	0	0	0	0	0	0	0	0	0	0	0	0	0	0	0	0	0	0	0	2	Repressor protein CI	Crystal structure of transcriptional regulator from Listeria innocua	RstR family transcriptional repressor	na
ERR11473975_NODE_51_curated_circular_171	96	0	0	0	0	0	1	0	0	0	0	0	0	0	0	0	0	0	0	0	0	0	0	0	0	0	0	0	0	0	0	0	0	0	0	0	0	0	1	2	na	na	na	na
ERR11473975_NODE_51_curated_circular_306	164	0	0	0	0	0	0	0	0	0	0	0	0	0	0	0	0	0	0	0	0	0	0	0	0	0	0	0	0	0	0	0	1	0	0	0	0	0	1	2	Minor tail protein	Solution NMR Structure of putative cell surface protein MA_4588 (272-376 domain) from Methanosarcina acetivorans, Northeast Structural Genomics Consortium Target MvR254A	na	na
ERR11475043_NODE_132_curated_complete_199	50	1	0	0	0	0	0	0	0	0	1	0	0	0	0	0	0	0	0	0	0	0	0	0	0	0	0	0	0	0	0	0	0	0	0	0	0	0	0	2	na	Crystal structure of the KAP1 tripartite motif in complex with the ZNF93 KRAB domain	F0F1 ATP synthase subunit C	na
ERR11475043_NODE_132_curated_complete_200	507	1	0	0	0	0	0	0	0	0	1	0	0	0	0	0	0	0	0	0	0	0	0	0	0	0	0	0	0	0	0	0	0	0	0	0	0	0	0	2	Restriction endonuclease	na	na	na
ERR11475043_NODE_132_curated_complete_58	261	1	1	0	0	0	0	0	0	0	0	0	0	0	0	0	0	0	0	0	0	0	0	0	0	0	0	0	0	0	0	0	0	0	0	0	0	0	0	2	na	na	na	na
ERR14838501_contig_2618_length_403255_complete_191	81	0	1	0	0	0	0	0	0	0	0	0	0	0	0	1	0	0	0	0	0	0	0	0	0	0	0	0	0	0	0	0	0	0	0	0	0	0	0	2	Helix-turn-helix conjugative transposon-like domain-containing protein	Crystal structure of the Pribnow Box recognition region of SigC from Mycobacterium tuberculosis	na	na
ERR14838501_contig_2618_length_403255_complete_192	184	0	1	0	0	0	0	0	0	0	0	0	0	0	0	1	0	0	0	0	0	0	0	0	0	0	0	0	0	0	0	0	0	0	0	0	0	0	0	2	RNA polymerase sigma-70 region 4	na	RNA polymerase sigma factor	na
ERR14838501_contig_2618_length_403255_complete_193	123	0	1	0	0	0	0	0	0	0	0	0	0	0	0	1	0	0	0	0	0	0	0	0	0	0	0	0	0	0	0	0	0	0	0	0	0	0	0	2	ORF1	Crystal structure of diphtheria toxin repressor like protein from E. coli	manganese-binding transcriptional regulator MntR	na
ERR14838501_contig_2618_length_403255_complete_194	584	0	1	0	0	0	0	0	0	0	0	0	0	0	0	1	0	0	0	0	0	0	0	0	0	0	0	0	0	0	0	0	0	0	0	0	0	0	0	2	ABC-type multidrug transport system, ATPase and permease component	AMP-PNP bound nanodisc reconstituted MsbA with nanobodies, spin-labeled at position A60C	ABC transporter, permease/ATP-binding protein	na
ERR14838501_contig_2618_length_403255_complete_195	594	0	1	0	0	0	0	0	0	0	0	0	0	0	0	1	0	0	0	0	0	0	0	0	0	0	0	0	0	0	0	0	0	0	0	0	0	0	0	2	ABC-type multidrug transport system, ATPase and permease component	Structure of YbtPQ importer with substrate Ybt-Fe bound	ABC transporter, permease/ATP-binding protein	na
ERR14838501_contig_2618_length_403255_complete_197	512	0	1	0	0	0	0	0	0	0	0	0	0	0	0	1	0	0	0	0	0	0	0	0	0	0	0	0	0	0	0	0	0	0	0	0	0	0	0	2	ATP binding cassette sub family F	Cobalt transporter ATP-binding subunit	microcin C ABC transporter ATP-binding protein YejF	na
ERR14838501_contig_2618_length_403255_complete_198	246	0	1	0	0	0	0	0	0	0	0	0	0	0	0	1	0	0	0	0	0	0	0	0	0	0	0	0	0	0	0	0	0	0	0	0	0	0	0	2	na	the structure of ECF PanT transporter in a complex with a nanobody	cobalt ECF transporter T component CbiQ	na
ERR14838501_contig_2618_length_403255_complete_199	193	0	1	0	0	0	0	0	0	0	0	0	0	0	0	1	0	0	0	0	0	0	0	0	0	0	0	0	0	0	0	0	0	0	0	0	0	0	0	2	VUT family protein	na	MptD family putative ECF transporter S component	na
ERR14838501_contig_2618_length_403255_complete_200	110	0	1	0	0	0	0	0	0	0	0	0	0	0	0	1	0	0	0	0	0	0	0	0	0	0	0	0	0	0	0	0	0	0	0	0	0	0	0	2	Nucleoside triphosphate pyrophosphohydrolase	Crystal Structure of D-63 from Sulfolobus Spindle Virus 1	hypothetical protein	na
ERR14838501_contig_2618_length_403255_complete_201	448	0	1	0	0	0	0	0	0	0	0	0	0	0	0	1	0	0	0	0	0	0	0	0	0	0	0	0	0	0	0	0	0	0	0	0	0	0	0	2	na	na	na	na
ERR14838501_contig_2618_length_403255_complete_202	111	0	1	0	0	0	0	0	0	0	0	0	0	0	0	1	0	0	0	0	0	0	0	0	0	0	0	0	0	0	0	0	0	0	0	0	0	0	0	2	na	na	na	na
ERR14838501_contig_2618_length_403255_complete_205	609	0	1	0	0	0	0	0	0	0	0	0	0	0	0	1	0	0	0	0	0	0	0	0	0	0	0	0	0	0	0	0	0	0	0	0	0	0	0	2	na	na	na	na
ERR14838501_contig_2618_length_403255_complete_207	700	0	1	0	0	0	0	0	0	0	0	0	0	0	0	1	0	0	0	0	0	0	0	0	0	0	0	0	0	0	0	0	0	0	0	0	0	0	0	2	DNA topoisomerase (EC 5.6.2.1)	Structure of E. coli topoisomerase III in complex with an 8-base single stranded oligonucleotide. Frozen in glycerol pH 8.0	DNA topoisomerase 3	na
ERR14838501_contig_2618_length_403255_complete_208	359	0	1	0	0	0	0	0	0	0	0	0	0	0	0	1	0	0	0	0	0	0	0	0	0	0	0	0	0	0	0	0	0	0	0	0	0	0	0	2	na	na	na	na
ERR14838501_contig_2618_length_403255_complete_210	660	0	1	0	0	0	0	0	0	0	0	0	0	0	0	1	0	0	0	0	0	0	0	0	0	0	0	0	0	0	0	0	0	0	0	0	0	0	0	2	na	na	na	na
ERR14838501_contig_2618_length_403255_complete_211	341	0	1	0	0	0	0	0	0	0	0	0	0	0	0	1	0	0	0	0	0	0	0	0	0	0	0	0	0	0	0	0	0	0	0	0	0	0	0	2	DNA (cytosine-5-)-methyltransferase (EC 2.1.1.37)	Ternary structure of the Glu119Gln M.HhaI, C5-Cytosine DNA methyltransferase, with unmodified DNA and AdoHcy	na	na
ERR14838501_contig_2618_length_403255_complete_212	90	0	1	0	0	0	0	0	0	0	0	0	0	0	0	1	0	0	0	0	0	0	0	0	0	0	0	0	0	0	0	0	0	0	0	0	0	0	0	2	Uncharacterized protein	Crystal structure of pRO-2.3	TIGR01841 family phasin	na
ERR14838501_contig_2618_length_403255_complete_213	810	0	1	0	0	0	0	0	0	0	0	0	0	0	0	1	0	0	0	0	0	0	0	0	0	0	0	0	0	0	0	0	0	0	0	0	0	0	0	2	Gp155	Hexameric composite model of the Inner Membrane Complex (IMC) with the Arches from the fully-assembled R388 type IV secretion system determined by cryo-EM.	type IV secretion system protein TraC	na
ERR14838501_contig_2618_length_403255_complete_214	290	0	1	0	0	0	0	0	0	0	0	0	0	0	0	1	0	0	0	0	0	0	0	0	0	0	0	0	0	0	0	0	0	0	0	0	0	0	0	2	Gp153	na	conjugal transfer protein TrbL	na
ERR14838501_contig_2618_length_403255_complete_215	72	0	1	0	0	0	0	0	0	0	0	0	0	0	0	1	0	0	0	0	0	0	0	0	0	0	0	0	0	0	0	0	0	0	0	0	0	0	0	2	Membrane-bound protein	P3(2) CRYSTAL STRUCTURE OF ALA2ILE2-6, A VERSION OF ROP WITH A REPACKED HYDROPHOBIC CORE AND A NEW FOLD.	multidrug/spermidine efflux SMR transporter subunit MdtI	na
ERR14838501_contig_2618_length_403255_complete_225	164	0	1	0	0	0	0	0	0	0	0	0	0	0	0	1	0	0	0	0	0	0	0	0	0	0	0	0	0	0	0	0	0	0	0	0	0	0	0	2	Uncharacterized protein	na	na	na
ERR14838501_contig_2618_length_403255_complete_264	135	0	1	0	0	0	0	0	1	0	0	0	0	0	0	0	0	0	0	0	0	0	0	0	0	0	0	0	0	0	0	0	0	0	0	0	0	0	0	2	na	na	na	na
ERR14838501_contig_2618_length_403255_complete_402	205	0	1	0	0	0	0	1	0	0	0	0	0	0	0	0	0	0	0	0	0	0	0	0	0	0	0	0	0	0	0	0	0	0	0	0	0	0	0	2	na	na	na	na
ERR14838502_contig_1965_length_377046_start_adj_complete_114	586	0	1	0	0	0	0	0	0	0	0	0	0	0	0	1	0	0	0	0	0	0	0	0	0	0	0	0	0	0	0	0	0	0	0	0	0	0	0	2	Conjugal transfer protein	Mechanism of regulation of the Helicobacter pylori Cagbeta ATPase by CagZ	type IV secretion system component VirD4	na
ERR14838502_contig_1965_length_377046_start_adj_complete_12	366	1	0	0	0	0	0	0	0	0	0	0	0	0	0	1	0	0	0	0	0	0	0	0	0	0	0	0	0	0	0	0	0	0	0	0	0	0	0	2	Putative type I restriction modification DNA specificity domain protein	Three-dimensional structure of DNA sequence specificity (S) subunit of a type I restriction-modification enzyme and its functional implications	na	na
ERR14838502_contig_1965_length_377046_start_adj_complete_122	92	0	1	0	0	0	0	0	0	0	0	0	0	0	0	1	0	0	0	0	0	0	0	0	0	0	0	0	0	0	0	0	0	0	0	0	0	0	0	2	na	na	na	na
ERR14838502_contig_1965_length_377046_start_adj_complete_133	290	0	1	0	0	0	0	0	0	0	0	0	0	0	0	1	0	0	0	0	0	0	0	0	0	0	0	0	0	0	0	0	0	0	0	0	0	0	0	2	AraC family transcriptional regulator	Apo form of the Y31V mutant dimerization domain fragment of Escherichia coli regulatory protein AraC	na	na
ERR14838502_contig_1965_length_377046_start_adj_complete_375	250	0	0	0	0	0	0	0	0	0	0	0	0	0	0	1	0	0	1	0	0	0	0	0	0	0	0	0	0	0	0	0	0	0	0	0	0	0	0	2	Integrase	Structure of the HTLV-2 integrase catalytic core domain in complex with magnesium (trimeric form)	IS3 family transposase	na
ERR3450778_NODE_10_curated_final_61	292	1	0	0	0	0	0	0	0	0	0	0	0	0	0	0	0	0	0	0	0	0	0	0	0	0	0	0	0	0	0	0	0	0	0	0	0	1	0	2	na	na	na	na
ERR4334199_NODE_10_curated_complete_296	350	0	0	0	0	0	0	0	0	0	0	0	0	0	0	0	1	0	0	0	0	0	0	0	0	0	0	0	0	0	0	0	0	0	0	0	0	1	0	2	Putative type I restriction modification DNA specificity domain protein	Crystal structure of Type-I restriction-modification system S subunit from M. genitalium	type I restriction-modification system specificity subunit	na
ERR4334199_NODE_10_curated_complete_299	290	0	0	0	0	0	0	0	0	0	0	0	0	0	0	0	1	0	0	0	0	0	0	0	0	0	0	0	0	0	0	0	0	0	1	0	0	0	0	2	na	na	na	na
ERR4341740_NODE_51_curated_complete_203	403	0	0	0	0	0	0	0	0	0	0	0	0	0	0	0	0	1	0	0	1	0	0	0	0	0	0	0	0	0	0	0	0	0	0	0	0	0	0	2	3'-phosphate/5'-hydroxy nucleic acid ligase (EC 6.5.1.8)	RNA ligase RtcB from Pyrococcus horikoshii in complex with Ni2+ and GTP	RNA ligase RtcB family protein, release factor H-associated	na
ERR4341740_NODE_51_curated_complete_326	688	0	0	0	0	0	0	0	0	0	0	0	0	0	0	0	0	1	0	1	0	0	0	0	0	0	0	0	0	0	0	0	0	0	0	0	0	0	0	2	site-specific DNA-methyltransferase (adenine-specific) (EC 2.1.1.72)	Crystal structure of Type I restriction enzyme StySJI M protein (NP_813429.1) from Bacteroides thetaiotaomicron VPI-5482 at 2.20 A resolution	type I restriction-modification system subunit M	na
ERR9250082_NODE_7_curated_complete_234	583	0	0	0	0	0	0	0	0	0	0	0	0	0	0	0	0	1	0	1	0	0	0	0	0	0	0	0	0	0	0	0	0	0	0	0	0	0	0	2	na	na	na	na
ERR9250082_NODE_7_curated_complete_235	78	0	0	0	0	0	0	0	0	0	0	0	0	0	0	0	0	0	0	1	0	0	0	0	0	0	0	0	0	0	0	0	0	0	1	0	0	0	0	2	na	na	na	na
huge_phage_1554_curated_complete_197	136	0	0	0	0	0	1	0	0	0	0	0	0	0	0	0	0	0	0	0	1	0	0	0	0	0	0	0	0	0	0	0	0	0	0	0	0	0	0	2	Uncharacterized protein	na	na	na
huge_phage_1554_curated_complete_21	188	0	0	0	0	0	0	0	0	0	0	0	0	0	0	0	0	0	0	0	1	0	0	0	0	0	0	0	0	0	0	0	0	0	1	0	0	0	0	2	na	na	na	na
huge_phage_1554_curated_complete_230	209	0	0	0	0	0	0	0	0	0	0	0	0	0	0	0	0	0	0	0	1	0	0	0	0	0	0	0	0	0	0	0	1	0	0	0	0	0	0	2	na	na	na	na
huge_phage_1554_curated_complete_385	233	0	0	0	0	0	0	0	0	0	0	0	0	1	0	0	0	0	0	0	1	0	0	0	0	0	0	0	0	0	0	0	0	0	0	0	0	0	0	2	na	na	na	na
huge_phage_1888_curated_final_110	227	0	0	0	0	0	0	0	0	0	0	0	0	0	0	0	0	0	0	0	0	1	0	0	0	1	0	0	0	0	0	0	0	0	0	0	0	0	0	2	Nucleoside 2-deoxyribosyltransferase	Crystal structure of the TIR domain H685A mutant from human SARM1	response regulator transcription factor ErdR	na
huge_phage_1888_curated_final_278	157	0	0	0	0	0	0	0	0	0	0	0	0	0	0	0	0	0	0	0	0	1	0	0	0	0	0	1	0	0	0	0	0	0	0	0	0	0	0	2	na	na	na	na
huge_phage_1888_curated_final_279	56	0	0	0	0	0	0	0	0	0	0	0	0	0	0	0	0	0	0	0	0	1	0	0	0	0	0	1	0	0	0	0	0	0	0	0	0	0	0	2	Uncharacterized protein	na	na	na
huge_phage_2159_curated_complete_138	75	0	0	1	1	0	0	0	0	0	0	0	0	0	0	0	0	0	0	0	0	0	0	0	0	0	0	0	0	0	0	0	0	0	0	0	0	0	0	2	na	na	na	na
huge_phage_2159_curated_complete_140	212	0	0	1	1	0	0	0	0	0	0	0	0	0	0	0	0	0	0	0	0	0	0	0	0	0	0	0	0	0	0	0	0	0	0	0	0	0	0	2	na	na	na	na
huge_phage_2159_curated_complete_154	82	0	0	1	0	0	0	1	0	0	0	0	0	0	0	0	0	0	0	0	0	0	0	0	0	0	0	0	0	0	0	0	0	0	0	0	0	0	0	2	Uncharacterized protein	Structure of the SRII/HtrII Complex in I212121 space group (""U"" shape)	flagellar hook-basal body complex protein FliE	na
huge_phage_2782_curated_complete_198	171	0	0	0	1	0	0	0	0	0	1	0	0	0	0	0	0	0	0	0	0	0	0	0	0	0	0	0	0	0	0	0	0	0	0	0	0	0	0	2	Acetyltransferase	Crystal structure of AtaT2-AtaR2 complex	aminoglycoside 6'-N-acetyltransferase AacA34	na
huge_phage_2782_curated_complete_239	138	0	0	0	1	0	0	0	0	1	0	0	0	0	0	0	0	0	0	0	0	0	0	0	0	0	0	0	0	0	0	0	0	0	0	0	0	0	0	2	na	na	na	na
huge_phage_2782_curated_complete_371	163	0	0	0	1	0	0	0	0	0	0	1	0	0	0	0	0	0	0	0	0	0	0	0	0	0	0	0	0	0	0	0	0	0	0	0	0	0	0	2	Acetyltransferase	CRYSTAL STRUCTURE OF A putative acetyltransferase of the GNAT family (DDE_3044) FROM DESULFOVIBRIO DESULFURICANS SUBSP. AT 1.85 A RESOLUTION	streptothricin N-acetyltransferase Sat4	na
huge_phage_2782_curated_complete_372	280	0	0	0	1	0	0	0	0	0	0	1	0	0	0	0	0	0	0	0	0	0	0	0	0	0	0	0	0	0	0	0	0	0	0	0	0	0	0	2	na	na	na	na
huge_phage_2782_curated_complete_5	65	0	0	0	1	0	0	0	1	0	0	0	0	0	0	0	0	0	0	0	0	0	0	0	0	0	0	0	0	0	0	0	0	0	0	0	0	0	0	2	na	na	na	na
huge_phage_2979_curated_complete_301	39	0	0	0	0	0	0	0	0	0	0	0	0	0	0	0	0	0	0	0	0	0	1	0	0	0	0	0	0	0	1	0	0	0	0	0	0	0	0	2	Coil containing protein	na	na	na
huge_phage_2979_curated_complete_302	348	0	0	0	0	0	0	0	0	0	0	0	0	0	0	0	0	0	0	0	0	0	1	0	0	0	0	0	0	0	1	0	0	0	0	0	0	0	0	2	na	na	na	na
huge_phage_2979_curated_complete_303	67	0	0	0	0	0	0	0	0	0	0	0	0	0	0	0	0	0	0	0	0	0	1	0	0	0	0	0	0	0	1	0	0	0	0	0	0	0	0	2	na	na	na	na
huge_phage_2979_curated_complete_304	154	0	0	0	0	0	0	0	0	0	0	0	0	0	0	0	0	0	0	0	0	0	1	0	0	0	0	0	0	0	1	0	0	0	0	0	0	0	0	2	Uncharacterized protein	na	na	na
huge_phage_2979_curated_complete_306	71	0	0	0	0	0	0	0	0	0	0	0	0	0	0	0	0	0	0	0	0	0	1	0	0	0	0	0	0	0	1	0	0	0	0	0	0	0	0	2	na	na	na	na
huge_phage_3334_curated_complete_120	290	0	0	0	0	1	0	0	0	1	0	0	0	0	0	0	0	0	0	0	0	0	0	0	0	0	0	0	0	0	0	0	0	0	0	0	0	0	0	2	DUF3990 domain-containing protein	na	na	na
huge_phage_3334_curated_complete_121	141	0	0	0	0	1	0	0	0	1	0	0	0	0	0	0	0	0	0	0	0	0	0	0	0	0	0	0	0	0	0	0	0	0	0	0	0	0	0	2	na	na	na	na
huge_phage_3334_curated_complete_185	209	0	0	0	0	1	0	0	0	0	1	0	0	0	0	0	0	0	0	0	0	0	0	0	0	0	0	0	0	0	0	0	0	0	0	0	0	0	0	2	na	na	na	na
huge_phage_3584_curated_final_321	205	0	0	0	0	0	0	0	0	0	0	0	0	0	0	0	0	0	0	0	0	0	0	1	0	0	0	0	0	1	0	0	0	0	0	0	0	0	0	2	Uncharacterized protein	na	na	na
huge_phage_3584_curated_final_322	310	0	0	0	0	0	0	0	0	0	0	0	0	0	0	0	0	0	0	0	0	0	0	1	0	0	0	0	0	1	0	0	0	0	0	0	0	0	0	2	na	na	na	na
huge_phage_3584_curated_final_323	130	0	0	0	0	0	0	0	0	0	0	0	0	0	0	0	0	0	0	0	0	0	0	1	0	0	0	0	0	1	0	0	0	0	0	0	0	0	0	2	SMI1/KNR4 family protein	na	na	na
huge_phage_3584_curated_final_327	342	0	0	0	0	0	0	0	0	0	0	0	0	0	0	0	0	0	0	0	0	0	0	1	0	0	0	0	0	1	0	0	0	0	0	0	0	0	0	2	na	na	na	na
huge_phage_3584_curated_final_329	351	0	0	0	0	0	0	0	0	0	0	0	0	0	0	0	0	0	0	0	0	0	0	1	0	0	0	0	1	0	0	0	0	0	0	0	0	0	0	2	Putative type I restriction modification DNA specificity domain protein	Crystal structure of Type-I restriction-modification system S subunit from M. genitalium	na	na
huge_phage_3584_curated_final_330	363	0	0	0	0	0	0	0	0	0	0	0	0	0	0	0	0	0	0	0	0	0	0	1	0	0	0	0	1	0	0	0	0	0	0	0	0	0	0	2	na	na	na	na
huge_phage_3584_curated_final_331	76	0	0	0	0	0	0	0	0	0	0	0	0	0	0	0	0	0	0	0	0	0	0	1	0	0	0	0	1	0	0	0	0	0	0	0	0	0	0	2	na	na	na	na
huge_phage_4378_curated_complete_35	107	0	0	0	0	0	0	0	0	0	0	0	0	0	0	0	0	0	0	0	0	0	0	0	0	1	0	0	0	1	0	0	0	0	0	0	0	0	0	2	Uncharacterized protein	na	na	na
huge_phage_4614_curated_complete_290	177	0	0	0	0	0	1	0	0	0	0	1	0	0	0	0	0	0	0	0	0	0	0	0	0	0	0	0	0	0	0	0	0	0	0	0	0	0	0	2	Uncharacterized protein	na	na	na
huge_phage_5020_curated_complete_390	77	0	1	0	0	0	0	1	0	0	0	0	0	0	0	0	0	0	0	0	0	0	0	0	0	0	0	0	0	0	0	0	0	0	0	0	0	0	0	2	na	na	na	na
huge_phage_5175_331	79	0	0	0	0	0	0	0	1	1	0	0	0	0	0	0	0	0	0	0	0	0	0	0	0	0	0	0	0	0	0	0	0	0	0	0	0	0	0	2	na	na	na	na
huge_phage_5175_39	181	0	0	0	0	0	0	0	1	0	0	0	0	0	0	0	0	0	0	0	0	0	0	0	0	0	0	1	0	0	0	0	0	0	0	0	0	0	0	2	Toll-like receptor	Structure of the TIR domain of the immunosuppressor BtpA from Brucella	methylaspartate mutase subunit S	na
huge_phage_8498_curated_complete_168	112	0	0	0	0	0	0	0	0	0	0	0	0	0	0	0	0	0	0	0	0	0	0	0	0	0	0	0	1	1	0	0	0	0	0	0	0	0	0	2	Uncharacterized protein	Transcriptional regulator LmrR with Trp-67 and Trp-96 replaced by the unnatural amino acid 5-fluoroTrp	na	na
huge_phage_8498_curated_complete_169	97	0	0	0	0	0	0	0	0	0	0	0	0	0	0	0	0	0	0	0	0	0	0	0	0	0	0	0	1	1	0	0	0	0	0	0	0	0	0	2	na	na	na	na
huge_phage_8550_curated_final_110	434	0	0	0	0	0	0	0	0	0	0	0	1	0	0	0	0	0	0	0	0	0	0	0	0	0	0	0	0	1	0	0	0	0	0	0	0	0	0	2	na	na	na	na
huge_phage_8550_curated_final_231	76	0	0	0	0	0	0	0	0	0	0	0	0	0	0	0	0	0	0	0	0	0	0	0	0	0	0	0	1	1	0	0	0	0	0	0	0	0	0	2	Uncharacterized protein	na	bacteriocin-like WGxF protein	na
NZ_DXPE01000001_curated_complete_150	93	0	0	0	0	0	0	0	0	0	0	0	0	0	0	0	0	0	0	0	0	0	0	0	0	0	0	0	0	0	1	1	0	0	0	0	0	0	0	2	na	na	na	na
NZ_DXPE01000001_curated_complete_243	354	0	0	0	0	0	0	0	0	0	1	0	0	0	0	0	0	0	0	0	0	0	0	0	0	0	0	0	0	0	1	0	0	0	0	0	0	0	0	2	Putative type I restriction modification DNA specificity domain protein	Three-dimensional structure of DNA sequence specificity (S) subunit of a type I restriction-modification enzyme and its functional implications	type I restriction-modification system specificity subunit	na
SRR12101443_NODE_2_curated_complete_248	259	0	0	0	0	0	0	0	0	0	0	0	0	0	0	0	0	0	0	0	0	0	0	0	0	0	0	0	0	0	0	1	0	0	0	0	1	0	0	2	na	na	na	na
SRR12101443_NODE_2_curated_complete_249	106	0	0	0	0	0	0	0	0	0	0	0	0	0	0	0	0	0	0	0	0	0	0	0	0	0	0	0	0	0	0	1	0	0	0	0	1	0	0	2	na	na	na	na
SRR12101443_NODE_2_curated_complete_250	292	0	0	0	0	0	0	0	0	0	0	0	0	0	0	0	0	0	0	0	0	0	0	0	0	0	0	0	0	0	0	1	0	0	0	0	1	0	0	2	na	na	na	na
SRR13207761_NODE_54_curated_final_273	60	0	0	0	0	0	0	0	0	0	0	0	0	0	0	0	0	0	0	0	0	0	0	0	0	0	0	0	0	0	0	0	1	0	0	1	0	0	0	2	na	na	na	na
ERR11029134_NODE_10_curated_complete_25	40	0	0	0	0	0	0	0	0	0	0	0	1	0	0	0	0	0	0	0	0	0	0	0	0	0	0	0	0	0	0	0	0	0	0	0	0	0	0	1	Uncharacterized protein	na	na	na
ERR11029134_NODE_10_curated_complete_26	223	0	0	0	0	0	0	0	0	0	0	0	1	0	0	0	0	0	0	0	0	0	0	0	0	0	0	0	0	0	0	0	0	0	0	0	0	0	0	1	Uncharacterized protein	Crystal structure of the P95883_SULSO protein from Sulfolobus solfataricus. NESG target SsR10.	na	na
ERR11029134_NODE_10_curated_complete_272	245	0	0	0	0	0	0	0	0	0	0	0	1	0	0	0	0	0	0	0	0	0	0	0	0	0	0	0	0	0	0	0	0	0	0	0	0	0	0	1	na	na	na	na
ERR11029134_NODE_10_curated_complete_29	233	0	0	0	0	0	0	0	0	0	0	0	1	0	0	0	0	0	0	0	0	0	0	0	0	0	0	0	0	0	0	0	0	0	0	0	0	0	0	1	na	na	na	na
ERR11029134_NODE_10_curated_complete_331	70	0	0	0	0	0	0	0	0	0	0	0	1	0	0	0	0	0	0	0	0	0	0	0	0	0	0	0	0	0	0	0	0	0	0	0	0	0	0	1	na	na	na	na
ERR11473358_NODE_44_curated_complete_1	114	0	0	0	0	0	0	0	0	0	0	0	0	1	0	0	0	0	0	0	0	0	0	0	0	0	0	0	0	0	0	0	0	0	0	0	0	0	0	1	na	na	na	na
ERR11473975_NODE_51_curated_circular_180	40	0	0	0	0	0	0	0	0	0	0	0	0	0	0	0	0	0	0	0	0	0	0	0	0	0	0	0	0	0	0	0	0	0	0	0	0	0	1	1	na	na	na	na
ERR11473975_NODE_51_curated_circular_183	137	0	0	0	0	0	0	0	0	0	0	0	0	0	0	0	0	0	0	0	0	0	0	0	0	0	0	0	0	0	0	0	0	0	0	0	0	0	1	1	na	na	na	na
ERR11473975_NODE_51_curated_circular_200	64	0	0	0	0	0	0	0	0	0	0	0	0	0	0	0	0	0	0	0	0	0	0	0	0	0	0	0	0	0	0	0	0	0	0	0	0	0	1	1	Uncharacterized protein	na	na	na
ERR11473975_NODE_51_curated_circular_305	144	0	0	0	0	0	0	0	0	0	0	0	0	0	0	0	0	0	0	0	0	0	0	0	0	0	0	0	0	0	0	0	0	0	0	0	0	0	1	1	Modification methylase	na	na	na
ERR11473975_NODE_51_curated_circular_308	187	0	0	0	0	0	0	0	0	0	0	0	0	0	0	0	0	0	0	0	0	0	0	0	0	0	0	0	0	0	0	0	0	0	0	0	0	0	1	1	na	na	na	na
ERR11473975_NODE_51_curated_circular_337	361	0	0	0	0	0	0	0	0	0	0	0	0	0	0	0	0	0	0	0	0	0	0	0	0	0	0	0	0	0	0	0	0	0	0	0	0	0	1	1	na	na	na	na
ERR11473975_NODE_51_curated_circular_338	193	0	0	0	0	0	0	0	0	0	0	0	0	0	0	0	0	0	0	0	0	0	0	0	0	0	0	0	0	0	0	0	0	0	0	0	0	0	1	1	na	na	na	na
ERR11475043_NODE_132_curated_complete_100	193	1	0	0	0	0	0	0	0	0	0	0	0	0	0	0	0	0	0	0	0	0	0	0	0	0	0	0	0	0	0	0	0	0	0	0	0	0	0	1	Uncharacterized protein	Crystal structure of the P95883_SULSO protein from Sulfolobus solfataricus. NESG target SsR10.	na	na
ERR11475043_NODE_132_curated_complete_151	162	1	0	0	0	0	0	0	0	0	0	0	0	0	0	0	0	0	0	0	0	0	0	0	0	0	0	0	0	0	0	0	0	0	0	0	0	0	0	1	na	na	na	na
ERR11475043_NODE_132_curated_complete_156	39	1	0	0	0	0	0	0	0	0	0	0	0	0	0	0	0	0	0	0	0	0	0	0	0	0	0	0	0	0	0	0	0	0	0	0	0	0	0	1	na	na	na	na
ERR11475043_NODE_132_curated_complete_20	73	1	0	0	0	0	0	0	0	0	0	0	0	0	0	0	0	0	0	0	0	0	0	0	0	0	0	0	0	0	0	0	0	0	0	0	0	0	0	1	na	na	na	na
ERR11475043_NODE_132_curated_complete_281	79	1	0	0	0	0	0	0	0	0	0	0	0	0	0	0	0	0	0	0	0	0	0	0	0	0	0	0	0	0	0	0	0	0	0	0	0	0	0	1	Transposase	Structure of Transcription factor, GerE	BldC family transcriptional regulator	na
ERR11475043_NODE_132_curated_complete_282	109	1	0	0	0	0	0	0	0	0	0	0	0	0	0	0	0	0	0	0	0	0	0	0	0	0	0	0	0	0	0	0	0	0	0	0	0	0	0	1	Uncharacterized protein	Crystal structure of a small conductance potassium channel splice variant complexed with calcium-calmodulin	Na+/H+ antiporter subunit G	na
ERR11475043_NODE_132_curated_complete_283	87	1	0	0	0	0	0	0	0	0	0	0	0	0	0	0	0	0	0	0	0	0	0	0	0	0	0	0	0	0	0	0	0	0	0	0	0	0	0	1	Uncharacterized protein	na	na	na
ERR11475043_NODE_132_curated_complete_284	95	1	0	0	0	0	0	0	0	0	0	0	0	0	0	0	0	0	0	0	0	0	0	0	0	0	0	0	0	0	0	0	0	0	0	0	0	0	0	1	na	na	na	na
ERR11475043_NODE_132_curated_complete_285	231	1	0	0	0	0	0	0	0	0	0	0	0	0	0	0	0	0	0	0	0	0	0	0	0	0	0	0	0	0	0	0	0	0	0	0	0	0	0	1	DNA methylase	DNA N6-Adenine Methyltransferase CcrM In Complex with Double-Stranded DNA Oligonucleotide Containing Its Recognition Sequence GAATC	DNA methyltransferase	na
ERR11475043_NODE_132_curated_complete_286	181	1	0	0	0	0	0	0	0	0	0	0	0	0	0	0	0	0	0	0	0	0	0	0	0	0	0	0	0	0	0	0	0	0	0	0	0	0	0	1	na	na	na	na
ERR11475043_NODE_132_curated_complete_287	393	1	0	0	0	0	0	0	0	0	0	0	0	0	0	0	0	0	0	0	0	0	0	0	0	0	0	0	0	0	0	0	0	0	0	0	0	0	0	1	Sulfatase-modifying factor enzyme-like domain-containing protein	Thermus aquaticus variable protein (TaqVP) from diversity-generating retroelements (DGR)	na	na
ERR11475043_NODE_132_curated_complete_288	45	1	0	0	0	0	0	0	0	0	0	0	0	0	0	0	0	0	0	0	0	0	0	0	0	0	0	0	0	0	0	0	0	0	0	0	0	0	0	1	na	na	na	na
ERR11475043_NODE_132_curated_complete_289	222	1	0	0	0	0	0	0	0	0	0	0	0	0	0	0	0	0	0	0	0	0	0	0	0	0	0	0	0	0	0	0	0	0	0	0	0	0	0	1	Uncharacterized protein	na	na	na
ERR11475043_NODE_132_curated_complete_290	201	1	0	0	0	0	0	0	0	0	0	0	0	0	0	0	0	0	0	0	0	0	0	0	0	0	0	0	0	0	0	0	0	0	0	0	0	0	0	1	Uncharacterized protein	High resolution crystal structure of ASCH domain from Lactobacillus crispatus JV V101	na	na
ERR11475043_NODE_132_curated_complete_291	317	1	0	0	0	0	0	0	0	0	0	0	0	0	0	0	0	0	0	0	0	0	0	0	0	0	0	0	0	0	0	0	0	0	0	0	0	0	0	1	Replication associated protein	na	na	na
ERR11475043_NODE_132_curated_complete_292	92	1	0	0	0	0	0	0	0	0	0	0	0	0	0	0	0	0	0	0	0	0	0	0	0	0	0	0	0	0	0	0	0	0	0	0	0	0	0	1	Uncharacterized protein	na	na	na
ERR11475043_NODE_132_curated_complete_293	189	1	0	0	0	0	0	0	0	0	0	0	0	0	0	0	0	0	0	0	0	0	0	0	0	0	0	0	0	0	0	0	0	0	0	0	0	0	0	1	Putative helicase	na	na	na
ERR11475043_NODE_132_curated_complete_294	183	1	0	0	0	0	0	0	0	0	0	0	0	0	0	0	0	0	0	0	0	0	0	0	0	0	0	0	0	0	0	0	0	0	0	0	0	0	0	1	DUF1064 domain-containing protein	na	na	na
ERR11475043_NODE_132_curated_complete_295	72	1	0	0	0	0	0	0	0	0	0	0	0	0	0	0	0	0	0	0	0	0	0	0	0	0	0	0	0	0	0	0	0	0	0	0	0	0	0	1	Uncharacterized protein	Crystal Structure of Borrelia burgdorferi Pur-alpha	HAF repeat	na
ERR11475043_NODE_132_curated_complete_296	210	1	0	0	0	0	0	0	0	0	0	0	0	0	0	0	0	0	0	0	0	0	0	0	0	0	0	0	0	0	0	0	0	0	0	0	0	0	0	1	Uncharacterized protein	na	na	na
ERR11475043_NODE_132_curated_complete_297	161	1	0	0	0	0	0	0	0	0	0	0	0	0	0	0	0	0	0	0	0	0	0	0	0	0	0	0	0	0	0	0	0	0	0	0	0	0	0	1	Uncharacterized protein	Crystal structure of Mycobacterium tuberculosis anti-sigma factor RslA in complex with -35 promoter binding domain of sigL	RNA polymerase sigma-70 factor, Planctomycetaceae-specific subfamily 1	na
ERR11475043_NODE_132_curated_complete_298	106	1	0	0	0	0	0	0	0	0	0	0	0	0	0	0	0	0	0	0	0	0	0	0	0	0	0	0	0	0	0	0	0	0	0	0	0	0	0	1	Uncharacterized protein	na	na	na
ERR11475043_NODE_132_curated_complete_299	66	1	0	0	0	0	0	0	0	0	0	0	0	0	0	0	0	0	0	0	0	0	0	0	0	0	0	0	0	0	0	0	0	0	0	0	0	0	0	1	Uncharacterized protein	na	MXAN_5187 C-terminal domain	na
ERR11475043_NODE_132_curated_complete_300	86	1	0	0	0	0	0	0	0	0	0	0	0	0	0	0	0	0	0	0	0	0	0	0	0	0	0	0	0	0	0	0	0	0	0	0	0	0	0	1	Uncharacterized protein	na	na	na
ERR11475043_NODE_132_curated_complete_301	87	1	0	0	0	0	0	0	0	0	0	0	0	0	0	0	0	0	0	0	0	0	0	0	0	0	0	0	0	0	0	0	0	0	0	0	0	0	0	1	Uncharacterized protein	Abl1 SH3 pTyr89/134	na	na
ERR11475043_NODE_132_curated_complete_302	114	1	0	0	0	0	0	0	0	0	0	0	0	0	0	0	0	0	0	0	0	0	0	0	0	0	0	0	0	0	0	0	0	0	0	0	0	0	0	1	na	na	na	na
ERR11475043_NODE_132_curated_complete_303	73	1	0	0	0	0	0	0	0	0	0	0	0	0	0	0	0	0	0	0	0	0	0	0	0	0	0	0	0	0	0	0	0	0	0	0	0	0	0	1	Uncharacterized protein	na	na	na
ERR11475043_NODE_132_curated_complete_304	112	1	0	0	0	0	0	0	0	0	0	0	0	0	0	0	0	0	0	0	0	0	0	0	0	0	0	0	0	0	0	0	0	0	0	0	0	0	0	1	Coil containing protein	na	na	na
ERR11475043_NODE_132_curated_complete_305	299	1	0	0	0	0	0	0	0	0	0	0	0	0	0	0	0	0	0	0	0	0	0	0	0	0	0	0	0	0	0	0	0	0	0	0	0	0	0	1	DUF3560 domain-containing protein	na	na	na
ERR11475043_NODE_132_curated_complete_306	148	1	0	0	0	0	0	0	0	0	0	0	0	0	0	0	0	0	0	0	0	0	0	0	0	0	0	0	0	0	0	0	0	0	0	0	0	0	0	1	Uncharacterized protein	na	na	na
ERR11475043_NODE_132_curated_complete_307	66	1	0	0	0	0	0	0	0	0	0	0	0	0	0	0	0	0	0	0	0	0	0	0	0	0	0	0	0	0	0	0	0	0	0	0	0	0	0	1	Uncharacterized protein	CRYSTAL STRUCTURE OF FOUR-HELIX BUNDLE MODEL di-Co(II)-DF1-L13A (form II)	Lmo0654 family protein	na
ERR11475043_NODE_132_curated_complete_308	164	1	0	0	0	0	0	0	0	0	0	0	0	0	0	0	0	0	0	0	0	0	0	0	0	0	0	0	0	0	0	0	0	0	0	0	0	0	0	1	N-terminal domain-containing protein	na	na	na
ERR11475043_NODE_132_curated_complete_309	46	1	0	0	0	0	0	0	0	0	0	0	0	0	0	0	0	0	0	0	0	0	0	0	0	0	0	0	0	0	0	0	0	0	0	0	0	0	0	1	Uncharacterized protein	na	Bdr protein N-terminal domain	na
ERR11475043_NODE_132_curated_complete_310	73	1	0	0	0	0	0	0	0	0	0	0	0	0	0	0	0	0	0	0	0	0	0	0	0	0	0	0	0	0	0	0	0	0	0	0	0	0	0	1	DUF1778 domain-containing protein	SUBSTITUTING HYDROPHOBIC RESIDUES FOR A BURIED SALT BRIDGE ENHANCES PROTEIN STABILITY BUT DOES NOT REDUCE CONFORMATIONAL SPECIFICITY	LexA regulated protein	na
ERR11475043_NODE_132_curated_complete_311	112	1	0	0	0	0	0	0	0	0	0	0	0	0	0	0	0	0	0	0	0	0	0	0	0	0	0	0	0	0	0	0	0	0	0	0	0	0	0	1	na	na	na	na
ERR11475043_NODE_132_curated_complete_312	83	1	0	0	0	0	0	0	0	0	0	0	0	0	0	0	0	0	0	0	0	0	0	0	0	0	0	0	0	0	0	0	0	0	0	0	0	0	0	1	Helix-turn-helix XRE-family like protein	High-resolution crystal structure of the restriction-modification controller protein C.AhdI from Aeromonas hydrophila	RstR family transcriptional repressor	na
ERR11475043_NODE_132_curated_complete_313	347	1	0	0	0	0	0	0	0	0	0	0	0	0	0	0	0	0	0	0	0	0	0	0	0	0	0	0	0	0	0	0	0	0	0	0	0	0	0	1	na	na	na	na
ERR11475043_NODE_132_curated_complete_314	261	1	0	0	0	0	0	0	0	0	0	0	0	0	0	0	0	0	0	0	0	0	0	0	0	0	0	0	0	0	0	0	0	0	0	0	0	0	0	1	Small Terminase	Crystal structure of Prefoldin from Pyrococcus horikoshii OT3	na	na
ERR11475043_NODE_132_curated_complete_315	162	1	0	0	0	0	0	0	0	0	0	0	0	0	0	0	0	0	0	0	0	0	0	0	0	0	0	0	0	0	0	0	0	0	0	0	0	0	0	1	Uncharacterized protein	na	na	na
ERR11475043_NODE_132_curated_complete_316	599	1	0	0	0	0	0	0	0	0	0	0	0	0	0	0	0	0	0	0	0	0	0	0	0	0	0	0	0	0	0	0	0	0	0	0	0	0	0	1	Bacteriophage lambda, GpA	na	na	na
ERR11475043_NODE_132_curated_complete_317	79	1	0	0	0	0	0	0	0	0	0	0	0	0	0	0	0	0	0	0	0	0	0	0	0	0	0	0	0	0	0	0	0	0	0	0	0	0	0	1	Uncharacterized protein	hTRiC-hPFD Class3	50S ribosomal protein L29	na
ERR11475043_NODE_132_curated_complete_318	531	1	0	0	0	0	0	0	0	0	0	0	0	0	0	0	0	0	0	0	0	0	0	0	0	0	0	0	0	0	0	0	0	0	0	0	0	0	0	1	Putative capsid protein	Structure of the bacteriophage lambda portal vertex	phage portal protein	na
ERR11475043_NODE_132_curated_complete_319	373	1	0	0	0	0	0	0	0	0	0	0	0	0	0	0	0	0	0	0	0	0	0	0	0	0	0	0	0	0	0	0	0	0	0	0	0	0	0	1	Putative capsid assembly protease C	Structure of signal peptide peptidase A with C-termini bound in the active sites: insights into specificity, self-processing and regulation	ATP-dependent Clp protease proteolytic subunit	na
ERR11475043_NODE_132_curated_complete_320	117	1	0	0	0	0	0	0	0	0	0	0	0	0	0	0	0	0	0	0	0	0	0	0	0	0	0	0	0	0	0	0	0	0	0	0	0	0	0	1	Decorator protein D	YSD1 bacteriophage capsid	na	na
ERR11475043_NODE_132_curated_complete_321	351	1	0	0	0	0	0	0	0	0	0	0	0	0	0	0	0	0	0	0	0	0	0	0	0	0	0	0	0	0	0	0	0	0	0	0	0	0	0	1	Major capsid protein	YSD1 bacteriophage capsid	N4-gp56 family major capsid protein	na
ERR11475043_NODE_132_curated_complete_322	138	1	0	0	0	0	0	0	0	0	0	0	0	0	0	0	0	0	0	0	0	0	0	0	0	0	0	0	0	0	0	0	0	0	0	0	0	0	0	1	Gifsy-2 prophage ATP-binding sugar transporter-like barrel, 4 helix bundle.7A	Crystal structure of the ATP-binding sugar transporter-like protein from Salmonella typhimurium	na	na
ERR11475043_NODE_132_curated_complete_323	236	1	0	0	0	0	0	0	0	0	0	0	0	0	0	0	0	0	0	0	0	0	0	0	0	0	0	0	0	0	0	0	0	0	0	0	0	0	0	1	Minor tail protein	na	HK97-gp10 family putative phage morphogenesis protein	na
ERR11475043_NODE_132_curated_complete_324	176	1	0	0	0	0	0	0	0	0	0	0	0	0	0	0	0	0	0	0	0	0	0	0	0	0	0	0	0	0	0	0	0	0	0	0	0	0	0	1	Tail completion protein	Tail cap of phage lambda tail	na	na
ERR11475043_NODE_132_curated_complete_325	103	1	0	0	0	0	0	0	0	0	0	0	0	0	0	0	0	0	0	0	0	0	0	0	0	0	0	0	0	0	0	0	0	0	0	0	0	0	0	1	Uncharacterized protein	na	na	na
ERR11475043_NODE_132_curated_complete_326	484	1	0	0	0	0	0	0	0	0	0	0	0	0	0	0	0	0	0	0	0	0	0	0	0	0	0	0	0	0	0	0	0	0	0	0	0	0	0	1	Sheath tube	CryoEM Structure of Pyocin R2 - precontracted - baseplate	na	na
ERR11475043_NODE_132_curated_complete_327	175	1	0	0	0	0	0	0	0	0	0	0	0	0	0	0	0	0	0	0	0	0	0	0	0	0	0	0	0	0	0	0	0	0	0	0	0	0	0	1	Tail tube protein	CryoEM Structure of Pyocin R2 - precontracted - collar	phage major tail tube protein	na
ERR11475043_NODE_132_curated_complete_328	219	1	0	0	0	0	0	0	0	0	0	0	0	0	0	0	0	0	0	0	0	0	0	0	0	0	0	0	0	0	0	0	0	0	0	0	0	0	0	1	Tail assembly chaperone protein	na	na	na
ERR11475043_NODE_132_curated_complete_329	1206	1	0	0	0	0	0	0	0	0	0	0	0	0	0	0	0	0	0	0	0	0	0	0	0	0	0	0	0	0	0	0	0	0	0	0	0	0	0	1	na	na	na	na
ERR11475043_NODE_132_curated_complete_330	71	1	0	0	0	0	0	0	0	0	0	0	0	0	0	0	0	0	0	0	0	0	0	0	0	0	0	0	0	0	0	0	0	0	0	0	0	0	0	1	LysM domain-containing protein	CryoEM Structure of Pyocin R2 - precontracted - baseplate	SafA/ExsA family spore coat assembly protein N-terminal domain	na
ERR11475043_NODE_132_curated_complete_331	459	1	0	0	0	0	0	0	0	0	0	0	0	0	0	0	0	0	0	0	0	0	0	0	0	0	0	0	0	0	0	0	0	0	0	0	0	0	0	1	Tail protein	Cryo-EM structure of the contractile injection system base plate from Anabaena PCC7120	VgrG-related protein	na
ERR11475043_NODE_132_curated_complete_332	321	1	0	0	0	0	0	0	0	0	0	0	0	0	0	0	0	0	0	0	0	0	0	0	0	0	0	0	0	0	0	0	0	0	0	0	0	0	0	1	Uncharacterized protein	na	na	na
ERR11475043_NODE_132_curated_complete_333	131	1	0	0	0	0	0	0	0	0	0	0	0	0	0	0	0	0	0	0	0	0	0	0	0	0	0	0	0	0	0	0	0	0	0	0	0	0	0	1	Uncharacterized protein	Cryo-EM Structure of an Extracellular Contractile Injection System, baseplate in extended state, refined in C6 symmetry	distal tail protein Dit	na
ERR11475043_NODE_132_curated_complete_334	105	1	0	0	0	0	0	0	0	0	0	0	0	0	0	0	0	0	0	0	0	0	0	0	0	0	0	0	0	0	0	0	0	0	0	0	0	0	0	1	Regulator of RpoS, Anti-adapter protein regulator, ClpXP adaptor, anti-adaptor.0A	CryoEM Structure of Pyocin R2 - precontracted - baseplate	type VI secretion system baseplate subunit TssE	na
ERR11475043_NODE_132_curated_complete_335	383	1	0	0	0	0	0	0	0	0	0	0	0	0	0	0	0	0	0	0	0	0	0	0	0	0	0	0	0	0	0	0	0	0	0	0	0	0	0	1	Putative baseplate J family protein	CryoEM Structure of Pyocin R2 - precontracted - baseplate	na	na
ERR11475043_NODE_132_curated_complete_336	273	1	0	0	0	0	0	0	0	0	0	0	0	0	0	0	0	0	0	0	0	0	0	0	0	0	0	0	0	0	0	0	0	0	0	0	0	0	0	1	na	na	na	na
ERR11475043_NODE_132_curated_complete_337	61	1	0	0	0	0	0	0	0	0	0	0	0	0	0	0	0	0	0	0	0	0	0	0	0	0	0	0	0	0	0	0	0	0	0	0	0	0	0	1	na	na	na	na
ERR11475043_NODE_132_curated_complete_338	104	1	0	0	0	0	0	0	0	0	0	0	0	0	0	0	0	0	0	0	0	0	0	0	0	0	0	0	0	0	0	0	0	0	0	0	0	0	0	1	Uncharacterized protein	na	na	na
ERR11475043_NODE_132_curated_complete_339	151	1	0	0	0	0	0	0	0	0	0	0	0	0	0	0	0	0	0	0	0	0	0	0	0	0	0	0	0	0	0	0	0	0	0	0	0	0	0	1	Capsid tail fiber	SLL-2-Forssman antigen tetrasaccharides complex	WIAG-tail domain	na
ERR11475043_NODE_132_curated_complete_340	126	1	0	0	0	0	0	0	0	0	0	0	0	0	0	0	0	0	0	0	0	0	0	0	0	0	0	0	0	0	0	0	0	0	0	0	0	0	0	1	Uncharacterized protein	na	na	na
ERR11475043_NODE_132_curated_complete_341	360	1	0	0	0	0	0	0	0	0	0	0	0	0	0	0	0	0	0	0	0	0	0	0	0	0	0	0	0	0	0	0	0	0	0	0	0	0	0	1	Sulfatase-modifying factor enzyme-like domain-containing protein	Thermus aquaticus variable protein (TaqVP) from diversity-generating retroelements (DGR)	na	na
ERR11475043_NODE_132_curated_complete_342	129	1	0	0	0	0	0	0	0	0	0	0	0	0	0	0	0	0	0	0	0	0	0	0	0	0	0	0	0	0	0	0	0	0	0	0	0	0	0	1	Avd-like protein	Avd molecule from Bordetella bacteriophage DGR	diversity-generating retroelement protein Avd	na
ERR11475043_NODE_132_curated_complete_343	412	1	0	0	0	0	0	0	0	0	0	0	0	0	0	0	0	0	0	0	0	0	0	0	0	0	0	0	0	0	0	0	0	0	0	0	0	0	0	1	Reverse transcriptase domain-containing protein	Structure of a Thermostable Group II Intron Reverse Transcriptase with Template-Primer and Its Functional and Evolutionary Implications (RT/Duplex (Nat))	group II intron reverse transcriptase/maturase	reverse transcriptase
ERR11475043_NODE_132_curated_complete_344	63	1	0	0	0	0	0	0	0	0	0	0	0	0	0	0	0	0	0	0	0	0	0	0	0	0	0	0	0	0	0	0	0	0	0	0	0	0	0	1	na	na	na	na
ERR11475043_NODE_132_curated_complete_345	103	1	0	0	0	0	0	0	0	0	0	0	0	0	0	0	0	0	0	0	0	0	0	0	0	0	0	0	0	0	0	0	0	0	0	0	0	0	0	1	Minor tail protein	na	na	na
ERR11475043_NODE_132_curated_complete_346	109	1	0	0	0	0	0	0	0	0	0	0	0	0	0	0	0	0	0	0	0	0	0	0	0	0	0	0	0	0	0	0	0	0	0	0	0	0	0	1	Integral membrane protein	na	na	na
ERR11475043_NODE_132_curated_complete_347	495	1	0	0	0	0	0	0	0	0	0	0	0	0	0	0	0	0	0	0	0	0	0	0	0	0	0	0	0	0	0	0	0	0	0	0	0	0	0	1	na	na	na	na
ERR11475043_NODE_132_curated_complete_348	125	1	0	0	0	0	0	0	0	0	0	0	0	0	0	0	0	0	0	0	0	0	0	0	0	0	0	0	0	0	0	0	0	0	0	0	0	0	0	1	Holin	Structure of the C-terminal fragment (87-165) of E.coli EAEC TssB molecule	phage holin	na
ERR11475043_NODE_132_curated_complete_349	357	1	0	0	0	0	0	0	0	0	0	0	0	0	0	0	0	0	0	0	0	0	0	0	0	0	0	0	0	0	0	0	0	0	0	0	0	0	0	1	na	Visna virus integrase (residues 1-219) in complex with LEDGF IBD: examples of open integrase dimer-dimer interfaces	Transposase IS30-like	na
ERR11475043_NODE_132_curated_complete_39	223	1	0	0	0	0	0	0	0	0	0	0	0	0	0	0	0	0	0	0	0	0	0	0	0	0	0	0	0	0	0	0	0	0	0	0	0	0	0	1	na	na	na	na
ERR11475043_NODE_132_curated_complete_47	77	1	0	0	0	0	0	0	0	0	0	0	0	0	0	0	0	0	0	0	0	0	0	0	0	0	0	0	0	0	0	0	0	0	0	0	0	0	0	1	na	na	na	na
ERR11475043_NODE_132_curated_complete_81	92	1	0	0	0	0	0	0	0	0	0	0	0	0	0	0	0	0	0	0	0	0	0	0	0	0	0	0	0	0	0	0	0	0	0	0	0	0	0	1	na	na	na	na
ERR11475043_NODE_132_curated_complete_96	43	1	0	0	0	0	0	0	0	0	0	0	0	0	0	0	0	0	0	0	0	0	0	0	0	0	0	0	0	0	0	0	0	0	0	0	0	0	0	1	na	na	na	na
ERR11566171_NODE_22_curated_complete_154	186	0	0	0	0	0	0	0	0	0	0	0	0	0	1	0	0	0	0	0	0	0	0	0	0	0	0	0	0	0	0	0	0	0	0	0	0	0	0	1	na	na	na	na
ERR11566171_NODE_22_curated_complete_156	78	0	0	0	0	0	0	0	0	0	0	0	0	0	1	0	0	0	0	0	0	0	0	0	0	0	0	0	0	0	0	0	0	0	0	0	0	0	0	1	na	na	na	na
ERR11566171_NODE_22_curated_complete_266	114	0	0	0	0	0	0	0	0	0	0	0	0	0	1	0	0	0	0	0	0	0	0	0	0	0	0	0	0	0	0	0	0	0	0	0	0	0	0	1	Transposase	na	na	na
ERR11566171_NODE_22_curated_complete_267	303	0	0	0	0	0	0	0	0	0	0	0	0	0	1	0	0	0	0	0	0	0	0	0	0	0	0	0	0	0	0	0	0	0	0	0	0	0	0	1	Integrase	Structure of the STLV intasome:B56 complex bound to the strand-transfer inhibitor XZ450	IS3 family transposase	na
ERR14838501_contig_2618_length_403255_complete_1	514	0	1	0	0	0	0	0	0	0	0	0	0	0	0	0	0	0	0	0	0	0	0	0	0	0	0	0	0	0	0	0	0	0	0	0	0	0	0	1	Transposase	Cryo-EM structure of the TnpB-omegaRNA-target DNA ternary complex	RNA-guided DNA endonuclease TnpB-like	na
ERR14838501_contig_2618_length_403255_complete_11	34	0	1	0	0	0	0	0	0	0	0	0	0	0	0	0	0	0	0	0	0	0	0	0	0	0	0	0	0	0	0	0	0	0	0	0	0	0	0	1	Uncharacterized protein	na	na	na
ERR14838501_contig_2618_length_403255_complete_144	52	0	1	0	0	0	0	0	0	0	0	0	0	0	0	0	0	0	0	0	0	0	0	0	0	0	0	0	0	0	0	0	0	0	0	0	0	0	0	1	Uncharacterized protein	na	na	na
ERR14838501_contig_2618_length_403255_complete_170	327	0	1	0	0	0	0	0	0	0	0	0	0	0	0	0	0	0	0	0	0	0	0	0	0	0	0	0	0	0	0	0	0	0	0	0	0	0	0	1	na	na	na	na
ERR14838501_contig_2618_length_403255_complete_183	264	0	1	0	0	0	0	0	0	0	0	0	0	0	0	0	0	0	0	0	0	0	0	0	0	0	0	0	0	0	0	0	0	0	0	0	0	0	0	1	na	na	na	na
ERR14838501_contig_2618_length_403255_complete_190	60	0	1	0	0	0	0	0	0	0	0	0	0	0	0	0	0	0	0	0	0	0	0	0	0	0	0	0	0	0	0	0	0	0	0	0	0	0	0	1	Transposon-encoded protein	na	na	na
ERR14838501_contig_2618_length_403255_complete_203	45	0	1	0	0	0	0	0	0	0	0	0	0	0	0	0	0	0	0	0	0	0	0	0	0	0	0	0	0	0	0	0	0	0	0	0	0	0	0	1	na	na	na	na
ERR14838501_contig_2618_length_403255_complete_204	66	0	1	0	0	0	0	0	0	0	0	0	0	0	0	0	0	0	0	0	0	0	0	0	0	0	0	0	0	0	0	0	0	0	0	0	0	0	0	1	4Fe-4S ferredoxin-type domain-containing protein	na	na	na
ERR14838501_contig_2618_length_403255_complete_206	160	0	1	0	0	0	0	0	0	0	0	0	0	0	0	0	0	0	0	0	0	0	0	0	0	0	0	0	0	0	0	0	0	0	0	0	0	0	0	1	Antirestriction protein	The structure of ArdA	na	na
ERR14838501_contig_2618_length_403255_complete_217	53	0	1	0	0	0	0	0	0	0	0	0	0	0	0	0	0	0	0	0	0	0	0	0	0	0	0	0	0	0	0	0	0	0	0	0	0	0	0	1	Transposon-encoded protein	na	na	na
ERR14838501_contig_2618_length_403255_complete_218	624	0	1	0	0	0	0	0	0	0	0	0	0	0	0	0	0	0	0	0	0	0	0	0	0	0	0	0	0	0	0	0	0	0	0	0	0	0	0	1	AAA domain containing protein	na	na	na
ERR14838501_contig_2618_length_403255_complete_219	499	0	1	0	0	0	0	0	0	0	0	0	0	0	0	0	0	0	0	0	0	0	0	0	0	0	0	0	0	0	0	0	0	0	0	0	0	0	0	1	na	na	na	na
ERR14838501_contig_2618_length_403255_complete_220	120	0	1	0	0	0	0	0	0	0	0	0	0	0	0	0	0	0	0	0	0	0	0	0	0	0	0	0	0	0	0	0	0	0	0	0	0	0	0	1	Internal scaffolding protein	na	na	na
ERR14838501_contig_2618_length_403255_complete_221	511	0	1	0	0	0	0	0	0	0	0	0	0	0	0	0	0	0	0	0	0	0	0	0	0	0	0	0	0	0	0	0	0	0	0	0	0	0	0	1	na	na	na	na
ERR14838501_contig_2618_length_403255_complete_222	95	0	1	0	0	0	0	0	0	0	0	0	0	0	0	0	0	0	0	0	0	0	0	0	0	0	0	0	0	0	0	0	0	0	0	0	0	0	0	1	Uncharacterized protein	na	na	na
ERR14838501_contig_2618_length_403255_complete_223	126	0	1	0	0	0	0	0	0	0	0	0	0	0	0	0	0	0	0	0	0	0	0	0	0	0	0	0	0	0	0	0	0	0	0	0	0	0	0	1	Holin	na	na	na
ERR14838501_contig_2618_length_403255_complete_224	971	0	1	0	0	0	0	0	0	0	0	0	0	0	0	0	0	0	0	0	0	0	0	0	0	0	0	0	0	0	0	0	0	0	0	0	0	0	0	1	na	na	na	na
ERR14838501_contig_2618_length_403255_complete_226	299	0	1	0	0	0	0	0	0	0	0	0	0	0	0	0	0	0	0	0	0	0	0	0	0	0	0	0	0	0	0	0	0	0	0	0	0	0	0	1	Replication initiator A family protein	na	na	na
ERR14838501_contig_2618_length_403255_complete_227	174	0	1	0	0	0	0	0	0	0	0	0	0	0	0	0	0	0	0	0	0	0	0	0	0	0	0	0	0	0	0	0	0	0	0	0	0	0	0	1	na	na	na	na
ERR14838501_contig_2618_length_403255_complete_265	106	0	1	0	0	0	0	0	0	0	0	0	0	0	0	0	0	0	0	0	0	0	0	0	0	0	0	0	0	0	0	0	0	0	0	0	0	0	0	1	na	na	na	na
ERR14838501_contig_2618_length_403255_complete_266	289	0	1	0	0	0	0	0	0	0	0	0	0	0	0	0	0	0	0	0	0	0	0	0	0	0	0	0	0	0	0	0	0	0	0	0	0	0	0	1	Uncharacterized protein	na	na	na
ERR14838501_contig_2618_length_403255_complete_267	221	0	1	0	0	0	0	0	0	0	0	0	0	0	0	0	0	0	0	0	0	0	0	0	0	0	0	0	0	0	0	0	0	0	0	0	0	0	0	1	VIP2-like ADP-ribosyltransferase toxin	Exoenzyme S from Pseudomonas aeruginosa in complex with human 14-3-3 protein beta, trimeric crystal form bound to Carba-NAD	na	na
ERR14838501_contig_2618_length_403255_complete_268	246	0	1	0	0	0	0	0	0	0	0	0	0	0	0	0	0	0	0	0	0	0	0	0	0	0	0	0	0	0	0	0	0	0	0	0	0	0	0	1	Uncharacterized protein	na	na	na
ERR14838501_contig_2618_length_403255_complete_316	227	0	1	0	0	0	0	0	0	0	0	0	0	0	0	0	0	0	0	0	0	0	0	0	0	0	0	0	0	0	0	0	0	0	0	0	0	0	0	1	PfWMP3_05	The structure of a bacterial homing endonuclease : I-Ssp6803I	na	na
ERR14838501_contig_2618_length_403255_complete_388	86	0	1	0	0	0	0	0	0	0	0	0	0	0	0	0	0	0	0	0	0	0	0	0	0	0	0	0	0	0	0	0	0	0	0	0	0	0	0	1	Helix-turn-helix DNA binding domain protein	70S ribosome with EF-G, A*- and P/E-site tRNAs in pseudouridimycin-treated Mycoplasma pneumoniae cells	DNA polymerase III subunit theta	na
ERR14838501_contig_2618_length_403255_complete_403	48	0	1	0	0	0	0	0	0	0	0	0	0	0	0	0	0	0	0	0	0	0	0	0	0	0	0	0	0	0	0	0	0	0	0	0	0	0	0	1	na	na	na	na
ERR14838501_contig_2618_length_403255_complete_408	86	0	1	0	0	0	0	0	0	0	0	0	0	0	0	0	0	0	0	0	0	0	0	0	0	0	0	0	0	0	0	0	0	0	0	0	0	0	0	1	na	na	na	na
ERR14838501_contig_2618_length_403255_complete_5	201	0	1	0	0	0	0	0	0	0	0	0	0	0	0	0	0	0	0	0	0	0	0	0	0	0	0	0	0	0	0	0	0	0	0	0	0	0	0	1	DUF6273 domain-containing protein	na	na	na
ERR14838502_contig_1965_length_377046_start_adj_complete_112	296	0	0	0	0	0	0	0	0	0	0	0	0	0	0	1	0	0	0	0	0	0	0	0	0	0	0	0	0	0	0	0	0	0	0	0	0	0	0	1	Helix-turn-helix domain containing protein	na	na	na
ERR14838502_contig_1965_length_377046_start_adj_complete_121	213	0	0	0	0	0	0	0	0	0	0	0	0	0	0	1	0	0	0	0	0	0	0	0	0	0	0	0	0	0	0	0	0	0	0	0	0	0	0	1	Phosphoadenosine phosphosulfate reductase	Crystal structure of adenosine-5'-phosphosulfate reductase from Mycobacterium tuberculosis in a complex with substrate APS	adenylylsulfate reductase, thioredoxin dependent	na
ERR14838502_contig_1965_length_377046_start_adj_complete_125	79	0	0	0	0	0	0	0	0	0	0	0	0	0	0	1	0	0	0	0	0	0	0	0	0	0	0	0	0	0	0	0	0	0	0	0	0	0	0	1	na	na	na	na
ERR14838502_contig_1965_length_377046_start_adj_complete_13	275	0	0	0	0	0	0	0	0	0	0	0	0	0	0	1	0	0	0	0	0	0	0	0	0	0	0	0	0	0	0	0	0	0	0	0	0	0	0	1	na	na	na	na
ERR14838502_contig_1965_length_377046_start_adj_complete_14	169	0	0	0	0	0	0	0	0	0	0	0	0	0	0	1	0	0	0	0	0	0	0	0	0	0	0	0	0	0	0	0	0	0	0	0	0	0	0	1	na	na	na	na
ERR14838502_contig_1965_length_377046_start_adj_complete_15	190	0	0	0	0	0	0	0	0	0	0	0	0	0	0	1	0	0	0	0	0	0	0	0	0	0	0	0	0	0	0	0	0	0	0	0	0	0	0	1	Uncharacterized protein	na	na	na
ERR14838502_contig_1965_length_377046_start_adj_complete_2	392	0	0	0	0	0	0	0	0	0	0	0	0	0	0	2	0	0	0	0	0	0	0	0	0	0	0	0	0	0	0	0	0	0	0	0	0	0	0	1	Transposase IS116/IS110/IS902 family protein	Structure of a hPrp31-15.5K-U4atac 5' stem loop complex, dimeric form	IS110 family transposase	na
ERR14838502_contig_1965_length_377046_start_adj_complete_376	118	0	0	0	0	0	0	0	0	0	0	0	0	0	0	1	0	0	0	0	0	0	0	0	0	0	0	0	0	0	0	0	0	0	0	0	0	0	0	1	Transposase	INHIBITED FRAGMENT OF ETS-1 AND PAIRED DOMAIN OF PAX5 BOUND TO DNA	na	na
ERR3450778_NODE_10_curated_final_260	50	0	0	0	0	0	0	0	0	0	0	0	0	0	0	0	0	0	0	0	0	0	0	0	0	0	0	0	0	0	0	0	0	0	0	0	0	1	0	1	na	na	na	na
ERR3450778_NODE_10_curated_final_283	125	0	0	0	0	0	0	0	0	0	0	0	0	0	0	0	0	0	0	0	0	0	0	0	0	0	0	0	0	0	0	0	0	0	0	0	0	1	0	1	Endonuclease	ISDra2 TnpB in complex with reRNA and cognate DNA, conformation 2 (RuvC domain unresolved)	transposase, putative, N-terminal domain	na
ERR3450778_NODE_10_curated_final_57	83	0	0	0	0	0	0	0	0	0	0	0	0	0	0	0	0	0	0	0	0	0	0	0	0	0	0	0	0	0	0	0	0	0	0	0	0	1	0	1	Gp623	na	na	na
ERR3450778_NODE_10_curated_final_58	263	0	0	0	0	0	0	0	0	0	0	0	0	0	0	0	0	0	0	0	0	0	0	0	0	0	0	0	0	0	0	0	0	0	0	0	0	1	0	1	na	na	na	na
ERR3450778_NODE_10_curated_final_63	115	0	0	0	0	0	0	0	0	0	0	0	0	0	0	0	0	0	0	0	0	0	0	0	0	0	0	0	0	0	0	0	0	0	0	0	0	1	0	1	Uncharacterized protein	na	na	na
ERR4334199_NODE_10_curated_complete_294	287	0	0	0	0	0	0	0	0	0	0	0	0	0	0	0	1	0	0	0	0	0	0	0	0	0	0	0	0	0	0	0	0	0	0	0	0	0	0	1	na	na	na	na
ERR4334199_NODE_10_curated_complete_355	84	0	0	0	0	0	0	0	0	0	0	0	0	0	0	0	1	0	0	0	0	0	0	0	0	0	0	0	0	0	0	0	0	0	0	0	0	0	0	1	na	na	na	na
ERR4341740_NODE_51_curated_complete_1	46	0	0	0	0	0	0	0	0	0	0	0	0	0	0	0	0	1	0	0	0	0	0	0	0	0	0	0	0	0	0	0	0	0	0	0	0	0	0	1	na	na	na	na
ERR4341740_NODE_51_curated_complete_196	115	0	0	0	0	0	0	0	0	0	0	0	0	0	0	0	0	1	0	0	0	0	0	0	0	0	0	0	0	0	0	0	0	0	0	0	0	0	0	1	Uncharacterized protein	na	na	na
ERR4341740_NODE_51_curated_complete_197	131	0	0	0	0	0	0	0	0	0	0	0	0	0	0	0	0	1	0	0	0	0	0	0	0	0	0	0	0	0	0	0	0	0	0	0	0	0	0	1	na	na	na	na
ERR4341740_NODE_51_curated_complete_198	167	0	0	0	0	0	0	0	0	0	0	0	0	0	0	0	0	1	0	0	0	0	0	0	0	0	0	0	0	0	0	0	0	0	0	0	0	0	0	1	Uncharacterized protein	Crystal structure of the SAM-dependent methyltransferase cg3271 from Corynebacterium glutamicum in complex with S-adenosyl-L-homocysteine and pyrophosphate. Northeast Structural Genomics Consortium Target CgR113A	mycofactocin oligosaccharide methyltransferase MftM	na
ERR4341740_NODE_51_curated_complete_300	194	0	0	0	0	0	0	0	0	0	0	0	0	0	0	0	0	1	0	0	0	0	0	0	0	0	0	0	0	0	0	0	0	0	0	0	0	0	0	1	Uncharacterized protein	na	na	na
ERR4341740_NODE_51_curated_complete_323	51	0	0	0	0	0	0	0	0	0	0	0	0	0	0	0	0	1	0	0	0	0	0	0	0	0	0	0	0	0	0	0	0	0	0	0	0	0	0	1	na	na	na	na
ERR4341740_NODE_51_curated_complete_328	383	0	0	0	0	0	0	0	0	0	0	0	0	0	0	0	0	1	0	0	0	0	0	0	0	0	0	0	0	0	0	0	0	0	0	0	0	0	0	1	na	Crystal structure of Type-I restriction-modification system S subunit from M. genitalium	na	na
ERR4341740_NODE_51_curated_complete_329	171	0	0	0	0	0	0	0	0	0	0	0	0	0	0	0	0	1	0	0	0	0	0	0	0	0	0	0	0	0	0	0	0	0	0	0	0	0	0	1	na	na	na	na
ERR4341740_NODE_51_curated_complete_330	180	0	0	0	0	0	0	0	0	0	0	0	0	0	0	0	0	1	0	0	0	0	0	0	0	0	0	0	0	0	0	0	0	0	0	0	0	0	0	1	Uncharacterized protein	na	na	na
ERR4341740_NODE_51_curated_complete_5	59	0	0	0	0	0	0	0	0	0	0	0	0	0	0	0	0	1	0	0	0	0	0	0	0	0	0	0	0	0	0	0	0	0	0	0	0	0	0	1	Rhomboid N-terminal domain	Crystal Structure of a Lanthipeptide Protease	DUF2007-related protein	na
ERR6395353_NODE_54_curated_final_144	432	0	0	0	0	0	0	0	0	0	0	0	0	0	0	0	0	0	1	0	0	0	0	0	0	0	0	0	0	0	0	0	0	0	0	0	0	0	0	1	na	na	na	na
ERR6395353_NODE_54_curated_final_95	317	0	0	0	0	0	0	0	0	0	0	0	0	0	0	0	0	0	1	0	0	0	0	0	0	0	0	0	0	0	0	0	0	0	0	0	0	0	0	1	N-6 DNA Methylase	na	na	na
ERR6395353_NODE_54_curated_final_96	340	0	0	0	0	0	0	0	0	0	0	0	0	0	0	0	0	0	1	0	0	0	0	0	0	0	0	0	0	0	0	0	0	0	0	0	0	0	0	1	Restriction-modification methylase	na	Alw26I/Eco31I/Esp3I family type II restriction adenine-specific DNA-methyltransferase	na
ERR6395353_NODE_54_curated_final_97	1103	0	0	0	0	0	0	0	0	0	0	0	0	0	0	0	0	0	1	0	0	0	0	0	0	0	0	0	0	0	0	0	0	0	0	0	0	0	0	1	na	na	na	na
ERR9250082_NODE_7_curated_complete_279	293	0	0	0	0	0	0	0	0	0	0	0	0	0	0	0	0	0	0	1	0	0	0	0	0	0	0	0	0	0	0	0	0	0	0	0	0	0	0	1	na	na	na	na
huge_phage_1554_curated_complete_1	55	0	0	0	0	0	0	0	0	0	0	0	0	0	0	0	0	0	0	0	1	0	0	0	0	0	0	0	0	0	0	0	0	0	0	0	0	0	0	1	na	na	na	na
huge_phage_1554_curated_complete_186	103	0	0	0	0	0	0	0	0	0	0	0	0	0	0	0	0	0	0	0	1	0	0	0	0	0	0	0	0	0	0	0	0	0	0	0	0	0	0	1	Uncharacterized protein	na	na	na
huge_phage_1554_curated_complete_379	138	0	0	0	0	0	0	0	0	0	0	0	0	0	0	0	0	0	0	0	1	0	0	0	0	0	0	0	0	0	0	0	0	0	0	0	0	0	0	1	na	na	na	na
huge_phage_1554_curated_complete_44	63	0	0	0	0	0	0	0	0	0	0	0	0	0	0	0	0	0	0	0	1	0	0	0	0	0	0	0	0	0	0	0	0	0	0	0	0	0	0	1	Restriction alleviation protein	Apo RNA Polymerase III - closed conformation (cPOL3)	type I toxin-antitoxin system endodeoxyribonuclease toxin RalR	na
huge_phage_1554_curated_complete_45	194	0	0	0	0	0	0	0	0	0	0	0	0	0	0	0	0	0	0	0	1	0	0	0	0	0	0	0	0	0	0	0	0	0	0	0	0	0	0	1	DUF6273 domain-containing protein	Structure of Legionella pneumophila Lcl C-terminal domain	na	na
huge_phage_1888_curated_final_1	43	0	0	0	0	0	0	0	0	0	0	0	0	0	0	0	0	0	0	0	0	1	0	0	0	0	0	0	0	0	0	0	0	0	0	0	0	0	0	1	RNA polymerase sigma-70 region 4	RNA polymerase alpha C-terminal domain (E. coli) and sigma region 4 (T. aq. mutant) bound to (UP,-35 element) DNA	na	na
huge_phage_1888_curated_final_112	338	0	0	0	0	0	0	0	0	0	0	0	0	0	0	0	0	0	0	0	0	1	0	0	0	0	0	0	0	0	0	0	0	0	0	0	0	0	0	1	na	na	na	na
huge_phage_1888_curated_final_2	79	0	0	0	0	0	0	0	0	0	0	0	0	0	0	0	0	0	0	0	0	1	0	0	0	0	0	0	0	0	0	0	0	0	0	0	0	0	0	1	Uncharacterized protein	Crystal structure of the complex formed by region of E. coli sigmaE bound to its -10 element non template strand	na	na
huge_phage_1888_curated_final_210	98	0	0	0	0	0	0	0	0	0	0	0	0	0	0	0	0	0	0	0	0	1	0	0	0	0	0	0	0	0	0	0	0	0	0	0	0	0	0	1	na	na	na	na
huge_phage_1888_curated_final_285	129	0	0	0	0	0	0	0	0	0	0	0	0	0	0	0	0	0	0	0	0	1	0	0	0	0	0	0	0	0	0	0	0	0	0	0	0	0	0	1	na	na	na	na
huge_phage_2159_curated_complete_120	146	0	0	1	0	0	0	0	0	0	0	0	0	0	0	0	0	0	0	0	0	0	0	0	0	0	0	0	0	0	0	0	0	0	0	0	0	0	0	1	na	na	na	na
huge_phage_2159_curated_complete_134	208	0	0	1	0	0	0	0	0	0	0	0	0	0	0	0	0	0	0	0	0	0	0	0	0	0	0	0	0	0	0	0	0	0	0	0	0	0	0	1	na	na	na	na
huge_phage_2159_curated_complete_141	371	0	0	1	0	0	0	0	0	0	0	0	0	0	0	0	0	0	0	0	0	0	0	0	0	0	0	0	0	0	0	0	0	0	0	0	0	0	0	1	Type I restriction modification DNA specificity domain-containing protein	Crystal structure of Type-I restriction-modification system S subunit from M. genitalium	na	na
huge_phage_2159_curated_complete_193	148	0	0	1	0	0	0	0	0	0	0	0	0	0	0	0	0	0	0	0	0	0	0	0	0	0	0	0	0	0	0	0	0	0	0	0	0	0	0	1	na	na	na	na
huge_phage_2159_curated_complete_194	82	0	0	1	0	0	0	0	0	0	0	0	0	0	0	0	0	0	0	0	0	0	0	0	0	0	0	0	0	0	0	0	0	0	0	0	0	0	0	1	na	na	na	na
huge_phage_2159_curated_complete_228	81	0	0	1	0	0	0	0	0	0	0	0	0	0	0	0	0	0	0	0	0	0	0	0	0	0	0	0	0	0	0	0	0	0	0	0	0	0	0	1	Uncharacterized protein	na	na	na
huge_phage_2159_curated_complete_303	1050	0	0	1	0	0	0	0	0	0	0	0	0	0	0	0	0	0	0	0	0	0	0	0	0	0	0	0	0	0	0	0	0	0	0	0	0	0	0	1	na	na	na	na
huge_phage_2159_curated_complete_304	456	0	0	1	0	0	0	0	0	0	0	0	0	0	0	0	0	0	0	0	0	0	0	0	0	0	0	0	0	0	0	0	0	0	0	0	0	0	0	1	na	na	na	na
huge_phage_2159_curated_complete_305	146	0	0	1	0	0	0	0	0	0	0	0	0	0	0	0	0	0	0	0	0	0	0	0	0	0	0	0	0	0	0	0	0	0	0	0	0	0	0	1	na	Envelope protein VP37 a crystal structure from White Spot Syndrome Virus	fimbrial protein TcfB	na
huge_phage_2159_curated_complete_306	263	0	0	1	0	0	0	0	0	0	0	0	0	0	0	0	0	0	0	0	0	0	0	0	0	0	0	0	0	0	0	0	0	0	0	0	0	0	0	1	na	na	na	na
huge_phage_2159_curated_complete_338	124	0	0	1	0	0	0	0	0	0	0	0	0	0	0	0	0	0	0	0	0	0	0	0	0	0	0	0	0	0	0	0	0	0	0	0	0	0	0	1	na	na	na	na
huge_phage_2159_curated_complete_365	101	0	0	1	0	0	0	0	0	0	0	0	0	0	0	0	0	0	0	0	0	0	0	0	0	0	0	0	0	0	0	0	0	0	0	0	0	0	0	1	Nonstructural protein	na	na	na
huge_phage_2159_curated_complete_368	67	0	0	1	0	0	0	0	0	0	0	0	0	0	0	0	0	0	0	0	0	0	0	0	0	0	0	0	0	0	0	0	0	0	0	0	0	0	0	1	Small CPxCG-related zinc finger protein	na	na	na
huge_phage_2159_curated_complete_374	36	0	0	1	0	0	0	0	0	0	0	0	0	0	0	0	0	0	0	0	0	0	0	0	0	0	0	0	0	0	0	0	0	0	0	0	0	0	0	1	na	na	na	na
huge_phage_2159_curated_complete_81	623	0	0	1	0	0	0	0	0	0	0	0	0	0	0	0	0	0	0	0	0	0	0	0	0	0	0	0	0	0	0	0	0	0	0	0	0	0	0	1	na	na	na	na
huge_phage_2159_curated_complete_83	764	0	0	1	0	0	0	0	0	0	0	0	0	0	0	0	0	0	0	0	0	0	0	0	0	0	0	0	0	0	0	0	0	0	0	0	0	0	0	1	na	na	na	na
huge_phage_2159_curated_complete_84	281	0	0	1	0	0	0	0	0	0	0	0	0	0	0	0	0	0	0	0	0	0	0	0	0	0	0	0	0	0	0	0	0	0	0	0	0	0	0	1	na	na	na	na
huge_phage_2782_curated_complete_141	119	0	0	0	1	0	0	0	0	0	0	0	0	0	0	0	0	0	0	0	0	0	0	0	0	0	0	0	0	0	0	0	0	0	0	0	0	0	0	1	na	na	na	na
huge_phage_2782_curated_complete_142	273	0	0	0	1	0	0	0	0	0	0	0	0	0	0	0	0	0	0	0	0	0	0	0	0	0	0	0	0	0	0	0	0	0	0	0	0	0	0	1	na	na	na	na
huge_phage_2782_curated_complete_146	361	0	0	0	1	0	0	0	0	0	0	0	0	0	0	0	0	0	0	0	0	0	0	0	0	0	0	0	0	0	0	0	0	0	0	0	0	0	0	1	na	Three-dimensional structure of DNA sequence specificity (S) subunit of a type I restriction-modification enzyme and its functional implications	type I restriction-modification system specificity subunit	na
huge_phage_2782_curated_complete_162	207	0	0	0	1	0	0	0	0	0	0	0	0	0	0	0	0	0	0	0	0	0	0	0	0	0	0	0	0	0	0	0	0	0	0	0	0	0	0	1	na	na	na	na
huge_phage_2782_curated_complete_200	79	0	0	0	1	0	0	0	0	0	0	0	0	0	0	0	0	0	0	0	0	0	0	0	0	0	0	0	0	0	0	0	0	0	0	0	0	0	0	1	Uncharacterized protein	N-terminal domain of S. aureus GpsB in complex with PBP4 fragment	na	na
huge_phage_2782_curated_complete_370	181	0	0	0	1	0	0	0	0	0	0	0	0	0	0	0	0	0	0	0	0	0	0	0	0	0	0	0	0	0	0	0	0	0	0	0	0	0	0	1	na	na	na	na
huge_phage_2782_curated_complete_82	149	0	0	0	1	0	0	0	0	0	0	0	0	0	0	0	0	0	0	0	0	0	0	0	0	0	0	0	0	0	0	0	0	0	0	0	0	0	0	1	na	na	na	na
huge_phage_2979_curated_complete_152	132	0	0	0	0	0	0	0	0	0	0	0	0	0	0	0	0	0	0	0	0	0	1	0	0	0	0	0	0	0	0	0	0	0	0	0	0	0	0	1	Uncharacterized protein	The III2-IV(5B)1 respiratory supercomplex from S. cerevisiae	exosortase K	na
huge_phage_2979_curated_complete_153	81	0	0	0	0	0	0	0	0	0	0	0	0	0	0	0	0	0	0	0	0	0	1	0	0	0	0	0	0	0	0	0	0	0	0	0	0	0	0	1	na	na	na	na
huge_phage_2979_curated_complete_297	320	0	0	0	0	0	0	0	0	0	0	0	0	0	0	0	0	0	0	0	0	0	1	0	0	0	0	0	0	0	0	0	0	0	0	0	0	0	0	1	na	na	na	na
huge_phage_3334_curated_complete_10	54	0	0	0	0	1	0	0	0	0	0	0	0	0	0	0	0	0	0	0	0	0	0	0	0	0	0	0	0	0	0	0	0	0	0	0	0	0	0	1	XkdX family protein	Crystal structure of Bacillus subtilis SPP1 phage gp23.1, a putative chaperone.	XkdX family protein	na
huge_phage_3334_curated_complete_11	115	0	0	0	0	1	0	0	0	0	0	0	0	0	0	0	0	0	0	0	0	0	0	0	0	0	0	0	0	0	0	0	0	0	0	0	0	0	0	1	Cotton fiber expressed protein	na	na	na
huge_phage_3334_curated_complete_12	401	0	0	0	0	1	0	0	0	0	0	0	0	0	0	0	0	0	0	0	0	0	0	0	0	0	0	0	0	0	0	0	0	0	0	0	0	0	0	1	Reverse transcriptase domain-containing protein	Structure of a Thermostable Group II Intron Reverse Transcriptase with Template-Primer and Its Functional and Evolutionary Implications (RT/Duplex (Nat))	group II intron reverse transcriptase/maturase	reverse transcriptase
huge_phage_3334_curated_complete_13	886	0	0	0	0	1	0	0	0	0	0	0	0	0	0	0	0	0	0	0	0	0	0	0	0	0	0	0	0	0	0	0	0	0	0	0	0	0	0	1	Tail fiber protein	na	na	na
huge_phage_3334_curated_complete_14	85	0	0	0	0	1	0	0	0	0	0	0	0	0	0	0	0	0	0	0	0	0	0	0	0	0	0	0	0	0	0	0	0	0	0	0	0	0	0	1	Nucleotide modification associated domain-containing protein	Crystal structure of the coiled-coil domain from Listeria Innocua (Tetragonal Form)	SE1832 family small protein	na
huge_phage_3334_curated_complete_15	945	0	0	0	0	1	0	0	0	0	0	0	0	0	0	0	0	0	0	0	0	0	0	0	0	0	0	0	0	0	0	0	0	0	0	0	0	0	0	1	na	na	na	na
huge_phage_3334_curated_complete_16	234	0	0	0	0	1	0	0	0	0	0	0	0	0	0	0	0	0	0	0	0	0	0	0	0	0	0	0	0	0	0	0	0	0	0	0	0	0	0	1	Distal tail protein	Crystal Structure of SPP1 Dit (gp 19.1) Protein, a Paradigm of Hub Adsorption Apparatus in Gram-positive Infecting Phages.	distal tail protein Dit	na
huge_phage_3334_curated_complete_17	945	0	0	0	0	1	0	0	0	0	0	0	0	0	0	0	0	0	0	0	0	0	0	0	0	0	0	0	0	0	0	0	0	0	0	0	0	0	0	1	na	na	na	na
huge_phage_3334_curated_complete_18	173	0	0	0	0	1	0	0	0	0	0	0	0	0	0	0	0	0	0	0	0	0	0	0	0	0	0	0	0	0	0	0	0	0	0	0	0	0	0	1	Uncharacterized protein	na	na	na
huge_phage_3334_curated_complete_19	108	0	0	0	0	1	0	0	0	0	0	0	0	0	0	0	0	0	0	0	0	0	0	0	0	0	0	0	0	0	0	0	0	0	0	0	0	0	0	1	Uncharacterized protein	na	exodeoxyribonuclease VII small subunit	na
huge_phage_3334_curated_complete_20	213	0	0	0	0	1	0	0	0	0	0	0	0	0	0	0	0	0	0	0	0	0	0	0	0	0	0	0	0	0	0	0	0	0	0	0	0	0	0	1	Major tail protein	Cryo-EM structure of the anti-feeding prophage cap (AFP tube terminating cap)	phage major tail protein, phi13 family	na
huge_phage_3334_curated_complete_21	118	0	0	0	0	1	0	0	0	0	0	0	0	0	0	0	0	0	0	0	0	0	0	0	0	0	0	0	0	0	0	0	0	0	0	0	0	0	0	1	Tail component	Listeria monocytogenes Antigen B	na	na
huge_phage_3334_curated_complete_22	151	0	0	0	0	1	0	0	0	0	0	0	0	0	0	0	0	0	0	0	0	0	0	0	0	0	0	0	0	0	0	0	0	0	0	0	0	0	0	1	Type I neck protein	na	HK97-gp10 family putative phage morphogenesis protein	na
huge_phage_3334_curated_complete_23	109	0	0	0	0	1	0	0	0	0	0	0	0	0	0	0	0	0	0	0	0	0	0	0	0	0	0	0	0	0	0	0	0	0	0	0	0	0	0	1	Putative head tail adaptor	gp6/gp15/gp16 connector complex of bacteriophage SPP1	phage head closure protein	na
huge_phage_3334_curated_complete_24	104	0	0	0	0	1	0	0	0	0	0	0	0	0	0	0	0	0	0	0	0	0	0	0	0	0	0	0	0	0	0	0	0	0	0	0	0	0	0	1	Tail connector protein	na	head-tail connector protein	na
huge_phage_3334_curated_complete_25	399	0	0	0	0	1	0	0	0	0	0	0	0	0	0	0	0	0	0	0	0	0	0	0	0	0	0	0	0	0	0	0	0	0	0	0	0	0	0	1	Major capsid protein	Capsid of native GTA particle computed with C5 symmetry	phage major capsid protein, HK97 family	na
huge_phage_3334_curated_complete_26	272	0	0	0	0	1	0	0	0	0	0	0	0	0	0	0	0	0	0	0	0	0	0	0	0	0	0	0	0	0	0	0	0	0	0	0	0	0	0	1	ATP-dependent Clp protease proteolytic subunit	ClpP1/2 heterocomplex from Listeria monocytogenes	ATP-dependent Clp endopeptidase proteolytic subunit ClpP	na
huge_phage_3334_curated_complete_27	487	0	0	0	0	1	0	0	0	0	0	0	0	0	0	0	0	0	0	0	0	0	0	0	0	0	0	0	0	0	0	0	0	0	0	0	0	0	0	1	COG4695 Phage-related protein	Portal vertex of HK97 phage	phage portal protein	na
huge_phage_3334_curated_complete_279	105	0	0	0	0	1	0	0	0	0	0	0	0	0	0	0	0	0	0	0	0	0	0	0	0	0	0	0	0	0	0	0	0	0	0	0	0	0	0	1	na	na	na	na
huge_phage_3334_curated_complete_28	586	0	0	0	0	1	0	0	0	0	0	0	0	0	0	0	0	0	0	0	0	0	0	0	0	0	0	0	0	0	0	0	0	0	0	0	0	0	0	1	Terminase large subunit	Crystal structure of the HK97 bacteriophage large terminase	PBSX family phage terminase large subunit	na
huge_phage_3334_curated_complete_29	188	0	0	0	0	1	0	0	0	0	0	0	0	0	0	0	0	0	0	0	0	0	0	0	0	0	0	0	0	0	0	0	0	0	0	0	0	0	0	1	COG3747 Phage terminase, small subunit	HK97 small terminase in complex with DNA	phage terminase small subunit P27 family	na
huge_phage_3334_curated_complete_30	158	0	0	0	0	1	0	0	0	0	0	0	0	0	0	0	0	0	0	0	0	0	0	0	0	0	0	0	0	0	0	0	0	0	0	0	0	0	0	1	NinG protein	Crystal structure of deep-sea thermophilic bacteriophage GVE2 HNH endonuclease with manganese ion	na	na
huge_phage_3334_curated_complete_31	107	0	0	0	0	1	0	0	0	0	0	0	0	0	0	0	0	0	0	0	0	0	0	0	0	0	0	0	0	0	0	0	0	0	0	0	0	0	0	1	na	na	na	na
huge_phage_3334_curated_complete_32	177	0	0	0	0	1	0	0	0	0	0	0	0	0	0	0	0	0	0	0	0	0	0	0	0	0	0	0	0	0	0	0	0	0	0	0	0	0	0	1	Uncharacterized protein	na	phage transcriptional regulator, RinA family	na
huge_phage_3334_curated_complete_33	229	0	0	0	0	1	0	0	0	0	0	0	0	0	0	0	0	0	0	0	0	0	0	0	0	0	0	0	0	0	0	0	0	0	0	0	0	0	0	1	na	DNA N6-Adenine Methyltransferase CcrM In Complex with Double-Stranded DNA Oligonucleotide Containing Its Recognition Sequence GAATC	adenine-specific DNA-methyltransferase	na
huge_phage_3334_curated_complete_34	186	0	0	0	0	1	0	0	0	0	0	0	0	0	0	0	0	0	0	0	0	0	0	0	0	0	0	0	0	0	0	0	0	0	0	0	0	0	0	1	Nucleotidase 5'-nucleotidase	Structure of the conserved protein coded by locus BT_0820 from Bacteroides thetaiotaomicron	capsule biosynthesis phosphatase	na
huge_phage_3334_curated_complete_35	179	0	0	0	0	1	0	0	0	0	0	0	0	0	0	0	0	0	0	0	0	0	0	0	0	0	0	0	0	0	0	0	0	0	0	0	0	0	0	1	Uncharacterized protein	na	na	na
huge_phage_3334_curated_complete_36	142	0	0	0	0	1	0	0	0	0	0	0	0	0	0	0	0	0	0	0	0	0	0	0	0	0	0	0	0	0	0	0	0	0	0	0	0	0	0	1	ASCH domain-containing protein	Crystal structure of ASCH from Zymomonas mobilis	N(4)-acetylcytidine aminohydrolase	na
huge_phage_3334_curated_complete_37	66	0	0	0	0	1	0	0	0	0	0	0	0	0	0	0	0	0	0	0	0	0	0	0	0	0	0	0	0	0	0	0	0	0	0	0	0	0	0	1	MYND-type domain-containing protein	na	Actinobacterial multiple cyclophane triceptide AmcA, group 3b	na
huge_phage_3334_curated_complete_38	189	0	0	0	0	1	0	0	0	0	0	0	0	0	0	0	0	0	0	0	0	0	0	0	0	0	0	0	0	0	0	0	0	0	0	0	0	0	0	1	IME4 Transcriptional activator, adenine-specific DNA methyltransferase	Human METTL3-METTL14 complex	DNA methyltransferase	na
huge_phage_3334_curated_complete_39	484	0	0	0	0	1	0	0	0	0	0	0	0	0	0	0	0	0	0	0	0	0	0	0	0	0	0	0	0	0	0	0	0	0	0	0	0	0	0	1	Chromosome partitioning protein	na	ParB family protein, PFGI_1 class integrating conjugative element	na
huge_phage_3334_curated_complete_40	268	0	0	0	0	1	0	0	0	0	0	0	0	0	0	0	0	0	0	0	0	0	0	0	0	0	0	0	0	0	0	0	0	0	0	0	0	0	0	1	CobQ/CobB/MinD/ParA nucleotide binding domain protein	Structure of the bacterial chromosome segregation protein Soj	plasmid partitioning protein RepA	na
huge_phage_3334_curated_complete_41	139	0	0	0	0	1	0	0	0	0	0	0	0	0	0	0	0	0	0	0	0	0	0	0	0	0	0	0	0	0	0	0	0	0	0	0	0	0	0	1	Nuclease	VRR_NUC domain protein	na	na
huge_phage_3334_curated_complete_42	419	0	0	0	0	1	0	0	0	0	0	0	0	0	0	0	0	0	0	0	0	0	0	0	0	0	0	0	0	0	0	0	0	0	0	0	0	0	0	1	Replication associated protein	na	na	na
huge_phage_3334_curated_complete_43	123	0	0	0	0	1	0	0	0	0	0	0	0	0	0	0	0	0	0	0	0	0	0	0	0	0	0	0	0	0	0	0	0	0	0	0	0	0	0	1	Uncharacterized protein	na	na	na
huge_phage_3334_curated_complete_44	39	0	0	0	0	1	0	0	0	0	0	0	0	0	0	0	0	0	0	0	0	0	0	0	0	0	0	0	0	0	0	0	0	0	0	0	0	0	0	1	Uncharacterized protein	na	na	na
huge_phage_3334_curated_complete_45	53	0	0	0	0	1	0	0	0	0	0	0	0	0	0	0	0	0	0	0	0	0	0	0	0	0	0	0	0	0	0	0	0	0	0	0	0	0	0	1	Uncharacterized protein	Dimerization domain of TP901-1 CI repressor	na	na
huge_phage_3334_curated_complete_46	155	0	0	0	0	1	0	0	0	0	0	0	0	0	0	0	0	0	0	0	0	0	0	0	0	0	0	0	0	0	0	0	0	0	0	0	0	0	0	1	na	na	na	na
huge_phage_3334_curated_complete_47	145	0	0	0	0	1	0	0	0	0	0	0	0	0	0	0	0	0	0	0	0	0	0	0	0	0	0	0	0	0	0	0	0	0	0	0	0	0	0	1	na	na	na	na
huge_phage_3334_curated_complete_48	50	0	0	0	0	1	0	0	0	0	0	0	0	0	0	0	0	0	0	0	0	0	0	0	0	0	0	0	0	0	0	0	0	0	0	0	0	0	0	1	na	na	na	na
huge_phage_3334_curated_complete_49	190	0	0	0	0	1	0	0	0	0	0	0	0	0	0	0	0	0	0	0	0	0	0	0	0	0	0	0	0	0	0	0	0	0	0	0	0	0	0	1	HNH nuclease domain-containing protein	DNA binding and cleavage by the HNH homing endonuclease I-HmuI	na	na
huge_phage_3334_curated_complete_50	123	0	0	0	0	1	0	0	0	0	0	0	0	0	0	0	0	0	0	0	0	0	0	0	0	0	0	0	0	0	0	0	0	0	0	0	0	0	0	1	Uncharacterized protein	Structure of a human p110alpha/p85alpha complex	exodeoxyribonuclease VII small subunit	na
huge_phage_3334_curated_complete_51	54	0	0	0	0	1	0	0	0	0	0	0	0	0	0	0	0	0	0	0	0	0	0	0	0	0	0	0	0	0	0	0	0	0	0	0	0	0	0	1	na	na	na	na
huge_phage_3334_curated_complete_52	45	0	0	0	0	1	0	0	0	0	0	0	0	0	0	0	0	0	0	0	0	0	0	0	0	0	0	0	0	0	0	0	0	0	0	0	0	0	0	1	Uncharacterized protein	Dimerization domain of TP901-1 CI repressor	na	na
huge_phage_3334_curated_complete_53	87	0	0	0	0	1	0	0	0	0	0	0	0	0	0	0	0	0	0	0	0	0	0	0	0	0	0	0	0	0	0	0	0	0	0	0	0	0	0	1	Helix-turn-helix domain protein	na	na	na
huge_phage_3334_curated_complete_54	78	0	0	0	0	1	0	0	0	0	0	0	0	0	0	0	0	0	0	0	0	0	0	0	0	0	0	0	0	0	0	0	0	0	0	0	0	0	0	1	Uncharacterized protein	na	na	na
huge_phage_3334_curated_complete_55	126	0	0	0	0	1	0	0	0	0	0	0	0	0	0	0	0	0	0	0	0	0	0	0	0	0	0	0	0	0	0	0	0	0	0	0	0	0	0	1	Uncharacterized protein	na	na	na
huge_phage_3334_curated_complete_56	84	0	0	0	0	1	0	0	0	0	0	0	0	0	0	0	0	0	0	0	0	0	0	0	0	0	0	0	0	0	0	0	0	0	0	0	0	0	0	1	Uncharacterized protein	Structure of yeast F1-ATPase determined with 100 micromolar cruentaren A	encapsulin-associated ferritin-like protein	na
huge_phage_3334_curated_complete_57	79	0	0	0	0	1	0	0	0	0	0	0	0	0	0	0	0	0	0	0	0	0	0	0	0	0	0	0	0	0	0	0	0	0	0	0	0	0	0	1	Glycosyltransferase	na	na	na
huge_phage_3334_curated_complete_58	53	0	0	0	0	1	0	0	0	0	0	0	0	0	0	0	0	0	0	0	0	0	0	0	0	0	0	0	0	0	0	0	0	0	0	0	0	0	0	1	Uncharacterized protein	na	hypothetical protein	na
huge_phage_3334_curated_complete_59	122	0	0	0	0	1	0	0	0	0	0	0	0	0	0	0	0	0	0	0	0	0	0	0	0	0	0	0	0	0	0	0	0	0	0	0	0	0	0	1	na	na	na	na
huge_phage_3334_curated_complete_60	88	0	0	0	0	1	0	0	0	0	0	0	0	0	0	0	0	0	0	0	0	0	0	0	0	0	0	0	0	0	0	0	0	0	0	0	0	0	0	1	Nonstructural protein	Structural insights into RISC assembly facilitated by dsRNA binding domains of human RNA helicase (DHX9)	ribosome hibernation-promoting factor, HPF/YfiA family	na
huge_phage_3334_curated_complete_61	168	0	0	0	0	1	0	0	0	0	0	0	0	0	0	0	0	0	0	0	0	0	0	0	0	0	0	0	0	0	0	0	0	0	0	0	0	0	0	1	Helix-turn-helix domain protein	SINR PROTEIN/SINI PROTEIN COMPLEX	RstR family transcriptional repressor	na
huge_phage_3334_curated_complete_62	36	0	0	0	0	1	0	0	0	0	0	0	0	0	0	0	0	0	0	0	0	0	0	0	0	0	0	0	0	0	0	0	0	0	0	0	0	0	0	1	na	na	na	na
huge_phage_3334_curated_complete_63	67	0	0	0	0	1	0	0	0	0	0	0	0	0	0	0	0	0	0	0	0	0	0	0	0	0	0	0	0	0	0	0	0	0	0	0	0	0	0	1	HTH cro/C1-type domain-containing protein	Regulation of Cytolysin Expression by Enterococcus faecalis: Role of CylR2	RstR family transcriptional repressor	na
huge_phage_3334_curated_complete_64	469	0	0	0	0	1	0	0	0	0	0	0	0	0	0	0	0	0	0	0	0	0	0	0	0	0	0	0	0	0	0	0	0	0	0	0	0	0	0	1	Integrase	Crystal Structure of a LSR-DNA Complex	na	na
huge_phage_3334_curated_complete_7	201	0	0	0	0	1	0	0	0	0	0	0	0	0	0	0	0	0	0	0	0	0	0	0	0	0	0	0	0	0	0	0	0	0	0	0	0	0	0	1	na	na	na	na
huge_phage_3334_curated_complete_8	161	0	0	0	0	1	0	0	0	0	0	0	0	0	0	0	0	0	0	0	0	0	0	0	0	0	0	0	0	0	0	0	0	0	0	0	0	0	0	1	Holin	na	toxin secretion/phage lysis holin	na
huge_phage_3334_curated_complete_9	279	0	0	0	0	1	0	0	0	0	0	0	0	0	0	0	0	0	0	0	0	0	0	0	0	0	0	0	0	0	0	0	0	0	0	0	0	0	0	1	lysozyme (EC 3.2.1.17)	Crystal structure of the Clostridium perfringens spore cortex lytic enzyme SleM	na	na
huge_phage_3584_curated_final_1	34	0	0	0	0	0	0	0	0	0	0	0	0	0	0	0	0	0	0	0	0	0	0	1	0	0	0	0	0	0	0	0	0	0	0	0	0	0	0	1	Prolyl 4-Hydroxylase alpha-subunit, N-terminal region	RCII/PSI complex, class 3	na	na
huge_phage_3584_curated_final_44	174	0	0	0	0	0	0	0	0	0	0	0	0	0	0	0	0	0	0	0	0	0	0	1	0	0	0	0	0	0	0	0	0	0	0	0	0	0	0	1	na	na	na	na
huge_phage_3742_curated_complete_1	22	0	0	0	0	0	0	0	0	0	0	0	0	0	0	0	0	0	0	0	0	0	0	0	1	0	0	0	0	0	0	0	0	0	0	0	0	0	0	1	na	na	na	na
huge_phage_3742_curated_complete_176	168	0	0	0	0	0	0	0	0	0	0	0	0	0	0	0	0	0	0	0	0	0	0	0	1	0	0	0	0	0	0	0	0	0	0	0	0	0	0	1	na	na	na	na
huge_phage_3742_curated_complete_94	273	0	0	0	0	0	0	0	0	0	0	0	0	0	0	0	0	0	0	0	0	0	0	0	1	0	0	0	0	0	0	0	0	0	0	0	0	0	0	1	Uncharacterized protein	na	na	na
huge_phage_4378_curated_complete_1	83	0	0	0	0	0	0	0	0	0	0	0	0	0	0	0	0	0	0	0	0	0	0	0	0	1	0	0	0	0	0	0	0	0	0	0	0	0	0	1	na	na	na	na
huge_phage_4378_curated_complete_332	186	0	0	0	0	0	0	0	0	0	0	0	0	0	0	0	0	0	0	0	0	0	0	0	0	1	0	0	0	0	0	0	0	0	0	0	0	0	0	1	na	na	na	na
huge_phage_4378_curated_complete_333	244	0	0	0	0	0	0	0	0	0	0	0	0	0	0	0	0	0	0	0	0	0	0	0	0	1	0	0	0	0	0	0	0	0	0	0	0	0	0	1	na	na	na	na
huge_phage_4378_curated_complete_348	140	0	0	0	0	0	0	0	0	0	0	0	0	0	0	0	0	0	0	0	0	0	0	0	0	1	0	0	0	0	0	0	0	0	0	0	0	0	0	1	na	na	na	na
huge_phage_4378_curated_complete_52	155	0	0	0	0	0	0	0	0	0	0	0	0	0	0	0	0	0	0	0	0	0	0	0	0	1	0	0	0	0	0	0	0	0	0	0	0	0	0	1	Hypervirulence associated protein TUDOR domain-containing protein	na	na	na
huge_phage_4380_curated_final_156	67	0	0	0	0	0	0	0	0	0	0	0	0	0	0	0	0	0	0	0	0	0	0	0	0	0	1	0	0	0	0	0	0	0	0	0	0	0	0	1	na	na	na	na
huge_phage_4380_curated_final_157	514	0	0	0	0	0	0	0	0	0	0	0	0	0	0	0	0	0	0	0	0	0	0	0	0	0	1	0	0	0	0	0	0	0	0	0	0	0	0	1	Transposase	Cryo-EM structure of the AsCas12f-HKRA-sgRNAS3-5v7-target DNA	RNA-guided DNA endonuclease domain-containing protein	na
huge_phage_4380_curated_final_158	122	0	0	0	0	0	0	0	0	0	0	0	0	0	0	0	0	0	0	0	0	0	0	0	0	0	1	0	0	0	0	0	0	0	0	0	0	0	0	1	na	na	na	na
huge_phage_4380_curated_final_175	118	0	0	0	0	0	0	0	0	0	0	0	0	0	0	0	0	0	0	0	0	0	0	0	0	0	1	0	0	0	0	0	0	0	0	0	0	0	0	1	Uncharacterized protein	na	na	na
huge_phage_4380_curated_final_178	132	0	0	0	0	0	0	0	0	0	0	0	0	0	0	0	0	0	0	0	0	0	0	0	0	0	1	0	0	0	0	0	0	0	0	0	0	0	0	1	na	na	na	na
huge_phage_4380_curated_final_263	86	0	0	0	0	0	0	0	0	0	0	0	0	0	0	0	0	0	0	0	0	0	0	0	0	0	1	0	0	0	0	0	0	0	0	0	0	0	0	1	na	na	na	na
huge_phage_4380_curated_final_270	264	0	0	0	0	0	0	0	0	0	0	0	0	0	0	0	0	0	0	0	0	0	0	0	0	0	1	0	0	0	0	0	0	0	0	0	0	0	0	1	na	na	na	na
huge_phage_4380_curated_final_272	116	0	0	0	0	0	0	0	0	0	0	0	0	0	0	0	0	0	0	0	0	0	0	0	0	0	1	0	0	0	0	0	0	0	0	0	0	0	0	1	na	na	na	na
huge_phage_4380_curated_final_98	188	0	0	0	0	0	0	0	0	0	0	0	0	0	0	0	0	0	0	0	0	0	0	0	0	0	1	0	0	0	0	0	0	0	0	0	0	0	0	1	na	na	na	na
huge_phage_4380_curated_final_99	197	0	0	0	0	0	0	0	0	0	0	0	0	0	0	0	0	0	0	0	0	0	0	0	0	0	1	0	0	0	0	0	0	0	0	0	0	0	0	1	Uncharacterized protein	na	na	na
huge_phage_4400_curated_complete_1	137	0	0	0	0	0	0	0	0	0	0	0	0	0	0	0	0	0	0	0	0	0	0	0	0	0	0	1	0	0	0	0	0	0	0	0	0	0	0	1	na	na	na	na
huge_phage_4400_curated_complete_286	144	0	0	0	0	0	0	0	0	0	0	0	0	0	0	0	0	0	0	0	0	0	0	0	0	0	0	1	0	0	0	0	0	0	0	0	0	0	0	1	na	na	na	na
huge_phage_4400_curated_complete_3	122	0	0	0	0	0	0	0	0	0	0	0	0	0	0	0	0	0	0	0	0	0	0	0	0	0	0	1	0	0	0	0	0	0	0	0	0	0	0	1	na	na	na	na
huge_phage_4400_curated_complete_342	394	0	0	0	0	0	0	0	0	0	0	0	0	0	0	0	0	0	0	0	0	0	0	0	0	0	0	1	0	0	0	0	0	0	0	0	0	0	0	1	na	na	na	na
huge_phage_4614_curated_complete_130	124	0	0	0	0	0	1	0	0	0	0	0	0	0	0	0	0	0	0	0	0	0	0	0	0	0	0	0	0	0	0	0	0	0	0	0	0	0	0	1	na	na	na	na
huge_phage_4614_curated_complete_131	95	0	0	0	0	0	1	0	0	0	0	0	0	0	0	0	0	0	0	0	0	0	0	0	0	0	0	0	0	0	0	0	0	0	0	0	0	0	0	1	na	na	na	na
huge_phage_4614_curated_complete_201	69	0	0	0	0	0	1	0	0	0	0	0	0	0	0	0	0	0	0	0	0	0	0	0	0	0	0	0	0	0	0	0	0	0	0	0	0	0	0	1	Uncharacterized protein	Structure of the Chlamydia pneumoniae CdsV and CdsO protein complex	Lmo0654 family protein	na
huge_phage_4614_curated_complete_202	222	0	0	0	0	0	1	0	0	0	0	0	0	0	0	0	0	0	0	0	0	0	0	0	0	0	0	0	0	0	0	0	0	0	0	0	0	0	0	1	4Fe-4S single cluster domain protein	Structural Insights into Thioether Bond Formation in the Biosynthesis of Sactipeptides	viperin family antiviral radical SAM protein	na
huge_phage_4614_curated_complete_342	268	0	0	0	0	0	1	0	0	0	0	0	0	0	0	0	0	0	0	0	0	0	0	0	0	0	0	0	0	0	0	0	0	0	0	0	0	0	0	1	na	na	na	na
huge_phage_4614_curated_complete_343	59	0	0	0	0	0	1	0	0	0	0	0	0	0	0	0	0	0	0	0	0	0	0	0	0	0	0	0	0	0	0	0	0	0	0	0	0	0	0	1	Rhomboid N-terminal domain	NMR structure of the computationally designed procarboxypeptidase-A (1AYE) domain	ACT domain-containing protein	na
huge_phage_4614_curated_complete_96	81	0	0	0	0	0	1	0	0	0	0	0	0	0	0	0	0	0	0	0	0	0	0	0	0	0	0	0	0	0	0	0	0	0	0	0	0	0	0	1	na	na	na	na
huge_phage_4614_curated_complete_98	120	0	0	0	0	0	1	0	0	0	0	0	0	0	0	0	0	0	0	0	0	0	0	0	0	0	0	0	0	0	0	0	0	0	0	0	0	0	0	1	na	na	na	na
huge_phage_5020_curated_complete_121	1427	0	0	0	0	0	0	1	0	0	0	0	0	0	0	0	0	0	0	0	0	0	0	0	0	0	0	0	0	0	0	0	0	0	0	0	0	0	0	1	na	na	na	na
huge_phage_5020_curated_complete_122	146	0	0	0	0	0	0	1	0	0	0	0	0	0	0	0	0	0	0	0	0	0	0	0	0	0	0	0	0	0	0	0	0	0	0	0	0	0	0	1	na	na	na	na
huge_phage_5020_curated_complete_123	153	0	0	0	0	0	0	1	0	0	0	0	0	0	0	0	0	0	0	0	0	0	0	0	0	0	0	0	0	0	0	0	0	0	0	0	0	0	0	1	na	na	cable pilus major pilin CblA	na
huge_phage_5020_curated_complete_124	264	0	0	0	0	0	0	1	0	0	0	0	0	0	0	0	0	0	0	0	0	0	0	0	0	0	0	0	0	0	0	0	0	0	0	0	0	0	0	1	na	na	na	na
huge_phage_5020_curated_complete_14	91	0	0	0	0	0	0	1	0	0	0	0	0	0	0	0	0	0	0	0	0	0	0	0	0	0	0	0	0	0	0	0	0	0	0	0	0	0	0	1	Uncharacterized protein	Solution NMR Structure of Denovo Beta Sheet Design Protein, Northeast Structural Genomics Consortium (NESG) Target OR485	na	na
huge_phage_5020_curated_complete_164	67	0	0	0	0	0	0	1	0	0	0	0	0	0	0	0	0	0	0	0	0	0	0	0	0	0	0	0	0	0	0	0	0	0	0	0	0	0	0	1	Uncharacterized protein	na	na	na
huge_phage_5020_curated_complete_193	80	0	0	0	0	0	0	1	0	0	0	0	0	0	0	0	0	0	0	0	0	0	0	0	0	0	0	0	0	0	0	0	0	0	0	0	0	0	0	1	Uncharacterized protein	na	na	na
huge_phage_5020_curated_complete_194	71	0	0	0	0	0	0	1	0	0	0	0	0	0	0	0	0	0	0	0	0	0	0	0	0	0	0	0	0	0	0	0	0	0	0	0	0	0	0	1	na	na	na	na
huge_phage_5020_curated_complete_196	442	0	0	0	0	0	0	1	0	0	0	0	0	0	0	0	0	0	0	0	0	0	0	0	0	0	0	0	0	0	0	0	0	0	0	0	0	0	0	1	na	na	na	na
huge_phage_5020_curated_complete_200	341	0	0	0	0	0	0	1	0	0	0	0	0	0	0	0	0	0	0	0	0	0	0	0	0	0	0	0	0	0	0	0	0	0	0	0	0	0	0	1	na	na	na	na
huge_phage_5020_curated_complete_212	276	0	0	0	0	0	0	1	0	0	0	0	0	0	0	0	0	0	0	0	0	0	0	0	0	0	0	0	0	0	0	0	0	0	0	0	0	0	0	1	na	na	Rpn family recombination-promoting nuclease/putative transposase	na
huge_phage_5020_curated_complete_24	79	0	0	0	0	0	0	1	0	0	0	0	0	0	0	0	0	0	0	0	0	0	0	0	0	0	0	0	0	0	0	0	0	0	0	0	0	0	0	1	na	na	na	na
huge_phage_5020_curated_complete_25	62	0	0	0	0	0	0	1	0	0	0	0	0	0	0	0	0	0	0	0	0	0	0	0	0	0	0	0	0	0	0	0	0	0	0	0	0	0	0	1	na	na	na	na
huge_phage_5020_curated_complete_252	203	0	0	0	0	0	0	1	0	0	0	0	0	0	0	0	0	0	0	0	0	0	0	0	0	0	0	0	0	0	0	0	0	0	0	0	0	0	0	1	na	na	na	na
huge_phage_5020_curated_complete_253	109	0	0	0	0	0	0	1	0	0	0	0	0	0	0	0	0	0	0	0	0	0	0	0	0	0	0	0	0	0	0	0	0	0	0	0	0	0	0	1	na	na	na	na
huge_phage_5020_curated_complete_254	189	0	0	0	0	0	0	1	0	0	0	0	0	0	0	0	0	0	0	0	0	0	0	0	0	0	0	0	0	0	0	0	0	0	0	0	0	0	0	1	na	na	na	na
huge_phage_5020_curated_complete_278	56	0	0	0	0	0	0	1	0	0	0	0	0	0	0	0	0	0	0	0	0	0	0	0	0	0	0	0	0	0	0	0	0	0	0	0	0	0	0	1	Uncharacterized protein	na	na	na
huge_phage_5020_curated_complete_28	81	0	0	0	0	0	0	1	0	0	0	0	0	0	0	0	0	0	0	0	0	0	0	0	0	0	0	0	0	0	0	0	0	0	0	0	0	0	0	1	Antitoxin	Crystal structure of PHD truncated to residue 57 in an orthorhombic space group	type II toxin-antitoxin system prevent-host-death family antitoxin	na
huge_phage_5020_curated_complete_284	39	0	0	0	0	0	0	1	0	0	0	0	0	0	0	0	0	0	0	0	0	0	0	0	0	0	0	0	0	0	0	0	0	0	0	0	0	0	0	1	na	na	na	na
huge_phage_5020_curated_complete_288	178	0	0	0	0	0	0	1	0	0	0	0	0	0	0	0	0	0	0	0	0	0	0	0	0	0	0	0	0	0	0	0	0	0	0	0	0	0	0	1	na	na	na	na
huge_phage_5020_curated_complete_29	136	0	0	0	0	0	0	1	0	0	0	0	0	0	0	0	0	0	0	0	0	0	0	0	0	0	0	0	0	0	0	0	0	0	0	0	0	0	0	1	DUF1308 domain-containing protein	VapBC from Mycobacterium tuberculosis	tRNA(fMet)-specific endonuclease VapC	na
huge_phage_5020_curated_complete_308	55	0	0	0	0	0	0	1	0	0	0	0	0	0	0	0	0	0	0	0	0	0	0	0	0	0	0	0	0	0	0	0	0	0	0	0	0	0	0	1	Uncharacterized protein	17_bp_sh3, a small beta-barrel de novo designed protein	YgdI/YgdR family lipoprotein	na
huge_phage_5020_curated_complete_329	140	0	0	0	0	0	0	1	0	0	0	0	0	0	0	0	0	0	0	0	0	0	0	0	0	0	0	0	0	0	0	0	0	0	0	0	0	0	0	1	Uncharacterized protein	na	na	na
huge_phage_5020_curated_complete_339	92	0	0	0	0	0	0	1	0	0	0	0	0	0	0	0	0	0	0	0	0	0	0	0	0	0	0	0	0	0	0	0	0	0	0	0	0	0	0	1	Uncharacterized protein	DNA-binding domain of DeoR in complex with the DNA operator	transposase, putative, N-terminal domain	na
huge_phage_5020_curated_complete_347	57	0	0	0	0	0	0	1	0	0	0	0	0	0	0	0	0	0	0	0	0	0	0	0	0	0	0	0	0	0	0	0	0	0	0	0	0	0	0	1	na	na	na	na
huge_phage_5020_curated_complete_348	302	0	0	0	0	0	0	1	0	0	0	0	0	0	0	0	0	0	0	0	0	0	0	0	0	0	0	0	0	0	0	0	0	0	0	0	0	0	0	1	na	na	na	na
huge_phage_5020_curated_complete_349	110	0	0	0	0	0	0	1	0	0	0	0	0	0	0	0	0	0	0	0	0	0	0	0	0	0	0	0	0	0	0	0	0	0	0	0	0	0	0	1	na	na	na	na
huge_phage_5020_curated_complete_350	213	0	0	0	0	0	0	1	0	0	0	0	0	0	0	0	0	0	0	0	0	0	0	0	0	0	0	0	0	0	0	0	0	0	0	0	0	0	0	1	na	na	na	na
huge_phage_5020_curated_complete_351	252	0	0	0	0	0	0	1	0	0	0	0	0	0	0	0	0	0	0	0	0	0	0	0	0	0	0	0	0	0	0	0	0	0	0	0	0	0	0	1	na	Structural basis for the interaction of Pyk2 PAT domain with paxillin LD motifs	na	na
huge_phage_5020_curated_complete_352	46	0	0	0	0	0	0	1	0	0	0	0	0	0	0	0	0	0	0	0	0	0	0	0	0	0	0	0	0	0	0	0	0	0	0	0	0	0	0	1	na	na	na	na
huge_phage_5020_curated_complete_353	355	0	0	0	0	0	0	1	0	0	0	0	0	0	0	0	0	0	0	0	0	0	0	0	0	0	0	0	0	0	0	0	0	0	0	0	0	0	0	1	Type I restriction modification DNA specificity domain-containing protein	Crystal structure of Type-I restriction-modification system S subunit from M. genitalium	na	na
huge_phage_5020_curated_complete_391	35	0	0	0	0	0	0	1	0	0	0	0	0	0	0	0	0	0	0	0	0	0	0	0	0	0	0	0	0	0	0	0	0	0	0	0	0	0	0	1	na	na	na	na
huge_phage_5020_curated_complete_98	69	0	0	0	0	0	0	1	0	0	0	0	0	0	0	0	0	0	0	0	0	0	0	0	0	0	0	0	0	0	0	0	0	0	0	0	0	0	0	1	na	na	na	na
huge_phage_5175_43	260	0	0	0	0	0	0	0	1	0	0	0	0	0	0	0	0	0	0	0	0	0	0	0	0	0	0	0	0	0	0	0	0	0	0	0	0	0	0	1	na	na	na	na
huge_phage_7428_curated_complete_118	143	0	0	0	0	0	0	0	0	1	0	0	0	0	0	0	0	0	0	0	0	0	0	0	0	0	0	0	0	0	0	0	0	0	0	0	0	0	0	1	na	na	na	na
huge_phage_7428_curated_complete_213	32	0	0	0	0	0	0	0	0	1	0	0	0	0	0	0	0	0	0	0	0	0	0	0	0	0	0	0	0	0	0	0	0	0	0	0	0	0	0	1	na	na	na	na
huge_phage_7795_21	143	0	0	0	0	0	0	0	0	0	1	0	0	0	0	0	0	0	0	0	0	0	0	0	0	0	0	0	0	0	0	0	0	0	0	0	0	0	0	1	na	na	na	na
huge_phage_7795_221	74	0	0	0	0	0	0	0	0	0	1	0	0	0	0	0	0	0	0	0	0	0	0	0	0	0	0	0	0	0	0	0	0	0	0	0	0	0	0	1	na	na	na	na
huge_phage_7795_363	452	0	0	0	0	0	0	0	0	0	1	0	0	0	0	0	0	0	0	0	0	0	0	0	0	0	0	0	0	0	0	0	0	0	0	0	0	0	0	1	Restriction endonuclease	na	na	na
huge_phage_7795_364	145	0	0	0	0	0	0	0	0	0	1	0	0	0	0	0	0	0	0	0	0	0	0	0	0	0	0	0	0	0	0	0	0	0	0	0	0	0	0	1	na	na	na	na
huge_phage_7795_370	440	0	0	0	0	0	0	0	0	0	1	0	0	0	0	0	0	0	0	0	0	0	0	0	0	0	0	0	0	0	0	0	0	0	0	0	0	0	0	1	Transposase	Cryo-EM structure of the AsCas12f-HKRA-sgRNAS3-5v7-target DNA	RNA-guided DNA endonuclease domain-containing protein	na
huge_phage_7795_39	84	0	0	0	0	0	0	0	0	0	1	0	0	0	0	0	0	0	0	0	0	0	0	0	0	0	0	0	0	0	0	0	0	0	0	0	0	0	0	1	Uncharacterized protein	na	na	na
huge_phage_7795_46	70	0	0	0	0	0	0	0	0	0	1	0	0	0	0	0	0	0	0	0	0	0	0	0	0	0	0	0	0	0	0	0	0	0	0	0	0	0	0	1	na	na	na	na
huge_phage_8498_curated_complete_1	538	0	0	0	0	0	0	0	0	0	0	0	0	0	0	0	0	0	0	0	0	0	0	0	0	0	0	0	1	0	0	0	0	0	0	0	0	0	0	1	na	Crystal structure of TnsC(1-503)A225V	na	na
huge_phage_8498_curated_complete_10	1101	0	0	0	0	0	0	0	0	0	0	0	0	0	0	0	0	0	0	0	0	0	0	0	0	0	0	0	1	0	0	0	0	0	0	0	0	0	0	1	na	na	na	na
huge_phage_8498_curated_complete_11	343	0	0	0	0	0	0	0	0	0	0	0	0	0	0	0	0	0	0	0	0	0	0	0	0	0	0	0	1	0	0	0	0	0	0	0	0	0	0	1	Restriction-modification methylase	na	na	na
huge_phage_8498_curated_complete_12	321	0	0	0	0	0	0	0	0	0	0	0	0	0	0	0	0	0	0	0	0	0	0	0	0	0	0	0	1	0	0	0	0	0	0	0	0	0	0	1	N-6 DNA Methylase	na	na	na
huge_phage_8498_curated_complete_13	297	0	0	0	0	0	0	0	0	0	0	0	0	0	0	0	0	0	0	0	0	0	0	0	0	0	0	0	1	0	0	0	0	0	0	0	0	0	0	1	Fic family protein	Clostridium difficile Fic protein_0569 mutant S31A, E35A in complex with ATP	mobile mystery protein B	na
huge_phage_8498_curated_complete_136	225	0	0	0	0	0	0	0	0	0	0	0	0	0	0	0	0	0	0	0	0	0	0	0	0	0	0	0	1	0	0	0	0	0	0	0	0	0	0	1	na	na	na	na
huge_phage_8498_curated_complete_137	33	0	0	0	0	0	0	0	0	0	0	0	0	0	0	0	0	0	0	0	0	0	0	0	0	0	0	0	1	0	0	0	0	0	0	0	0	0	0	1	Uncharacterized protein	Consensus engineered intein (Cat) with atypical split site	na	na
huge_phage_8498_curated_complete_14	447	0	0	0	0	0	0	0	0	0	0	0	0	0	0	0	0	0	0	0	0	0	0	0	0	0	0	0	1	0	0	0	0	0	0	0	0	0	0	1	na	na	na	na
huge_phage_8498_curated_complete_15	61	0	0	0	0	0	0	0	0	0	0	0	0	0	0	0	0	0	0	0	0	0	0	0	0	0	0	0	1	0	0	0	0	0	0	0	0	0	0	1	Uncharacterized protein	na	na	na
huge_phage_8498_curated_complete_16	276	0	0	0	0	0	0	0	0	0	0	0	0	0	0	0	0	0	0	0	0	0	0	0	0	0	0	0	1	0	0	0	0	0	0	0	0	0	0	1	na	na	na	na
huge_phage_8498_curated_complete_171	34	0	0	0	0	0	0	0	0	0	0	0	0	0	0	0	0	0	0	0	0	0	0	0	0	0	0	0	1	0	0	0	0	0	0	0	0	0	0	1	Uncharacterized protein	na	na	na
huge_phage_8498_curated_complete_183	76	0	0	0	0	0	0	0	0	0	0	0	0	0	0	0	0	0	0	0	0	0	0	0	0	0	0	0	1	0	0	0	0	0	0	0	0	0	0	1	Uncharacterized protein	crystal structure of Arabidopsis RDM15 tudor domain in complex with an H3K4me1 peptide	dual CXXC motif small (seleno)protein	na
huge_phage_8498_curated_complete_2	704	0	0	0	0	0	0	0	0	0	0	0	0	0	0	0	0	0	0	0	0	0	0	0	0	0	0	0	1	0	0	0	0	0	0	0	0	0	0	1	na	Strand-transfer complex of TnsB from ShCAST	na	na
huge_phage_8498_curated_complete_3	226	0	0	0	0	0	0	0	0	0	0	0	0	0	0	0	0	0	0	0	0	0	0	0	0	0	0	0	1	0	0	0	0	0	0	0	0	0	0	1	Endonuclease	Crystal Structure of the TnsA/TnsC(504-555) complex	TnsA-like heteromeric transposase endonuclease subunit	na
huge_phage_8498_curated_complete_4	739	0	0	0	0	0	0	0	0	0	0	0	0	0	0	0	0	0	0	0	0	0	0	0	0	0	0	0	1	0	0	0	0	0	0	0	0	0	0	1	na	na	na	na
huge_phage_8498_curated_complete_5	392	0	0	0	0	0	0	0	0	0	0	0	0	0	0	0	0	0	0	0	0	0	0	0	0	0	0	0	1	0	0	0	0	0	0	0	0	0	0	1	na	na	na	na
huge_phage_8498_curated_complete_6	66	0	0	0	0	0	0	0	0	0	0	0	0	0	0	0	0	0	0	0	0	0	0	0	0	0	0	0	1	0	0	0	0	0	0	0	0	0	0	1	na	Crystal structure of oxygen-evolving photosystem II from a red alga	exodeoxyribonuclease VII small subunit	na
huge_phage_8498_curated_complete_7	66	0	0	0	0	0	0	0	0	0	0	0	0	0	0	0	0	0	0	0	0	0	0	0	0	0	0	0	1	0	0	0	0	0	0	0	0	0	0	1	Uncharacterized protein	na	K(+)-transporting ATPase subunit F	na
huge_phage_8498_curated_complete_8	75	0	0	0	0	0	0	0	0	0	0	0	0	0	0	0	0	0	0	0	0	0	0	0	0	0	0	0	1	0	0	0	0	0	0	0	0	0	0	1	na	na	na	na
huge_phage_8498_curated_complete_9	455	0	0	0	0	0	0	0	0	0	0	0	0	0	0	0	0	0	0	0	0	0	0	0	0	0	0	0	1	0	0	0	0	0	0	0	0	0	0	1	na	na	na	na
huge_phage_8550_curated_final_108	86	0	0	0	0	0	0	0	0	0	0	0	0	0	0	0	0	0	0	0	0	0	0	0	0	0	0	0	0	1	0	0	0	0	0	0	0	0	0	1	na	na	na	na
huge_phage_8550_curated_final_109	305	0	0	0	0	0	0	0	0	0	0	0	0	0	0	0	0	0	0	0	0	0	0	0	0	0	0	0	0	1	0	0	0	0	0	0	0	0	0	1	na	na	na	na
huge_phage_8550_curated_final_232	171	0	0	0	0	0	0	0	0	0	0	0	0	0	0	0	0	0	0	0	0	0	0	0	0	0	0	0	0	1	0	0	0	0	0	0	0	0	0	1	Minor capsid protein	Crystal structure of acetyltransferase GNAT family (YP_013287.1) from Listeria monocytogenes 4b F2365 at 1.46 A resolution	amino-acid N-acetyltransferase	na
huge_phage_8550_curated_final_29	249	0	0	0	0	0	0	0	0	0	0	0	0	0	0	0	0	0	0	0	0	0	0	0	0	0	0	0	0	1	0	0	0	0	0	0	0	0	0	1	na	na	na	na
huge_phage_8550_curated_final_91	111	0	0	0	0	0	0	0	0	0	0	0	0	0	0	0	0	0	0	0	0	0	0	0	0	0	0	0	0	1	0	0	0	0	0	0	0	0	0	1	na	na	na	na
huge_phage_8811_curated_complete_295	75	0	0	0	0	0	0	0	0	0	0	1	0	0	0	0	0	0	0	0	0	0	0	0	0	0	0	0	0	0	0	0	0	0	0	0	0	0	0	1	na	na	na	na
NZ_DXPE01000001_curated_complete_1	106	0	0	0	0	0	0	0	0	0	0	0	0	0	0	0	0	0	0	0	0	0	0	0	0	0	0	0	0	0	1	0	0	0	0	0	0	0	0	1	na	na	na	na
NZ_DXPE01000001_curated_complete_244	147	0	0	0	0	0	0	0	0	0	0	0	0	0	0	0	0	0	0	0	0	0	0	0	0	0	0	0	0	0	1	0	0	0	0	0	0	0	0	1	na	na	na	na
NZ_DXPE01000001_curated_complete_245	98	0	0	0	0	0	0	0	0	0	0	0	0	0	0	0	0	0	0	0	0	0	0	0	0	0	0	0	0	0	1	0	0	0	0	0	0	0	0	1	na	na	na	na
SRR13207761_NODE_54_curated_final_131	165	0	0	0	0	0	0	0	0	0	0	0	0	0	0	0	0	0	0	0	0	0	0	0	0	0	0	0	0	0	0	0	1	0	0	0	0	0	0	1	PIN domain-containing protein	Structure of the Shigella flexneri VapC mutant D7A	hypothetical protein	na
SRR13207761_NODE_54_curated_final_132	344	0	0	0	0	0	0	0	0	0	0	0	0	0	0	0	0	0	0	0	0	0	0	0	0	0	0	0	0	0	0	0	1	0	0	0	0	0	0	1	na	na	na	na
SRR13207761_NODE_54_curated_final_302	193	0	0	0	0	0	0	0	0	0	0	0	0	0	0	0	0	0	0	0	0	0	0	0	0	0	0	0	0	0	0	0	1	0	0	0	0	0	0	1	na	na	na	na
SRR13207761_NODE_54_curated_final_43	99	0	0	0	0	0	0	0	0	0	0	0	0	0	0	0	0	0	0	0	0	0	0	0	0	0	0	0	0	0	0	0	1	0	0	0	0	0	0	1	na	na	na	na
SRR18461266_NODE_121_curated_complete_220	58	0	0	0	0	0	0	0	0	0	0	0	0	0	0	0	0	0	0	0	0	0	0	0	0	0	0	0	0	0	0	0	0	1	0	0	0	0	0	1	na	na	na	na
SRR18461266_NODE_121_curated_complete_222	55	0	0	0	0	0	0	0	0	0	0	0	0	0	0	0	0	0	0	0	0	0	0	0	0	0	0	0	0	0	0	0	0	1	0	0	0	0	0	1	na	na	na	na
SRR21858778_NODE_12_curated_final_146	145	0	0	0	0	0	0	0	0	0	0	0	0	0	0	0	0	0	0	0	0	0	0	0	0	0	0	0	0	0	0	0	0	0	1	0	0	0	0	1	na	na	na	na
SRR21858778_NODE_12_curated_final_23	90	0	0	0	0	0	0	0	0	0	0	0	0	0	0	0	0	0	0	0	0	0	0	0	0	0	0	0	0	0	0	0	0	0	1	0	0	0	0	1	na	na	na	na
SRR6451797_NODE_81_curated_circular_217	98	0	0	0	0	0	0	0	0	0	0	0	0	0	0	0	0	0	0	0	0	0	0	0	0	0	0	0	0	0	0	0	0	0	0	1	0	0	0	1	na	na	na	na
SRR6451797_NODE_81_curated_circular_263	145	0	0	0	0	0	0	0	0	0	0	0	0	0	0	0	0	0	0	0	0	0	0	0	0	0	0	0	0	0	0	0	0	0	0	1	0	0	0	1	na	na	na	na
SRR6451797_NODE_81_curated_circular_264	106	0	0	0	0	0	0	0	0	0	0	0	0	0	0	0	0	0	0	0	0	0	0	0	0	0	0	0	0	0	0	0	0	0	0	1	0	0	0	1	Uncharacterized protein	Complex structure of tyrosinated alpha-tubulin carboxy-terminal peptide and A1aY1 binder	na	na
SRR6451797_NODE_81_curated_circular_348	86	0	0	0	0	0	0	0	0	0	0	0	0	0	0	0	0	0	0	0	0	0	0	0	0	0	0	0	0	0	0	0	0	0	0	1	0	0	0	1	na	na	na	na

## Sheet: ST3
Supplementary Table 3 | The protein-coding genes of Hodors with the best homolog hits to those from Bacillota. Note that the prophage genomes have been removed from the curated Hodor genomes before performing this analysis.
Hodor genome	Hodor protein	Hodor protein length (aa)	Hodor protein pfam domains (indp-evalue ≤1e-5)	Taxonomy of Hodor protein most closed gene in UniProtKB
ERR11029134_NODE_10_curated_complete	ERR11029134_NODE_10_curated_complete_2	253	Thy1	p_Bacillota;c_Clostridia;o_Eubacteriales;f_Oscillospiraceae;-_unclassified Oscillospiraceae;s_Oscillospiraceae bacterium
ERR11029134_NODE_10_curated_complete	ERR11029134_NODE_10_curated_complete_3	79	NA	p_Bacillota;c_Clostridia;o_Eubacteriales;f_Clostridiaceae;g_Clostridium;-_environmental samples;s_uncultured Clostridium sp.
ERR11029134_NODE_10_curated_complete	ERR11029134_NODE_10_curated_complete_4	191	NA	p_Bacillota;c_Clostridia;o_Eubacteriales;f_Oscillospiraceae;g_Anaerofilum;-_unclassified Anaerofilum;s_Anaerofilum sp. An201
ERR11029134_NODE_10_curated_complete	ERR11029134_NODE_10_curated_complete_6	250	NA	p_Bacillota;c_Bacilli;o_Bacillales;f_Bacillaceae;g_Bacillus;-_Bacillus subtilis group;s_Bacillus licheniformis;-_Bacillus licheniformis CG-B52
ERR11029134_NODE_10_curated_complete	ERR11029134_NODE_10_curated_complete_9	222	NA	p_Bacillota;c_Clostridia;o_Eubacteriales;f_Butyricicoccaceae;g_Butyricicoccus;-_unclassified Butyricicoccus;s_Butyricicoccus sp. AF22-28AC
ERR11029134_NODE_10_curated_complete	ERR11029134_NODE_10_curated_complete_11	414	YqaJ	p_Bacillota;c_Clostridia;o_Eubacteriales;f_Oscillospiraceae;g_Ruthenibacterium;s_Ruthenibacterium lactatiformans
ERR11029134_NODE_10_curated_complete	ERR11029134_NODE_10_curated_complete_14	766	HHH_4 + AAA_30 + SH3_13 + UvrD_C_2	p_Bacillota;c_Clostridia;o_Eubacteriales;f_Oscillospiraceae;g_Anaerofilum;-_unclassified Anaerofilum;s_Anaerofilum sp. An201
ERR11029134_NODE_10_curated_complete	ERR11029134_NODE_10_curated_complete_16	1336	NA	p_Bacillota;c_Clostridia;o_Eubacteriales;f_Oscillospiraceae;g_Ruthenibacterium;s_Ruthenibacterium lactatiformans
ERR11029134_NODE_10_curated_complete	ERR11029134_NODE_10_curated_complete_19	270	N6_N4_Mtase	p_Bacillota;c_Clostridia;o_Lachnospirales;f_Lachnospiraceae;g_Lachnospira;s_Lachnospira eligens
ERR11029134_NODE_10_curated_complete	ERR11029134_NODE_10_curated_complete_22	79	DUF4379	p_Bacillota;c_Clostridia;o_Lachnospirales;f_Lachnospiraceae;g_Butyrivibrio;s_Butyrivibrio hungatei
ERR11029134_NODE_10_curated_complete	ERR11029134_NODE_10_curated_complete_24	316	EcoRI_methylase	p_Bacillota;c_Clostridia;o_Thermoanaerobacterales;-_unclassified Thermoanaerobacterales;s_Thermoanaerobacterales bacterium
ERR11029134_NODE_10_curated_complete	ERR11029134_NODE_10_curated_complete_26	223	NA	p_Bacillota;c_Clostridia;o_Lachnospirales;f_Lachnospiraceae;g_Agathobacter;s_Agathobacter rectalis
ERR11029134_NODE_10_curated_complete	ERR11029134_NODE_10_curated_complete_28	294	NA	p_Bacillota;-_unclassified Bacillota;s_Firmicutes bacterium CAG:791
ERR11029134_NODE_10_curated_complete	ERR11029134_NODE_10_curated_complete_32	787	T4SS-DNA_transf + TraG-D_C	p_Bacillota;c_Clostridia;o_Eubacteriales;f_Oscillospiraceae;g_Ruthenibacterium;s_Ruthenibacterium lactatiformans
ERR11029134_NODE_10_curated_complete	ERR11029134_NODE_10_curated_complete_33	384	NA	p_Bacillota;c_Clostridia;o_Eubacteriales;f_Oscillospiraceae;g_Anaerofilum;-_unclassified Anaerofilum;s_Anaerofilum sp. An201
ERR11029134_NODE_10_curated_complete	ERR11029134_NODE_10_curated_complete_36	505	NA	p_Bacillota;c_Clostridia;o_Eubacteriales;f_Oscillospiraceae;g_Ruthenibacterium;s_Ruthenibacterium lactatiformans
ERR11029134_NODE_10_curated_complete	ERR11029134_NODE_10_curated_complete_37	855	NA	p_Bacillota;c_Clostridia;o_Eubacteriales;f_Oscillospiraceae;g_Anaerofilum;-_unclassified Anaerofilum;s_Anaerofilum sp. An201
ERR11029134_NODE_10_curated_complete	ERR11029134_NODE_10_curated_complete_40	419	NA	p_Bacillota;c_Clostridia;o_Eubacteriales;f_Oscillospiraceae;g_Ruthenibacterium;s_Ruthenibacterium lactatiformans
ERR11029134_NODE_10_curated_complete	ERR11029134_NODE_10_curated_complete_41	148	bPH_2	p_Bacillota;c_Clostridia;o_Eubacteriales;f_Eubacteriaceae;g_Eubacterium;-_unclassified Eubacterium;s_Eubacterium sp.
ERR11029134_NODE_10_curated_complete	ERR11029134_NODE_10_curated_complete_43	276	Sortase	p_Bacillota;c_Clostridia;o_Eubacteriales;f_Acutalibacteraceae;g_Anaeromassilibacillus;-_unclassified Anaeromassilibacillus;s_Anaeromassilibacillus sp. An172
ERR11029134_NODE_10_curated_complete	ERR11029134_NODE_10_curated_complete_47	124	NA	p_Bacillota;c_Clostridia;o_Eubacteriales;-_Eubacteriales incertae sedis;g_Flintibacter;s_Flintibacter faecis
ERR11029134_NODE_10_curated_complete	ERR11029134_NODE_10_curated_complete_53	565	SBP_bac_11 + VWA	p_Bacillota;c_Clostridia;o_Lachnospirales;f_Lachnospiraceae;-_unclassified Lachnospiraceae;s_Lachnospiraceae bacterium
ERR11029134_NODE_10_curated_complete	ERR11029134_NODE_10_curated_complete_59	722	RE_NgoFVII	p_Bacillota;c_Clostridia;o_Lachnospirales;f_Lachnospiraceae;g_Pseudobutyrivibrio;-_unclassified Pseudobutyrivibrio;s_Pseudobutyrivibrio sp.
ERR11029134_NODE_10_curated_complete	ERR11029134_NODE_10_curated_complete_62	710	NA	p_Bacillota;c_Clostridia;o_Eubacteriales;-_unclassified Eubacteriales;s_Clostridiales bacterium
ERR11029134_NODE_10_curated_complete	ERR11029134_NODE_10_curated_complete_64	191	HTH_3	p_Bacillota;c_Bacilli;o_Lactobacillales;f_Lactobacillaceae;g_Lentilactobacillus;s_Lentilactobacillus otakiensis;-_Lentilactobacillus otakiensis DSM 19908 = JCM 15040
ERR11029134_NODE_10_curated_complete	ERR11029134_NODE_10_curated_complete_69	139	NA	p_Bacillota;c_Clostridia;o_Peptostreptococcales;f_Natronincolaceae;g_Alkaliphilus;-_unclassified Alkaliphilus;s_Alkaliphilus sp. B6464
ERR11029134_NODE_10_curated_complete	ERR11029134_NODE_10_curated_complete_70	112	NA	p_Bacillota;c_Bacilli;o_Bacillales;f_Bacillaceae;g_Sediminibacillus;s_Sediminibacillus halophilus
ERR11029134_NODE_10_curated_complete	ERR11029134_NODE_10_curated_complete_73	219	RloB	p_Bacillota;c_Clostridia;o_Eubacteriales;f_Eubacteriaceae;g_Eubacterium;-_unclassified Eubacterium (in: firmicutes);s_Eubacterium sp. CAG:115
ERR11029134_NODE_10_curated_complete	ERR11029134_NODE_10_curated_complete_74	433	AAA_21	p_Bacillota;c_Clostridia;o_Lachnospirales;f_Lachnospiraceae;g_Roseburia;s_Roseburia inulinivorans
ERR11029134_NODE_10_curated_complete	ERR11029134_NODE_10_curated_complete_78	183	NA	p_Bacillota;c_Clostridia;o_Eubacteriales;f_Oscillospiraceae;g_Subdoligranulum;-_unclassified Subdoligranulum;s_Subdoligranulum sp.
ERR11029134_NODE_10_curated_complete	ERR11029134_NODE_10_curated_complete_80	463	PcfJ	p_Bacillota;c_Bacilli;o_Lactobacillales;f_Aerococcaceae;g_Aerococcus;s_Aerococcus christensenii
ERR11029134_NODE_10_curated_complete	ERR11029134_NODE_10_curated_complete_81	287	NA	p_Bacillota;c_Clostridia;o_Eubacteriales;f_Oscillospiraceae;g_Fumia;s_Fumia xinanensis
ERR11029134_NODE_10_curated_complete	ERR11029134_NODE_10_curated_complete_82	211	NA	p_Bacillota;-_unclassified Bacillota;s_Firmicutes bacterium CAG:124
ERR11029134_NODE_10_curated_complete	ERR11029134_NODE_10_curated_complete_83	421	Big_2 + Big_2	p_Bacillota;c_Tissierellia;-_Tissierellia incertae sedis;g_Ezakiella;s_Ezakiella coagulans
ERR11029134_NODE_10_curated_complete	ERR11029134_NODE_10_curated_complete_87	469	PIN_4 + PhoH	p_Bacillota;c_Clostridia;o_Lachnospirales;f_Lachnospiraceae;g_Kineothrix;s_Kineothrix alysoides
ERR11029134_NODE_10_curated_complete	ERR11029134_NODE_10_curated_complete_91	157	NA	p_Bacillota;c_Clostridia;o_Lachnospirales;f_Lachnospiraceae;g_Anaerocolumna;s_Anaerocolumna xylanovorans;-_Anaerocolumna xylanovorans DSM 12503
ERR11029134_NODE_10_curated_complete	ERR11029134_NODE_10_curated_complete_92	96	NA	p_Bacillota;c_Clostridia;o_Eubacteriales;f_Clostridiaceae;g_Clostridium;-_environmental samples;s_uncultured Clostridium sp.
ERR11029134_NODE_10_curated_complete	ERR11029134_NODE_10_curated_complete_93	390	HipA_C	p_Bacillota;c_Clostridia;o_Eubacteriales;-_Eubacteriales incertae sedis;g_Gemmiger;s_Gemmiger formicilis
ERR11029134_NODE_10_curated_complete	ERR11029134_NODE_10_curated_complete_96	305	DUF2263	p_Bacillota;c_Clostridia;o_Eubacteriales;f_Oscillospiraceae;g_Faecalibacterium;s_Faecalibacterium prausnitzii
ERR11029134_NODE_10_curated_complete	ERR11029134_NODE_10_curated_complete_97	143	NA	p_Bacillota;c_Clostridia;o_Lachnospirales;f_Lachnospiraceae;g_Blautia;-_unclassified Blautia;s_Blautia sp. An249
ERR11029134_NODE_10_curated_complete	ERR11029134_NODE_10_curated_complete_100	188	NA	p_Bacillota;c_Clostridia;o_Eubacteriales;f_Clostridiaceae;g_Clostridium;-_unclassified Clostridium;s_Clostridium sp. CAG:413
ERR11029134_NODE_10_curated_complete	ERR11029134_NODE_10_curated_complete_103	126	NA	p_Bacillota;c_Clostridia;o_Eubacteriales;f_Oscillospiraceae;g_Faecalibacterium;s_Faecalibacterium prausnitzii
ERR11029134_NODE_10_curated_complete	ERR11029134_NODE_10_curated_complete_106	74	HTH_3	p_Bacillota;-_unclassified Bacillota;s_Bacillota bacterium
ERR11029134_NODE_10_curated_complete	ERR11029134_NODE_10_curated_complete_107	242	Metallophos_2	p_Bacillota;c_Clostridia;o_Lachnospirales;f_Lachnospiraceae;-_unclassified Lachnospiraceae;s_Lachnospiraceae bacterium KH1T2
ERR11029134_NODE_10_curated_complete	ERR11029134_NODE_10_curated_complete_108	453	Big_2 + Big_2 + CAP	p_Bacillota;c_Clostridia;o_Eubacteriales;f_Oscillospiraceae;g_Subdoligranulum;s_Subdoligranulum variabile
ERR11029134_NODE_10_curated_complete	ERR11029134_NODE_10_curated_complete_111	99	NA	p_Bacillota;c_Clostridia;o_Eubacteriales;-_unclassified Eubacteriales;s_Clostridiales bacterium
ERR11029134_NODE_10_curated_complete	ERR11029134_NODE_10_curated_complete_113	73	NA	p_Bacillota;c_Clostridia;o_Eubacteriales;-_unclassified Eubacteriales;s_Clostridiales bacterium
ERR11029134_NODE_10_curated_complete	ERR11029134_NODE_10_curated_complete_117	172	DSPc	p_Bacillota;c_Clostridia;o_Eubacteriales;f_Clostridiaceae;g_Clostridium;-_unclassified Clostridium;s_Clostridium sp.
ERR11029134_NODE_10_curated_complete	ERR11029134_NODE_10_curated_complete_119	160	NA	p_Bacillota;c_Clostridia;o_Eubacteriales;-_unclassified Eubacteriales;s_Clostridiales bacterium
ERR11029134_NODE_10_curated_complete	ERR11029134_NODE_10_curated_complete_122	67	NA	p_Bacillota;-_unclassified Bacillota;s_Firmicutes bacterium AF36-3BH
ERR11029134_NODE_10_curated_complete	ERR11029134_NODE_10_curated_complete_130	4153	Gly_rich + SdrD_B + SdrD_B + SdrD_B + SdrD_B + SpaA + Cna_B + Cna_B + Cna_B + Cna_B + Cna_B + Cna_B + Cna_B + Cna_B + Cna_B + Cna_B + Cna_B + Cna_B + Cna_B + Cna_B + Cna_B + Cna_B + Cna_B + Cna_B + Cna_B + Cna_B + Cna_B + Cna_B + Cna_B	p_Bacillota;c_Clostridia;o_Eubacteriales;f_Oscillospiraceae;g_Fournierella;s_Fournierella massiliensis
ERR11029134_NODE_10_curated_complete	ERR11029134_NODE_10_curated_complete_131	299	DnaB_2 + DnaB_2	p_Bacillota;c_Clostridia;o_Eubacteriales;-_Eubacteriales incertae sedis;g_Gemmiger;s_Gemmiger formicilis
ERR11029134_NODE_10_curated_complete	ERR11029134_NODE_10_curated_complete_132	319	IstB_IS21	p_Bacillota;c_Clostridia;o_Eubacteriales;-_Eubacteriales incertae sedis;g_Gemmiger;s_Gemmiger formicilis
ERR11029134_NODE_10_curated_complete	ERR11029134_NODE_10_curated_complete_133	131	Penicillinase_R	p_Bacillota;c_Clostridia;o_Eubacteriales;f_Oscillospiraceae;g_Subdoligranulum;s_Subdoligranulum variabile
ERR11029134_NODE_10_curated_complete	ERR11029134_NODE_10_curated_complete_135	775	HHH_4 + AAA_30 + SH3_13 + UvrD_C_2	p_Bacillota;-_unclassified Bacillota;s_Bacillota bacterium
ERR11029134_NODE_10_curated_complete	ERR11029134_NODE_10_curated_complete_137	360	ParBc	p_Bacillota;c_Clostridia;-_unclassified Clostridia;s_Clostridia bacterium
ERR11029134_NODE_10_curated_complete	ERR11029134_NODE_10_curated_complete_143	150	NA	p_Bacillota;c_Clostridia;o_Lachnospirales;f_Lachnospiraceae;g_Blautia;-_environmental samples;s_uncultured Blautia sp.
ERR11029134_NODE_10_curated_complete	ERR11029134_NODE_10_curated_complete_145	715	UvrD-helicase + UvrD-helicase + UvrD_C	p_Bacillota;c_Clostridia;o_Eubacteriales;f_Oscillospiraceae;g_Fournierella;s_Fournierella massiliensis
ERR11029134_NODE_10_curated_complete	ERR11029134_NODE_10_curated_complete_146	178	DUF1064	p_Bacillota;c_Clostridia;o_Eubacteriales;f_Oscillospiraceae;g_Anaerofilum;-_unclassified Anaerofilum;s_Anaerofilum sp. An201
ERR11029134_NODE_10_curated_complete	ERR11029134_NODE_10_curated_complete_147	251	Glyco_tran_WecB	p_Bacillota;c_Clostridia;o_Lachnospirales;f_Lachnospiraceae;g_Blautia;-_unclassified Blautia;s_Blautia sp. AM28-10
ERR11029134_NODE_10_curated_complete	ERR11029134_NODE_10_curated_complete_151	458	PolyA_pol + tRNA_NucTran2_2	p_Bacillota;c_Clostridia;o_Eubacteriales;f_Oscillospiraceae;g_Anaerofilum;-_unclassified Anaerofilum;s_Anaerofilum sp. An201
ERR11029134_NODE_10_curated_complete	ERR11029134_NODE_10_curated_complete_155	347	RlaP	p_Bacillota;c_Clostridia;o_Eubacteriales;f_Oscillospiraceae;g_Ruminococcus;s_Ruminococcus callidus;-_Ruminococcus callidus ATCC 27760
ERR11029134_NODE_10_curated_complete	ERR11029134_NODE_10_curated_complete_157	734	ResIII	p_Bacillota;c_Clostridia;o_Eubacteriales;f_Oscillospiraceae;g_Ruminococcus;-_unclassified Ruminococcus;s_Ruminococcus sp. AF31-8BH
ERR11029134_NODE_10_curated_complete	ERR11029134_NODE_10_curated_complete_160	312	Cas_Cas7	p_Bacillota;c_Clostridia;o_Eubacteriales;f_Eubacteriaceae;g_Eubacterium;-_unclassified Eubacterium (in: firmicutes);s_Eubacterium sp. An3
ERR11029134_NODE_10_curated_complete	ERR11029134_NODE_10_curated_complete_165	308	Transglut_core	p_Bacillota;c_Clostridia;o_Eubacteriales;f_Oscillospiraceae;g_Ruminococcus;-_unclassified Ruminococcus;s_Ruminococcus sp. CAG:330
ERR11029134_NODE_10_curated_complete	ERR11029134_NODE_10_curated_complete_167	100	NA	p_Bacillota;c_Clostridia;o_Eubacteriales;f_Oscillospiraceae;g_Anaerofilum;-_unclassified Anaerofilum;s_Anaerofilum sp. An201
ERR11029134_NODE_10_curated_complete	ERR11029134_NODE_10_curated_complete_168	238	NA	p_Bacillota;c_Clostridia;o_Eubacteriales;-_unclassified Eubacteriales;s_Clostridiales bacterium
ERR11029134_NODE_10_curated_complete	ERR11029134_NODE_10_curated_complete_170	259	DUF262	p_Bacillota;c_Clostridia;o_Eubacteriales;f_Oscillospiraceae;g_Anaerofilum;-_unclassified Anaerofilum;s_Anaerofilum sp. An201
ERR11029134_NODE_10_curated_complete	ERR11029134_NODE_10_curated_complete_175	186	Zeta_toxin	p_Bacillota;-_unclassified Bacillota;s_Bacillota bacterium
ERR11029134_NODE_10_curated_complete	ERR11029134_NODE_10_curated_complete_178	267	NA	p_Bacillota;c_Clostridia;o_Lachnospirales;f_Lachnospiraceae;g_Candidatus Epulonipiscium;-_unclassified Candidatus Epulonipiscium;s_Candidatus Epulonipiscium sp.
ERR11029134_NODE_10_curated_complete	ERR11029134_NODE_10_curated_complete_183	192	NT5C	p_Bacillota;c_Clostridia;o_Eubacteriales;f_Desulfitobacteriaceae;g_Desulfitobacterium;s_Desulfitobacterium chlororespirans;-_Desulfitobacterium chlororespirans DSM 11544
ERR11029134_NODE_10_curated_complete	ERR11029134_NODE_10_curated_complete_184	116	NA	p_Bacillota;c_Clostridia;o_Eubacteriales;f_Acutalibacteraceae;g_Anaeromassilibacillus;-_unclassified Anaeromassilibacillus;s_Anaeromassilibacillus sp. An250
ERR11029134_NODE_10_curated_complete	ERR11029134_NODE_10_curated_complete_185	60	DUF4314	p_Bacillota;c_Negativicutes;o_Veillonellales;f_Veillonellaceae;-_unclassified Veillonellaceae;s_Veillonellaceae bacterium
ERR11029134_NODE_10_curated_complete	ERR11029134_NODE_10_curated_complete_188	311	NA	p_Bacillota;c_Erysipelotrichia;o_Erysipelotrichales;f_Erysipelotrichaceae;g_Massilimicrobiota;-_unclassified Massilimicrobiota;s_Massilimicrobiota sp. An142
ERR11029134_NODE_10_curated_complete	ERR11029134_NODE_10_curated_complete_190	336	NA	p_Bacillota;c_Clostridia;o_Eubacteriales;-_unclassified Eubacteriales;s_Clostridiales bacterium
ERR11029134_NODE_10_curated_complete	ERR11029134_NODE_10_curated_complete_194	283	TraX	p_Bacillota;c_Clostridia;o_Lachnospirales;f_Lachnospiraceae;g_Blautia;s_Blautia hydrogenotrophica;-_Blautia hydrogenotrophica DSM 10507
ERR11029134_NODE_10_curated_complete	ERR11029134_NODE_10_curated_complete_195	256	Bro-N + ANT	p_Bacillota;c_Bacilli;o_Bacillales;f_Bacillaceae;g_Geobacillus;-_unclassified Geobacillus;s_Geobacillus sp. PA-3
ERR11029134_NODE_10_curated_complete	ERR11029134_NODE_10_curated_complete_198	142	NA	p_Bacillota;c_Clostridia;o_Eubacteriales;f_Oscillospiraceae;g_Anaerofilum;-_unclassified Anaerofilum;s_Anaerofilum sp. An201
ERR11029134_NODE_10_curated_complete	ERR11029134_NODE_10_curated_complete_201	220	NA	p_Bacillota;c_Erysipelotrichia;o_Erysipelotrichales;f_Erysipelotrichaceae;-_unclassified Erysipelotrichaceae;s_Erysipelotrichaceae bacterium
ERR11029134_NODE_10_curated_complete	ERR11029134_NODE_10_curated_complete_206	406	Big_2 + Big_2 + Big_2	p_Bacillota;c_Clostridia;o_Eubacteriales;-_Eubacteriales incertae sedis;g_Gemmiger;s_Gemmiger formicilis
ERR11029134_NODE_10_curated_complete	ERR11029134_NODE_10_curated_complete_207	224	NA	p_Bacillota;c_Clostridia;o_Eubacteriales;-_Eubacteriales incertae sedis;g_Gemmiger;s_Gemmiger formicilis
ERR11029134_NODE_10_curated_complete	ERR11029134_NODE_10_curated_complete_208	7325	MBG_2 + MBG_2 + MBG_2 + MBG_2 + MBG_2 + MBG_2 + MBG_2 + DUF11 + DUF11 + DUF11 + DUF11 + DUF11 + DUF11 + DUF11 + DUF11 + DUF11 + DUF11 + DUF11 + DUF11 + DUF11	p_Bacillota;c_Clostridia;o_Eubacteriales;f_Oscillospiraceae;g_Ruthenibacterium;s_Ruthenibacterium lactatiformans
ERR11029134_NODE_10_curated_complete	ERR11029134_NODE_10_curated_complete_214	512	Band_7 + Flot	p_Bacillota;c_Clostridia;o_Eubacteriales;f_Oscillospiraceae;g_Subdoligranulum;-_unclassified Subdoligranulum;s_Subdoligranulum sp.
ERR11029134_NODE_10_curated_complete	ERR11029134_NODE_10_curated_complete_222	320	StbA	p_Bacillota;c_Clostridia;o_Eubacteriales;f_Oscillospiraceae;g_Ruthenibacterium;s_Ruthenibacterium lactatiformans
ERR11029134_NODE_10_curated_complete	ERR11029134_NODE_10_curated_complete_226	354	NA	p_Bacillota;c_Clostridia;o_Eubacteriales;f_Oscillospiraceae;g_Anaerofilum;-_unclassified Anaerofilum;s_Anaerofilum sp. An201
ERR11029134_NODE_10_curated_complete	ERR11029134_NODE_10_curated_complete_234	226	zf-trcl + zf-trcl	p_Bacillota;c_Clostridia;o_Eubacteriales;f_Clostridiaceae;g_Clostridium;s_Clostridium grantii;-_Clostridium grantii DSM 8605
ERR11029134_NODE_10_curated_complete	ERR11029134_NODE_10_curated_complete_236	447	SecY	p_Bacillota;c_Clostridia;o_Eubacteriales;f_Oscillospiraceae;g_Faecalibacterium;s_Candidatus Faecalibacterium faecigallinarum
ERR11029134_NODE_10_curated_complete	ERR11029134_NODE_10_curated_complete_239	388	FKBP_C	p_Bacillota;c_Clostridia;o_Eubacteriales;f_Oscillospiraceae;g_Faecalibacterium;s_Faecalibacterium prausnitzii
ERR11029134_NODE_10_curated_complete	ERR11029134_NODE_10_curated_complete_240	324	Sortase	p_Bacillota;c_Bacilli;o_Lactobacillales;f_Streptococcaceae;g_Streptococcus;-_unclassified Streptococcus;s_Streptococcus sp. DAT741
ERR11029134_NODE_10_curated_complete	ERR11029134_NODE_10_curated_complete_247	183	NA	p_Bacillota;c_Clostridia;o_Eubacteriales;f_Clostridiaceae;g_Clostridium;-_unclassified Clostridium;s_Clostridium sp. AF50-3
ERR11029134_NODE_10_curated_complete	ERR11029134_NODE_10_curated_complete_250	247	NA	p_Bacillota;c_Clostridia;o_Eubacteriales;-_unclassified Eubacteriales;s_Clostridiales bacterium
ERR11029134_NODE_10_curated_complete	ERR11029134_NODE_10_curated_complete_253	266	DUF1281_C	p_Bacillota;c_Clostridia;o_Eubacteriales;f_Oscillospiraceae;-_unclassified Oscillospiraceae;s_Ruminococcaceae bacterium FB2012
ERR11029134_NODE_10_curated_complete	ERR11029134_NODE_10_curated_complete_255	104	NA	p_Bacillota;c_Clostridia;o_Lachnospirales;f_Lachnospiraceae;g_Blautia;-_unclassified Blautia;s_Blautia sp. An249
ERR11029134_NODE_10_curated_complete	ERR11029134_NODE_10_curated_complete_257	341	NA	p_Bacillota;c_Clostridia;o_Eubacteriales;-_unclassified Eubacteriales;s_Clostridiales bacterium
ERR11029134_NODE_10_curated_complete	ERR11029134_NODE_10_curated_complete_258	469	NA	p_Bacillota;c_Clostridia;o_Eubacteriales;f_Oscillospiraceae;g_Anaerofilum;-_unclassified Anaerofilum;s_Anaerofilum sp. An201
ERR11029134_NODE_10_curated_complete	ERR11029134_NODE_10_curated_complete_265	119	NA	p_Bacillota;c_Clostridia;o_Lachnospirales;f_Lachnospiraceae;-_unclassified Lachnospiraceae;s_Lachnospiraceae bacterium
ERR11029134_NODE_10_curated_complete	ERR11029134_NODE_10_curated_complete_266	358	NA	p_Bacillota;c_Clostridia;o_Eubacteriales;f_Oscillospiraceae;g_Anaerofilum;-_unclassified Anaerofilum;s_Anaerofilum sp. An201
ERR11029134_NODE_10_curated_complete	ERR11029134_NODE_10_curated_complete_268	182	NA	p_Bacillota;c_Clostridia;o_Eubacteriales;f_Oscillospiraceae;g_Ruthenibacterium;s_Ruthenibacterium lactatiformans
ERR11029134_NODE_10_curated_complete	ERR11029134_NODE_10_curated_complete_271	292	Endonuclea_NS_2	p_Bacillota;c_Clostridia;o_Eubacteriales;f_Clostridiaceae;g_Clostridium;-_unclassified Clostridium;s_Clostridium sp. AF27-2AA
ERR11029134_NODE_10_curated_complete	ERR11029134_NODE_10_curated_complete_273	151	HNH	p_Bacillota;c_Clostridia;o_Eubacteriales;f_Oscillospiraceae;g_Ruthenibacterium;s_Ruthenibacterium lactatiformans
ERR11029134_NODE_10_curated_complete	ERR11029134_NODE_10_curated_complete_277	649	NA	p_Bacillota;c_Clostridia;o_Lachnospirales;f_Lachnospiraceae;g_Enterocloster;s_Enterocloster bolteae;-_Enterocloster bolteae ATCC BAA-613
ERR11029134_NODE_10_curated_complete	ERR11029134_NODE_10_curated_complete_281	499	NA	p_Bacillota;c_Negativicutes;o_Veillonellales;f_Veillonellaceae;g_Dialister;s_Dialister hominis
ERR11029134_NODE_10_curated_complete	ERR11029134_NODE_10_curated_complete_282	662	NA	p_Bacillota;c_Clostridia;o_Eubacteriales;f_Eubacteriaceae;g_Eubacterium;-_unclassified Eubacterium (in: firmicutes);s_Eubacterium sp. OM08-24
ERR11029134_NODE_10_curated_complete	ERR11029134_NODE_10_curated_complete_283	237	NA	p_Bacillota;c_Clostridia;o_Eubacteriales;f_Oscillospiraceae;-_unclassified Oscillospiraceae;s_Oscillospiraceae bacterium NTUH-002-81
ERR11029134_NODE_10_curated_complete	ERR11029134_NODE_10_curated_complete_284	555	NA	p_Bacillota;c_Clostridia;o_Lachnospirales;f_Lachnospiraceae;g_Acetatifactor;s_Acetatifactor muris
ERR11029134_NODE_10_curated_complete	ERR11029134_NODE_10_curated_complete_288	164	NA	p_Bacillota;c_Clostridia;o_Eubacteriales;f_Oscillospiraceae;g_Faecalibacterium;-_unclassified Faecalibacterium;s_Faecalibacterium sp.
ERR11029134_NODE_10_curated_complete	ERR11029134_NODE_10_curated_complete_293	51	NA	p_Bacillota;c_Clostridia;o_Eubacteriales;f_Oscillospiraceae;g_Subdoligranulum;s_Subdoligranulum variabile
ERR11029134_NODE_10_curated_complete	ERR11029134_NODE_10_curated_complete_295	460	NA	p_Bacillota;c_Clostridia;o_Eubacteriales;f_Clostridiaceae;g_Clostridium;s_Clostridium perfringens
ERR11029134_NODE_10_curated_complete	ERR11029134_NODE_10_curated_complete_296	141	NA	p_Bacillota;c_Clostridia;o_Lachnospirales;f_Lachnospiraceae;-_unclassified Lachnospiraceae;s_Lachnospiraceae bacterium AM48-27BH
ERR11029134_NODE_10_curated_complete	ERR11029134_NODE_10_curated_complete_298	741	ATP-cone + NRDD	p_Bacillota;c_Clostridia;o_Eubacteriales;f_Oscillospiraceae;g_Subdoligranulum;s_Subdoligranulum variabile;-_Subdoligranulum variabile DSM 15176
ERR11029134_NODE_10_curated_complete	ERR11029134_NODE_10_curated_complete_302	153	DUF1768	p_Bacillota;c_Clostridia;o_Lachnospirales;f_Lachnospiraceae;g_Dorea;s_Dorea formicigenerans;-_Dorea formicigenerans ATCC 27755
ERR11029134_NODE_10_curated_complete	ERR11029134_NODE_10_curated_complete_304	200	NA	p_Bacillota;c_Clostridia;o_Eubacteriales;f_Oscillospiraceae;g_Anaerofilum;-_unclassified Anaerofilum;s_Anaerofilum sp. An201
ERR11029134_NODE_10_curated_complete	ERR11029134_NODE_10_curated_complete_305	69	NA	p_Bacillota;c_Clostridia;o_Eubacteriales;f_Oscillospiraceae;g_Ruthenibacterium;s_Ruthenibacterium lactatiformans
ERR11029134_NODE_10_curated_complete	ERR11029134_NODE_10_curated_complete_306	90	NA	p_Bacillota;c_Clostridia;o_Eubacteriales;f_Oscillospiraceae;g_Anaerofilum;-_unclassified Anaerofilum;s_Anaerofilum sp. An201
ERR11029134_NODE_10_curated_complete	ERR11029134_NODE_10_curated_complete_309	287	NA	p_Bacillota;c_Bacilli;o_Bacillales;f_Bacillaceae;g_Bacillus;-_unclassified Bacillus (in: firmicutes);s_Bacillus sp. MYb78
ERR11029134_NODE_10_curated_complete	ERR11029134_NODE_10_curated_complete_317	817	Toprim + Topoisom_bac	p_Bacillota;c_Clostridia;o_Eubacteriales;f_Oscillospiraceae;-_unclassified Oscillospiraceae;s_Oscillospiraceae bacterium
ERR11029134_NODE_10_curated_complete	ERR11029134_NODE_10_curated_complete_320	656	RecG_wedge + DEAD + Helicase_C	p_Bacillota;c_Clostridia;o_Eubacteriales;f_Oscillospiraceae;g_Anaerofilum;-_unclassified Anaerofilum;s_Anaerofilum sp. An201
ERR11029134_NODE_10_curated_complete	ERR11029134_NODE_10_curated_complete_325	110	NA	p_Bacillota;c_Clostridia;o_Eubacteriales;f_Oscillospiraceae;g_Subdoligranulum;-_unclassified Subdoligranulum;s_Subdoligranulum sp.
ERR11029134_NODE_10_curated_complete	ERR11029134_NODE_10_curated_complete_327	128	NA	p_Bacillota;c_Clostridia;o_Lachnospirales;f_Lachnospiraceae;g_Lachnoclostridium;s_Candidatus Lachnoclostridium stercoravium
ERR11029134_NODE_10_curated_complete	ERR11029134_NODE_10_curated_complete_330	151	zf-C4_Topoisom	p_Bacillota;c_Clostridia;o_Lachnospirales;f_Lachnospiraceae;-_unclassified Lachnospiraceae;s_Lachnospiraceae bacterium G41
ERR11029134_NODE_10_curated_complete	ERR11029134_NODE_10_curated_complete_333	496	Rep_3	p_Bacillota;c_Clostridia;o_Eubacteriales;f_Oscillospiraceae;-_unclassified Oscillospiraceae;s_Oscillospiraceae bacterium
ERR11029134_NODE_10_curated_complete	ERR11029134_NODE_10_curated_complete_334	283	AAA_31	p_Bacillota;c_Clostridia;o_Eubacteriales;f_Oscillospiraceae;-_unclassified Oscillospiraceae;s_Oscillospiraceae bacterium
ERR11029134_NODE_10_curated_complete	ERR11029134_NODE_10_curated_complete_335	433	ParBc	p_Bacillota;c_Clostridia;o_Eubacteriales;f_Oscillospiraceae;-_unclassified Oscillospiraceae;s_Oscillospiraceae bacterium
ERR11029134_NODE_10_curated_complete	ERR11029134_NODE_10_curated_complete_336	160	NA	p_Bacillota;c_Clostridia;o_Eubacteriales;f_Oscillospiraceae;-_unclassified Oscillospiraceae;s_Oscillospiraceae bacterium
ERR11029134_NODE_10_curated_complete	ERR11029134_NODE_10_curated_complete_338	172	NA	p_Bacillota;c_Bacilli;o_Bacillales;f_Paenibacillaceae;g_Paenibacillus;s_Paenibacillus peoriae
ERR11029134_NODE_10_curated_complete	ERR11029134_NODE_10_curated_complete_342	688	DNA_ligase_aden + DNA_ligase_OB + DNA_ligase_ZBD + BRCT	p_Bacillota;c_Bacilli;o_Lactobacillales;f_Lactobacillaceae;g_Weissella;s_Weissella diestrammenae
ERR11029134_NODE_10_curated_complete	ERR11029134_NODE_10_curated_complete_344	177	NT5C	p_Bacillota;c_Clostridia;o_Lachnospirales;f_Lachnospiraceae;g_Oribacterium;-_unclassified Oribacterium;s_Oribacterium sp. KHPX15
ERR11029134_NODE_10_curated_complete	ERR11029134_NODE_10_curated_complete_350	408	DUF3854	p_Bacillota;c_Erysipelotrichia;o_Erysipelotrichales;f_Erysipelotrichaceae;g_Stecheria;s_Stecheria intestinalis
ERR11029134_NODE_10_curated_complete	ERR11029134_NODE_10_curated_complete_352	338	NA	p_Bacillota;c_Clostridia;o_Eubacteriales;f_Oscillospiraceae;g_Ruthenibacterium;s_Ruthenibacterium lactatiformans
ERR11029134_NODE_10_curated_complete	ERR11029134_NODE_10_curated_complete_355	187	Peptidase_S24	p_Bacillota;c_Clostridia;o_Eubacteriales;f_Oscillospiraceae;g_Anaerofilum;-_unclassified Anaerofilum;s_Anaerofilum sp. An201
ERR11029134_NODE_10_curated_complete	ERR11029134_NODE_10_curated_complete_357	101	NA	p_Bacillota;c_Clostridia;o_Eubacteriales;-_unclassified Eubacteriales;s_Clostridiales bacterium
ERR11029134_NODE_10_curated_complete	ERR11029134_NODE_10_curated_complete_358	194	NA	p_Bacillota;c_Clostridia;o_Eubacteriales;f_Clostridiaceae;-_unclassified Clostridiaceae;s_Clostridiaceae bacterium
ERR11473358_NODE_44_curated_complete	ERR11473358_NODE_44_curated_complete_1	114	NA	p_Bacillota;c_Clostridia;o_Eubacteriales;f_Clostridiaceae;g_Clostridium;s_Clostridium botulinum;-_Clostridium botulinum F;-_Clostridium botulinum F str. Langeland
ERR11473358_NODE_44_curated_complete	ERR11473358_NODE_44_curated_complete_2	242	Metallophos	p_Bacillota;c_Clostridia;o_Lachnospirales;f_Lachnospiraceae;-_unclassified Lachnospiraceae;s_Lachnospiraceae bacterium KH1T2
ERR11473358_NODE_44_curated_complete	ERR11473358_NODE_44_curated_complete_3	453	Big_2 + Big_2 + CAP	p_Bacillota;c_Clostridia;o_Eubacteriales;f_Oscillospiraceae;g_Subdoligranulum;s_Subdoligranulum variabile
ERR11473358_NODE_44_curated_complete	ERR11473358_NODE_44_curated_complete_4	345	OrfB_IS605 + OrfB_Zn_ribbon	p_Bacillota;c_Clostridia;o_Lachnospirales;f_Lachnospiraceae;g_Lachnospira;s_Lachnospira multipara
ERR11473358_NODE_44_curated_complete	ERR11473358_NODE_44_curated_complete_6	271	DUF262	p_Bacillota;c_Clostridia;o_Eubacteriales;f_Oscillospiraceae;g_Anaerofilum;-_unclassified Anaerofilum;s_Anaerofilum sp. An201
ERR11473358_NODE_44_curated_complete	ERR11473358_NODE_44_curated_complete_7	92	NA	p_Bacillota;c_Clostridia;o_Eubacteriales;-_unclassified Eubacteriales;s_Clostridiales bacterium
ERR11473358_NODE_44_curated_complete	ERR11473358_NODE_44_curated_complete_9	73	NA	p_Bacillota;c_Clostridia;o_Eubacteriales;-_unclassified Eubacteriales;s_Clostridiales bacterium
ERR11473358_NODE_44_curated_complete	ERR11473358_NODE_44_curated_complete_13	172	DSPc	p_Bacillota;c_Clostridia;o_Eubacteriales;f_Clostridiaceae;g_Clostridium;-_unclassified Clostridium;s_Clostridium sp.
ERR11473358_NODE_44_curated_complete	ERR11473358_NODE_44_curated_complete_15	160	NA	p_Bacillota;c_Clostridia;o_Eubacteriales;-_unclassified Eubacteriales;s_Clostridiales bacterium
ERR11473358_NODE_44_curated_complete	ERR11473358_NODE_44_curated_complete_18	67	NA	p_Bacillota;-_unclassified Bacillota;s_Firmicutes bacterium AF36-3BH
ERR11473358_NODE_44_curated_complete	ERR11473358_NODE_44_curated_complete_27	134	Y1_Tnp	p_Bacillota;c_Bacilli;o_Bacillales;f_Bacillaceae;g_Bacillus;-_unclassified Bacillus (in: firmicutes);s_Bacillus sp. PGP15
ERR11473358_NODE_44_curated_complete	ERR11473358_NODE_44_curated_complete_28	579	NA	p_Bacillota;c_Clostridia;o_Eubacteriales;f_Oscillospiraceae;g_Subdoligranulum;-_unclassified Subdoligranulum;s_Subdoligranulum sp.
ERR11473358_NODE_44_curated_complete	ERR11473358_NODE_44_curated_complete_31	134	Y1_Tnp	p_Bacillota;c_Bacilli;o_Bacillales;f_Bacillaceae;g_Bacillus;-_Bacillus cereus group;s_Bacillus thuringiensis;-_Bacillus thuringiensis serovar thuringiensis;-_Bacillus thuringiensis serovar thuringiensis str. IS5056
ERR11473358_NODE_44_curated_complete	ERR11473358_NODE_44_curated_complete_32	579	NA	p_Bacillota;c_Clostridia;o_Eubacteriales;f_Oscillospiraceae;g_Subdoligranulum;-_unclassified Subdoligranulum;s_Subdoligranulum sp.
ERR11473358_NODE_44_curated_complete	ERR11473358_NODE_44_curated_complete_33	156	Cna_B	p_Bacillota;c_Bacilli;o_Lactobacillales;f_Carnobacteriaceae;-_unclassified Carnobacteriaceae;s_Carnobacteriaceae bacterium zg-84
ERR11473358_NODE_44_curated_complete	ERR11473358_NODE_44_curated_complete_34	299	DnaB_2 + DnaB_2	p_Bacillota;c_Clostridia;o_Eubacteriales;-_Eubacteriales incertae sedis;g_Gemmiger;s_Gemmiger formicilis
ERR11473358_NODE_44_curated_complete	ERR11473358_NODE_44_curated_complete_35	319	IstB_IS21	p_Bacillota;c_Clostridia;o_Eubacteriales;-_Eubacteriales incertae sedis;g_Gemmiger;s_Gemmiger formicilis
ERR11473358_NODE_44_curated_complete	ERR11473358_NODE_44_curated_complete_36	131	Penicillinase_R	p_Bacillota;c_Clostridia;o_Eubacteriales;f_Oscillospiraceae;g_Subdoligranulum;s_Subdoligranulum variabile
ERR11473358_NODE_44_curated_complete	ERR11473358_NODE_44_curated_complete_38	775	HHH_4 + AAA_30 + SH3_13 + UvrD_C_2	p_Bacillota;-_unclassified Bacillota;s_Bacillota bacterium
ERR11473358_NODE_44_curated_complete	ERR11473358_NODE_44_curated_complete_40	360	ParBc	p_Bacillota;c_Clostridia;-_unclassified Clostridia;s_Clostridia bacterium
ERR11473358_NODE_44_curated_complete	ERR11473358_NODE_44_curated_complete_46	145	NA	p_Bacillota;c_Clostridia;o_Eubacteriales;f_Oscillospiraceae;g_Pusillibacter;s_Pusillibacter faecalis
ERR11473358_NODE_44_curated_complete	ERR11473358_NODE_44_curated_complete_48	715	UvrD-helicase + UvrD-helicase + UvrD_C	p_Bacillota;c_Clostridia;o_Eubacteriales;f_Oscillospiraceae;g_Fournierella;s_Fournierella massiliensis
ERR11473358_NODE_44_curated_complete	ERR11473358_NODE_44_curated_complete_49	178	DUF1064	p_Bacillota;c_Clostridia;o_Eubacteriales;f_Oscillospiraceae;g_Anaerofilum;-_unclassified Anaerofilum;s_Anaerofilum sp. An201
ERR11473358_NODE_44_curated_complete	ERR11473358_NODE_44_curated_complete_50	251	Glyco_tran_WecB	p_Bacillota;c_Clostridia;o_Lachnospirales;f_Lachnospiraceae;g_Blautia;-_unclassified Blautia;s_Blautia sp. AM28-10
ERR11473358_NODE_44_curated_complete	ERR11473358_NODE_44_curated_complete_54	513	RRXRR	p_Bacillota;c_Clostridia;o_Lachnospirales;f_Lachnospiraceae;g_Anaerostipes;s_Anaerostipes hadrus
ERR11473358_NODE_44_curated_complete	ERR11473358_NODE_44_curated_complete_55	458	PolyA_pol + tRNA_NucTran2_2	p_Bacillota;c_Clostridia;o_Eubacteriales;f_Oscillospiraceae;g_Anaerofilum;-_unclassified Anaerofilum;s_Anaerofilum sp. An201
ERR11473358_NODE_44_curated_complete	ERR11473358_NODE_44_curated_complete_59	347	RlaP	p_Bacillota;c_Clostridia;o_Eubacteriales;f_Oscillospiraceae;g_Ruminococcus;-_unclassified Ruminococcus;s_Ruminococcus sp. OM06-36AC
ERR11473358_NODE_44_curated_complete	ERR11473358_NODE_44_curated_complete_61	738	ResIII	p_Bacillota;c_Clostridia;o_Eubacteriales;f_Oscillospiraceae;g_Ruminococcus;-_unclassified Ruminococcus;s_Ruminococcus sp. AF31-8BH
ERR11473358_NODE_44_curated_complete	ERR11473358_NODE_44_curated_complete_64	312	Cas_Cas7	p_Bacillota;c_Clostridia;o_Eubacteriales;f_Eubacteriaceae;g_Eubacterium;-_unclassified Eubacterium (in: firmicutes);s_Eubacterium sp. An3
ERR11473358_NODE_44_curated_complete	ERR11473358_NODE_44_curated_complete_69	308	Transglut_core	p_Bacillota;c_Clostridia;o_Eubacteriales;f_Oscillospiraceae;g_Ruminococcus;-_unclassified Ruminococcus;s_Ruminococcus sp. CAG:330
ERR11473358_NODE_44_curated_complete	ERR11473358_NODE_44_curated_complete_71	100	NA	p_Bacillota;c_Clostridia;o_Eubacteriales;f_Oscillospiraceae;g_Anaerofilum;-_unclassified Anaerofilum;s_Anaerofilum sp. An201
ERR11473358_NODE_44_curated_complete	ERR11473358_NODE_44_curated_complete_72	238	NA	p_Bacillota;c_Clostridia;o_Eubacteriales;-_unclassified Eubacteriales;s_Clostridiales bacterium
ERR11473358_NODE_44_curated_complete	ERR11473358_NODE_44_curated_complete_73	205	NA	p_Bacillota;c_Clostridia;o_Eubacteriales;f_Oscillospiraceae;g_Anaerofilum;-_unclassified Anaerofilum;s_Anaerofilum sp. An201
ERR11473358_NODE_44_curated_complete	ERR11473358_NODE_44_curated_complete_74	259	DUF262	p_Bacillota;c_Clostridia;o_Eubacteriales;f_Oscillospiraceae;g_Anaerofilum;-_unclassified Anaerofilum;s_Anaerofilum sp. An201
ERR11473358_NODE_44_curated_complete	ERR11473358_NODE_44_curated_complete_79	186	Zeta_toxin	p_Bacillota;-_unclassified Bacillota;s_Bacillota bacterium
ERR11473358_NODE_44_curated_complete	ERR11473358_NODE_44_curated_complete_82	267	NA	p_Bacillota;c_Clostridia;o_Lachnospirales;f_Lachnospiraceae;g_Candidatus Epulonipiscium;-_unclassified Candidatus Epulonipiscium;s_Candidatus Epulonipiscium sp.
ERR11473358_NODE_44_curated_complete	ERR11473358_NODE_44_curated_complete_86	192	NT5C	p_Bacillota;c_Clostridia;o_Eubacteriales;f_Desulfitobacteriaceae;g_Desulfitobacterium;s_Desulfitobacterium chlororespirans;-_Desulfitobacterium chlororespirans DSM 11544
ERR11473358_NODE_44_curated_complete	ERR11473358_NODE_44_curated_complete_87	116	NA	p_Bacillota;c_Clostridia;o_Eubacteriales;f_Acutalibacteraceae;g_Anaeromassilibacillus;-_unclassified Anaeromassilibacillus;s_Anaeromassilibacillus sp. An250
ERR11473358_NODE_44_curated_complete	ERR11473358_NODE_44_curated_complete_88	72	DUF4314	p_Bacillota;c_Erysipelotrichia;o_Erysipelotrichales;f_Erysipelotrichaceae;-_unclassified Erysipelotrichaceae;s_Erysipelotrichaceae bacterium MTC7
ERR11473358_NODE_44_curated_complete	ERR11473358_NODE_44_curated_complete_90	311	NA	p_Bacillota;c_Erysipelotrichia;o_Erysipelotrichales;f_Erysipelotrichaceae;g_Massilimicrobiota;-_unclassified Massilimicrobiota;s_Massilimicrobiota sp. An142
ERR11473358_NODE_44_curated_complete	ERR11473358_NODE_44_curated_complete_92	336	NA	p_Bacillota;c_Clostridia;o_Eubacteriales;-_unclassified Eubacteriales;s_Clostridiales bacterium
ERR11473358_NODE_44_curated_complete	ERR11473358_NODE_44_curated_complete_96	85	HicA_toxin	p_Bacillota;c_Clostridia;o_Lachnospirales;f_Lachnospiraceae;g_Lachnospira;s_Lachnospira eligens
ERR11473358_NODE_44_curated_complete	ERR11473358_NODE_44_curated_complete_97	122	HicB_lk_antitox	p_Bacillota;c_Clostridia;o_Eubacteriales;f_Eubacteriaceae;g_Eubacterium;-_unclassified Eubacterium (in: firmicutes);s_Eubacterium sp. CAG:274
ERR11473358_NODE_44_curated_complete	ERR11473358_NODE_44_curated_complete_98	283	TraX	p_Bacillota;c_Clostridia;o_Eubacteriales;f_Oscillospiraceae;g_Subdoligranulum;-_unclassified Subdoligranulum;s_Subdoligranulum sp.
ERR11473358_NODE_44_curated_complete	ERR11473358_NODE_44_curated_complete_99	256	Bro-N + ANT	p_Bacillota;c_Bacilli;o_Bacillales;f_Bacillaceae;g_Geobacillus;-_unclassified Geobacillus;s_Geobacillus sp. PA-3
ERR11473358_NODE_44_curated_complete	ERR11473358_NODE_44_curated_complete_102	142	NA	p_Bacillota;c_Clostridia;o_Eubacteriales;f_Oscillospiraceae;g_Anaerofilum;-_unclassified Anaerofilum;s_Anaerofilum sp. An201
ERR11473358_NODE_44_curated_complete	ERR11473358_NODE_44_curated_complete_105	382	HTH_OrfB_IS605 + OrfB_IS605 + OrfB_Zn_ribbon	p_Bacillota;c_Bacilli;o_Bacillales;f_Alicyclobacillaceae;g_Alicyclobacillus;s_Alicyclobacillus mengziensis
ERR11473358_NODE_44_curated_complete	ERR11473358_NODE_44_curated_complete_106	162	NA	p_Bacillota;c_Erysipelotrichia;o_Erysipelotrichales;f_Erysipelotrichaceae;-_unclassified Erysipelotrichaceae;s_Erysipelotrichaceae bacterium
ERR11473358_NODE_44_curated_complete	ERR11473358_NODE_44_curated_complete_111	426	Big_2 + Big_2 + Big_2 + zf-C2H2_10	p_Bacillota;c_Clostridia;o_Eubacteriales;-_Eubacteriales incertae sedis;g_Gemmiger;s_Gemmiger formicilis
ERR11473358_NODE_44_curated_complete	ERR11473358_NODE_44_curated_complete_112	7323	MBG_2 + MBG_2 + MBG_2 + MBG_2 + MBG_2 + MBG_2 + DUF11 + DUF11 + DUF11 + DUF11 + DUF11 + DUF11 + DUF11 + DUF11 + DUF11 + DUF11 + DUF11 + DUF11 + DUF11 + DUF11 + DUF11	p_Bacillota;c_Clostridia;o_Eubacteriales;f_Oscillospiraceae;g_Ruthenibacterium;s_Ruthenibacterium lactatiformans
ERR11473358_NODE_44_curated_complete	ERR11473358_NODE_44_curated_complete_118	512	Band_7 + Flot	p_Bacillota;c_Clostridia;o_Eubacteriales;f_Oscillospiraceae;g_Subdoligranulum;-_unclassified Subdoligranulum;s_Subdoligranulum sp.
ERR11473358_NODE_44_curated_complete	ERR11473358_NODE_44_curated_complete_126	320	StbA	p_Bacillota;c_Clostridia;o_Eubacteriales;f_Oscillospiraceae;g_Ruthenibacterium;s_Ruthenibacterium lactatiformans
ERR11473358_NODE_44_curated_complete	ERR11473358_NODE_44_curated_complete_130	354	NA	p_Bacillota;c_Clostridia;o_Eubacteriales;f_Oscillospiraceae;g_Anaerofilum;-_unclassified Anaerofilum;s_Anaerofilum sp. An201
ERR11473358_NODE_44_curated_complete	ERR11473358_NODE_44_curated_complete_138	226	zf-trcl + zf-trcl	p_Bacillota;c_Clostridia;o_Eubacteriales;f_Clostridiaceae;g_Clostridium;s_Clostridium grantii;-_Clostridium grantii DSM 8605
ERR11473358_NODE_44_curated_complete	ERR11473358_NODE_44_curated_complete_140	447	SecY	p_Bacillota;c_Clostridia;o_Eubacteriales;f_Oscillospiraceae;g_Faecalibacterium;s_Candidatus Faecalibacterium faecigallinarum
ERR11473358_NODE_44_curated_complete	ERR11473358_NODE_44_curated_complete_143	388	FKBP_C	p_Bacillota;c_Clostridia;o_Eubacteriales;f_Oscillospiraceae;g_Faecalibacterium;s_Faecalibacterium prausnitzii
ERR11473358_NODE_44_curated_complete	ERR11473358_NODE_44_curated_complete_144	324	Sortase	p_Bacillota;c_Bacilli;o_Lactobacillales;f_Streptococcaceae;g_Streptococcus;-_unclassified Streptococcus;s_Streptococcus sp. DAT741
ERR11473358_NODE_44_curated_complete	ERR11473358_NODE_44_curated_complete_150	183	NA	p_Bacillota;c_Clostridia;o_Eubacteriales;f_Clostridiaceae;g_Clostridium;-_unclassified Clostridium;s_Clostridium sp. AF50-3
ERR11473358_NODE_44_curated_complete	ERR11473358_NODE_44_curated_complete_153	247	NA	p_Bacillota;c_Clostridia;o_Eubacteriales;-_unclassified Eubacteriales;s_Clostridiales bacterium
ERR11473358_NODE_44_curated_complete	ERR11473358_NODE_44_curated_complete_156	266	DUF1281_C	p_Bacillota;c_Clostridia;o_Eubacteriales;f_Oscillospiraceae;-_unclassified Oscillospiraceae;s_Ruminococcaceae bacterium FB2012
ERR11473358_NODE_44_curated_complete	ERR11473358_NODE_44_curated_complete_158	104	NA	p_Bacillota;c_Clostridia;o_Lachnospirales;f_Lachnospiraceae;g_Blautia;-_unclassified Blautia;s_Blautia sp. An249
ERR11473358_NODE_44_curated_complete	ERR11473358_NODE_44_curated_complete_160	342	NA	p_Bacillota;c_Clostridia;o_Eubacteriales;-_unclassified Eubacteriales;s_Clostridiales bacterium
ERR11473358_NODE_44_curated_complete	ERR11473358_NODE_44_curated_complete_161	469	NA	p_Bacillota;c_Clostridia;o_Eubacteriales;f_Oscillospiraceae;g_Anaerofilum;-_unclassified Anaerofilum;s_Anaerofilum sp. An201
ERR11473358_NODE_44_curated_complete	ERR11473358_NODE_44_curated_complete_167	119	NA	p_Bacillota;c_Clostridia;o_Lachnospirales;f_Lachnospiraceae;-_unclassified Lachnospiraceae;s_Lachnospiraceae bacterium
ERR11473358_NODE_44_curated_complete	ERR11473358_NODE_44_curated_complete_168	358	NA	p_Bacillota;c_Clostridia;o_Eubacteriales;f_Oscillospiraceae;g_Anaerofilum;-_unclassified Anaerofilum;s_Anaerofilum sp. An201
ERR11473358_NODE_44_curated_complete	ERR11473358_NODE_44_curated_complete_170	182	NA	p_Bacillota;c_Clostridia;o_Eubacteriales;f_Oscillospiraceae;g_Ruthenibacterium;s_Ruthenibacterium lactatiformans
ERR11473358_NODE_44_curated_complete	ERR11473358_NODE_44_curated_complete_173	292	Endonuclea_NS_2	p_Bacillota;c_Clostridia;o_Eubacteriales;f_Clostridiaceae;g_Clostridium;-_unclassified Clostridium;s_Clostridium sp. AF27-2AA
ERR11473358_NODE_44_curated_complete	ERR11473358_NODE_44_curated_complete_175	151	HNH	p_Bacillota;c_Clostridia;o_Eubacteriales;f_Oscillospiraceae;g_Ruthenibacterium;s_Ruthenibacterium lactatiformans
ERR11473358_NODE_44_curated_complete	ERR11473358_NODE_44_curated_complete_176	119	Penicillinase_R	p_Bacillota;c_Clostridia;o_Lachnospirales;f_Lachnospiraceae;-_unclassified Lachnospiraceae;s_Lachnospiraceae bacterium
ERR11473358_NODE_44_curated_complete	ERR11473358_NODE_44_curated_complete_179	649	NA	p_Bacillota;c_Clostridia;o_Lachnospirales;f_Lachnospiraceae;g_Enterocloster;s_Enterocloster bolteae;-_Enterocloster bolteae ATCC BAA-613
ERR11473358_NODE_44_curated_complete	ERR11473358_NODE_44_curated_complete_183	499	NA	p_Bacillota;c_Negativicutes;o_Veillonellales;f_Veillonellaceae;g_Dialister;s_Dialister hominis
ERR11473358_NODE_44_curated_complete	ERR11473358_NODE_44_curated_complete_184	662	NA	p_Bacillota;c_Clostridia;o_Eubacteriales;f_Eubacteriaceae;g_Eubacterium;-_unclassified Eubacterium (in: firmicutes);s_Eubacterium sp. OM08-24
ERR11473358_NODE_44_curated_complete	ERR11473358_NODE_44_curated_complete_185	237	NA	p_Bacillota;c_Clostridia;o_Eubacteriales;f_Oscillospiraceae;-_unclassified Oscillospiraceae;s_Oscillospiraceae bacterium NTUH-002-81
ERR11473358_NODE_44_curated_complete	ERR11473358_NODE_44_curated_complete_186	555	NA	p_Bacillota;c_Clostridia;o_Lachnospirales;f_Lachnospiraceae;g_Acetatifactor;s_Acetatifactor muris
ERR11473358_NODE_44_curated_complete	ERR11473358_NODE_44_curated_complete_190	164	NA	p_Bacillota;c_Clostridia;o_Eubacteriales;f_Oscillospiraceae;g_Faecalibacterium;-_unclassified Faecalibacterium;s_Faecalibacterium sp.
ERR11473358_NODE_44_curated_complete	ERR11473358_NODE_44_curated_complete_195	51	NA	p_Bacillota;c_Clostridia;o_Eubacteriales;f_Oscillospiraceae;g_Subdoligranulum;s_Subdoligranulum variabile
ERR11473358_NODE_44_curated_complete	ERR11473358_NODE_44_curated_complete_197	460	NA	p_Bacillota;c_Clostridia;o_Eubacteriales;f_Clostridiaceae;g_Clostridium;s_Clostridium perfringens
ERR11473358_NODE_44_curated_complete	ERR11473358_NODE_44_curated_complete_198	141	NA	p_Bacillota;c_Clostridia;o_Lachnospirales;f_Lachnospiraceae;-_unclassified Lachnospiraceae;s_Lachnospiraceae bacterium AM48-27BH
ERR11473358_NODE_44_curated_complete	ERR11473358_NODE_44_curated_complete_200	741	ATP-cone + NRDD	p_Bacillota;c_Clostridia;o_Eubacteriales;f_Oscillospiraceae;g_Subdoligranulum;s_Subdoligranulum variabile;-_Subdoligranulum variabile DSM 15176
ERR11473358_NODE_44_curated_complete	ERR11473358_NODE_44_curated_complete_204	153	DUF1768	p_Bacillota;c_Clostridia;o_Lachnospirales;f_Lachnospiraceae;g_Dorea;s_Dorea formicigenerans;-_Dorea formicigenerans ATCC 27755
ERR11473358_NODE_44_curated_complete	ERR11473358_NODE_44_curated_complete_206	200	NA	p_Bacillota;c_Clostridia;o_Eubacteriales;f_Oscillospiraceae;g_Anaerofilum;-_unclassified Anaerofilum;s_Anaerofilum sp. An201
ERR11473358_NODE_44_curated_complete	ERR11473358_NODE_44_curated_complete_207	69	NA	p_Bacillota;c_Clostridia;o_Eubacteriales;f_Oscillospiraceae;g_Ruthenibacterium;s_Ruthenibacterium lactatiformans
ERR11473358_NODE_44_curated_complete	ERR11473358_NODE_44_curated_complete_208	90	NA	p_Bacillota;c_Clostridia;o_Eubacteriales;f_Oscillospiraceae;g_Anaerofilum;-_unclassified Anaerofilum;s_Anaerofilum sp. An201
ERR11473358_NODE_44_curated_complete	ERR11473358_NODE_44_curated_complete_211	81	NA	p_Bacillota;c_Bacilli;o_Bacillales;f_Bacillaceae;g_Bacillus;-_unclassified Bacillus (in: firmicutes);s_Bacillus sp. MYb78
ERR11473358_NODE_44_curated_complete	ERR11473358_NODE_44_curated_complete_220	817	Toprim + Topoisom_bac	p_Bacillota;c_Clostridia;o_Eubacteriales;f_Oscillospiraceae;-_unclassified Oscillospiraceae;s_Oscillospiraceae bacterium
ERR11473358_NODE_44_curated_complete	ERR11473358_NODE_44_curated_complete_223	656	RecG_wedge + DEAD + Helicase_C	p_Bacillota;c_Clostridia;o_Eubacteriales;f_Oscillospiraceae;g_Anaerofilum;-_unclassified Anaerofilum;s_Anaerofilum sp. An201
ERR11473358_NODE_44_curated_complete	ERR11473358_NODE_44_curated_complete_226	895	VWA	p_Bacillota;c_Clostridia;o_Eubacteriales;f_Oscillospiraceae;g_Ruthenibacterium;s_Ruthenibacterium lactatiformans
ERR11473358_NODE_44_curated_complete	ERR11473358_NODE_44_curated_complete_228	110	NA	p_Bacillota;c_Clostridia;o_Eubacteriales;f_Oscillospiraceae;g_Subdoligranulum;-_unclassified Subdoligranulum;s_Subdoligranulum sp.
ERR11473358_NODE_44_curated_complete	ERR11473358_NODE_44_curated_complete_229	128	NA	p_Bacillota;c_Clostridia;o_Lachnospirales;f_Lachnospiraceae;g_Lachnoclostridium;s_Candidatus Lachnoclostridium stercoravium
ERR11473358_NODE_44_curated_complete	ERR11473358_NODE_44_curated_complete_232	151	zf-C4_Topoisom	p_Bacillota;c_Clostridia;o_Lachnospirales;f_Lachnospiraceae;-_unclassified Lachnospiraceae;s_Lachnospiraceae bacterium G41
ERR11473358_NODE_44_curated_complete	ERR11473358_NODE_44_curated_complete_233	496	Rep_3	p_Bacillota;c_Clostridia;o_Eubacteriales;f_Oscillospiraceae;-_unclassified Oscillospiraceae;s_Oscillospiraceae bacterium
ERR11473358_NODE_44_curated_complete	ERR11473358_NODE_44_curated_complete_234	283	AAA_31	p_Bacillota;c_Clostridia;o_Eubacteriales;f_Oscillospiraceae;-_unclassified Oscillospiraceae;s_Oscillospiraceae bacterium
ERR11473358_NODE_44_curated_complete	ERR11473358_NODE_44_curated_complete_235	433	ParBc	p_Bacillota;c_Clostridia;o_Eubacteriales;f_Oscillospiraceae;-_unclassified Oscillospiraceae;s_Oscillospiraceae bacterium
ERR11473358_NODE_44_curated_complete	ERR11473358_NODE_44_curated_complete_236	170	NA	p_Bacillota;c_Clostridia;o_Eubacteriales;f_Oscillospiraceae;-_unclassified Oscillospiraceae;s_Oscillospiraceae bacterium
ERR11473358_NODE_44_curated_complete	ERR11473358_NODE_44_curated_complete_237	389	OrfB_IS605 + OrfB_Zn_ribbon	p_Bacillota;c_Erysipelotrichia;o_Erysipelotrichales;f_Coprobacillaceae;g_Faecalibacillus;s_Faecalibacillus intestinalis
ERR11473358_NODE_44_curated_complete	ERR11473358_NODE_44_curated_complete_239	172	NA	p_Bacillota;c_Bacilli;o_Bacillales;f_Paenibacillaceae;g_Paenibacillus;s_Paenibacillus peoriae
ERR11473358_NODE_44_curated_complete	ERR11473358_NODE_44_curated_complete_245	688	DNA_ligase_aden + DNA_ligase_OB + DNA_ligase_ZBD + BRCT	p_Bacillota;c_Bacilli;o_Lactobacillales;f_Lactobacillaceae;g_Weissella;s_Weissella diestrammenae
ERR11473358_NODE_44_curated_complete	ERR11473358_NODE_44_curated_complete_247	177	NT5C	p_Bacillota;c_Clostridia;o_Eubacteriales;f_Oscillospiraceae;g_Anaerofilum;-_unclassified Anaerofilum;s_Anaerofilum sp. An201
ERR11473358_NODE_44_curated_complete	ERR11473358_NODE_44_curated_complete_253	408	DUF3854	p_Bacillota;c_Erysipelotrichia;o_Erysipelotrichales;f_Erysipelotrichaceae;g_Stecheria;s_Stecheria intestinalis
ERR11473358_NODE_44_curated_complete	ERR11473358_NODE_44_curated_complete_255	338	NA	p_Bacillota;c_Clostridia;o_Eubacteriales;f_Oscillospiraceae;g_Ruthenibacterium;s_Ruthenibacterium lactatiformans
ERR11473358_NODE_44_curated_complete	ERR11473358_NODE_44_curated_complete_258	171	Peptidase_S24	p_Bacillota;c_Clostridia;o_Eubacteriales;f_Oscillospiraceae;g_Anaerofilum;-_unclassified Anaerofilum;s_Anaerofilum sp. An201
ERR11473358_NODE_44_curated_complete	ERR11473358_NODE_44_curated_complete_260	101	NA	p_Bacillota;c_Clostridia;o_Eubacteriales;-_unclassified Eubacteriales;s_Clostridiales bacterium
ERR11473358_NODE_44_curated_complete	ERR11473358_NODE_44_curated_complete_263	253	Thy1	p_Bacillota;c_Clostridia;o_Eubacteriales;f_Oscillospiraceae;-_unclassified Oscillospiraceae;s_Oscillospiraceae bacterium
ERR11473358_NODE_44_curated_complete	ERR11473358_NODE_44_curated_complete_264	79	NA	p_Bacillota;c_Clostridia;o_Eubacteriales;f_Clostridiaceae;g_Clostridium;-_environmental samples;s_uncultured Clostridium sp.
ERR11473358_NODE_44_curated_complete	ERR11473358_NODE_44_curated_complete_265	191	NA	p_Bacillota;c_Clostridia;o_Eubacteriales;f_Oscillospiraceae;g_Anaerofilum;-_unclassified Anaerofilum;s_Anaerofilum sp. An201
ERR11473358_NODE_44_curated_complete	ERR11473358_NODE_44_curated_complete_267	250	NA	p_Bacillota;c_Bacilli;o_Bacillales;f_Bacillaceae;g_Bacillus;-_unclassified Bacillus (in: firmicutes);s_Bacillus sp. TH008
ERR11473358_NODE_44_curated_complete	ERR11473358_NODE_44_curated_complete_270	222	NA	p_Bacillota;c_Clostridia;o_Eubacteriales;f_Butyricicoccaceae;g_Butyricicoccus;-_unclassified Butyricicoccus;s_Butyricicoccus sp. AF22-28AC
ERR11473358_NODE_44_curated_complete	ERR11473358_NODE_44_curated_complete_272	414	YqaJ	p_Bacillota;c_Clostridia;o_Eubacteriales;f_Oscillospiraceae;g_Ruthenibacterium;s_Ruthenibacterium lactatiformans
ERR11473358_NODE_44_curated_complete	ERR11473358_NODE_44_curated_complete_275	766	HHH_4 + AAA_30 + SH3_13 + UvrD_C_2	p_Bacillota;c_Clostridia;o_Eubacteriales;f_Oscillospiraceae;g_Anaerofilum;-_unclassified Anaerofilum;s_Anaerofilum sp. An201
ERR11473358_NODE_44_curated_complete	ERR11473358_NODE_44_curated_complete_277	1336	NA	p_Bacillota;c_Clostridia;o_Eubacteriales;f_Oscillospiraceae;g_Ruthenibacterium;s_Ruthenibacterium lactatiformans
ERR11473358_NODE_44_curated_complete	ERR11473358_NODE_44_curated_complete_280	270	N6_N4_Mtase	p_Bacillota;c_Clostridia;o_Lachnospirales;f_Lachnospiraceae;g_Lachnospira;s_Lachnospira eligens
ERR11473358_NODE_44_curated_complete	ERR11473358_NODE_44_curated_complete_285	123	NA	p_Bacillota;c_Clostridia;o_Eubacteriales;f_Clostridiaceae;g_Clostridium;s_Clostridium botulinum
ERR11473358_NODE_44_curated_complete	ERR11473358_NODE_44_curated_complete_286	238	HNH	p_Bacillota;c_Clostridia;o_Eubacteriales;f_Clostridiaceae;g_Clostridium;-_unclassified Clostridium;s_Clostridium sp. AF50-3
ERR11473358_NODE_44_curated_complete	ERR11473358_NODE_44_curated_complete_287	251	NA	p_Bacillota;c_Erysipelotrichia;o_Erysipelotrichales;f_Erysipelotrichaceae;g_Faecalitalea;s_Faecalitalea cylindroides
ERR11473358_NODE_44_curated_complete	ERR11473358_NODE_44_curated_complete_288	787	T4SS-DNA_transf + TraG-D_C	p_Bacillota;c_Clostridia;o_Eubacteriales;f_Oscillospiraceae;g_Ruthenibacterium;s_Ruthenibacterium lactatiformans
ERR11473358_NODE_44_curated_complete	ERR11473358_NODE_44_curated_complete_289	384	NA	p_Bacillota;c_Clostridia;o_Eubacteriales;f_Oscillospiraceae;g_Anaerofilum;-_unclassified Anaerofilum;s_Anaerofilum sp. An201
ERR11473358_NODE_44_curated_complete	ERR11473358_NODE_44_curated_complete_292	505	NA	p_Bacillota;c_Clostridia;o_Eubacteriales;f_Oscillospiraceae;g_Ruthenibacterium;s_Ruthenibacterium lactatiformans
ERR11473358_NODE_44_curated_complete	ERR11473358_NODE_44_curated_complete_293	855	NA	p_Bacillota;c_Clostridia;o_Eubacteriales;f_Oscillospiraceae;g_Anaerofilum;-_unclassified Anaerofilum;s_Anaerofilum sp. An201
ERR11473358_NODE_44_curated_complete	ERR11473358_NODE_44_curated_complete_296	419	NA	p_Bacillota;c_Clostridia;o_Eubacteriales;f_Oscillospiraceae;g_Ruthenibacterium;s_Ruthenibacterium lactatiformans
ERR11473358_NODE_44_curated_complete	ERR11473358_NODE_44_curated_complete_297	148	bPH_2	p_Bacillota;c_Clostridia;o_Eubacteriales;f_Eubacteriaceae;g_Eubacterium;-_unclassified Eubacterium;s_Eubacterium sp.
ERR11473358_NODE_44_curated_complete	ERR11473358_NODE_44_curated_complete_299	276	Sortase	p_Bacillota;c_Clostridia;o_Eubacteriales;f_Acutalibacteraceae;g_Anaeromassilibacillus;-_unclassified Anaeromassilibacillus;s_Anaeromassilibacillus sp. An172
ERR11473358_NODE_44_curated_complete	ERR11473358_NODE_44_curated_complete_303	124	NA	p_Bacillota;c_Clostridia;o_Eubacteriales;-_Eubacteriales incertae sedis;g_Flintibacter;s_Flintibacter faecis
ERR11473358_NODE_44_curated_complete	ERR11473358_NODE_44_curated_complete_308	565	SBP_bac_11 + VWA	p_Bacillota;c_Clostridia;o_Lachnospirales;f_Lachnospiraceae;-_unclassified Lachnospiraceae;s_Lachnospiraceae bacterium
ERR11473358_NODE_44_curated_complete	ERR11473358_NODE_44_curated_complete_314	389	OrfB_IS605 + OrfB_Zn_ribbon	p_Bacillota;c_Clostridia;o_Lachnospirales;f_Lachnospiraceae;g_Lachnospira;s_Lachnospira multipara
ERR11473358_NODE_44_curated_complete	ERR11473358_NODE_44_curated_complete_315	93	NA	p_Bacillota;c_Clostridia;o_Eubacteriales;-_unclassified Eubacteriales;s_Clostridiales bacterium
ERR11473358_NODE_44_curated_complete	ERR11473358_NODE_44_curated_complete_317	620	AAA-ATPase_like + PDDEXK_9	p_Bacillota;c_Clostridia;o_Eubacteriales;f_Clostridiaceae;g_Clostridium;-_environmental samples;s_uncultured Clostridium sp.
ERR11473358_NODE_44_curated_complete	ERR11473358_NODE_44_curated_complete_319	710	NA	p_Bacillota;c_Clostridia;o_Eubacteriales;-_unclassified Eubacteriales;s_Clostridiales bacterium
ERR11473358_NODE_44_curated_complete	ERR11473358_NODE_44_curated_complete_321	191	HTH_3	p_Bacillota;c_Bacilli;o_Lactobacillales;f_Lactobacillaceae;g_Lentilactobacillus;s_Lentilactobacillus otakiensis;-_Lentilactobacillus otakiensis DSM 19908 = JCM 15040
ERR11473358_NODE_44_curated_complete	ERR11473358_NODE_44_curated_complete_326	139	NA	p_Bacillota;c_Clostridia;o_Peptostreptococcales;f_Natronincolaceae;g_Alkaliphilus;-_unclassified Alkaliphilus;s_Alkaliphilus sp. B6464
ERR11473358_NODE_44_curated_complete	ERR11473358_NODE_44_curated_complete_327	112	NA	p_Bacillota;c_Bacilli;o_Bacillales;f_Bacillaceae;g_Sediminibacillus;s_Sediminibacillus halophilus
ERR11473358_NODE_44_curated_complete	ERR11473358_NODE_44_curated_complete_329	215	AAA_33	p_Bacillota;c_Clostridia;o_Lachnospirales;f_Lachnospiraceae;g_Agathobacter;s_Agathobacter rectalis
ERR11473358_NODE_44_curated_complete	ERR11473358_NODE_44_curated_complete_330	313	NA	p_Bacillota;c_Clostridia;o_Eubacteriales;f_Oscillospiraceae;g_Subdoligranulum;-_unclassified Subdoligranulum;s_Subdoligranulum sp. APC924/74
ERR11473358_NODE_44_curated_complete	ERR11473358_NODE_44_curated_complete_331	219	RloB	p_Bacillota;c_Clostridia;o_Eubacteriales;f_Eubacteriaceae;g_Eubacterium;-_unclassified Eubacterium (in: firmicutes);s_Eubacterium sp. CAG:115
ERR11473358_NODE_44_curated_complete	ERR11473358_NODE_44_curated_complete_332	433	AAA_21	p_Bacillota;c_Clostridia;o_Lachnospirales;f_Lachnospiraceae;g_Roseburia;s_Roseburia inulinivorans
ERR11473358_NODE_44_curated_complete	ERR11473358_NODE_44_curated_complete_336	155	NA	p_Bacillota;c_Clostridia;o_Eubacteriales;f_Oscillospiraceae;g_Subdoligranulum;-_unclassified Subdoligranulum;s_Subdoligranulum sp.
ERR11473358_NODE_44_curated_complete	ERR11473358_NODE_44_curated_complete_337	177	NA	p_Bacillota;c_Clostridia;o_Eubacteriales;f_Oscillospiraceae;g_Acetivibrio;s_Acetivibrio ethanolgignens
ERR11473358_NODE_44_curated_complete	ERR11473358_NODE_44_curated_complete_338	463	PcfJ	p_Bacillota;c_Bacilli;o_Lactobacillales;f_Aerococcaceae;g_Aerococcus;s_Aerococcus christensenii
ERR11473358_NODE_44_curated_complete	ERR11473358_NODE_44_curated_complete_339	287	NA	p_Bacillota;c_Clostridia;o_Eubacteriales;f_Oscillospiraceae;g_Fumia;s_Fumia xinanensis
ERR11473358_NODE_44_curated_complete	ERR11473358_NODE_44_curated_complete_340	211	NA	p_Bacillota;-_unclassified Bacillota;s_Firmicutes bacterium CAG:124
ERR11473358_NODE_44_curated_complete	ERR11473358_NODE_44_curated_complete_341	421	Big_2 + Big_2	p_Bacillota;c_Tissierellia;-_Tissierellia incertae sedis;g_Ezakiella;s_Ezakiella coagulans
ERR11473358_NODE_44_curated_complete	ERR11473358_NODE_44_curated_complete_346	469	PIN_4 + PhoH	p_Bacillota;c_Clostridia;o_Lachnospirales;f_Lachnospiraceae;g_Kineothrix;s_Kineothrix alysoides
ERR11473358_NODE_44_curated_complete	ERR11473358_NODE_44_curated_complete_347	206	Metallophos	p_Bacillota;c_Clostridia;o_Eubacteriales;-_unclassified Eubacteriales;s_Clostridiales bacterium
ERR11473358_NODE_44_curated_complete	ERR11473358_NODE_44_curated_complete_351	157	NA	p_Bacillota;c_Clostridia;o_Lachnospirales;f_Lachnospiraceae;g_Anaerocolumna;s_Anaerocolumna xylanovorans;-_Anaerocolumna xylanovorans DSM 12503
ERR11473358_NODE_44_curated_complete	ERR11473358_NODE_44_curated_complete_352	96	NA	p_Bacillota;c_Clostridia;o_Eubacteriales;f_Clostridiaceae;g_Clostridium;-_environmental samples;s_uncultured Clostridium sp.
ERR11473358_NODE_44_curated_complete	ERR11473358_NODE_44_curated_complete_353	390	HipA_C	p_Bacillota;c_Clostridia;o_Eubacteriales;-_Eubacteriales incertae sedis;g_Gemmiger;s_Gemmiger formicilis
ERR11473358_NODE_44_curated_complete	ERR11473358_NODE_44_curated_complete_356	305	DUF2263	p_Bacillota;c_Clostridia;o_Eubacteriales;f_Oscillospiraceae;g_Faecalibacterium;s_Faecalibacterium prausnitzii
ERR11473358_NODE_44_curated_complete	ERR11473358_NODE_44_curated_complete_357	143	NA	p_Bacillota;c_Clostridia;o_Lachnospirales;f_Lachnospiraceae;g_Blautia;-_unclassified Blautia;s_Blautia sp. An249
ERR11473358_NODE_44_curated_complete	ERR11473358_NODE_44_curated_complete_358	466	RRXRR	p_Bacillota;c_Clostridia;o_Lachnospirales;f_Lachnospiraceae;g_Blautia;-_unclassified Blautia;s_Blautia sp. BCRC 81119
ERR11473358_NODE_44_curated_complete	ERR11473358_NODE_44_curated_complete_361	250	NA	p_Bacillota;c_Clostridia;o_Eubacteriales;f_Clostridiaceae;g_Clostridium;-_unclassified Clostridium;s_Clostridium sp. CAG:413
ERR11473358_NODE_44_curated_complete	ERR11473358_NODE_44_curated_complete_364	126	NA	p_Bacillota;c_Clostridia;o_Eubacteriales;f_Oscillospiraceae;g_Faecalibacterium;s_Faecalibacterium prausnitzii
ERR11473358_NODE_44_curated_complete	ERR11473358_NODE_44_curated_complete_367	74	HTH_3	p_Bacillota;-_unclassified Bacillota;s_Bacillota bacterium
ERR11473975_NODE_51_curated_circular_prophage_removed	ERR11473975_NODE_51_curated_circular_prophage_removed_1	156	Cna_B	p_Bacillota;c_Bacilli;o_Lactobacillales;f_Carnobacteriaceae;-_unclassified Carnobacteriaceae;s_Carnobacteriaceae bacterium zg-84
ERR11473975_NODE_51_curated_circular_prophage_removed	ERR11473975_NODE_51_curated_circular_prophage_removed_2	300	DnaB_2 + DnaB_2	p_Bacillota;c_Clostridia;o_Eubacteriales;-_Eubacteriales incertae sedis;g_Gemmiger;s_Gemmiger formicilis
ERR11473975_NODE_51_curated_circular_prophage_removed	ERR11473975_NODE_51_curated_circular_prophage_removed_3	324	IstB_IS21	p_Bacillota;c_Clostridia;o_Eubacteriales;-_Eubacteriales incertae sedis;g_Gemmiger;s_Gemmiger formicilis
ERR11473975_NODE_51_curated_circular_prophage_removed	ERR11473975_NODE_51_curated_circular_prophage_removed_4	114	Penicillinase_R	p_Bacillota;c_Clostridia;o_Eubacteriales;f_Oscillospiraceae;g_Subdoligranulum;-_unclassified Subdoligranulum;s_Subdoligranulum sp.
ERR11473975_NODE_51_curated_circular_prophage_removed	ERR11473975_NODE_51_curated_circular_prophage_removed_6	775	HHH_4 + AAA_30 + SH3_13 + UvrD_C_2	p_Bacillota;-_environmental samples;s_uncultured Firmicutes bacterium
ERR11473975_NODE_51_curated_circular_prophage_removed	ERR11473975_NODE_51_curated_circular_prophage_removed_8	360	ParBc	p_Bacillota;c_Clostridia;-_unclassified Clostridia;s_Clostridia bacterium
ERR11473975_NODE_51_curated_circular_prophage_removed	ERR11473975_NODE_51_curated_circular_prophage_removed_14	149	NA	p_Bacillota;c_Clostridia;o_Lachnospirales;f_Lachnospiraceae;g_Blautia;-_environmental samples;s_uncultured Blautia sp.
ERR11473975_NODE_51_curated_circular_prophage_removed	ERR11473975_NODE_51_curated_circular_prophage_removed_16	715	UvrD-helicase + UvrD_C	p_Bacillota;c_Clostridia;o_Eubacteriales;-_Eubacteriales incertae sedis;g_Gemmiger;-_unclassified Gemmiger;s_Gemmiger sp. An194
ERR11473975_NODE_51_curated_circular_prophage_removed	ERR11473975_NODE_51_curated_circular_prophage_removed_17	178	DUF1064	p_Bacillota;c_Clostridia;o_Eubacteriales;f_Oscillospiraceae;g_Anaerofilum;-_unclassified Anaerofilum;s_Anaerofilum sp. An201
ERR11473975_NODE_51_curated_circular_prophage_removed	ERR11473975_NODE_51_curated_circular_prophage_removed_18	251	Glyco_tran_WecB	p_Bacillota;c_Clostridia;o_Lachnospirales;f_Lachnospiraceae;g_Blautia;-_unclassified Blautia;s_Blautia sp. AM28-10
ERR11473975_NODE_51_curated_circular_prophage_removed	ERR11473975_NODE_51_curated_circular_prophage_removed_22	458	PolyA_pol + tRNA_NucTran2_2	p_Bacillota;c_Clostridia;o_Eubacteriales;f_Oscillospiraceae;g_Anaerofilum;-_unclassified Anaerofilum;s_Anaerofilum sp. An201
ERR11473975_NODE_51_curated_circular_prophage_removed	ERR11473975_NODE_51_curated_circular_prophage_removed_26	347	RlaP	p_Bacillota;c_Clostridia;o_Eubacteriales;f_Oscillospiraceae;g_Ruminococcus;s_Ruminococcus callidus;-_Ruminococcus callidus ATCC 27760
ERR11473975_NODE_51_curated_circular_prophage_removed	ERR11473975_NODE_51_curated_circular_prophage_removed_28	734	ResIII	p_Bacillota;c_Clostridia;o_Eubacteriales;f_Oscillospiraceae;g_Ruminococcus;-_unclassified Ruminococcus;s_Ruminococcus sp. AF31-8BH
ERR11473975_NODE_51_curated_circular_prophage_removed	ERR11473975_NODE_51_curated_circular_prophage_removed_31	312	Cas_Cas7	p_Bacillota;c_Clostridia;o_Eubacteriales;f_Eubacteriaceae;g_Eubacterium;-_unclassified Eubacterium (in: firmicutes);s_Eubacterium sp. An3
ERR11473975_NODE_51_curated_circular_prophage_removed	ERR11473975_NODE_51_curated_circular_prophage_removed_36	308	Transglut_core	p_Bacillota;c_Clostridia;o_Eubacteriales;f_Oscillospiraceae;g_Ruminococcus;-_unclassified Ruminococcus;s_Ruminococcus sp. CAG:330
ERR11473975_NODE_51_curated_circular_prophage_removed	ERR11473975_NODE_51_curated_circular_prophage_removed_38	100	NA	p_Bacillota;c_Clostridia;o_Eubacteriales;f_Oscillospiraceae;g_Anaerofilum;-_unclassified Anaerofilum;s_Anaerofilum sp. An201
ERR11473975_NODE_51_curated_circular_prophage_removed	ERR11473975_NODE_51_curated_circular_prophage_removed_39	238	NA	p_Bacillota;c_Clostridia;o_Eubacteriales;-_unclassified Eubacteriales;s_Clostridiales bacterium
ERR11473975_NODE_51_curated_circular_prophage_removed	ERR11473975_NODE_51_curated_circular_prophage_removed_41	259	DUF262	p_Bacillota;c_Clostridia;o_Eubacteriales;f_Oscillospiraceae;g_Anaerofilum;-_unclassified Anaerofilum;s_Anaerofilum sp. An201
ERR11473975_NODE_51_curated_circular_prophage_removed	ERR11473975_NODE_51_curated_circular_prophage_removed_45	186	Zeta_toxin	p_Bacillota;-_unclassified Bacillota;s_Bacillota bacterium
ERR11473975_NODE_51_curated_circular_prophage_removed	ERR11473975_NODE_51_curated_circular_prophage_removed_48	267	NA	p_Bacillota;c_Clostridia;o_Lachnospirales;f_Lachnospiraceae;g_Candidatus Epulonipiscium;-_unclassified Candidatus Epulonipiscium;s_Candidatus Epulonipiscium sp.
ERR11473975_NODE_51_curated_circular_prophage_removed	ERR11473975_NODE_51_curated_circular_prophage_removed_51	334	NA	p_Bacillota;c_Clostridia;o_Lachnospirales;f_Lachnospiraceae;-_unclassified Lachnospiraceae;s_Lachnospiraceae bacterium MD335
ERR11473975_NODE_51_curated_circular_prophage_removed	ERR11473975_NODE_51_curated_circular_prophage_removed_53	192	NT5C	p_Bacillota;c_Clostridia;o_Eubacteriales;f_Desulfitobacteriaceae;g_Desulfitobacterium;s_Desulfitobacterium chlororespirans;-_Desulfitobacterium chlororespirans DSM 11544
ERR11473975_NODE_51_curated_circular_prophage_removed	ERR11473975_NODE_51_curated_circular_prophage_removed_54	116	NA	p_Bacillota;c_Clostridia;o_Eubacteriales;f_Acutalibacteraceae;g_Anaeromassilibacillus;-_unclassified Anaeromassilibacillus;s_Anaeromassilibacillus sp. An250
ERR11473975_NODE_51_curated_circular_prophage_removed	ERR11473975_NODE_51_curated_circular_prophage_removed_55	72	DUF4314	p_Bacillota;c_Erysipelotrichia;o_Erysipelotrichales;f_Erysipelotrichaceae;-_unclassified Erysipelotrichaceae;s_Erysipelotrichaceae bacterium MTC7
ERR11473975_NODE_51_curated_circular_prophage_removed	ERR11473975_NODE_51_curated_circular_prophage_removed_57	282	NA	p_Bacillota;c_Erysipelotrichia;o_Erysipelotrichales;f_Erysipelotrichaceae;g_Massilimicrobiota;-_unclassified Massilimicrobiota;s_Massilimicrobiota sp. An142
ERR11473975_NODE_51_curated_circular_prophage_removed	ERR11473975_NODE_51_curated_circular_prophage_removed_62	283	TraX	p_Bacillota;c_Clostridia;o_Lachnospirales;f_Lachnospiraceae;g_Blautia;s_Blautia hydrogenotrophica;-_Blautia hydrogenotrophica DSM 10507
ERR11473975_NODE_51_curated_circular_prophage_removed	ERR11473975_NODE_51_curated_circular_prophage_removed_63	256	Bro-N + ANT	p_Bacillota;c_Bacilli;o_Bacillales;f_Bacillaceae;g_Geobacillus;-_unclassified Geobacillus;s_Geobacillus sp. PA-3
ERR11473975_NODE_51_curated_circular_prophage_removed	ERR11473975_NODE_51_curated_circular_prophage_removed_66	142	NA	p_Bacillota;c_Clostridia;o_Eubacteriales;f_Oscillospiraceae;g_Anaerofilum;-_unclassified Anaerofilum;s_Anaerofilum sp. An201
ERR11473975_NODE_51_curated_circular_prophage_removed	ERR11473975_NODE_51_curated_circular_prophage_removed_68	220	NA	p_Bacillota;c_Erysipelotrichia;o_Erysipelotrichales;f_Erysipelotrichaceae;-_unclassified Erysipelotrichaceae;s_Erysipelotrichaceae bacterium
ERR11473975_NODE_51_curated_circular_prophage_removed	ERR11473975_NODE_51_curated_circular_prophage_removed_73	405	Big_2 + Big_2 + Big_2 + zf-C2H2_10	p_Bacillota;c_Clostridia;o_Eubacteriales;-_Eubacteriales incertae sedis;g_Gemmiger;s_Gemmiger formicilis
ERR11473975_NODE_51_curated_circular_prophage_removed	ERR11473975_NODE_51_curated_circular_prophage_removed_74	139	Y1_Tnp	p_Bacillota;c_Clostridia;o_Eubacteriales;f_Eubacteriaceae;g_Eubacterium;-_unclassified Eubacterium (in: firmicutes);s_Eubacterium sp. An3
ERR11473975_NODE_51_curated_circular_prophage_removed	ERR11473975_NODE_51_curated_circular_prophage_removed_75	382	HTH_OrfB_IS605 + OrfB_IS605 + OrfB_Zn_ribbon	p_Bacillota;c_Clostridia;o_Eubacteriales;f_Desulfitobacteriaceae;g_Desulfosporosinus;s_Desulfosporosinus acididurans
ERR11473975_NODE_51_curated_circular_prophage_removed	ERR11473975_NODE_51_curated_circular_prophage_removed_76	7325	MBG_2 + MBG_2 + MBG_2 + MBG_2 + MBG_2 + MBG_2 + MBG_2 + DUF11 + DUF11 + DUF11 + DUF11 + DUF11 + DUF11 + DUF11 + DUF11 + DUF11 + DUF11 + DUF11 + DUF11 + DUF11 + DUF11	p_Bacillota;c_Clostridia;o_Eubacteriales;f_Oscillospiraceae;g_Ruthenibacterium;s_Ruthenibacterium lactatiformans
ERR11473975_NODE_51_curated_circular_prophage_removed	ERR11473975_NODE_51_curated_circular_prophage_removed_82	512	Band_7 + Flot	p_Bacillota;c_Clostridia;o_Eubacteriales;f_Oscillospiraceae;g_Subdoligranulum;-_unclassified Subdoligranulum;s_Subdoligranulum sp.
ERR11473975_NODE_51_curated_circular_prophage_removed	ERR11473975_NODE_51_curated_circular_prophage_removed_90	320	StbA	p_Bacillota;c_Clostridia;o_Eubacteriales;f_Oscillospiraceae;g_Ruthenibacterium;s_Ruthenibacterium lactatiformans
ERR11473975_NODE_51_curated_circular_prophage_removed	ERR11473975_NODE_51_curated_circular_prophage_removed_94	354	NA	p_Bacillota;c_Clostridia;o_Eubacteriales;f_Oscillospiraceae;g_Anaerofilum;-_unclassified Anaerofilum;s_Anaerofilum sp. An201
ERR11473975_NODE_51_curated_circular_prophage_removed	ERR11473975_NODE_51_curated_circular_prophage_removed_102	226	zf-trcl + zf-trcl	p_Bacillota;c_Clostridia;o_Eubacteriales;f_Clostridiaceae;g_Clostridium;s_Clostridium grantii;-_Clostridium grantii DSM 8605
ERR11473975_NODE_51_curated_circular_prophage_removed	ERR11473975_NODE_51_curated_circular_prophage_removed_104	447	SecY	p_Bacillota;c_Clostridia;o_Eubacteriales;f_Oscillospiraceae;g_Faecalibacterium;-_unclassified Faecalibacterium;s_Faecalibacterium sp. An58
ERR11473975_NODE_51_curated_circular_prophage_removed	ERR11473975_NODE_51_curated_circular_prophage_removed_107	388	FKBP_C	p_Bacillota;c_Clostridia;o_Eubacteriales;f_Oscillospiraceae;g_Faecalibacterium;s_Faecalibacterium prausnitzii
ERR11473975_NODE_51_curated_circular_prophage_removed	ERR11473975_NODE_51_curated_circular_prophage_removed_108	324	Sortase	p_Bacillota;c_Bacilli;o_Lactobacillales;f_Streptococcaceae;g_Streptococcus;-_unclassified Streptococcus;s_Streptococcus sp. DAT741
ERR11473975_NODE_51_curated_circular_prophage_removed	ERR11473975_NODE_51_curated_circular_prophage_removed_116	180	NA	p_Bacillota;c_Clostridia;o_Eubacteriales;f_Clostridiaceae;g_Clostridium;-_unclassified Clostridium;s_Clostridium sp. AF50-3
ERR11473975_NODE_51_curated_circular_prophage_removed	ERR11473975_NODE_51_curated_circular_prophage_removed_117	74	DUF4314	p_Bacillota;c_Clostridia;o_Lachnospirales;f_Lachnospiraceae;-_unclassified Lachnospiraceae;s_Lachnospiraceae bacterium 10-1
ERR11473975_NODE_51_curated_circular_prophage_removed	ERR11473975_NODE_51_curated_circular_prophage_removed_119	247	NA	p_Bacillota;c_Clostridia;o_Eubacteriales;-_unclassified Eubacteriales;s_Clostridiales bacterium
ERR11473975_NODE_51_curated_circular_prophage_removed	ERR11473975_NODE_51_curated_circular_prophage_removed_122	266	DUF1281_C	p_Bacillota;c_Clostridia;o_Eubacteriales;f_Oscillospiraceae;-_unclassified Oscillospiraceae;s_Ruminococcaceae bacterium FB2012
ERR11473975_NODE_51_curated_circular_prophage_removed	ERR11473975_NODE_51_curated_circular_prophage_removed_123	358	NA	p_Bacillota;c_Clostridia;o_Eubacteriales;f_Oscillospiraceae;g_Anaerofilum;-_unclassified Anaerofilum;s_Anaerofilum sp. An201
ERR11473975_NODE_51_curated_circular_prophage_removed	ERR11473975_NODE_51_curated_circular_prophage_removed_125	182	NA	p_Bacillota;c_Clostridia;o_Eubacteriales;f_Oscillospiraceae;g_Ruthenibacterium;s_Ruthenibacterium lactatiformans
ERR11473975_NODE_51_curated_circular_prophage_removed	ERR11473975_NODE_51_curated_circular_prophage_removed_128	292	Endonuclea_NS_2	p_Bacillota;c_Clostridia;o_Eubacteriales;f_Clostridiaceae;g_Clostridium;-_unclassified Clostridium;s_Clostridium sp. AF27-2AA
ERR11473975_NODE_51_curated_circular_prophage_removed	ERR11473975_NODE_51_curated_circular_prophage_removed_130	151	HNH	p_Bacillota;c_Clostridia;o_Eubacteriales;f_Oscillospiraceae;g_Ruthenibacterium;s_Ruthenibacterium lactatiformans
ERR11473975_NODE_51_curated_circular_prophage_removed	ERR11473975_NODE_51_curated_circular_prophage_removed_132	649	NA	p_Bacillota;c_Clostridia;o_Lachnospirales;f_Lachnospiraceae;g_Enterocloster;s_Enterocloster bolteae;-_Enterocloster bolteae ATCC BAA-613
ERR11473975_NODE_51_curated_circular_prophage_removed	ERR11473975_NODE_51_curated_circular_prophage_removed_136	499	NA	p_Bacillota;c_Negativicutes;o_Veillonellales;f_Veillonellaceae;g_Dialister;s_Dialister hominis
ERR11473975_NODE_51_curated_circular_prophage_removed	ERR11473975_NODE_51_curated_circular_prophage_removed_138	548	NA	p_Bacillota;c_Clostridia;o_Eubacteriales;f_Eubacteriaceae;g_Eubacterium;-_unclassified Eubacterium (in: firmicutes);s_Eubacterium sp. OM08-24
ERR11473975_NODE_51_curated_circular_prophage_removed	ERR11473975_NODE_51_curated_circular_prophage_removed_139	237	NA	p_Bacillota;c_Clostridia;o_Eubacteriales;f_Eubacteriaceae;g_Eubacterium;-_unclassified Eubacterium (in: firmicutes);s_Eubacterium sp. OM08-24
ERR11473975_NODE_51_curated_circular_prophage_removed	ERR11473975_NODE_51_curated_circular_prophage_removed_140	555	NA	p_Bacillota;c_Clostridia;o_Lachnospirales;f_Lachnospiraceae;g_Acetatifactor;s_Acetatifactor muris
ERR11473975_NODE_51_curated_circular_prophage_removed	ERR11473975_NODE_51_curated_circular_prophage_removed_144	164	NA	p_Bacillota;c_Clostridia;o_Eubacteriales;f_Oscillospiraceae;g_Faecalibacterium;-_unclassified Faecalibacterium;s_Faecalibacterium sp.
ERR11473975_NODE_51_curated_circular_prophage_removed	ERR11473975_NODE_51_curated_circular_prophage_removed_149	51	NA	p_Bacillota;c_Clostridia;o_Eubacteriales;f_Oscillospiraceae;g_Subdoligranulum;s_Subdoligranulum variabile
ERR11473975_NODE_51_curated_circular_prophage_removed	ERR11473975_NODE_51_curated_circular_prophage_removed_151	460	NA	p_Bacillota;c_Clostridia;o_Eubacteriales;f_Clostridiaceae;g_Clostridium;s_Clostridium perfringens
ERR11473975_NODE_51_curated_circular_prophage_removed	ERR11473975_NODE_51_curated_circular_prophage_removed_152	141	NA	p_Bacillota;c_Clostridia;o_Lachnospirales;f_Lachnospiraceae;-_unclassified Lachnospiraceae;s_Lachnospiraceae bacterium AM48-27BH
ERR11473975_NODE_51_curated_circular_prophage_removed	ERR11473975_NODE_51_curated_circular_prophage_removed_154	741	ATP-cone + NRDD	p_Bacillota;c_Clostridia;o_Eubacteriales;f_Oscillospiraceae;g_Subdoligranulum;s_Subdoligranulum variabile;-_Subdoligranulum variabile DSM 15176
ERR11473975_NODE_51_curated_circular_prophage_removed	ERR11473975_NODE_51_curated_circular_prophage_removed_156	228	DUF4379 + DUF4379	p_Bacillota;c_Clostridia;o_Eubacteriales;f_Oscillospiraceae;g_Ruminococcus;s_Ruminococcus bromii
ERR11473975_NODE_51_curated_circular_prophage_removed	ERR11473975_NODE_51_curated_circular_prophage_removed_158	310	DUF4379 + DUF4379	p_Bacillota;c_Clostridia;o_Lachnospirales;f_Lachnospiraceae;g_Agathobacter;s_Agathobacter rectalis
ERR11473975_NODE_51_curated_circular_prophage_removed	ERR11473975_NODE_51_curated_circular_prophage_removed_160	153	DUF1768	p_Bacillota;c_Clostridia;o_Lachnospirales;f_Lachnospiraceae;g_Dorea;s_Dorea formicigenerans;-_Dorea formicigenerans ATCC 27755
ERR11473975_NODE_51_curated_circular_prophage_removed	ERR11473975_NODE_51_curated_circular_prophage_removed_162	200	NA	p_Bacillota;c_Clostridia;o_Eubacteriales;f_Oscillospiraceae;g_Anaerofilum;-_unclassified Anaerofilum;s_Anaerofilum sp. An201
ERR11473975_NODE_51_curated_circular_prophage_removed	ERR11473975_NODE_51_curated_circular_prophage_removed_163	69	NA	p_Bacillota;c_Clostridia;o_Eubacteriales;f_Oscillospiraceae;g_Ruthenibacterium;s_Ruthenibacterium lactatiformans
ERR11473975_NODE_51_curated_circular_prophage_removed	ERR11473975_NODE_51_curated_circular_prophage_removed_164	90	NA	p_Bacillota;c_Clostridia;o_Eubacteriales;f_Oscillospiraceae;g_Anaerofilum;-_unclassified Anaerofilum;s_Anaerofilum sp. An201
ERR11473975_NODE_51_curated_circular_prophage_removed	ERR11473975_NODE_51_curated_circular_prophage_removed_167	287	NA	p_Bacillota;c_Bacilli;o_Bacillales;f_Bacillaceae;g_Bacillus;-_unclassified Bacillus (in: firmicutes);s_Bacillus sp. MYb78
ERR11473975_NODE_51_curated_circular_prophage_removed	ERR11473975_NODE_51_curated_circular_prophage_removed_175	817	Toprim + Topoisom_bac	p_Bacillota;c_Clostridia;o_Eubacteriales;f_Oscillospiraceae;-_unclassified Oscillospiraceae;s_Oscillospiraceae bacterium
ERR11473975_NODE_51_curated_circular_prophage_removed	ERR11473975_NODE_51_curated_circular_prophage_removed_178	656	RecG_wedge + DEAD + Helicase_C	p_Bacillota;c_Clostridia;o_Eubacteriales;f_Oscillospiraceae;g_Anaerofilum;-_unclassified Anaerofilum;s_Anaerofilum sp. An201
ERR11473975_NODE_51_curated_circular_prophage_removed	ERR11473975_NODE_51_curated_circular_prophage_removed_181	895	VWA	p_Bacillota;c_Clostridia;o_Eubacteriales;f_Oscillospiraceae;g_Ruthenibacterium;s_Ruthenibacterium lactatiformans
ERR11473975_NODE_51_curated_circular_prophage_removed	ERR11473975_NODE_51_curated_circular_prophage_removed_183	110	NA	p_Bacillota;c_Clostridia;o_Eubacteriales;f_Oscillospiraceae;g_Subdoligranulum;-_unclassified Subdoligranulum;s_Subdoligranulum sp.
ERR11473975_NODE_51_curated_circular_prophage_removed	ERR11473975_NODE_51_curated_circular_prophage_removed_184	66	NA	p_Bacillota;c_Clostridia;o_Eubacteriales;f_Oscillospiraceae;g_Subdoligranulum;-_unclassified Subdoligranulum;s_Subdoligranulum sp. APC924/74
ERR11473975_NODE_51_curated_circular_prophage_removed	ERR11473975_NODE_51_curated_circular_prophage_removed_185	127	NA	p_Bacillota;c_Clostridia;o_Eubacteriales;f_Oscillospiraceae;g_Ligaoa;s_Ligaoa zhengdingensis
ERR11473975_NODE_51_curated_circular_prophage_removed	ERR11473975_NODE_51_curated_circular_prophage_removed_189	496	Rep_3	p_Bacillota;c_Clostridia;o_Eubacteriales;f_Oscillospiraceae;-_unclassified Oscillospiraceae;s_Oscillospiraceae bacterium
ERR11473975_NODE_51_curated_circular_prophage_removed	ERR11473975_NODE_51_curated_circular_prophage_removed_190	283	AAA_31	p_Bacillota;c_Clostridia;o_Eubacteriales;f_Oscillospiraceae;-_unclassified Oscillospiraceae;s_Oscillospiraceae bacterium
ERR11473975_NODE_51_curated_circular_prophage_removed	ERR11473975_NODE_51_curated_circular_prophage_removed_191	433	ParBc	p_Bacillota;c_Clostridia;o_Eubacteriales;f_Oscillospiraceae;-_unclassified Oscillospiraceae;s_Oscillospiraceae bacterium
ERR11473975_NODE_51_curated_circular_prophage_removed	ERR11473975_NODE_51_curated_circular_prophage_removed_192	170	NA	p_Bacillota;c_Clostridia;o_Eubacteriales;f_Oscillospiraceae;-_unclassified Oscillospiraceae;s_Oscillospiraceae bacterium
ERR11473975_NODE_51_curated_circular_prophage_removed	ERR11473975_NODE_51_curated_circular_prophage_removed_193	389	OrfB_IS605 + OrfB_Zn_ribbon	p_Bacillota;c_Clostridia;o_Lachnospirales;f_Lachnospiraceae;g_Lachnospira;s_Lachnospira multipara
ERR11473975_NODE_51_curated_circular_prophage_removed	ERR11473975_NODE_51_curated_circular_prophage_removed_195	172	NA	p_Bacillota;c_Bacilli;o_Bacillales;f_Paenibacillaceae;g_Paenibacillus;s_Paenibacillus peoriae
ERR11473975_NODE_51_curated_circular_prophage_removed	ERR11473975_NODE_51_curated_circular_prophage_removed_203	177	NT5C	p_Bacillota;c_Clostridia;o_Lachnospirales;f_Lachnospiraceae;g_Oribacterium;-_unclassified Oribacterium;s_Oribacterium sp. KHPX15
ERR11473975_NODE_51_curated_circular_prophage_removed	ERR11473975_NODE_51_curated_circular_prophage_removed_209	408	DUF3854	p_Bacillota;c_Erysipelotrichia;o_Erysipelotrichales;f_Erysipelotrichaceae;g_Stecheria;s_Stecheria intestinalis
ERR11473975_NODE_51_curated_circular_prophage_removed	ERR11473975_NODE_51_curated_circular_prophage_removed_211	338	NA	p_Bacillota;c_Clostridia;o_Eubacteriales;f_Oscillospiraceae;g_Ruthenibacterium;s_Ruthenibacterium lactatiformans
ERR11473975_NODE_51_curated_circular_prophage_removed	ERR11473975_NODE_51_curated_circular_prophage_removed_214	187	Peptidase_S24	p_Bacillota;c_Clostridia;o_Eubacteriales;f_Oscillospiraceae;g_Anaerofilum;-_unclassified Anaerofilum;s_Anaerofilum sp. An201
ERR11473975_NODE_51_curated_circular_prophage_removed	ERR11473975_NODE_51_curated_circular_prophage_removed_216	101	NA	p_Bacillota;c_Clostridia;o_Eubacteriales;-_unclassified Eubacteriales;s_Clostridiales bacterium
ERR11473975_NODE_51_curated_circular_prophage_removed	ERR11473975_NODE_51_curated_circular_prophage_removed_220	414	YqaJ	p_Bacillota;c_Clostridia;o_Eubacteriales;f_Oscillospiraceae;g_Ruthenibacterium;s_Ruthenibacterium lactatiformans
ERR11473975_NODE_51_curated_circular_prophage_removed	ERR11473975_NODE_51_curated_circular_prophage_removed_223	766	HHH_4 + AAA_30 + SH3_13 + UvrD_C_2	p_Bacillota;c_Clostridia;o_Eubacteriales;f_Oscillospiraceae;g_Anaerofilum;-_unclassified Anaerofilum;s_Anaerofilum sp. An201
ERR11473975_NODE_51_curated_circular_prophage_removed	ERR11473975_NODE_51_curated_circular_prophage_removed_225	1336	NA	p_Bacillota;c_Clostridia;o_Eubacteriales;f_Oscillospiraceae;g_Ruthenibacterium;s_Ruthenibacterium lactatiformans
ERR11473975_NODE_51_curated_circular_prophage_removed	ERR11473975_NODE_51_curated_circular_prophage_removed_228	290	N6_N4_Mtase	p_Bacillota;c_Clostridia;o_Lachnospirales;f_Lachnospiraceae;g_Lachnospira;s_Lachnospira eligens
ERR11473975_NODE_51_curated_circular_prophage_removed	ERR11473975_NODE_51_curated_circular_prophage_removed_232	30	NA	p_Bacillota;c_Clostridia;o_Eubacteriales;f_Eubacteriaceae;g_Eubacterium;s_Eubacterium coprostanoligenes
ERR11473975_NODE_51_curated_circular_prophage_removed	ERR11473975_NODE_51_curated_circular_prophage_removed_233	498	N6_Mtase	p_Bacillota;c_Clostridia;o_Eubacteriales;f_Clostridiaceae;g_Clostridium;s_Clostridium botulinum
ERR11473975_NODE_51_curated_circular_prophage_removed	ERR11473975_NODE_51_curated_circular_prophage_removed_235	40	NA	p_Bacillota;c_Clostridia;o_Lachnospirales;f_Lachnospiraceae;g_Butyrivibrio;-_unclassified Butyrivibrio;s_Butyrivibrio sp. INlla21
ERR11473975_NODE_51_curated_circular_prophage_removed	ERR11473975_NODE_51_curated_circular_prophage_removed_236	95	EcoRI_methylase	p_Bacillota;c_Clostridia;o_Thermoanaerobacterales;-_unclassified Thermoanaerobacterales;s_Thermoanaerobacterales bacterium
ERR11473975_NODE_51_curated_circular_prophage_removed	ERR11473975_NODE_51_curated_circular_prophage_removed_242	787	T4SS-DNA_transf + TraG-D_C	p_Bacillota;c_Clostridia;o_Eubacteriales;f_Oscillospiraceae;g_Ruthenibacterium;s_Ruthenibacterium lactatiformans
ERR11473975_NODE_51_curated_circular_prophage_removed	ERR11473975_NODE_51_curated_circular_prophage_removed_243	384	NA	p_Bacillota;c_Clostridia;o_Eubacteriales;f_Oscillospiraceae;g_Anaerofilum;-_unclassified Anaerofilum;s_Anaerofilum sp. An201
ERR11473975_NODE_51_curated_circular_prophage_removed	ERR11473975_NODE_51_curated_circular_prophage_removed_246	505	NA	p_Bacillota;c_Clostridia;o_Eubacteriales;f_Oscillospiraceae;g_Ruthenibacterium;s_Ruthenibacterium lactatiformans
ERR11473975_NODE_51_curated_circular_prophage_removed	ERR11473975_NODE_51_curated_circular_prophage_removed_247	855	NA	p_Bacillota;c_Clostridia;o_Eubacteriales;f_Oscillospiraceae;g_Anaerofilum;-_unclassified Anaerofilum;s_Anaerofilum sp. An201
ERR11473975_NODE_51_curated_circular_prophage_removed	ERR11473975_NODE_51_curated_circular_prophage_removed_250	419	NA	p_Bacillota;c_Clostridia;o_Eubacteriales;f_Oscillospiraceae;g_Ruthenibacterium;s_Ruthenibacterium lactatiformans
ERR11473975_NODE_51_curated_circular_prophage_removed	ERR11473975_NODE_51_curated_circular_prophage_removed_251	148	bPH_2	p_Bacillota;c_Clostridia;o_Eubacteriales;f_Eubacteriaceae;g_Eubacterium;-_unclassified Eubacterium;s_Eubacterium sp.
ERR11473975_NODE_51_curated_circular_prophage_removed	ERR11473975_NODE_51_curated_circular_prophage_removed_253	274	Sortase	p_Bacillota;c_Clostridia;o_Eubacteriales;f_Acutalibacteraceae;g_Anaeromassilibacillus;-_unclassified Anaeromassilibacillus;s_Anaeromassilibacillus sp. An172
ERR11473975_NODE_51_curated_circular_prophage_removed	ERR11473975_NODE_51_curated_circular_prophage_removed_257	126	NA	p_Bacillota;c_Clostridia;o_Eubacteriales;-_Eubacteriales incertae sedis;g_Flintibacter;s_Flintibacter faecis
ERR11473975_NODE_51_curated_circular_prophage_removed	ERR11473975_NODE_51_curated_circular_prophage_removed_262	565	SBP_bac_11 + VWA	p_Bacillota;c_Clostridia;o_Lachnospirales;f_Lachnospiraceae;-_unclassified Lachnospiraceae;s_Lachnospiraceae bacterium
ERR11473975_NODE_51_curated_circular_prophage_removed	ERR11473975_NODE_51_curated_circular_prophage_removed_268	240	OrfB_IS605	p_Bacillota;c_Clostridia;o_Lachnospirales;f_Lachnospiraceae;g_Roseburia;s_Roseburia intestinalis
ERR11473975_NODE_51_curated_circular_prophage_removed	ERR11473975_NODE_51_curated_circular_prophage_removed_271	93	NA	p_Bacillota;c_Clostridia;o_Eubacteriales;-_unclassified Eubacteriales;s_Clostridiales bacterium
ERR11473975_NODE_51_curated_circular_prophage_removed	ERR11473975_NODE_51_curated_circular_prophage_removed_274	789	NA	p_Bacillota;c_Clostridia;o_Eubacteriales;-_unclassified Eubacteriales;s_Clostridiales bacterium
ERR11473975_NODE_51_curated_circular_prophage_removed	ERR11473975_NODE_51_curated_circular_prophage_removed_281	139	NA	p_Bacillota;c_Clostridia;o_Peptostreptococcales;f_Natronincolaceae;g_Alkaliphilus;-_unclassified Alkaliphilus;s_Alkaliphilus sp. B6464
ERR11473975_NODE_51_curated_circular_prophage_removed	ERR11473975_NODE_51_curated_circular_prophage_removed_283	313	NA	p_Bacillota;c_Clostridia;o_Eubacteriales;f_Oscillospiraceae;g_Subdoligranulum;-_unclassified Subdoligranulum;s_Subdoligranulum sp. APC924/74
ERR11473975_NODE_51_curated_circular_prophage_removed	ERR11473975_NODE_51_curated_circular_prophage_removed_284	219	RloB	p_Bacillota;c_Clostridia;o_Eubacteriales;f_Eubacteriaceae;g_Eubacterium;-_unclassified Eubacterium (in: firmicutes);s_Eubacterium sp. CAG:115
ERR11473975_NODE_51_curated_circular_prophage_removed	ERR11473975_NODE_51_curated_circular_prophage_removed_285	433	AAA_21	p_Bacillota;c_Clostridia;o_Lachnospirales;f_Lachnospiraceae;g_Blautia;s_Blautia wexlerae
ERR11473975_NODE_51_curated_circular_prophage_removed	ERR11473975_NODE_51_curated_circular_prophage_removed_289	183	NA	p_Bacillota;c_Clostridia;o_Eubacteriales;f_Oscillospiraceae;g_Subdoligranulum;-_unclassified Subdoligranulum;s_Subdoligranulum sp.
ERR11473975_NODE_51_curated_circular_prophage_removed	ERR11473975_NODE_51_curated_circular_prophage_removed_290	177	NA	p_Bacillota;c_Clostridia;o_Eubacteriales;f_Oscillospiraceae;g_Acetivibrio;s_Acetivibrio ethanolgignens
ERR11473975_NODE_51_curated_circular_prophage_removed	ERR11473975_NODE_51_curated_circular_prophage_removed_291	463	PcfJ	p_Bacillota;c_Bacilli;o_Lactobacillales;f_Aerococcaceae;g_Aerococcus;s_Aerococcus christensenii
ERR11473975_NODE_51_curated_circular_prophage_removed	ERR11473975_NODE_51_curated_circular_prophage_removed_292	287	NA	p_Bacillota;c_Clostridia;o_Eubacteriales;f_Oscillospiraceae;g_Fumia;s_Fumia xinanensis
ERR11473975_NODE_51_curated_circular_prophage_removed	ERR11473975_NODE_51_curated_circular_prophage_removed_293	211	NA	p_Bacillota;-_unclassified Bacillota;s_Firmicutes bacterium CAG:124
ERR11473975_NODE_51_curated_circular_prophage_removed	ERR11473975_NODE_51_curated_circular_prophage_removed_294	421	Big_2 + Big_2	p_Bacillota;c_Tissierellia;-_Tissierellia incertae sedis;g_Ezakiella;s_Ezakiella coagulans
ERR11473975_NODE_51_curated_circular_prophage_removed	ERR11473975_NODE_51_curated_circular_prophage_removed_299	354	PIN_4 + PhoH	p_Bacillota;c_Clostridia;o_Eubacteriales;f_Clostridiaceae;-_unclassified Clostridiaceae;s_Clostridiaceae bacterium
ERR11473975_NODE_51_curated_circular_prophage_removed	ERR11473975_NODE_51_curated_circular_prophage_removed_300	87	PhoH	p_Bacillota;c_Clostridia;o_Lachnospirales;f_Lachnospiraceae;g_Kineothrix;s_Kineothrix alysoides
ERR11473975_NODE_51_curated_circular_prophage_removed	ERR11473975_NODE_51_curated_circular_prophage_removed_301	200	Metallophos	p_Bacillota;c_Clostridia;o_Eubacteriales;-_unclassified Eubacteriales;s_Clostridiales bacterium
ERR11473975_NODE_51_curated_circular_prophage_removed	ERR11473975_NODE_51_curated_circular_prophage_removed_302	139	Y1_Tnp	p_Bacillota;c_Clostridia;o_Eubacteriales;f_Eubacteriaceae;g_Eubacterium;-_unclassified Eubacterium (in: firmicutes);s_Eubacterium sp. An3
ERR11473975_NODE_51_curated_circular_prophage_removed	ERR11473975_NODE_51_curated_circular_prophage_removed_303	382	HTH_OrfB_IS605 + OrfB_IS605 + OrfB_Zn_ribbon	p_Bacillota;c_Clostridia;o_Eubacteriales;f_Desulfitobacteriaceae;g_Desulfosporosinus;s_Desulfosporosinus acididurans
ERR11473975_NODE_51_curated_circular_prophage_removed	ERR11473975_NODE_51_curated_circular_prophage_removed_304	96	Y1_Tnp	p_Bacillota;c_Bacilli;o_Bacillales;f_Bacillaceae;g_Bacillus;-_unclassified Bacillus (in: firmicutes);s_Bacillus sp. PGP15
ERR11473975_NODE_51_curated_circular_prophage_removed	ERR11473975_NODE_51_curated_circular_prophage_removed_305	579	NA	p_Bacillota;c_Clostridia;o_Eubacteriales;f_Oscillospiraceae;g_Subdoligranulum;-_unclassified Subdoligranulum;s_Subdoligranulum sp.
ERR11475043_NODE_132_curated_complete_prophage_removed	ERR11475043_NODE_132_curated_complete_prophage_removed_1	139	NA	p_Bacillota;c_Clostridia;o_Eubacteriales;f_Oscillospiraceae;g_Ruthenibacterium;s_Ruthenibacterium lactatiformans
ERR11475043_NODE_132_curated_complete_prophage_removed	ERR11475043_NODE_132_curated_complete_prophage_removed_2	1193	NA	p_Bacillota;c_Clostridia;o_Eubacteriales;f_Oscillospiraceae;g_Ruthenibacterium;s_Ruthenibacterium lactatiformans
ERR11475043_NODE_132_curated_complete_prophage_removed	ERR11475043_NODE_132_curated_complete_prophage_removed_5	727	T4SS-DNA_transf + T4SS-DNA_transf	p_Bacillota;c_Clostridia;o_Eubacteriales;f_Oscillospiraceae;g_Ruthenibacterium;s_Ruthenibacterium lactatiformans
ERR11475043_NODE_132_curated_complete_prophage_removed	ERR11475043_NODE_132_curated_complete_prophage_removed_6	390	NA	p_Bacillota;c_Clostridia;o_Eubacteriales;f_Oscillospiraceae;g_Ruthenibacterium;s_Ruthenibacterium lactatiformans
ERR11475043_NODE_132_curated_complete_prophage_removed	ERR11475043_NODE_132_curated_complete_prophage_removed_8	408	NA	p_Bacillota;c_Clostridia;o_Eubacteriales;f_Oscillospiraceae;g_Ruthenibacterium;s_Ruthenibacterium lactatiformans
ERR11475043_NODE_132_curated_complete_prophage_removed	ERR11475043_NODE_132_curated_complete_prophage_removed_9	897	TraG-D_C	p_Bacillota;c_Clostridia;o_Lachnospirales;f_Lachnospiraceae;g_Enterocloster;s_Enterocloster bolteae;-_Enterocloster bolteae ATCC BAA-613
ERR11475043_NODE_132_curated_complete_prophage_removed	ERR11475043_NODE_132_curated_complete_prophage_removed_10	197	NA	p_Bacillota;c_Clostridia;o_Eubacteriales;f_Oscillospiraceae;g_Ruthenibacterium;s_Ruthenibacterium lactatiformans
ERR11475043_NODE_132_curated_complete_prophage_removed	ERR11475043_NODE_132_curated_complete_prophage_removed_11	262	NA	p_Bacillota;c_Clostridia;o_Eubacteriales;f_Oscillospiraceae;g_Ruthenibacterium;s_Ruthenibacterium lactatiformans
ERR11475043_NODE_132_curated_complete_prophage_removed	ERR11475043_NODE_132_curated_complete_prophage_removed_12	450	NA	p_Bacillota;c_Clostridia;o_Eubacteriales;f_Oscillospiraceae;g_Ruthenibacterium;s_Ruthenibacterium lactatiformans
ERR11475043_NODE_132_curated_complete_prophage_removed	ERR11475043_NODE_132_curated_complete_prophage_removed_18	263	Metallophos	p_Bacillota;c_Clostridia;o_Eubacteriales;f_Oscillospiraceae;-_unclassified Oscillospiraceae;s_Oscillospiraceae bacterium
ERR11475043_NODE_132_curated_complete_prophage_removed	ERR11475043_NODE_132_curated_complete_prophage_removed_21	491	NA	p_Bacillota;c_Clostridia;o_Lachnospirales;f_Lachnospiraceae;-_unclassified Lachnospiraceae;s_Lachnospiraceae bacterium
ERR11475043_NODE_132_curated_complete_prophage_removed	ERR11475043_NODE_132_curated_complete_prophage_removed_24	120	Penicillinase_R	p_Bacillota;c_Clostridia;o_Eubacteriales;-_Eubacteriales incertae sedis;g_Gemmiger;s_Candidatus Gemmiger excrementavium
ERR11475043_NODE_132_curated_complete_prophage_removed	ERR11475043_NODE_132_curated_complete_prophage_removed_25	135	NA	p_Bacillota;c_Clostridia;o_Eubacteriales;f_Eubacteriaceae;g_Eubacterium;-_unclassified Eubacterium (in: firmicutes);s_Eubacterium sp. An3
ERR11475043_NODE_132_curated_complete_prophage_removed	ERR11475043_NODE_132_curated_complete_prophage_removed_27	131	NA	p_Bacillota;c_Clostridia;-_unclassified Clostridia;s_Clostridia bacterium
ERR11475043_NODE_132_curated_complete_prophage_removed	ERR11475043_NODE_132_curated_complete_prophage_removed_28	421	RRXRR + HNH	p_Bacillota;c_Clostridia;o_Eubacteriales;f_Butyricicoccaceae;g_Butyricicoccus;-_unclassified Butyricicoccus;s_Butyricicoccus sp. AF22-28AC
ERR11475043_NODE_132_curated_complete_prophage_removed	ERR11475043_NODE_132_curated_complete_prophage_removed_30	558	Band_7 + Flot	p_Bacillota;c_Clostridia;o_Eubacteriales;f_Oscillospiraceae;g_Subdoligranulum;-_unclassified Subdoligranulum;s_Subdoligranulum sp.
ERR11475043_NODE_132_curated_complete_prophage_removed	ERR11475043_NODE_132_curated_complete_prophage_removed_35	177	NA	p_Bacillota;c_Clostridia;o_Eubacteriales;f_Oscillospiraceae;g_Acetivibrio;s_Acetivibrio ethanolgignens
ERR11475043_NODE_132_curated_complete_prophage_removed	ERR11475043_NODE_132_curated_complete_prophage_removed_37	156	bPH_2	p_Bacillota;c_Clostridia;o_Eubacteriales;-_unclassified Eubacteriales;s_Clostridiales bacterium
ERR11475043_NODE_132_curated_complete_prophage_removed	ERR11475043_NODE_132_curated_complete_prophage_removed_40	321	CoiA	p_Bacillota;-_unclassified Bacillota;s_Bacillota bacterium
ERR11475043_NODE_132_curated_complete_prophage_removed	ERR11475043_NODE_132_curated_complete_prophage_removed_42	331	HTH_3	p_Bacillota;c_Erysipelotrichia;o_Erysipelotrichales;f_Coprobacillaceae;g_Thomasclavelia;s_Thomasclavelia ramosa
ERR11475043_NODE_132_curated_complete_prophage_removed	ERR11475043_NODE_132_curated_complete_prophage_removed_43	195	NA	p_Bacillota;c_Clostridia;o_Eubacteriales;f_Peptococcaceae;-_unclassified Peptococcaceae;s_Peptococcaceae bacterium
ERR11475043_NODE_132_curated_complete_prophage_removed	ERR11475043_NODE_132_curated_complete_prophage_removed_44	287	AbiEii	p_Bacillota;c_Clostridia;o_Lachnospirales;f_Lachnospiraceae;g_Mediterraneibacter;s_Candidatus Mediterraneibacter faecipullorum
ERR11475043_NODE_132_curated_complete_prophage_removed	ERR11475043_NODE_132_curated_complete_prophage_removed_46	493	Big_2 + Big_2 + Big_2	p_Bacillota;c_Clostridia;o_Eubacteriales;-_Eubacteriales incertae sedis;g_Gemmiger;s_Gemmiger formicilis
ERR11475043_NODE_132_curated_complete_prophage_removed	ERR11475043_NODE_132_curated_complete_prophage_removed_48	171	NA	p_Bacillota;c_Clostridia;o_Eubacteriales;f_Clostridiaceae;g_Clostridium;-_unclassified Clostridium;s_Clostridium sp. CAG:226
ERR11475043_NODE_132_curated_complete_prophage_removed	ERR11475043_NODE_132_curated_complete_prophage_removed_52	267	NA	p_Bacillota;c_Clostridia;o_Lachnospirales;f_Lachnospiraceae;g_Lachnoanaerobaculum;-_unclassified Lachnoanaerobaculum;s_Lachnoanaerobaculum sp.
ERR11475043_NODE_132_curated_complete_prophage_removed	ERR11475043_NODE_132_curated_complete_prophage_removed_59	261	NA	p_Bacillota;c_Bacilli;o_Lactobacillales;f_Streptococcaceae;g_Streptococcus;-_unclassified Streptococcus;s_Streptococcus sp.
ERR11475043_NODE_132_curated_complete_prophage_removed	ERR11475043_NODE_132_curated_complete_prophage_removed_62	219	RloB	p_Bacillota;c_Clostridia;o_Eubacteriales;f_Eubacteriaceae;g_Eubacterium;-_unclassified Eubacterium (in: firmicutes);s_Eubacterium sp. CAG:115
ERR11475043_NODE_132_curated_complete_prophage_removed	ERR11475043_NODE_132_curated_complete_prophage_removed_63	433	AAA_21	p_Bacillota;c_Clostridia;o_Lachnospirales;f_Lachnospiraceae;g_Roseburia;s_Roseburia inulinivorans
ERR11475043_NODE_132_curated_complete_prophage_removed	ERR11475043_NODE_132_curated_complete_prophage_removed_64	7704	MBG_2 + MBG_2 + MBG_2 + MBG_2 + MBG_2 + DUF11 + DUF11 + DUF11 + DUF11 + DUF11 + DUF11 + DUF11 + DUF11 + DUF11 + DUF11 + DUF11 + DUF11 + DUF11 + DUF11 + DUF11 + DUF11 + DUF11	p_Bacillota;c_Clostridia;o_Eubacteriales;f_Oscillospiraceae;g_Ruthenibacterium;s_Ruthenibacterium lactatiformans
ERR11475043_NODE_132_curated_complete_prophage_removed	ERR11475043_NODE_132_curated_complete_prophage_removed_73	447	SecY	p_Bacillota;c_Clostridia;o_Eubacteriales;f_Oscillospiraceae;g_Faecalibacterium;s_Candidatus Faecalibacterium faecigallinarum
ERR11475043_NODE_132_curated_complete_prophage_removed	ERR11475043_NODE_132_curated_complete_prophage_removed_76	391	FKBP_C + Trigger_C	p_Bacillota;c_Clostridia;o_Eubacteriales;f_Oscillospiraceae;g_Faecalibacterium;s_Faecalibacterium prausnitzii
ERR11475043_NODE_132_curated_complete_prophage_removed	ERR11475043_NODE_132_curated_complete_prophage_removed_77	329	Sortase	p_Bacillota;c_Bacilli;o_Lactobacillales;f_Streptococcaceae;g_Streptococcus;-_unclassified Streptococcus;s_Streptococcus sp. DAT741
ERR11475043_NODE_132_curated_complete_prophage_removed	ERR11475043_NODE_132_curated_complete_prophage_removed_81	195	NA	p_Bacillota;c_Clostridia;o_Eubacteriales;f_Clostridiaceae;g_Clostridium;-_unclassified Clostridium;s_Clostridium sp. BIOML-A1
ERR11475043_NODE_132_curated_complete_prophage_removed	ERR11475043_NODE_132_curated_complete_prophage_removed_82	92	NA	p_Bacillota;c_Clostridia;o_Eubacteriales;f_Desulfotomaculaceae;g_Desulfotomaculum;-_unclassified Desulfotomaculum;s_Desulfotomaculum sp. OF05-3
ERR11475043_NODE_132_curated_complete_prophage_removed	ERR11475043_NODE_132_curated_complete_prophage_removed_87	398	TPM_phosphatase	p_Bacillota;c_Clostridia;o_Lachnospirales;f_Lachnospiraceae;g_Lachnoclostridium;s_[Clostridium] fimetarium
ERR11475043_NODE_132_curated_complete_prophage_removed	ERR11475043_NODE_132_curated_complete_prophage_removed_88	271	TPM_phosphatase	p_Bacillota;c_Clostridia;o_Lachnospirales;f_Lachnospiraceae;g_Lachnoclostridium;s_[Clostridium] fimetarium
ERR11475043_NODE_132_curated_complete_prophage_removed	ERR11475043_NODE_132_curated_complete_prophage_removed_89	198	LemA	p_Bacillota;c_Clostridia;o_Lachnospirales;f_Lachnospiraceae;g_Lachnoclostridium;s_[Clostridium] fimetarium
ERR11475043_NODE_132_curated_complete_prophage_removed	ERR11475043_NODE_132_curated_complete_prophage_removed_94	326	DNA_methylase + DNA_methylase	p_Bacillota;c_Tissierellia;o_Tissierellales;f_Tissierellaceae;g_Paratissierella;s_Paratissierella segnis
ERR11475043_NODE_132_curated_complete_prophage_removed	ERR11475043_NODE_132_curated_complete_prophage_removed_95	363	DNA_methylase	p_Bacillota;c_Clostridia;o_Eubacteriales;f_Oscillospiraceae;-_unclassified Oscillospiraceae;s_Oscillospiraceae bacterium
ERR11475043_NODE_132_curated_complete_prophage_removed	ERR11475043_NODE_132_curated_complete_prophage_removed_98	208	Methylase_S	p_Bacillota;c_Clostridia;o_Eubacteriales;-_unclassified Eubacteriales;s_Clostridiales bacterium
ERR11475043_NODE_132_curated_complete_prophage_removed	ERR11475043_NODE_132_curated_complete_prophage_removed_101	193	NA	p_Bacillota;c_Clostridia;o_Lachnospirales;f_Lachnospiraceae;g_Agathobacter;s_Agathobacter rectalis
ERR11475043_NODE_132_curated_complete_prophage_removed	ERR11475043_NODE_132_curated_complete_prophage_removed_103	298	NA	p_Bacillota;c_Clostridia;o_Eubacteriales;f_Oscillospiraceae;g_Subdoligranulum;-_unclassified Subdoligranulum;s_Subdoligranulum sp. APC924/74
ERR11475043_NODE_132_curated_complete_prophage_removed	ERR11475043_NODE_132_curated_complete_prophage_removed_105	304	DUF4379 + DUF4379 + DUF4379	p_Bacillota;c_Clostridia;o_Eubacteriales;f_Oscillospiraceae;g_Ruminococcus;s_Ruminococcus bromii
ERR11475043_NODE_132_curated_complete_prophage_removed	ERR11475043_NODE_132_curated_complete_prophage_removed_106	447	DUF4379 + DUF4379 + DUF4379	p_Bacillota;c_Clostridia;o_Lachnospirales;f_Lachnospiraceae;g_Agathobacter;s_Agathobacter rectalis
ERR11475043_NODE_132_curated_complete_prophage_removed	ERR11475043_NODE_132_curated_complete_prophage_removed_110	456	Big_2 + Big_2 + CAP	p_Bacillota;c_Clostridia;o_Eubacteriales;f_Oscillospiraceae;g_Subdoligranulum;s_Subdoligranulum variabile
ERR11475043_NODE_132_curated_complete_prophage_removed	ERR11475043_NODE_132_curated_complete_prophage_removed_119	765	HD + ResIII	p_Bacillota;c_Clostridia;o_Eubacteriales;f_Clostridiaceae;g_Clostridium;-_unclassified Clostridium;s_Clostridium sp. AF21-20LB
ERR11475043_NODE_132_curated_complete_prophage_removed	ERR11475043_NODE_132_curated_complete_prophage_removed_120	241	Cas_Cas5d	p_Bacillota;c_Clostridia;o_Eubacteriales;f_Butyricicoccaceae;g_Butyricicoccus;s_Butyricicoccus porcorum
ERR11475043_NODE_132_curated_complete_prophage_removed	ERR11475043_NODE_132_curated_complete_prophage_removed_122	330	Cas_Cas7	p_Bacillota;c_Clostridia;o_Eubacteriales;f_Clostridiaceae;-_unclassified Clostridiaceae;s_Clostridiaceae bacterium
ERR11475043_NODE_132_curated_complete_prophage_removed	ERR11475043_NODE_132_curated_complete_prophage_removed_123	889	AAA_19	p_Bacillota;c_Clostridia;o_Eubacteriales;f_Oscillospiraceae;g_Ruminococcus;s_Ruminococcus bromii
ERR11475043_NODE_132_curated_complete_prophage_removed	ERR11475043_NODE_132_curated_complete_prophage_removed_129	214	NA	p_Bacillota;c_Clostridia;o_Eubacteriales;f_Oscillospiraceae;-_Oscillospiraceae incertae sedis;s_[Eubacterium] siraeum;-_[Eubacterium] siraeum 70/3
ERR11475043_NODE_132_curated_complete_prophage_removed	ERR11475043_NODE_132_curated_complete_prophage_removed_130	227	Sortase	p_Bacillota;c_Clostridia;o_Lachnospirales;f_Lachnospiraceae;-_unclassified Lachnospiraceae;s_Lachnospiraceae bacterium AM25-17
ERR11475043_NODE_132_curated_complete_prophage_removed	ERR11475043_NODE_132_curated_complete_prophage_removed_133	382	NA	p_Bacillota;c_Clostridia;o_Eubacteriales;f_Oscillospiraceae;g_Anaerofilum;-_unclassified Anaerofilum;s_Anaerofilum sp. An201
ERR11475043_NODE_132_curated_complete_prophage_removed	ERR11475043_NODE_132_curated_complete_prophage_removed_143	143	NA	p_Bacillota;c_Negativicutes;o_Selenomonadales;f_Selenomonadaceae;g_Anaerovibrio;s_Anaerovibrio slackiae
ERR11475043_NODE_132_curated_complete_prophage_removed	ERR11475043_NODE_132_curated_complete_prophage_removed_144	202	RRXRR	p_Bacillota;c_Clostridia;o_Lachnospirales;f_Lachnospiraceae;g_Blautia;-_unclassified Blautia;s_Blautia sp. BCRC 81119
ERR11475043_NODE_132_curated_complete_prophage_removed	ERR11475043_NODE_132_curated_complete_prophage_removed_145	251	NA	p_Bacillota;-_unclassified Bacillota;s_Firmicutes bacterium CAG:552_39_19
ERR11475043_NODE_132_curated_complete_prophage_removed	ERR11475043_NODE_132_curated_complete_prophage_removed_149	254	NA	p_Bacillota;c_Clostridia;o_Eubacteriales;f_Clostridiaceae;g_Clostridium;-_unclassified Clostridium;s_Clostridium sp. CAG:413
ERR11475043_NODE_132_curated_complete_prophage_removed	ERR11475043_NODE_132_curated_complete_prophage_removed_151	309	AAA_5	p_Bacillota;c_Clostridia;o_Eubacteriales;f_Oscillospiraceae;g_Anaerofilum;-_unclassified Anaerofilum;s_Anaerofilum sp. An201
ERR11475043_NODE_132_curated_complete_prophage_removed	ERR11475043_NODE_132_curated_complete_prophage_removed_152	626	VWA_CoxE	p_Bacillota;c_Clostridia;o_Eubacteriales;f_Oscillospiraceae;g_Anaerofilum;-_unclassified Anaerofilum;s_Anaerofilum sp. An201
ERR11475043_NODE_132_curated_complete_prophage_removed	ERR11475043_NODE_132_curated_complete_prophage_removed_157	244	HD_4	p_Bacillota;c_Erysipelotrichia;o_Erysipelotrichales;f_Erysipelotrichaceae;g_Absicoccus;s_Absicoccus porci
ERR11475043_NODE_132_curated_complete_prophage_removed	ERR11475043_NODE_132_curated_complete_prophage_removed_161	74	HTH_3	p_Bacillota;-_unclassified Bacillota;s_Bacillota bacterium
ERR11475043_NODE_132_curated_complete_prophage_removed	ERR11475043_NODE_132_curated_complete_prophage_removed_167	154	NA	p_Bacillota;c_Clostridia;o_Lachnospirales;f_Lachnospiraceae;-_unclassified Lachnospiraceae;s_Lachnospiraceae bacterium M18-1
ERR11475043_NODE_132_curated_complete_prophage_removed	ERR11475043_NODE_132_curated_complete_prophage_removed_168	464	NA	p_Bacillota;c_Clostridia;o_Lachnospirales;f_Lachnospiraceae;g_Catenibacillus;s_Catenibacillus scindens
ERR11475043_NODE_132_curated_complete_prophage_removed	ERR11475043_NODE_132_curated_complete_prophage_removed_172	252	NA	p_Bacillota;c_Bacilli;o_Bacillales;f_Bacillaceae;g_Bacillus;-_unclassified Bacillus (in: firmicutes);s_Bacillus sp. TH008
ERR11475043_NODE_132_curated_complete_prophage_removed	ERR11475043_NODE_132_curated_complete_prophage_removed_178	127	NA	p_Bacillota;c_Clostridia;o_Lachnospirales;f_Lachnospiraceae;g_Lachnospira;s_Lachnospira eligens
ERR11475043_NODE_132_curated_complete_prophage_removed	ERR11475043_NODE_132_curated_complete_prophage_removed_179	176	NA	p_Bacillota;c_Clostridia;o_Eubacteriales;f_Clostridiaceae;g_Clostridium;-_unclassified Clostridium;s_Clostridium sp. AF50-3
ERR11475043_NODE_132_curated_complete_prophage_removed	ERR11475043_NODE_132_curated_complete_prophage_removed_181	334	NA	p_Bacillota;c_Clostridia;o_Lachnospirales;f_Lachnospiraceae;g_Blautia;s_Blautia obeum
ERR11475043_NODE_132_curated_complete_prophage_removed	ERR11475043_NODE_132_curated_complete_prophage_removed_182	193	NA	p_Bacillota;c_Clostridia;o_Lachnospirales;f_Lachnospiraceae;-_unclassified Lachnospiraceae;s_Lachnospiraceae bacterium M18-1
ERR11475043_NODE_132_curated_complete_prophage_removed	ERR11475043_NODE_132_curated_complete_prophage_removed_183	92	NA	p_Bacillota;c_Clostridia;o_Eubacteriales;f_Oscillospiraceae;-_unclassified Oscillospiraceae;s_Oscillospiraceae bacterium
ERR11475043_NODE_132_curated_complete_prophage_removed	ERR11475043_NODE_132_curated_complete_prophage_removed_190	238	NA	p_Bacillota;c_Erysipelotrichia;o_Erysipelotrichales;f_Erysipelotrichaceae;-_unclassified Erysipelotrichaceae;s_Erysipelotrichaceae bacterium
ERR11475043_NODE_132_curated_complete_prophage_removed	ERR11475043_NODE_132_curated_complete_prophage_removed_193	138	NA	p_Bacillota;c_Clostridia;o_Eubacteriales;f_Eubacteriaceae;g_Eubacterium;-_environmental samples;s_uncultured Eubacterium sp.
ERR11475043_NODE_132_curated_complete_prophage_removed	ERR11475043_NODE_132_curated_complete_prophage_removed_194	270	NA	p_Bacillota;c_Bacilli;o_Bacillales;f_Bacillaceae;g_Bacillus;-_Bacillus cereus group;s_Bacillus cereus
ERR11475043_NODE_132_curated_complete_prophage_removed	ERR11475043_NODE_132_curated_complete_prophage_removed_198	281	TraX	p_Bacillota;c_Clostridia;o_Eubacteriales;f_Oscillospiraceae;g_Subdoligranulum;-_unclassified Subdoligranulum;s_Subdoligranulum sp.
ERR11475043_NODE_132_curated_complete_prophage_removed	ERR11475043_NODE_132_curated_complete_prophage_removed_199	282	DUF4379 + DUF4379	p_Bacillota;c_Negativicutes;o_Selenomonadales;f_Selenomonadaceae;g_Selenomonas;s_Selenomonas ruminantium
ERR11475043_NODE_132_curated_complete_prophage_removed	ERR11475043_NODE_132_curated_complete_prophage_removed_203	528	NA	p_Bacillota;c_Bacilli;o_Bacillales;-_Bacillales incertae sedis;-_Bacillales Family XII. Incertae Sedis;g_Exiguobacterium;-_unclassified Exiguobacterium;s_Exiguobacterium sp. AT1b
ERR11475043_NODE_132_curated_complete_prophage_removed	ERR11475043_NODE_132_curated_complete_prophage_removed_204	80	DUF3791	p_Bacillota;c_Clostridia;o_Lachnospirales;f_Lachnospiraceae;-_unclassified Lachnospiraceae;s_Lachnospiraceae bacterium
ERR11475043_NODE_132_curated_complete_prophage_removed	ERR11475043_NODE_132_curated_complete_prophage_removed_211	297	Abhydrolase_3	p_Bacillota;c_Clostridia;o_Eubacteriales;-_unclassified Eubacteriales;s_Clostridiales bacterium
ERR11475043_NODE_132_curated_complete_prophage_removed	ERR11475043_NODE_132_curated_complete_prophage_removed_212	156	NA	p_Bacillota;c_Clostridia;o_Eubacteriales;f_Oscillospiraceae;g_Anaerofilum;-_unclassified Anaerofilum;s_Anaerofilum sp. An201
ERR11475043_NODE_132_curated_complete_prophage_removed	ERR11475043_NODE_132_curated_complete_prophage_removed_222	210	NA	p_Bacillota;c_Clostridia;o_Eubacteriales;-_Eubacteriales incertae sedis;g_Colidextribacter;-_unclassified Colidextribacter;s_Colidextribacter sp. OB.20
ERR11475043_NODE_132_curated_complete_prophage_removed	ERR11475043_NODE_132_curated_complete_prophage_removed_227	74	NA	p_Bacillota;c_Clostridia;o_Eubacteriales;-_unclassified Eubacteriales;s_Clostridiales bacterium
ERR11475043_NODE_132_curated_complete_prophage_removed	ERR11475043_NODE_132_curated_complete_prophage_removed_229	271	DUF262	p_Bacillota;c_Clostridia;o_Eubacteriales;f_Oscillospiraceae;g_Anaerofilum;-_unclassified Anaerofilum;s_Anaerofilum sp. An201
ERR11475043_NODE_132_curated_complete_prophage_removed	ERR11475043_NODE_132_curated_complete_prophage_removed_230	96	NA	p_Bacillota;c_Clostridia;o_Eubacteriales;-_unclassified Eubacteriales;s_Clostridiales bacterium
ERR11475043_NODE_132_curated_complete_prophage_removed	ERR11475043_NODE_132_curated_complete_prophage_removed_233	336	NA	p_Bacillota;c_Clostridia;o_Eubacteriales;-_unclassified Eubacteriales;s_Clostridiales bacterium
ERR11475043_NODE_132_curated_complete_prophage_removed	ERR11475043_NODE_132_curated_complete_prophage_removed_234	164	NA	p_Bacillota;c_Clostridia;o_Eubacteriales;-_unclassified Eubacteriales;s_Clostridiales bacterium
ERR11475043_NODE_132_curated_complete_prophage_removed	ERR11475043_NODE_132_curated_complete_prophage_removed_235	343	NA	p_Bacillota;c_Clostridia;o_Eubacteriales;-_unclassified Eubacteriales;s_Clostridiales bacterium
ERR11475043_NODE_132_curated_complete_prophage_removed	ERR11475043_NODE_132_curated_complete_prophage_removed_240	185	NA	p_Bacillota;c_Clostridia;o_Eubacteriales;f_Desulfitobacteriaceae;g_Desulfitobacterium;s_Desulfitobacterium chlororespirans;-_Desulfitobacterium chlororespirans DSM 11544
ERR11475043_NODE_132_curated_complete_prophage_removed	ERR11475043_NODE_132_curated_complete_prophage_removed_246	186	NA	p_Bacillota;-_unclassified Bacillota;s_Bacillota bacterium
ERR11475043_NODE_132_curated_complete_prophage_removed	ERR11475043_NODE_132_curated_complete_prophage_removed_247	240	N6_Mtase	p_Bacillota;c_Clostridia;o_Eubacteriales;f_Oscillospiraceae;g_Faecalibacterium;s_Faecalibacterium prausnitzii;-_Faecalibacterium prausnitzii L2-6
ERR11475043_NODE_132_curated_complete_prophage_removed	ERR11475043_NODE_132_curated_complete_prophage_removed_250	92	NA	p_Bacillota;c_Clostridia;o_Eubacteriales;f_Desulfotomaculaceae;g_Pelotomaculum;-_unclassified Pelotomaculum;s_Pelotomaculum sp. PtaB.Bin104
ERR11475043_NODE_132_curated_complete_prophage_removed	ERR11475043_NODE_132_curated_complete_prophage_removed_251	198	NA	p_Bacillota;c_Clostridia;o_Lachnospirales;f_Lachnospiraceae;g_Blautia;-_unclassified Blautia;s_Blautia sp. OM05-6
ERR11475043_NODE_132_curated_complete_prophage_removed	ERR11475043_NODE_132_curated_complete_prophage_removed_262	72	NA	p_Bacillota;c_Bacilli;o_Bacillales;f_Bacillaceae;g_Bacillus;-_Bacillus cereus group;s_Bacillus cereus
ERR11475043_NODE_132_curated_complete_prophage_removed	ERR11475043_NODE_132_curated_complete_prophage_removed_263	255	Bro-N + ANT	p_Bacillota;c_Clostridia;o_Eubacteriales;f_Oscillospiraceae;g_Ruminococcus;-_environmental samples;s_uncultured Ruminococcus sp.
ERR11475043_NODE_132_curated_complete_prophage_removed	ERR11475043_NODE_132_curated_complete_prophage_removed_266	154	NA	p_Bacillota;c_Bacilli;o_Lactobacillales;f_Enterococcaceae;g_Enterococcus;-_unclassified Enterococcus;s_Enterococcus sp.
ERR11475043_NODE_132_curated_complete_prophage_removed	ERR11475043_NODE_132_curated_complete_prophage_removed_270	741	ATP-cone + NRDD	p_Bacillota;c_Clostridia;o_Eubacteriales;f_Oscillospiraceae;g_Subdoligranulum;s_Subdoligranulum variabile;-_Subdoligranulum variabile DSM 15176
ERR11475043_NODE_132_curated_complete_prophage_removed	ERR11475043_NODE_132_curated_complete_prophage_removed_272	437	NA	p_Bacillota;c_Clostridia;o_Eubacteriales;f_Oscillospiraceae;g_Subdoligranulum;s_Subdoligranulum variabile
ERR11475043_NODE_132_curated_complete_prophage_removed	ERR11475043_NODE_132_curated_complete_prophage_removed_273	500	NA	p_Bacillota;c_Clostridia;o_Eubacteriales;f_Oscillospiraceae;g_Anaerofilum;-_unclassified Anaerofilum;s_Anaerofilum sp. An201
ERR11475043_NODE_132_curated_complete_prophage_removed	ERR11475043_NODE_132_curated_complete_prophage_removed_279	484	NYN	p_Bacillota;c_Clostridia;o_Eubacteriales;f_Oscillospiraceae;g_Brotocaccenecus;s_Brotocaccenecus cirricatena
ERR11475043_NODE_132_curated_complete_prophage_removed	ERR11475043_NODE_132_curated_complete_prophage_removed_281	827	Toprim + Topoisom_bac	p_Bacillota;-_unclassified Bacillota;s_Firmicutes bacterium CAG:449
ERR11475043_NODE_132_curated_complete_prophage_removed	ERR11475043_NODE_132_curated_complete_prophage_removed_287	191	NA	p_Bacillota;c_Clostridia;o_Eubacteriales;f_Oscillospiraceae;g_Anaerofilum;-_unclassified Anaerofilum;s_Anaerofilum sp. An201
ERR11475043_NODE_132_curated_complete_prophage_removed	ERR11475043_NODE_132_curated_complete_prophage_removed_288	69	NA	p_Bacillota;-_unclassified Bacillota;s_Firmicutes bacterium AF36-3BH
ERR11475043_NODE_132_curated_complete_prophage_removed	ERR11475043_NODE_132_curated_complete_prophage_removed_290	324	NA	p_Bacillota;c_Clostridia;o_Thermoanaerobacterales;f_Thermoanaerobacteraceae;-_unclassified Thermoanaerobacteraceae;s_Thermoanaerobacteraceae bacterium
ERR11475043_NODE_132_curated_complete_prophage_removed	ERR11475043_NODE_132_curated_complete_prophage_removed_292	734	NA	p_Bacillota;c_Clostridia;o_Lachnospirales;f_Vallitaleaceae;g_Vallitalea;s_Vallitalea pronyensis
ERR11475043_NODE_132_curated_complete_prophage_removed	ERR11475043_NODE_132_curated_complete_prophage_removed_293	111	NA	p_Bacillota;c_Clostridia;o_Eubacteriales;f_Oscillospiraceae;g_Subdoligranulum;-_unclassified Subdoligranulum;s_Subdoligranulum sp.
ERR11475043_NODE_132_curated_complete_prophage_removed	ERR11475043_NODE_132_curated_complete_prophage_removed_295	175	Dam	p_Bacillota;c_Clostridia;o_Lachnospirales;f_Lachnospiraceae;-_unclassified Lachnospiraceae;s_Lachnospiraceae bacterium TF09-5
ERR11475043_NODE_132_curated_complete_prophage_removed	ERR11475043_NODE_132_curated_complete_prophage_removed_299	320	ALP_N	p_Bacillota;c_Clostridia;o_Eubacteriales;f_Oscillospiraceae;g_Ruthenibacterium;s_Ruthenibacterium lactatiformans
ERR11475043_NODE_132_curated_complete_prophage_removed	ERR11475043_NODE_132_curated_complete_prophage_removed_300	156	NA	p_Bacillota;c_Clostridia;o_Eubacteriales;f_Oscillospiraceae;g_Ruthenibacterium;s_Ruthenibacterium lactatiformans
ERR11475043_NODE_132_curated_complete_prophage_removed	ERR11475043_NODE_132_curated_complete_prophage_removed_305	158	HNH	p_Bacillota;c_Clostridia;o_Eubacteriales;f_Oscillospiraceae;g_Ruthenibacterium;s_Ruthenibacterium lactatiformans
ERR11475043_NODE_132_curated_complete_prophage_removed	ERR11475043_NODE_132_curated_complete_prophage_removed_312	3842	SdrD_B + SdrD_B + SdrD_B + SdrD_B + SpaA + Cna_B + Cna_B + Cna_B + Cna_B + Cna_B + Cna_B + Cna_B + Cna_B + Cna_B + Cna_B + Cna_B + Cna_B + Cna_B + Cna_B + Cna_B + Cna_B + Cna_B + Cna_B + Cna_B + Cna_B + Cna_B + Cna_B + Cna_B	p_Bacillota;c_Clostridia;o_Eubacteriales;-_unclassified Eubacteriales;s_Clostridiales bacterium
ERR11475043_NODE_132_curated_complete_prophage_removed	ERR11475043_NODE_132_curated_complete_prophage_removed_313	260	SSB + SSB	p_Bacillota;c_Clostridia;o_Eubacteriales;f_Oscillospiraceae;g_Ruthenibacterium;s_Ruthenibacterium lactatiformans
ERR11475043_NODE_132_curated_complete_prophage_removed	ERR11475043_NODE_132_curated_complete_prophage_removed_314	608	NA	p_Bacillota;c_Clostridia;o_Lachnospirales;f_Lachnospiraceae;g_Hungatella;s_Hungatella hathewayi
ERR11475043_NODE_132_curated_complete_prophage_removed	ERR11475043_NODE_132_curated_complete_prophage_removed_315	160	NA	p_Bacillota;c_Clostridia;o_Eubacteriales;f_Oscillospiraceae;g_Subdoligranulum;-_unclassified Subdoligranulum;s_Subdoligranulum sp. APC924/74
ERR11475043_NODE_132_curated_complete_prophage_removed	ERR11475043_NODE_132_curated_complete_prophage_removed_316	421	ParBc	p_Bacillota;c_Clostridia;o_Eubacteriales;-_Eubacteriales incertae sedis;g_Gemmiger;s_Gemmiger formicilis
ERR11475043_NODE_132_curated_complete_prophage_removed	ERR11475043_NODE_132_curated_complete_prophage_removed_317	287	AAA_31	p_Bacillota;c_Clostridia;o_Eubacteriales;f_Oscillospiraceae;-_unclassified Oscillospiraceae;s_Oscillospiraceae bacterium
ERR11475043_NODE_132_curated_complete_prophage_removed	ERR11475043_NODE_132_curated_complete_prophage_removed_318	524	Rep_3	p_Bacillota;c_Clostridia;o_Eubacteriales;f_Oscillospiraceae;-_unclassified Oscillospiraceae;s_Oscillospiraceae bacterium
ERR11475043_NODE_132_curated_complete_prophage_removed	ERR11475043_NODE_132_curated_complete_prophage_removed_321	821	HHH_4 + AAA_30 + SH3_13 + UvrD_C_2	p_Bacillota;c_Clostridia;o_Eubacteriales;f_Oscillospiraceae;g_Ruminococcus;s_Ruminococcus albus;-_Ruminococcus albus 7 = DSM 20455
ERR11475043_NODE_132_curated_complete_prophage_removed	ERR11475043_NODE_132_curated_complete_prophage_removed_322	659	RecG_wedge + DEAD + Helicase_C	p_Bacillota;c_Clostridia;o_Eubacteriales;f_Oscillospiraceae;g_Anaerofilum;-_unclassified Anaerofilum;s_Anaerofilum sp. An201
ERR11475043_NODE_132_curated_complete_prophage_removed	ERR11475043_NODE_132_curated_complete_prophage_removed_327	190	NA	p_Bacillota;c_Clostridia;o_Eubacteriales;f_Oscillospiraceae;g_Dysosmobacter;s_Dysosmobacter segnis
ERR11475043_NODE_132_curated_complete_prophage_removed	ERR11475043_NODE_132_curated_complete_prophage_removed_330	731	NA	p_Bacillota;c_Clostridia;o_Eubacteriales;f_Oscillospiraceae;g_Ruthenibacterium;s_Ruthenibacterium lactatiformans
ERR11475043_NODE_132_curated_complete_prophage_removed	ERR11475043_NODE_132_curated_complete_prophage_removed_332	319	NA	p_Bacillota;c_Clostridia;o_Eubacteriales;f_Oscillospiraceae;g_Ruthenibacterium;s_Ruthenibacterium lactatiformans
ERR11475043_NODE_132_curated_complete_prophage_removed	ERR11475043_NODE_132_curated_complete_prophage_removed_333	400	DUF3854	p_Bacillota;c_Clostridia;o_Eubacteriales;f_Oscillospiraceae;g_Ruthenibacterium;s_Ruthenibacterium lactatiformans
ERR11475043_NODE_132_curated_complete_prophage_removed	ERR11475043_NODE_132_curated_complete_prophage_removed_334	331	NA	p_Bacillota;c_Clostridia;o_Eubacteriales;f_Oscillospiraceae;g_Ruthenibacterium;s_Ruthenibacterium lactatiformans
ERR11475043_NODE_132_curated_complete_prophage_removed	ERR11475043_NODE_132_curated_complete_prophage_removed_336	180	Peptidase_S24	p_Bacillota;c_Clostridia;o_Eubacteriales;f_Oscillospiraceae;g_Ruthenibacterium;s_Ruthenibacterium lactatiformans
ERR11475043_NODE_132_curated_complete_prophage_removed	ERR11475043_NODE_132_curated_complete_prophage_removed_337	402	NA	p_Bacillota;c_Clostridia;o_Eubacteriales;f_Oscillospiraceae;g_Ruthenibacterium;s_Ruthenibacterium lactatiformans
ERR11475043_NODE_132_curated_complete_prophage_removed	ERR11475043_NODE_132_curated_complete_prophage_removed_338	394	YqaJ	p_Bacillota;c_Clostridia;o_Eubacteriales;f_Oscillospiraceae;g_Ruthenibacterium;s_Ruthenibacterium lactatiformans
ERR11475043_NODE_132_curated_complete_prophage_removed	ERR11475043_NODE_132_curated_complete_prophage_removed_343	760	HHH_4 + AAA_30 + SH3_13 + UvrD_C_2	p_Bacillota;c_Clostridia;o_Eubacteriales;f_Oscillospiraceae;g_Ruthenibacterium;s_Ruthenibacterium lactatiformans
ERR11566171_NODE_22_curated_complete	ERR11566171_NODE_22_curated_complete_1	217	RloB	p_Bacillota;c_Clostridia;o_Eubacteriales;f_Eubacteriaceae;g_Eubacterium;-_unclassified Eubacterium (in: firmicutes);s_Eubacterium sp. CAG:115
ERR11566171_NODE_22_curated_complete	ERR11566171_NODE_22_curated_complete_2	433	AAA_21	p_Bacillota;c_Clostridia;o_Lachnospirales;f_Lachnospiraceae;g_Blautia;s_Blautia wexlerae
ERR11566171_NODE_22_curated_complete	ERR11566171_NODE_22_curated_complete_6	177	NA	p_Bacillota;c_Clostridia;o_Eubacteriales;f_Oscillospiraceae;g_Acetivibrio;s_Acetivibrio ethanolgignens
ERR11566171_NODE_22_curated_complete	ERR11566171_NODE_22_curated_complete_8	287	NA	p_Bacillota;c_Clostridia;o_Eubacteriales;f_Oscillospiraceae;g_Fumia;s_Fumia xinanensis
ERR11566171_NODE_22_curated_complete	ERR11566171_NODE_22_curated_complete_9	211	NA	p_Bacillota;-_unclassified Bacillota;s_Firmicutes bacterium CAG:124
ERR11566171_NODE_22_curated_complete	ERR11566171_NODE_22_curated_complete_15	469	PIN_4 + PhoH	p_Bacillota;c_Clostridia;o_Lachnospirales;f_Lachnospiraceae;g_Kineothrix;s_Kineothrix alysoides
ERR11566171_NODE_22_curated_complete	ERR11566171_NODE_22_curated_complete_16	206	Metallophos	p_Bacillota;c_Clostridia;o_Eubacteriales;-_unclassified Eubacteriales;s_Clostridiales bacterium
ERR11566171_NODE_22_curated_complete	ERR11566171_NODE_22_curated_complete_20	157	NA	p_Bacillota;c_Clostridia;o_Lachnospirales;f_Lachnospiraceae;g_Anaerocolumna;s_Anaerocolumna xylanovorans;-_Anaerocolumna xylanovorans DSM 12503
ERR11566171_NODE_22_curated_complete	ERR11566171_NODE_22_curated_complete_21	96	NA	p_Bacillota;c_Clostridia;o_Eubacteriales;f_Clostridiaceae;g_Clostridium;-_environmental samples;s_uncultured Clostridium sp.
ERR11566171_NODE_22_curated_complete	ERR11566171_NODE_22_curated_complete_22	390	HipA_C	p_Bacillota;c_Clostridia;o_Eubacteriales;-_Eubacteriales incertae sedis;g_Gemmiger;s_Gemmiger formicilis
ERR11566171_NODE_22_curated_complete	ERR11566171_NODE_22_curated_complete_25	305	DUF2263	p_Bacillota;c_Clostridia;o_Eubacteriales;f_Oscillospiraceae;g_Faecalibacterium;s_Faecalibacterium prausnitzii
ERR11566171_NODE_22_curated_complete	ERR11566171_NODE_22_curated_complete_26	144	NA	p_Bacillota;c_Clostridia;o_Lachnospirales;f_Lachnospiraceae;g_Blautia;-_unclassified Blautia;s_Blautia sp. An249
ERR11566171_NODE_22_curated_complete	ERR11566171_NODE_22_curated_complete_28	421	RRXRR + HNH	p_Bacillota;c_Clostridia;o_Eubacteriales;f_Butyricicoccaceae;g_Butyricicoccus;-_unclassified Butyricicoccus;s_Butyricicoccus sp. AF22-28AC
ERR11566171_NODE_22_curated_complete	ERR11566171_NODE_22_curated_complete_31	250	NA	p_Bacillota;c_Clostridia;o_Eubacteriales;f_Clostridiaceae;g_Clostridium;-_unclassified Clostridium;s_Clostridium sp. CAG:413
ERR11566171_NODE_22_curated_complete	ERR11566171_NODE_22_curated_complete_34	126	NA	p_Bacillota;c_Clostridia;o_Eubacteriales;f_Oscillospiraceae;g_Faecalibacterium;s_Faecalibacterium prausnitzii
ERR11566171_NODE_22_curated_complete	ERR11566171_NODE_22_curated_complete_37	74	HTH_3	p_Bacillota;-_unclassified Bacillota;s_Bacillota bacterium
ERR11566171_NODE_22_curated_complete	ERR11566171_NODE_22_curated_complete_41	300	DnaB_2 + DnaB_2	p_Bacillota;c_Clostridia;o_Eubacteriales;-_Eubacteriales incertae sedis;g_Gemmiger;s_Gemmiger formicilis
ERR11566171_NODE_22_curated_complete	ERR11566171_NODE_22_curated_complete_42	324	IstB_IS21	p_Bacillota;c_Clostridia;o_Eubacteriales;-_Eubacteriales incertae sedis;g_Gemmiger;s_Gemmiger formicilis
ERR11566171_NODE_22_curated_complete	ERR11566171_NODE_22_curated_complete_43	131	Penicillinase_R	p_Bacillota;c_Clostridia;o_Eubacteriales;f_Oscillospiraceae;g_Subdoligranulum;s_Subdoligranulum variabile
ERR11566171_NODE_22_curated_complete	ERR11566171_NODE_22_curated_complete_45	775	HHH_4 + AAA_30 + SH3_13 + UvrD_C_2	p_Bacillota;-_environmental samples;s_uncultured Firmicutes bacterium
ERR11566171_NODE_22_curated_complete	ERR11566171_NODE_22_curated_complete_47	360	ParBc	p_Bacillota;c_Clostridia;-_unclassified Clostridia;s_Clostridia bacterium
ERR11566171_NODE_22_curated_complete	ERR11566171_NODE_22_curated_complete_53	145	NA	p_Bacillota;c_Clostridia;o_Eubacteriales;f_Oscillospiraceae;g_Pusillibacter;s_Pusillibacter faecalis
ERR11566171_NODE_22_curated_complete	ERR11566171_NODE_22_curated_complete_55	715	UvrD-helicase + UvrD-helicase + UvrD_C	p_Bacillota;c_Clostridia;o_Eubacteriales;f_Oscillospiraceae;g_Fournierella;s_Fournierella massiliensis
ERR11566171_NODE_22_curated_complete	ERR11566171_NODE_22_curated_complete_56	178	DUF1064	p_Bacillota;c_Clostridia;o_Eubacteriales;f_Oscillospiraceae;g_Anaerofilum;-_unclassified Anaerofilum;s_Anaerofilum sp. An201
ERR11566171_NODE_22_curated_complete	ERR11566171_NODE_22_curated_complete_57	251	Glyco_tran_WecB	p_Bacillota;c_Clostridia;o_Lachnospirales;f_Lachnospiraceae;g_Blautia;-_unclassified Blautia;s_Blautia sp. AM28-10
ERR11566171_NODE_22_curated_complete	ERR11566171_NODE_22_curated_complete_61	458	PolyA_pol + tRNA_NucTran2_2	p_Bacillota;c_Clostridia;o_Eubacteriales;f_Oscillospiraceae;g_Anaerofilum;-_unclassified Anaerofilum;s_Anaerofilum sp. An201
ERR11566171_NODE_22_curated_complete	ERR11566171_NODE_22_curated_complete_65	347	RlaP	p_Bacillota;c_Clostridia;o_Eubacteriales;f_Oscillospiraceae;g_Ruminococcus;s_Ruminococcus callidus;-_Ruminococcus callidus ATCC 27760
ERR11566171_NODE_22_curated_complete	ERR11566171_NODE_22_curated_complete_67	734	ResIII	p_Bacillota;c_Clostridia;o_Eubacteriales;f_Oscillospiraceae;g_Ruminococcus;-_unclassified Ruminococcus;s_Ruminococcus sp. AF31-8BH
ERR11566171_NODE_22_curated_complete	ERR11566171_NODE_22_curated_complete_70	312	Cas_Cas7	p_Bacillota;c_Clostridia;o_Eubacteriales;f_Eubacteriaceae;g_Eubacterium;-_unclassified Eubacterium (in: firmicutes);s_Eubacterium sp. An3
ERR11566171_NODE_22_curated_complete	ERR11566171_NODE_22_curated_complete_75	308	Transglut_core	p_Bacillota;c_Clostridia;o_Eubacteriales;f_Oscillospiraceae;g_Ruminococcus;-_unclassified Ruminococcus;s_Ruminococcus sp. CAG:330
ERR11566171_NODE_22_curated_complete	ERR11566171_NODE_22_curated_complete_77	100	NA	p_Bacillota;c_Clostridia;o_Eubacteriales;f_Oscillospiraceae;g_Anaerofilum;-_unclassified Anaerofilum;s_Anaerofilum sp. An201
ERR11566171_NODE_22_curated_complete	ERR11566171_NODE_22_curated_complete_78	238	NA	p_Bacillota;c_Clostridia;o_Eubacteriales;-_unclassified Eubacteriales;s_Clostridiales bacterium
ERR11566171_NODE_22_curated_complete	ERR11566171_NODE_22_curated_complete_80	259	DUF262	p_Bacillota;c_Clostridia;o_Eubacteriales;f_Oscillospiraceae;g_Anaerofilum;-_unclassified Anaerofilum;s_Anaerofilum sp. An201
ERR11566171_NODE_22_curated_complete	ERR11566171_NODE_22_curated_complete_84	186	Zeta_toxin	p_Bacillota;-_unclassified Bacillota;s_Bacillota bacterium
ERR11566171_NODE_22_curated_complete	ERR11566171_NODE_22_curated_complete_87	267	NA	p_Bacillota;c_Clostridia;o_Lachnospirales;f_Lachnospiraceae;g_Candidatus Epulonipiscium;-_unclassified Candidatus Epulonipiscium;s_Candidatus Epulonipiscium sp.
ERR11566171_NODE_22_curated_complete	ERR11566171_NODE_22_curated_complete_91	192	NT5C	p_Bacillota;c_Clostridia;o_Eubacteriales;f_Desulfitobacteriaceae;g_Desulfitobacterium;s_Desulfitobacterium chlororespirans;-_Desulfitobacterium chlororespirans DSM 11544
ERR11566171_NODE_22_curated_complete	ERR11566171_NODE_22_curated_complete_92	116	NA	p_Bacillota;c_Clostridia;o_Eubacteriales;f_Acutalibacteraceae;g_Anaeromassilibacillus;-_unclassified Anaeromassilibacillus;s_Anaeromassilibacillus sp. An250
ERR11566171_NODE_22_curated_complete	ERR11566171_NODE_22_curated_complete_93	72	DUF4314	p_Bacillota;c_Erysipelotrichia;o_Erysipelotrichales;f_Erysipelotrichaceae;-_unclassified Erysipelotrichaceae;s_Erysipelotrichaceae bacterium MTC7
ERR11566171_NODE_22_curated_complete	ERR11566171_NODE_22_curated_complete_95	282	NA	p_Bacillota;c_Erysipelotrichia;o_Erysipelotrichales;f_Erysipelotrichaceae;g_Massilimicrobiota;-_unclassified Massilimicrobiota;s_Massilimicrobiota sp. An142
ERR11566171_NODE_22_curated_complete	ERR11566171_NODE_22_curated_complete_97	336	NA	p_Bacillota;c_Clostridia;o_Eubacteriales;-_unclassified Eubacteriales;s_Clostridiales bacterium
ERR11566171_NODE_22_curated_complete	ERR11566171_NODE_22_curated_complete_102	283	TraX	p_Bacillota;c_Clostridia;o_Lachnospirales;f_Lachnospiraceae;g_Blautia;s_Blautia hydrogenotrophica;-_Blautia hydrogenotrophica DSM 10507
ERR11566171_NODE_22_curated_complete	ERR11566171_NODE_22_curated_complete_103	256	Bro-N + ANT	p_Bacillota;c_Bacilli;o_Bacillales;f_Bacillaceae;g_Geobacillus;-_unclassified Geobacillus;s_Geobacillus sp. PA-3
ERR11566171_NODE_22_curated_complete	ERR11566171_NODE_22_curated_complete_106	142	NA	p_Bacillota;c_Clostridia;o_Eubacteriales;f_Oscillospiraceae;g_Anaerofilum;-_unclassified Anaerofilum;s_Anaerofilum sp. An201
ERR11566171_NODE_22_curated_complete	ERR11566171_NODE_22_curated_complete_108	220	NA	p_Bacillota;c_Erysipelotrichia;o_Erysipelotrichales;f_Erysipelotrichaceae;-_unclassified Erysipelotrichaceae;s_Erysipelotrichaceae bacterium
ERR11566171_NODE_22_curated_complete	ERR11566171_NODE_22_curated_complete_110	172	RRXRR	p_Bacillota;c_Negativicutes;o_Selenomonadales;f_Selenomonadaceae;g_Selenomonas;s_Selenomonas ruminantium
ERR11566171_NODE_22_curated_complete	ERR11566171_NODE_22_curated_complete_114	408	Big_2 + Big_2 + Big_2 + zf-C2H2_10	p_Bacillota;c_Clostridia;o_Eubacteriales;-_Eubacteriales incertae sedis;g_Gemmiger;s_Gemmiger formicilis
ERR11566171_NODE_22_curated_complete	ERR11566171_NODE_22_curated_complete_115	7324	MBG_2 + MBG_2 + MBG_2 + MBG_2 + MBG_2 + MBG_2 + MBG_2 + DUF11 + DUF11 + DUF11 + DUF11 + DUF11 + DUF11 + DUF11 + DUF11 + DUF11 + DUF11 + DUF11 + DUF11 + DUF11 + DUF11	p_Bacillota;c_Clostridia;o_Eubacteriales;f_Oscillospiraceae;g_Ruthenibacterium;s_Ruthenibacterium lactatiformans
ERR11566171_NODE_22_curated_complete	ERR11566171_NODE_22_curated_complete_121	512	Band_7 + Flot	p_Bacillota;c_Clostridia;o_Eubacteriales;f_Oscillospiraceae;g_Subdoligranulum;-_unclassified Subdoligranulum;s_Subdoligranulum sp.
ERR11566171_NODE_22_curated_complete	ERR11566171_NODE_22_curated_complete_129	320	StbA	p_Bacillota;c_Clostridia;o_Eubacteriales;f_Oscillospiraceae;g_Ruthenibacterium;s_Ruthenibacterium lactatiformans
ERR11566171_NODE_22_curated_complete	ERR11566171_NODE_22_curated_complete_133	354	NA	p_Bacillota;c_Clostridia;o_Eubacteriales;f_Oscillospiraceae;g_Anaerofilum;-_unclassified Anaerofilum;s_Anaerofilum sp. An201
ERR11566171_NODE_22_curated_complete	ERR11566171_NODE_22_curated_complete_141	226	zf-trcl + zf-trcl	p_Bacillota;c_Clostridia;o_Eubacteriales;f_Clostridiaceae;g_Clostridium;s_Clostridium grantii;-_Clostridium grantii DSM 8605
ERR11566171_NODE_22_curated_complete	ERR11566171_NODE_22_curated_complete_143	447	SecY	p_Bacillota;c_Clostridia;o_Eubacteriales;f_Oscillospiraceae;g_Faecalibacterium;s_Candidatus Faecalibacterium faecigallinarum
ERR11566171_NODE_22_curated_complete	ERR11566171_NODE_22_curated_complete_146	388	FKBP_C	p_Bacillota;c_Clostridia;o_Eubacteriales;f_Oscillospiraceae;g_Faecalibacterium;s_Faecalibacterium prausnitzii
ERR11566171_NODE_22_curated_complete	ERR11566171_NODE_22_curated_complete_147	324	Sortase	p_Bacillota;c_Bacilli;o_Lactobacillales;f_Streptococcaceae;g_Streptococcus;-_unclassified Streptococcus;s_Streptococcus sp. DAT741
ERR11566171_NODE_22_curated_complete	ERR11566171_NODE_22_curated_complete_154	186	DDE_Tnp_1_6	p_Bacillota;c_Clostridia;o_Eubacteriales;f_Oscillospiraceae;g_Pseudoflavonifractor;-_unclassified Pseudoflavonifractor;s_Pseudoflavonifractor sp. An176
ERR11566171_NODE_22_curated_complete	ERR11566171_NODE_22_curated_complete_155	181	NA	p_Bacillota;c_Clostridia;o_Eubacteriales;f_Clostridiaceae;g_Clostridium;-_unclassified Clostridium;s_Clostridium sp. AF34-10BH
ERR11566171_NODE_22_curated_complete	ERR11566171_NODE_22_curated_complete_157	182	NA	p_Bacillota;c_Clostridia;o_Eubacteriales;f_Oscillospiraceae;g_Ruthenibacterium;s_Ruthenibacterium lactatiformans
ERR11566171_NODE_22_curated_complete	ERR11566171_NODE_22_curated_complete_160	292	Endonuclea_NS_2	p_Bacillota;c_Clostridia;o_Eubacteriales;f_Clostridiaceae;g_Clostridium;-_unclassified Clostridium;s_Clostridium sp. AF27-2AA
ERR11566171_NODE_22_curated_complete	ERR11566171_NODE_22_curated_complete_162	151	HNH	p_Bacillota;c_Clostridia;o_Eubacteriales;f_Oscillospiraceae;g_Ruthenibacterium;s_Ruthenibacterium lactatiformans
ERR11566171_NODE_22_curated_complete	ERR11566171_NODE_22_curated_complete_166	649	NA	p_Bacillota;c_Clostridia;o_Lachnospirales;f_Lachnospiraceae;g_Enterocloster;s_Enterocloster bolteae;-_Enterocloster bolteae ATCC BAA-613
ERR11566171_NODE_22_curated_complete	ERR11566171_NODE_22_curated_complete_169	152	NA	p_Bacillota;c_Bacilli;o_Lactobacillales;f_Carnobacteriaceae;g_Trichococcus;s_Trichococcus palustris
ERR11566171_NODE_22_curated_complete	ERR11566171_NODE_22_curated_complete_171	286	NA	p_Bacillota;c_Clostridia;o_Lachnospirales;f_Lachnospiraceae;g_Moryella;s_Moryella indoligenes
ERR11566171_NODE_22_curated_complete	ERR11566171_NODE_22_curated_complete_172	555	NA	p_Bacillota;c_Clostridia;o_Lachnospirales;f_Lachnospiraceae;g_Acetatifactor;s_Acetatifactor muris
ERR11566171_NODE_22_curated_complete	ERR11566171_NODE_22_curated_complete_176	164	NA	p_Bacillota;c_Clostridia;o_Eubacteriales;f_Oscillospiraceae;g_Faecalibacterium;-_unclassified Faecalibacterium;s_Faecalibacterium sp.
ERR11566171_NODE_22_curated_complete	ERR11566171_NODE_22_curated_complete_180	51	NA	p_Bacillota;c_Clostridia;o_Eubacteriales;f_Oscillospiraceae;g_Subdoligranulum;s_Subdoligranulum variabile
ERR11566171_NODE_22_curated_complete	ERR11566171_NODE_22_curated_complete_182	460	NA	p_Bacillota;c_Clostridia;o_Eubacteriales;f_Clostridiaceae;g_Clostridium;s_Clostridium perfringens
ERR11566171_NODE_22_curated_complete	ERR11566171_NODE_22_curated_complete_183	141	NA	p_Bacillota;c_Clostridia;o_Lachnospirales;f_Lachnospiraceae;-_unclassified Lachnospiraceae;s_Lachnospiraceae bacterium AM48-27BH
ERR11566171_NODE_22_curated_complete	ERR11566171_NODE_22_curated_complete_185	741	ATP-cone + NRDD	p_Bacillota;c_Clostridia;o_Eubacteriales;f_Oscillospiraceae;g_Subdoligranulum;s_Subdoligranulum variabile;-_Subdoligranulum variabile DSM 15176
ERR11566171_NODE_22_curated_complete	ERR11566171_NODE_22_curated_complete_191	200	NA	p_Bacillota;c_Clostridia;o_Eubacteriales;f_Oscillospiraceae;g_Anaerofilum;-_unclassified Anaerofilum;s_Anaerofilum sp. An201
ERR11566171_NODE_22_curated_complete	ERR11566171_NODE_22_curated_complete_192	69	NA	p_Bacillota;c_Clostridia;o_Eubacteriales;f_Oscillospiraceae;g_Ruthenibacterium;s_Ruthenibacterium lactatiformans
ERR11566171_NODE_22_curated_complete	ERR11566171_NODE_22_curated_complete_193	90	NA	p_Bacillota;c_Clostridia;o_Eubacteriales;f_Oscillospiraceae;g_Anaerofilum;-_unclassified Anaerofilum;s_Anaerofilum sp. An201
ERR11566171_NODE_22_curated_complete	ERR11566171_NODE_22_curated_complete_196	287	NA	p_Bacillota;c_Bacilli;o_Bacillales;f_Bacillaceae;g_Bacillus;-_unclassified Bacillus (in: firmicutes);s_Bacillus sp. MYb78
ERR11566171_NODE_22_curated_complete	ERR11566171_NODE_22_curated_complete_204	817	Toprim + Topoisom_bac	p_Bacillota;c_Clostridia;o_Eubacteriales;f_Oscillospiraceae;-_unclassified Oscillospiraceae;s_Oscillospiraceae bacterium
ERR11566171_NODE_22_curated_complete	ERR11566171_NODE_22_curated_complete_207	656	RecG_wedge + DEAD + Helicase_C	p_Bacillota;c_Clostridia;o_Eubacteriales;f_Oscillospiraceae;g_Anaerofilum;-_unclassified Anaerofilum;s_Anaerofilum sp. An201
ERR11566171_NODE_22_curated_complete	ERR11566171_NODE_22_curated_complete_212	110	NA	p_Bacillota;c_Clostridia;o_Eubacteriales;f_Oscillospiraceae;g_Subdoligranulum;-_unclassified Subdoligranulum;s_Subdoligranulum sp.
ERR11566171_NODE_22_curated_complete	ERR11566171_NODE_22_curated_complete_214	128	NA	p_Bacillota;c_Clostridia;o_Lachnospirales;f_Lachnospiraceae;g_Lachnoclostridium;s_Candidatus Lachnoclostridium stercoravium
ERR11566171_NODE_22_curated_complete	ERR11566171_NODE_22_curated_complete_217	151	zf-C4_Topoisom	p_Bacillota;c_Clostridia;o_Lachnospirales;f_Lachnospiraceae;-_unclassified Lachnospiraceae;s_Lachnospiraceae bacterium G41
ERR11566171_NODE_22_curated_complete	ERR11566171_NODE_22_curated_complete_218	496	Rep_3	p_Bacillota;c_Clostridia;o_Eubacteriales;f_Oscillospiraceae;-_unclassified Oscillospiraceae;s_Oscillospiraceae bacterium
ERR11566171_NODE_22_curated_complete	ERR11566171_NODE_22_curated_complete_219	283	AAA_31	p_Bacillota;c_Clostridia;o_Eubacteriales;f_Oscillospiraceae;-_unclassified Oscillospiraceae;s_Oscillospiraceae bacterium
ERR11566171_NODE_22_curated_complete	ERR11566171_NODE_22_curated_complete_220	433	ParBc	p_Bacillota;c_Clostridia;o_Eubacteriales;f_Oscillospiraceae;-_unclassified Oscillospiraceae;s_Oscillospiraceae bacterium
ERR11566171_NODE_22_curated_complete	ERR11566171_NODE_22_curated_complete_221	170	NA	p_Bacillota;c_Clostridia;o_Eubacteriales;f_Oscillospiraceae;-_unclassified Oscillospiraceae;s_Oscillospiraceae bacterium
ERR11566171_NODE_22_curated_complete	ERR11566171_NODE_22_curated_complete_222	389	OrfB_IS605 + OrfB_Zn_ribbon	p_Bacillota;c_Clostridia;o_Lachnospirales;f_Lachnospiraceae;g_Lachnospira;s_Lachnospira multipara
ERR11566171_NODE_22_curated_complete	ERR11566171_NODE_22_curated_complete_224	172	NA	p_Bacillota;c_Bacilli;o_Bacillales;f_Paenibacillaceae;g_Paenibacillus;s_Paenibacillus peoriae
ERR11566171_NODE_22_curated_complete	ERR11566171_NODE_22_curated_complete_228	688	DNA_ligase_aden + DNA_ligase_OB + DNA_ligase_ZBD + BRCT	p_Bacillota;c_Clostridia;o_Eubacteriales;-_Eubacteriales incertae sedis;f_Clostridiales Family XVII. Incertae Sedis;g_Sulfobacillus;s_Sulfobacillus thermosulfidooxidans
ERR11566171_NODE_22_curated_complete	ERR11566171_NODE_22_curated_complete_230	177	NT5C	p_Bacillota;c_Clostridia;o_Lachnospirales;f_Lachnospiraceae;g_Oribacterium;-_unclassified Oribacterium;s_Oribacterium sp. KHPX15
ERR11566171_NODE_22_curated_complete	ERR11566171_NODE_22_curated_complete_236	408	DUF3854	p_Bacillota;c_Erysipelotrichia;o_Erysipelotrichales;f_Erysipelotrichaceae;g_Stecheria;s_Stecheria intestinalis
ERR11566171_NODE_22_curated_complete	ERR11566171_NODE_22_curated_complete_238	338	NA	p_Bacillota;c_Clostridia;o_Eubacteriales;f_Oscillospiraceae;g_Ruthenibacterium;s_Ruthenibacterium lactatiformans
ERR11566171_NODE_22_curated_complete	ERR11566171_NODE_22_curated_complete_241	187	Peptidase_S24	p_Bacillota;c_Clostridia;o_Eubacteriales;f_Oscillospiraceae;g_Anaerofilum;-_unclassified Anaerofilum;s_Anaerofilum sp. An201
ERR11566171_NODE_22_curated_complete	ERR11566171_NODE_22_curated_complete_243	101	NA	p_Bacillota;c_Clostridia;o_Eubacteriales;-_unclassified Eubacteriales;s_Clostridiales bacterium
ERR11566171_NODE_22_curated_complete	ERR11566171_NODE_22_curated_complete_246	253	Thy1	p_Bacillota;c_Clostridia;o_Eubacteriales;f_Oscillospiraceae;-_unclassified Oscillospiraceae;s_Oscillospiraceae bacterium
ERR11566171_NODE_22_curated_complete	ERR11566171_NODE_22_curated_complete_247	79	NA	p_Bacillota;c_Clostridia;o_Eubacteriales;f_Clostridiaceae;g_Clostridium;-_environmental samples;s_uncultured Clostridium sp.
ERR11566171_NODE_22_curated_complete	ERR11566171_NODE_22_curated_complete_248	191	NA	p_Bacillota;c_Clostridia;o_Eubacteriales;f_Oscillospiraceae;g_Anaerofilum;-_unclassified Anaerofilum;s_Anaerofilum sp. An201
ERR11566171_NODE_22_curated_complete	ERR11566171_NODE_22_curated_complete_250	250	NA	p_Bacillota;c_Bacilli;o_Bacillales;f_Bacillaceae;g_Bacillus;-_Bacillus subtilis group;s_Bacillus licheniformis;-_Bacillus licheniformis CG-B52
ERR11566171_NODE_22_curated_complete	ERR11566171_NODE_22_curated_complete_253	222	NA	p_Bacillota;c_Clostridia;o_Eubacteriales;f_Butyricicoccaceae;g_Butyricicoccus;-_unclassified Butyricicoccus;s_Butyricicoccus sp. AF22-28AC
ERR11566171_NODE_22_curated_complete	ERR11566171_NODE_22_curated_complete_255	414	YqaJ	p_Bacillota;c_Clostridia;o_Eubacteriales;f_Oscillospiraceae;g_Ruthenibacterium;s_Ruthenibacterium lactatiformans
ERR11566171_NODE_22_curated_complete	ERR11566171_NODE_22_curated_complete_258	766	HHH_4 + AAA_30 + SH3_13 + UvrD_C_2	p_Bacillota;c_Clostridia;o_Eubacteriales;f_Oscillospiraceae;g_Anaerofilum;-_unclassified Anaerofilum;s_Anaerofilum sp. An201
ERR11566171_NODE_22_curated_complete	ERR11566171_NODE_22_curated_complete_260	1336	NA	p_Bacillota;c_Clostridia;o_Eubacteriales;f_Oscillospiraceae;g_Ruthenibacterium;s_Ruthenibacterium lactatiformans
ERR11566171_NODE_22_curated_complete	ERR11566171_NODE_22_curated_complete_263	270	N6_N4_Mtase	p_Bacillota;c_Clostridia;o_Lachnospirales;f_Lachnospiraceae;g_Lachnospira;s_Lachnospira eligens
ERR11566171_NODE_22_curated_complete	ERR11566171_NODE_22_curated_complete_267	303	HTH_21 + rve	p_Bacillota;c_Clostridia;o_Lachnospirales;f_Lachnospiraceae;-_Lachnospiraceae incertae sedis;g_Candidatus Pullilachnospira;s_Candidatus Pullilachnospira stercoravium
ERR11566171_NODE_22_curated_complete	ERR11566171_NODE_22_curated_complete_268	787	T4SS-DNA_transf + TraG-D_C	p_Bacillota;c_Clostridia;o_Eubacteriales;f_Oscillospiraceae;g_Ruthenibacterium;s_Ruthenibacterium lactatiformans
ERR11566171_NODE_22_curated_complete	ERR11566171_NODE_22_curated_complete_269	384	NA	p_Bacillota;c_Clostridia;o_Eubacteriales;f_Oscillospiraceae;g_Anaerofilum;-_unclassified Anaerofilum;s_Anaerofilum sp. An201
ERR11566171_NODE_22_curated_complete	ERR11566171_NODE_22_curated_complete_272	505	NA	p_Bacillota;c_Clostridia;o_Eubacteriales;f_Oscillospiraceae;g_Ruthenibacterium;s_Ruthenibacterium lactatiformans
ERR11566171_NODE_22_curated_complete	ERR11566171_NODE_22_curated_complete_273	855	NA	p_Bacillota;c_Clostridia;o_Eubacteriales;f_Oscillospiraceae;g_Anaerofilum;-_unclassified Anaerofilum;s_Anaerofilum sp. An201
ERR11566171_NODE_22_curated_complete	ERR11566171_NODE_22_curated_complete_276	419	NA	p_Bacillota;c_Clostridia;o_Eubacteriales;f_Oscillospiraceae;g_Ruthenibacterium;s_Ruthenibacterium lactatiformans
ERR11566171_NODE_22_curated_complete	ERR11566171_NODE_22_curated_complete_277	148	bPH_2	p_Bacillota;c_Clostridia;o_Eubacteriales;f_Eubacteriaceae;g_Eubacterium;-_unclassified Eubacterium;s_Eubacterium sp.
ERR11566171_NODE_22_curated_complete	ERR11566171_NODE_22_curated_complete_279	274	Sortase	p_Bacillota;c_Erysipelotrichia;o_Erysipelotrichales;f_Turicibacteraceae;g_Turicibacter;s_Turicibacter bilis
ERR11566171_NODE_22_curated_complete	ERR11566171_NODE_22_curated_complete_283	124	NA	p_Bacillota;c_Clostridia;o_Eubacteriales;-_Eubacteriales incertae sedis;g_Flintibacter;s_Flintibacter faecis
ERR11566171_NODE_22_curated_complete	ERR11566171_NODE_22_curated_complete_288	565	SBP_bac_11 + VWA	p_Bacillota;c_Clostridia;o_Lachnospirales;f_Lachnospiraceae;-_unclassified Lachnospiraceae;s_Lachnospiraceae bacterium
ERR11566171_NODE_22_curated_complete	ERR11566171_NODE_22_curated_complete_293	722	RE_NgoFVII	p_Bacillota;c_Clostridia;o_Lachnospirales;f_Lachnospiraceae;g_Pseudobutyrivibrio;-_unclassified Pseudobutyrivibrio;s_Pseudobutyrivibrio sp.
ERR11566171_NODE_22_curated_complete	ERR11566171_NODE_22_curated_complete_296	710	NA	p_Bacillota;c_Clostridia;o_Eubacteriales;-_unclassified Eubacteriales;s_Clostridiales bacterium
ERR11566171_NODE_22_curated_complete	ERR11566171_NODE_22_curated_complete_297	147	DUF5348	p_Bacillota;c_Clostridia;o_Eubacteriales;f_Clostridiaceae;-_unclassified Clostridiaceae;s_Clostridiaceae bacterium
ERR11566171_NODE_22_curated_complete	ERR11566171_NODE_22_curated_complete_303	139	NA	p_Bacillota;c_Clostridia;o_Peptostreptococcales;f_Natronincolaceae;g_Alkaliphilus;-_unclassified Alkaliphilus;s_Alkaliphilus sp. B6464
ERR11566171_NODE_22_curated_complete	ERR11566171_NODE_22_curated_complete_306	215	AAA_33	p_Bacillota;c_Clostridia;o_Lachnospirales;f_Lachnospiraceae;g_Agathobacter;s_Agathobacter rectalis
ERR11566171_NODE_22_curated_complete	ERR11566171_NODE_22_curated_complete_307	313	NA	p_Bacillota;c_Clostridia;o_Eubacteriales;f_Oscillospiraceae;g_Subdoligranulum;-_unclassified Subdoligranulum;s_Subdoligranulum sp. APC924/74
ERR11566171_NODE_22_curated_complete	ERR11566171_NODE_22_curated_complete_308	84	NA	p_Bacillota;c_Clostridia;o_Eubacteriales;f_Butyricicoccaceae;g_Butyricicoccus;-_unclassified Butyricicoccus;s_Butyricicoccus sp. AM05-1
ERR3450778_NODE_10_curated_final	ERR3450778_NODE_10_curated_final_1	200	Metallophos	p_Bacillota;c_Clostridia;o_Eubacteriales;-_unclassified Eubacteriales;s_Clostridiales bacterium
ERR3450778_NODE_10_curated_final	ERR3450778_NODE_10_curated_final_2	469	PIN_4 + PhoH	p_Bacillota;c_Clostridia;o_Lachnospirales;f_Lachnospiraceae;g_Kineothrix;s_Kineothrix alysoides
ERR3450778_NODE_10_curated_final	ERR3450778_NODE_10_curated_final_7	421	Big_2 + Big_2	p_Bacillota;c_Tissierellia;-_Tissierellia incertae sedis;g_Ezakiella;s_Ezakiella coagulans
ERR3450778_NODE_10_curated_final	ERR3450778_NODE_10_curated_final_8	211	NA	p_Bacillota;-_unclassified Bacillota;s_Firmicutes bacterium CAG:124
ERR3450778_NODE_10_curated_final	ERR3450778_NODE_10_curated_final_9	287	NA	p_Bacillota;c_Clostridia;o_Eubacteriales;f_Oscillospiraceae;g_Fumia;s_Fumia xinanensis
ERR3450778_NODE_10_curated_final	ERR3450778_NODE_10_curated_final_10	464	PcfJ	p_Bacillota;c_Bacilli;o_Lactobacillales;f_Aerococcaceae;g_Aerococcus;s_Aerococcus christensenii
ERR3450778_NODE_10_curated_final	ERR3450778_NODE_10_curated_final_11	177	NA	p_Bacillota;c_Clostridia;o_Eubacteriales;f_Oscillospiraceae;g_Acetivibrio;s_Acetivibrio ethanolgignens
ERR3450778_NODE_10_curated_final	ERR3450778_NODE_10_curated_final_12	183	NA	p_Bacillota;c_Clostridia;o_Eubacteriales;f_Oscillospiraceae;g_Subdoligranulum;-_unclassified Subdoligranulum;s_Subdoligranulum sp.
ERR3450778_NODE_10_curated_final	ERR3450778_NODE_10_curated_final_16	433	AAA_21	p_Bacillota;c_Clostridia;o_Lachnospirales;f_Lachnospiraceae;g_Roseburia;s_Roseburia inulinivorans
ERR3450778_NODE_10_curated_final	ERR3450778_NODE_10_curated_final_17	217	RloB	p_Bacillota;c_Clostridia;o_Eubacteriales;f_Eubacteriaceae;g_Eubacterium;-_unclassified Eubacterium (in: firmicutes);s_Eubacterium sp. CAG:115
ERR3450778_NODE_10_curated_final	ERR3450778_NODE_10_curated_final_18	293	NA	p_Bacillota;c_Clostridia;o_Eubacteriales;f_Oscillospiraceae;g_Subdoligranulum;-_unclassified Subdoligranulum;s_Subdoligranulum sp. APC924/74
ERR3450778_NODE_10_curated_final	ERR3450778_NODE_10_curated_final_19	215	AAA_33	p_Bacillota;c_Clostridia;o_Lachnospirales;f_Lachnospiraceae;g_Agathobacter;s_Agathobacter rectalis
ERR3450778_NODE_10_curated_final	ERR3450778_NODE_10_curated_final_22	139	NA	p_Bacillota;c_Clostridia;o_Peptostreptococcales;f_Natronincolaceae;g_Alkaliphilus;-_unclassified Alkaliphilus;s_Alkaliphilus sp. B6464
ERR3450778_NODE_10_curated_final	ERR3450778_NODE_10_curated_final_29	710	NA	p_Bacillota;c_Clostridia;o_Eubacteriales;-_unclassified Eubacteriales;s_Clostridiales bacterium
ERR3450778_NODE_10_curated_final	ERR3450778_NODE_10_curated_final_31	134	Y1_Tnp	p_Bacillota;c_Bacilli;o_Bacillales;f_Bacillaceae;g_Bacillus;-_unclassified Bacillus (in: firmicutes);s_Bacillus sp. PGP15
ERR3450778_NODE_10_curated_final	ERR3450778_NODE_10_curated_final_32	579	NA	p_Bacillota;c_Clostridia;o_Eubacteriales;f_Oscillospiraceae;g_Subdoligranulum;-_unclassified Subdoligranulum;s_Subdoligranulum sp.
ERR3450778_NODE_10_curated_final	ERR3450778_NODE_10_curated_final_36	586	SBP_bac_11 + VWA	p_Bacillota;c_Clostridia;o_Lachnospirales;f_Lachnospiraceae;-_unclassified Lachnospiraceae;s_Lachnospiraceae bacterium
ERR3450778_NODE_10_curated_final	ERR3450778_NODE_10_curated_final_40	126	NA	p_Bacillota;c_Clostridia;o_Eubacteriales;-_Eubacteriales incertae sedis;g_Flintibacter;s_Flintibacter faecis
ERR3450778_NODE_10_curated_final	ERR3450778_NODE_10_curated_final_44	274	Sortase	p_Bacillota;c_Clostridia;o_Eubacteriales;f_Acutalibacteraceae;g_Anaeromassilibacillus;-_unclassified Anaeromassilibacillus;s_Anaeromassilibacillus sp. An172
ERR3450778_NODE_10_curated_final	ERR3450778_NODE_10_curated_final_46	148	bPH_2	p_Bacillota;c_Clostridia;o_Eubacteriales;f_Eubacteriaceae;g_Eubacterium;-_unclassified Eubacterium;s_Eubacterium sp.
ERR3450778_NODE_10_curated_final	ERR3450778_NODE_10_curated_final_47	419	NA	p_Bacillota;c_Clostridia;o_Eubacteriales;f_Oscillospiraceae;g_Ruthenibacterium;s_Ruthenibacterium lactatiformans
ERR3450778_NODE_10_curated_final	ERR3450778_NODE_10_curated_final_50	855	NA	p_Bacillota;c_Clostridia;o_Eubacteriales;f_Oscillospiraceae;g_Anaerofilum;-_unclassified Anaerofilum;s_Anaerofilum sp. An201
ERR3450778_NODE_10_curated_final	ERR3450778_NODE_10_curated_final_51	505	NA	p_Bacillota;c_Clostridia;o_Eubacteriales;f_Oscillospiraceae;g_Ruthenibacterium;s_Ruthenibacterium lactatiformans
ERR3450778_NODE_10_curated_final	ERR3450778_NODE_10_curated_final_54	384	NA	p_Bacillota;c_Clostridia;o_Eubacteriales;f_Oscillospiraceae;g_Anaerofilum;-_unclassified Anaerofilum;s_Anaerofilum sp. An201
ERR3450778_NODE_10_curated_final	ERR3450778_NODE_10_curated_final_55	787	T4SS-DNA_transf + TraG-D_C	p_Bacillota;c_Clostridia;o_Eubacteriales;f_Oscillospiraceae;g_Ruthenibacterium;s_Ruthenibacterium lactatiformans
ERR3450778_NODE_10_curated_final	ERR3450778_NODE_10_curated_final_56	251	NA	p_Bacillota;c_Erysipelotrichia;o_Erysipelotrichales;f_Erysipelotrichaceae;g_Faecalitalea;s_Faecalitalea cylindroides
ERR3450778_NODE_10_curated_final	ERR3450778_NODE_10_curated_final_60	260	DUF4145	p_Bacillota;c_Clostridia;o_Eubacteriales;f_Oscillospiraceae;g_Solibaculum;s_Solibaculum mannosilyticum
ERR3450778_NODE_10_curated_final	ERR3450778_NODE_10_curated_final_64	607	N6_Mtase + N6_Mtase	p_Bacillota;c_Clostridia;o_Eubacteriales;f_Clostridiaceae;g_Clostridium;s_Clostridium botulinum
ERR3450778_NODE_10_curated_final	ERR3450778_NODE_10_curated_final_69	300	N6_N4_Mtase	p_Bacillota;c_Clostridia;o_Lachnospirales;f_Lachnospiraceae;g_Lachnospira;s_Lachnospira eligens
ERR3450778_NODE_10_curated_final	ERR3450778_NODE_10_curated_final_72	1336	NA	p_Bacillota;c_Clostridia;o_Eubacteriales;f_Oscillospiraceae;g_Ruthenibacterium;s_Ruthenibacterium lactatiformans
ERR3450778_NODE_10_curated_final	ERR3450778_NODE_10_curated_final_74	766	HHH_4 + AAA_30 + SH3_13 + UvrD_C_2	p_Bacillota;c_Clostridia;o_Eubacteriales;f_Oscillospiraceae;g_Anaerofilum;-_unclassified Anaerofilum;s_Anaerofilum sp. An201
ERR3450778_NODE_10_curated_final	ERR3450778_NODE_10_curated_final_77	414	YqaJ	p_Bacillota;c_Clostridia;o_Eubacteriales;f_Oscillospiraceae;g_Ruthenibacterium;s_Ruthenibacterium lactatiformans
ERR3450778_NODE_10_curated_final	ERR3450778_NODE_10_curated_final_79	222	NA	p_Bacillota;c_Clostridia;o_Eubacteriales;f_Butyricicoccaceae;g_Butyricicoccus;-_unclassified Butyricicoccus;s_Butyricicoccus sp. AF22-28AC
ERR3450778_NODE_10_curated_final	ERR3450778_NODE_10_curated_final_80	281	Thy1	p_Bacillota;c_Clostridia;o_Eubacteriales;f_Oscillospiraceae;g_Subdoligranulum;s_Subdoligranulum variabile;-_Subdoligranulum variabile DSM 15176
ERR3450778_NODE_10_curated_final	ERR3450778_NODE_10_curated_final_82	194	NA	p_Bacillota;c_Clostridia;o_Eubacteriales;f_Clostridiaceae;-_unclassified Clostridiaceae;s_Clostridiaceae bacterium
ERR3450778_NODE_10_curated_final	ERR3450778_NODE_10_curated_final_83	101	NA	p_Bacillota;c_Clostridia;o_Eubacteriales;-_unclassified Eubacteriales;s_Clostridiales bacterium
ERR3450778_NODE_10_curated_final	ERR3450778_NODE_10_curated_final_85	187	Peptidase_S24	p_Bacillota;c_Clostridia;o_Eubacteriales;f_Oscillospiraceae;g_Anaerofilum;-_unclassified Anaerofilum;s_Anaerofilum sp. An201
ERR3450778_NODE_10_curated_final	ERR3450778_NODE_10_curated_final_88	338	NA	p_Bacillota;c_Clostridia;o_Eubacteriales;f_Oscillospiraceae;g_Ruthenibacterium;s_Ruthenibacterium lactatiformans
ERR3450778_NODE_10_curated_final	ERR3450778_NODE_10_curated_final_90	408	DUF3854	p_Bacillota;c_Erysipelotrichia;o_Erysipelotrichales;f_Erysipelotrichaceae;g_Stecheria;s_Stecheria intestinalis
ERR3450778_NODE_10_curated_final	ERR3450778_NODE_10_curated_final_96	177	NT5C	p_Bacillota;c_Clostridia;o_Lachnospirales;f_Lachnospiraceae;g_Oribacterium;-_unclassified Oribacterium;s_Oribacterium sp. KHPX15
ERR3450778_NODE_10_curated_final	ERR3450778_NODE_10_curated_final_98	688	DNA_ligase_aden + DNA_ligase_OB + DNA_ligase_ZBD + BRCT	p_Bacillota;c_Bacilli;o_Lactobacillales;f_Lactobacillaceae;g_Weissella;s_Weissella diestrammenae
ERR3450778_NODE_10_curated_final	ERR3450778_NODE_10_curated_final_102	172	NA	p_Bacillota;c_Bacilli;o_Bacillales;f_Paenibacillaceae;g_Paenibacillus;s_Paenibacillus peoriae
ERR3450778_NODE_10_curated_final	ERR3450778_NODE_10_curated_final_104	389	OrfB_IS605 + OrfB_Zn_ribbon	p_Bacillota;c_Clostridia;o_Lachnospirales;f_Lachnospiraceae;g_Lachnospira;s_Lachnospira multipara
ERR3450778_NODE_10_curated_final	ERR3450778_NODE_10_curated_final_105	170	NA	p_Bacillota;c_Clostridia;o_Eubacteriales;f_Oscillospiraceae;-_unclassified Oscillospiraceae;s_Oscillospiraceae bacterium
ERR3450778_NODE_10_curated_final	ERR3450778_NODE_10_curated_final_106	433	ParBc	p_Bacillota;c_Clostridia;o_Eubacteriales;f_Oscillospiraceae;-_unclassified Oscillospiraceae;s_Oscillospiraceae bacterium
ERR3450778_NODE_10_curated_final	ERR3450778_NODE_10_curated_final_107	283	AAA_31	p_Bacillota;c_Clostridia;o_Eubacteriales;f_Oscillospiraceae;-_unclassified Oscillospiraceae;s_Oscillospiraceae bacterium
ERR3450778_NODE_10_curated_final	ERR3450778_NODE_10_curated_final_108	496	Rep_3	p_Bacillota;c_Clostridia;o_Eubacteriales;f_Oscillospiraceae;-_unclassified Oscillospiraceae;s_Oscillospiraceae bacterium
ERR3450778_NODE_10_curated_final	ERR3450778_NODE_10_curated_final_110	151	zf-C4_Topoisom	p_Bacillota;c_Clostridia;o_Lachnospirales;f_Lachnospiraceae;-_unclassified Lachnospiraceae;s_Lachnospiraceae bacterium G41
ERR3450778_NODE_10_curated_final	ERR3450778_NODE_10_curated_final_113	128	NA	p_Bacillota;c_Clostridia;o_Lachnospirales;f_Lachnospiraceae;g_Lachnoclostridium;s_Candidatus Lachnoclostridium stercoravium
ERR3450778_NODE_10_curated_final	ERR3450778_NODE_10_curated_final_114	110	NA	p_Bacillota;c_Clostridia;o_Eubacteriales;f_Oscillospiraceae;g_Subdoligranulum;-_unclassified Subdoligranulum;s_Subdoligranulum sp.
ERR3450778_NODE_10_curated_final	ERR3450778_NODE_10_curated_final_117	895	VWA	p_Bacillota;c_Clostridia;o_Eubacteriales;f_Oscillospiraceae;g_Ruthenibacterium;s_Ruthenibacterium lactatiformans
ERR3450778_NODE_10_curated_final	ERR3450778_NODE_10_curated_final_120	656	RecG_wedge + DEAD + Helicase_C	p_Bacillota;c_Clostridia;o_Eubacteriales;f_Oscillospiraceae;g_Anaerofilum;-_unclassified Anaerofilum;s_Anaerofilum sp. An201
ERR3450778_NODE_10_curated_final	ERR3450778_NODE_10_curated_final_123	817	Toprim + Topoisom_bac	p_Bacillota;c_Clostridia;o_Eubacteriales;f_Oscillospiraceae;-_unclassified Oscillospiraceae;s_Oscillospiraceae bacterium
ERR3450778_NODE_10_curated_final	ERR3450778_NODE_10_curated_final_131	287	NA	p_Bacillota;c_Bacilli;o_Bacillales;f_Bacillaceae;g_Bacillus;-_unclassified Bacillus (in: firmicutes);s_Bacillus sp. MYb78
ERR3450778_NODE_10_curated_final	ERR3450778_NODE_10_curated_final_134	90	NA	p_Bacillota;c_Clostridia;o_Eubacteriales;f_Oscillospiraceae;g_Anaerofilum;-_unclassified Anaerofilum;s_Anaerofilum sp. An201
ERR3450778_NODE_10_curated_final	ERR3450778_NODE_10_curated_final_135	69	NA	p_Bacillota;c_Clostridia;o_Eubacteriales;f_Oscillospiraceae;g_Ruthenibacterium;s_Ruthenibacterium lactatiformans
ERR3450778_NODE_10_curated_final	ERR3450778_NODE_10_curated_final_136	201	NA	p_Bacillota;c_Clostridia;o_Eubacteriales;f_Oscillospiraceae;g_Anaerofilum;-_unclassified Anaerofilum;s_Anaerofilum sp. An201
ERR3450778_NODE_10_curated_final	ERR3450778_NODE_10_curated_final_138	153	DUF1768	p_Bacillota;c_Clostridia;o_Lachnospirales;f_Lachnospiraceae;g_Dorea;s_Dorea formicigenerans;-_Dorea formicigenerans ATCC 27755
ERR3450778_NODE_10_curated_final	ERR3450778_NODE_10_curated_final_140	448	DUF4379 + DUF4379 + DUF4379	p_Bacillota;c_Clostridia;o_Lachnospirales;f_Lachnospiraceae;g_Agathobacter;s_Agathobacter rectalis
ERR3450778_NODE_10_curated_final	ERR3450778_NODE_10_curated_final_141	244	DUF4379 + DUF4379	p_Bacillota;c_Clostridia;o_Eubacteriales;f_Oscillospiraceae;g_Ruminococcus;s_Ruminococcus bromii
ERR3450778_NODE_10_curated_final	ERR3450778_NODE_10_curated_final_143	741	ATP-cone + NRDD	p_Bacillota;c_Clostridia;o_Eubacteriales;f_Oscillospiraceae;g_Subdoligranulum;s_Subdoligranulum variabile;-_Subdoligranulum variabile DSM 15176
ERR3450778_NODE_10_curated_final	ERR3450778_NODE_10_curated_final_145	141	NA	p_Bacillota;c_Clostridia;o_Lachnospirales;f_Lachnospiraceae;-_unclassified Lachnospiraceae;s_Lachnospiraceae bacterium AM48-27BH
ERR3450778_NODE_10_curated_final	ERR3450778_NODE_10_curated_final_146	460	NA	p_Bacillota;c_Clostridia;o_Eubacteriales;f_Clostridiaceae;g_Clostridium;s_Clostridium perfringens
ERR3450778_NODE_10_curated_final	ERR3450778_NODE_10_curated_final_148	51	NA	p_Bacillota;c_Clostridia;o_Eubacteriales;f_Oscillospiraceae;g_Subdoligranulum;s_Subdoligranulum variabile
ERR3450778_NODE_10_curated_final	ERR3450778_NODE_10_curated_final_153	164	NA	p_Bacillota;c_Clostridia;o_Eubacteriales;f_Oscillospiraceae;g_Faecalibacterium;-_unclassified Faecalibacterium;s_Faecalibacterium sp.
ERR3450778_NODE_10_curated_final	ERR3450778_NODE_10_curated_final_157	555	NA	p_Bacillota;c_Clostridia;o_Lachnospirales;f_Lachnospiraceae;g_Acetatifactor;s_Acetatifactor muris
ERR3450778_NODE_10_curated_final	ERR3450778_NODE_10_curated_final_158	237	NA	p_Bacillota;c_Clostridia;o_Eubacteriales;f_Oscillospiraceae;-_unclassified Oscillospiraceae;s_Oscillospiraceae bacterium NTUH-002-81
ERR3450778_NODE_10_curated_final	ERR3450778_NODE_10_curated_final_159	662	NA	p_Bacillota;c_Clostridia;o_Eubacteriales;f_Eubacteriaceae;g_Eubacterium;-_unclassified Eubacterium (in: firmicutes);s_Eubacterium sp. OM08-24
[truncated: 4,158 more rows]

## Sheet: ST4
Supplementary Table 4 | The protein-coding genes of curated Hodor genomes most similar to those from viruses. Note that the prophage genomes have been removed from the curated Hodor genomes before performing this analysis.
[truncated: 428 more rows]

[truncated: 10 more sheets: ST5, ST6, ST7, ST8, ST9, ST10, ST11, ST12, ST13, ST14]
